# Supplementary material for: Vitamin D-Related Genes, Blood Vitamin D Levels and Colorectal Cancer Risk in Western European Populations
Source: Nutrients. 2019 Aug 20;11(8):1954. doi: 10.3390/nu11081954 (PMC6722852; doi:10.3390/nu11081954)
Supplement: Supplementary file 1 [file nutrients-11-01954-s001.xlsx]

## Sheet: Supplementary Table 1
	Supplementary Table 1. Characteristics of SNPs used in the study.
	NOTE: MAF among European populations (EUR) were obtained from the SNPSnap online software (Broad Institute, MIT and Harvard, Cambridge, MA, USA; https://data.broadinstitute.org/mpg/snpsnap) based on Phase 3 data from the 1000 Genomes Project.
	SNP	Gene	Chr	Position	Minor allele	Ancestral allele	MAF EUR (SNPSnap 2016)	MAF EPIC	% missing values in EPIC	HWE P-value	Reason for exclusion
	Genes involved in vitamin D metabolism
	rs1033765	CUBN	10	17141952	C	A	0.15	0.115011	0.0376893	0.1054
	rs10508517	CUBN	10	16997891	A	G	0.07	0.0312772		6.33e-05	Failed HWE
	rs10508518	CUBN	10	17041473	C	A	0.29	0.296654	0.034167	0.05807
	rs10752062	CUBN	10	16906508	G	A	0.27	0.297287	0.0651638	0.6895
	rs10795433	CUBN	10	16969923	C	A	0.16	0.163287	0.0116238	0.8437
	rs10795440	CUBN	10	17110595	G	A	0.19	0.189427	0.0200775	0.03416
	rs10795444	CUBN	10	17138964	T	A	0.05	0.0399543	0.403311	0.1551	Missing >20%
	rs10795445	CUBN	10	17143996	G	A	0.15	0.131598	0.00634026	0.05994
	rs10904824	CUBN	10	16874749	A	G	0.11	0.0931408	0.0038746	0.8739
	rs10904827	CUBN	10	16906342			0.21				Failed genotyping
	rs10904833	CUBN	10	16939976	A	C	0.48	0.472467	0.0162029	0.6247
	rs10904839	CUBN	10	16974133	G	A	0.21	0.205455	0.0105671	0.6204
	rs10904851	CUBN	10	16997827	A	G	0.32	0.327407	0.0281789	0.4583
	rs10904855	CUBN	10	16999451	G	A	0.3	0.291939	0.0109193	0.3617
	rs10904861	CUBN	10	17030775	A	G	0.32	0.334193	0.0221909	0.7606
	rs10904865	CUBN	10	17080633	G	A	0.09	0.0697589	0.0158507	0.8345
	rs10904866	CUBN	10	17084626			0.29				Failed genotyping
	rs10904881	CUBN	10	17172952	A	C	0.39	0.419986	0.00739697	0.8251
	rs10904883	CUBN	10	17175484	A	C	0.34	0.324453	0.0162029	0.6224
	rs11254227	CUBN	10	16864009	C	G	0.03	0.0320233	0.0137372	0.3971
	rs11254232	CUBN	10	16871321	C	A	0.1	0.0815884	0.00563579	0.4744
	rs11254237	CUBN	10	16874113	T	A	0.04	0.0432277	0.00422684	0.3217
	rs11254269	CUBN	10	16939840	A	G	0.11	0.0756824	0.719972	1	Missing >20%
	rs11254275	CUBN	10	16962352	G	A	0.31	0.319003	0.00528355	0.9507
	rs11254276	CUBN	10	16962598			0.45				Failed genotyping
	rs11254284	CUBN	10	16978429	G	A	0.37	0.358696	0.00915815	0.3806
	rs11254308	CUBN	10	17016337			0.39				Failed genotyping
	rs11254337	CUBN	10	17076818	A	G	0.22	0.183029	0.0538922	0.782
	rs11254339	CUBN	10	17081153	A	G	0.14	0.100291	0.0162029	0.5485
	rs11254351	CUBN	10	17099016	G	A	0.08	0.0689531	0.0066925	0.5278
	rs11254355	CUBN	10	17111239	T	A	0.47	0.464646	0.7559	0.6143	Missing >20%
	rs11254363	CUBN	10	17130693	G	A	0.32	0.264372	0.0553012	0.1791
	rs11254375	CUBN	10	17159192	C	A	0.27	0.319273	0.0116238	0.1924
	rs11254389	CUBN	10	17176825	A	G	0.15	0.140966	0.0880592	1
	rs11591606	CUBN	10	16911115	A	G	0.19	0.173851	0.000704473	0.4557
	rs11591673	CUBN	10	16976226	A	G	0.27	0.279508	0.00528355	0.6402
	rs11591878	CUBN	10	17052261	A	G	0.1	0.0938759	0.128566	1
	rs11592014	CUBN	10	17052955	A	C	0.39	0.398619	0.0109193	0.7789
	rs11595961	CUBN	10	17064417	A	C	0.06	0.0481125	0.0542445	1
	rs11814420	CUBN	10	16990908	G	A	0.5	0.472464	0.00951039	0.4826
	rs12146272	CUBN	10	17068186	G	C	0.43	0.422632	0.00951039	0.5444
	rs12243365	CUBN	10	17158132	A	C	0.16	0.206562	0.0274745	0.7396
	rs12243895	CUBN	10	17158973	A	G	0.36	0.262906	0.0225431	0.1608
	rs12244831	CUBN	10	17009523	G	A	0.24	0.252036	0.0288834	0.6139
	rs12251746	CUBN	10	16891468			0.05				Failed genotyping
	rs12254816	CUBN	10	17114788	G	A	0.09	0.107357	0.0408595	0.032
	rs12255119	CUBN	10	17023350	A	G	0.2	0.212165	0.00845368	0.1987
	rs12258009	CUBN	10	17040116	A	G	0.15	0.143836	0.00457908	1
	rs12263745	CUBN	10	17143310	G	A	0.41	0.322545	0.0271222	0.06107
	rs12414709	CUBN	10	17041083	A	G	0.11	0.123348	0.0179641	0.3822
	rs12766939	CUBN	10	17073135	G	A	0.3	0.270575	0.0109193	0.3054
	rs1276711	CUBN	10	17038701			0.05				Failed genotyping
	rs1276721	CUBN	10	16972263	C	G	0.19	0.189394	0.00422684	1
	rs1398431	CUBN	10	17011175	A	G	0.09	0.0941092	0.00140895	0.1143
	rs1512706	CUBN	10	17031834	A	G	0.05	0.0312966	0.0433251	0.1374
	rs1687695	CUBN	10	17013099			0.13				Failed genotyping
	rs1687696	CUBN	10	17012862	T	A	0.49	0.483265	0.122578	0.05895
	rs1687704	CUBN	10	17010732			0.41				Failed genotyping
	rs1687706	CUBN	10	17008183	G	A	0.38	0.18797		7.083e-26	Failed HWE
	rs1707285	CUBN	10	17013712	C	G	0.47	0.460205	0.10391	0.6113
	rs1707288	CUBN	10	17004421	G	A	0.3	0.238407	0.302924	0.004994	Missing >20%
	rs17336476	CUBN	10	16930735	G	A	0.04	0.0310136	0.0479042	0.03382
	rs17347211	CUBN	10	17079130			0.47				Failed genotyping
	rs17426570	CUBN	10	16908003	A	G	0.06	0.0596905	0.0324058	1
	rs17431426	CUBN	10	17068112	G	A	0.17	0.153902	0.00563579	0.5352
	rs17431739	CUBN	10	17074996	G	A	0.05	0.0276978	0.00352237	1
	rs1801222	CUBN	10	17156151			0.29				Failed genotyping
	rs1801224	CUBN	10	17147521	C	A	0.41	0.316289	0.0179641	0.3176
	rs1801230	CUBN	10	16877110	A	G	0.02	0.0234827	0.00739697	1
	rs1801231	CUBN	10	17024503	G	A	0.13	0.106039	0.00211342	0.5708
	rs1801239	CUBN	10	16919052	G	A	0.09	0.107143	0.052131	0.3925
	rs1877479	CUBN	10	16934264	C	G	0.36	0.351032	0.0313491	0.8118
	rs1907368	CUBN	10	17123351	G	A	0.4	0.444978	0.0292356	0.4091
	rs1914172	CUBN	10	17164221	A	C	0.31	0.350325	0.00951039	0.443
	rs1996317	CUBN	10	17133577	A	G	0.47	0.407022	0.0697429	0.4898
	rs2087631	CUBN	10	17095299			0.42				Failed genotyping
	rs2271460	CUBN	10	16961995	C	A	0.01	0.00936599	0.00422684	0.0001538
	rs2271461	CUBN	10	16975078	A	G	0.2	0.195166	0.00457908	0.5504
	rs2271462	CUBN	10	16982061			0.02				Failed genotyping
	rs2271469	CUBN	10	16994047	A	C	0.5	0.480332	0.18739	0.003063
	rs2273737	CUBN	10	17165552	C	A	0.11	0.0855856	0.0419162	0.007477
	rs2281649	CUBN	10	17156527	A	G	0.26	0.189356	0.00986263	0.8609
	rs2356215	CUBN	10	17073900	A	G	0.13	0.114327	0.0102149	0.8944
	rs2356590	CUBN	10	16979606	A	C	0.02	0.016129	0.0162029	1
	rs2603794	CUBN	10	16860063	G	A	0.18	0.172576	0.00774921	0.003468
	rs2603795	CUBN	10	16860256			0.31				Failed genotyping
	rs2603796	CUBN	10	16871456	A	G	0.33	0.335652	0.0151462	0.4667
	rs2603804	CUBN	10	16873744	G	A	0.13	0.130277	0.0112716	0.04263
	rs2669154	CUBN	10	16933460	C	A	0.4	0.39233	0.0436774	0.7325
	rs2942366	CUBN	10	17030854	A	G	0.46	0.436162	0.0271222	0.4393
	rs3012479	CUBN	10	17035822	A	C	0.34	0.322545	0.0109193	0.175
	rs3012501	CUBN	10	17018678	G	C	0.21	0.192813	0.072913	0.1087
	rs3740168	CUBN	10	16948390	C	G	0.02	0.0135531	0.0443818	1
	rs3847364	CUBN	10	16993821			0.43				Failed genotyping
	rs3847368	CUBN	10	17043817	C	A	0.15	0.170891	0.00563579	0.2549
	rs3934024	CUBN	10	16986810	A	G	0.05	0.0195473	0.3149	1	Missing >20%
	rs4082518	CUBN	10	17063026	A	G	0.18	0.198487	0.00317013	0.8006
	rs41289305	CUBN	10	16979714	G	A	0.17	0.183237	0.0126805	0.1052
	rs41335345	CUBN	10	17014995	A	G	0.14	0.15289	0.0204297	0.2504
	rs4335444	CUBN	10	17000617	A	G	0.44	0.444805	0.0038746	0.7444
	rs4525114	CUBN	10	17068275	G	A	0.08	0.0647744	0.0123283	0.0706
	rs45474496/rs1801238	CUBN	10	16932490	A	C	0.04	0.0319767		1
	rs45551835	CUBN	10	16932384	A	G	0.01	0.0129403	0.00105671	0.205
	rs4747284	CUBN	10	16863652	G	A	0.17	0.148805	0.00880592	0.8317
	rs4747290	CUBN	10	16995483	G	A	0.38	0.374459	0.00598802	0.3297
	rs4748340	CUBN	10	17047520	A	G	0.42	0.396254	0.00457908	0.501
	rs4748344	CUBN	10	17082521	G	A	0.27	0.258961	0.0158507	0.0905
	rs62619939	CUBN	10	16967586	C	G	0.12	0.0945236	0.0486087	1
	rs6602171	CUBN	10	17040237	A	G	0.2	0.204936	0.0436774	0.4498
	rs6602177	CUBN	10	17167141	G	A	0.35	0.29978	0.0197253	0.8974
	rs703060	CUBN	10	16876922	G	A	0.45	0.449078	0.197957	0.09349
	rs703075	CUBN	10	16911605	A	C	0.3	0.315129	0.0235999	0.4137
	rs7070148	CUBN	10	17164625			0.1				Failed genotyping
	rs7071215	CUBN	10	17006317	G	C	0.37	0.362573	0.0190208	0.9534
	rs7075681	CUBN	10	16983075	C	G	0.17	0.187879	0.0447341	0.08716
	rs7082270	CUBN	10	17089942	G	A	0.17	0.136566	0.0320535	0.908
	rs7090658	CUBN	10	16973346	G	A	0.48	0.446064	0.0169074	0.3257
	rs7094016	CUBN	10	16891317	A	G	0.06	0.0519288	0.768228	1	Missing >20%
	rs7096079	CUBN	10	17180675	A	C	0.49	0.48749	0.122578	0.5319
	rs7097054	CUBN	10	17013341	C	A	0.04	0.0413043	0.00880592	1
	rs7100290	CUBN	10	16945501	T	A	0.06	0.0690789	0.0186685	0.1404
	rs780635	CUBN	10	16866373	G	A	0.31	0.292912	0.168017	0.8325
	rs780803	CUBN	10	16950064			0.36				Failed genotyping
	rs780823	CUBN	10	16913380			0.35				Failed genotyping
	rs780825	CUBN	10	16912134			0.29				Failed genotyping
	rs780829	CUBN	10	16885658	G	C	0.29	0.303623	0.0112716	0.8988
	rs780837	CUBN	10	16923390	A	G	0.26	0.247696	0.0549489	0.05314
	rs780846	CUBN	10	16931010	C	A	0.26	0.242599	0.0038746	0.3421
	rs780847	CUBN	10	16930279	A	T	0.22	0.218037	0.0496654	0.01497
	rs7893395	CUBN	10	16905500	A	G	0.19	0.192365	0.040155	0.3807
	rs7896674	CUBN	10	17029662	G	A	0.26	0.263329	0.00281789	0.8355
	rs7897704	CUBN	10	16985159	G	A	0.22	0.187997	0.00493131	0.2523
	rs7898138	CUBN	10	16985498	G	A	0.39	0.370506	0.0221909	0.2226
	rs7900527	CUBN	10	16857992	C	G	0.16	0.17019	0.0158507	0.6337
	rs7904579	CUBN	10	17131753	G	C	0.42	0.365314	0.0218387	0.7697
	rs7906242	CUBN	10	17001812	A	G	0.39	0.404185	0.0186685	0.1598
	rs7912716	CUBN	10	16985317	A	G	0.13	0.0817308	0.789362	0.01002	Missing >20%
	rs7914868	CUBN	10	16973722	G	C	0.31	0.315712	0.0228954	1
	rs7916688	CUBN	10	17167422	A	G	0.27	0.290515	0.0443818	0.3199
	rs7918815	CUBN	10	16870173	T	A	0.3	0.278707	0.0605847	0.6812
	rs7918961	CUBN	10	16944477			0.19				Failed genotyping
	rs7922356	CUBN	10	17045711	A	C	0.12	0.123726	0.0165551	0.9011
	rs932640	CUBN	10	17167732			0.06				Failed genotyping
	rs9633766	CUBN	10	17012098	A	G	0.48	0.496997	0.0471997	0.5466
	rs9665553	CUBN	10	17104173	G	A	0.24	0.224261	0.225431	1	Missing >20%
	rs994715	CUBN	10	17135867	G	A	0.16	0.166173	0.0278267	0.7681
	rs116065115	CYP24A1	20	52773734		G	0	0	0.00704473	1	Constant
	rs1570669	CYP24A1	20	52774427	G	A	0.32	0.334683	0.0218387	0.3606
	rs2181874	CYP24A1	20	52784478	A	G	0.29	0.255227	0.00317013	0.672
	rs2208588	CYP24A1	20	52796971	T	A	0.47	0.254573		1.011e-18	Failed HWE
	rs2209314	CYP24A1	20	52778961	G	A	0.29	0.257278	0.0140895	0.9437
	rs2245153	CYP24A1	20	52786406			0.19				Failed genotyping
	rs2248359	CYP24A1	20	52791518	A	G	0.41	0.386295	0.047552	0.7723
	rs2296239	CYP24A1	20	52775528	A	G	0.21	0.204611	0.00352237	0.7418
	rs2296241	CYP24A1	20	52786219	G	A	0.47	0.436599	0.278267	0.2315	Missing >20%
	rs2426498	CYP24A1	20	52796681	C	G	0.12	0.116383	0.0288834	0.2316
	rs2585413	CYP24A1	20	52762480	A	G	0.32	0.290845	0.0894681	0.4967
	rs2585415	CYP24A1	20	52762981	A	G	0.38	0.355015	0.0109193	0.9531
	rs2585424	CYP24A1	20	52798579	A	C	0.09	0.0899922	0.0683339	0.7352
	rs2585428	CYP24A1	20	52786897	A	G	0.47	0.471542	0.0038746	0.3068
	rs2762926	CYP24A1	20	52762418	A	C	0.48	0.43349	0.0820712	0.3328
	rs2762929	CYP24A1	20	52766195	G	A	0.43	0.396137	0.0147939	1
	rs2762932	CYP24A1	20	52768391	G	A	0.19	0.164507	0.00457908	0.5579
	rs2762934	CYP24A1	20	52771261	A	G	0.22	0.197971	0.0405072	1
	rs2762941	CYP24A1	20	52783652	A	G	0.41	0.363438	0.0158507	0.4143
	rs35051736	CYP24A1	20	52788189			0.01				Failed genotyping
	rs3787554	CYP24A1	20	52782680	A	G	0.11	0.0948588	0.00845368	0.4313
	rs3787557	CYP24A1	20	52783135			0.13				Failed genotyping
	rs4809956	CYP24A1	20	52765472	A	G	0.19	0.186064	0.0334625	0.3682
	rs4809958	CYP24A1	20	52782438	C	A	0.16	0.147334	0.00317013	0.9149
	rs4809959	CYP24A1	20	52785859			0.49				Failed genotyping
	rs4809960	CYP24A1	20	52786073	G	A	0.23	0.225783	0.0130328	0.01067
	rs6022999	CYP24A1	20	52788013			0.25				Failed genotyping
	rs6068810	CYP24A1	20	52769351	A	C	0.05	0.0416368	0.00105671	0.2967
	rs6068816	CYP24A1	20	52781091	A	G	0.12	0.0932325	0.00246566	0.4264
	rs6068821	CYP24A1	20	52799201	A	G	0.41	0.39835	0.0422684	0.2305
	rs6097801	CYP24A1	20	52767434	A	G	0.13	0.13969	0.0331103	0.4981
	rs6097807	CYP24A1	20	52769455	G	A	0.24	0.236183	0.0338147	0.8218
	rs6097809	CYP24A1	20	52773510	G	A	0.06	0.0426621	0.403663	0.2062	Missing >20%
	rs6127119	CYP24A1	20	52779082	A	G	0.24	0.164407	0.804509	0.3959	Missing >20%
	rs927650	CYP24A1	20	52772741	A	G	0.46	0.4659	0.0887636	0.4971
	rs11677711	CYP27A1	2	219669375	C	A	0.05	0.0428468	0.00986263	0.3119
	rs4674338	CYP27A1	2	219647487	A	G	0.41	0.412152	0.0214864	0.02936
	rs6436094	CYP27A1	2	219687597	G	A	0.22	0.229035	0.225784	0.2686	Missing >20%
	rs645163	CYP27A1	2	219682257			0.13				Failed genotyping
	rs647952	CYP27A1	2	219681601	G	A	0.08	0.0819554	0.00281789	0.8578
	rs7600248	CYP27A1	2	219665963	G	A	0.49	0.00143885	0.00810144	1
	rs7603709	CYP27A1	2	219642601	A	G	0.47	0.47357	0.00774921	0.07511
	rs10877013	CYP27B1	12	58165085	A	G	0.32	0.29921	0.000704473	0.5657
	rs4646536	CYP27B1	12	58157988	G	A	0.32	0.297671	0.0183163	0.3018
	rs4646537	CYP27B1	12	58157281	C	A	0.04	0.0413075	0.000352237	1
	rs773643	CYP27B1	12	56575188	A	G	0.08	0.0802158	0.00563579	0.4643
	rs773649	CYP27B1	12	56571196	G	A	0.11	0.102545	0.0147939	0.03838
	rs7977273	CYP27B1	12	56583644			0.06				Failed genotyping
	rs8176345	CYP27B1	12	58158558	A	G	0.04	0.00107681	0.000352237	1
	rs10741657	CYP2R1	11	14914878			0.38				Failed genotyping
	rs10766197	CYP2R1	11	14921880	A	G	0.47	0.464232	0.0394505	0.8692
	rs10832313	CYP2R1	11	14922363	G	A	0.08	0.0894661	0.00634026	0.1878
	rs11023371	CYP2R1	11	14896271	A	G	0.07	0.0650759	0.00704473	1
	rs11023374	CYP2R1	11	14903636	G	A	0.29	0.271628	0.0158507	0.4523
	rs11819875	CYP2R1	11	14917297	C	A	0.18	0.189439	0.0271222	0.2506
	rs12794714	CYP2R1	11	14913575	A	G	0.45	0.441549	0.0398027	1
	rs1553006	CYP2R1	11	14922950	A	G	0.44	0.442992	0.00810144	0.1132
	rs1562902	CYP2R1	11	14918216	G	A	0.44	0.445818	0.0105671	0.1406
	rs16930609	CYP2R1	11	14915908	C	A	0.09	0.0846442	0.0433251	0.03182
	rs16930625	CYP2R1	11	14918308	G	A	0.08	0.0965618	0.0239521	0.06118
	rs1993116	CYP2R1	11	14910234	A	G	0.39	0.392121	0.0260655	0.3624
	rs2060793	CYP2R1	11	14915310	A	G	0.38	0.377818	0.0179641	0.3895
	rs7116978	CYP2R1	11	14881771			0.34				Failed genotyping
	rs7935792	CYP2R1	11	14909461			0.07				Failed genotyping
	rs1851426	CYP3A4	7	99382936	A	G	0.03	0.0367171	0.00246566	0.7083
	rs2014764	CYP3A4	7	99347506			0.11				Failed genotyping
	rs2242480	CYP3A4	7	99361466	A	G	0.08	0.100362	0.00774921	0.4574
	rs2246709	CYP3A4	7	99365719		G	0.27	0	0.00493131	1	Constant
	rs2724112	CYP3A4	7	93510823	A	G	0.46	0.46544	0.0486087	0.3216
	rs2740574	CYP3A4	7	99382096	G	A	0.03	0.0376884	0.000704473	1
	rs34914495	CYP3A4	7	93514647	G	A	0.1	0.103482	0.251849	0.4006	Missing >20%
	rs4646437	CYP3A4	7	99365083	A	G	0.09	0.114689	0.00774921	0.1872
	rs4986910	CYP3A4	7	99358524	G	A	0.01	0.00502874	0.000704473	0.03231
	rs6945984	CYP3A4	7	99348328			0.1				Failed genotyping
	rs6964587	CYP3A4	7	91630620	A	C	0.39	0.38453	0.0281789	0.1209
	rs1044482	DHCR7	11	71155171	G	A	0.3	0.304755	0.00493131	0.5687
	rs12785878	DHCR7	11	71167449	C	A	0.3	0.294372	0.00352237	0.8462
	rs12800438	DHCR7	11	71171003	G	A	0.3	0.29781	0.0200775	0.8972
	rs1630498	DHCR7	11	71150785			0.26				Failed genotyping
	rs1790349	DHCR7	11	71142350	G	A	0.19	0.189432	0.00246566	0.3824
	rs1792268	DHCR7	11	71146952	G	A	0.04	0.0470779	0.792885	0.1359	Missing >20%
	rs1792272	DHCR7	11	71142518	G	A	0.04	0.0330669	0.013385	0.01437
	rs2002064	DHCR7	11	71163420	G	A	0.25	0.239257	0.0126805	0.2082
	rs3794060	DHCR7	11	71187679	G	A	0.3	0.288856	0.0218387	0.9475
	rs4944957	DHCR7	11	71168035	A	G	0.3	0.293353	0.00986263	0.6499
	rs4945008	DHCR7	11	71221248	A	G	0.3	0.305865	0.0324058	0.8474
	rs7122671	DHCR7	11	71144468			0.07				Failed genotyping
	rs760241	DHCR7	11	71146691			0.04				Failed genotyping
	rs7944926	DHCR7	11	71165625	A	G	0.3	0.288717	0.0239521	0.6918
	rs909217	DHCR7	11	71146577	G	A	0.3	0.0393391	0.0986263	0.2577
	rs949177	DHCR7	11	71152461	A	G	0.05	0.0539074	0.00422684	0.1128
	rs1155563	GC	4	72643488	G	A	0.24	0.283876	0.0464952	0.7867
	rs12512631	GC	4	72601331	G	A	0.35	0.342984	0.032758	0.2044
	rs1352844	GC	4	72647749	A	G	0.13	0.128018	0.0176118	0.3955
	rs1352846	GC	4	72617775	G	A	0.25	0.302117	0.133145	0.1048
	rs1491711	GC	4	72602252	C	G	0.35	0.349602	0.00563579	0.8132
	rs1526692	GC	4	72578724			0.39				Failed genotyping
	rs16846876	GC	4	72592491	T	A	0.3	0.330609	0.0302924	0.4981
	rs17383291	GC	4	72605410	C	A	0.05	0.0686556	0.000704473	0.08764
	rs17467825	GC	4	72605517	G	A	0.25	0.27394	0.0915815	0.7251
	rs188812	GC	4	72627684	T	A	0.12	0.109137	0.00704473	0.1269
	rs2070741	GC	4	72607678	C	A	0.08	0.0634921	0.00317013	0.4949
	rs222020	GC	4	72636272	G	A	0.16	0.147122	0.00493131	0.1078
	rs222023	GC	4	72637080			0.05				Failed genotyping
	rs222035	GC	4	72621674			0.42				Failed genotyping
	rs222040	GC	4	72616932	G	A	0.4	0.42887	0.148644	0.9529
	rs222046	GC	4	72610850	A	G	0.08	0.0649635	0.0137372	0.8246
	rs222054	GC	4	72604299	G	C	0.33	0.289397	0.0123283	0.471
	rs2282679	GC	4	72608383			0.25				Failed genotyping
	rs2298849	GC	4	72648851	G	A	0.2	0.188227	0.0126805	1
	rs2298850	GC	4	72614267	C	G	0.24	0.274643	0.0468475	0.7306
	rs3733359	GC	4	72649774	A	G	0.05	0.0470935	0.0200775	0.5367
	rs3755967	GC	4	72609398	A	G	0.25	0.283333	0.0563579	0.2784
	rs423817	GC	4	72561180	A	C	0.26	0.239882	0.0243043	0.6561
	rs4588	GC	4	72618323	A	C	0.25	0.407333	0.492427	0.03411	Missing >20%
	rs56097748	GC	4	72629669	G	A	0.06	0.053918	0.00105671	0.0003942
	rs7041	GC	4	72618334			0.42				Failed genotyping
	rs705117	GC	4	72608115	G	A	0.17	0.140433	0.00598802	0.7381
	rs76781122	GC	4	72669661	A	C	0.03	0.0316319	0.00105671	0.6455
	rs76803094	GC	4	72620788	A	G	0.03	0.0266379	0.00457908	1
	rs842873	GC	4	72696465	C	G	0.45	0.493516	0.0637548	1
	rs842999	GC	4	72611690	G	C	0.41	0.3286		6.453e-10	Failed HWE
	rs1003456	LRP2	2	169988371	T	A	0.2	0.182085	0.0179641	0.2761
	rs10169232	LRP2	2	170054083	C	G	0.31	0.317558	0.00704473	0.3852
	rs10199676	LRP2	2	170208975	A	C	0.12	0.11788	0.00528355	0.09195
	rs10204688	LRP2	2	170039767	G	A	0.28	0.258621	0.0436774	0.1335
	rs10490129	LRP2	2	170129877	G	C	0.25	0.258016	0.0306446	0.6692
	rs10490131	LRP2	2	170051167	G	A	0.17	0.154068	0.0109193	0.6803
	rs11689553	LRP2	2	170067947	C	G	0.23	0.219093	0.0221909	0.3426
	rs11887007	LRP2	2	170149854	C	A	0.4	0.420029	0.00422684	0.9123
	rs11889511	LRP2	2	170197354	C	G	0.18	0.194725	0.00634026	0.5485
	rs12614394	LRP2	2	170208668	G	A	0.3	0.310029	0.0154984	0.4109
	rs12988804	LRP2	2	170117811	A	G	0.27	0.270682	0.00951039	0.04765
	rs13002827	LRP2	2	170228677	G	A	0.2	0.199639	0.00457908	0.8667
	rs13013931	LRP2	2	170132232			0.06				Failed genotyping
	rs13389381	LRP2	2	170080596	G	A	0.09	0.0882994	0.0165551	0.5008
	rs13397109	LRP2	2	170062078	C	G	0.05	0.0552746	0.00563579	0.433
	rs16856558	LRP2	2	170046653	A	G	0.02	0.01443	0.0066925	1
	rs16856748	LRP2	2	170146412	A	G	0.12	0.122731	0.0105671	0.802
	rs16856802	LRP2	2	170163970	C	A	0.04	0.0449964	0.00281789	0.1958
	rs2024481	LRP2	2	170030917	C	A	0.5	0.478324	0.00880592	0.8718
	rs2052297	LRP2	2	170071166	A	G	0.49	0.470455	0.059528	0.3476
	rs2075249	LRP2	2	170103351			0.46				Failed genotyping
	rs2075252	LRP2	2	170010985	A	G	0.24	0.244913	0.0116238	0.6619
	rs2111187	LRP2	2	169975314	A	G	0.3	0.30658	0.00528355	0.3118
	rs2161039	LRP2	2	170145273	A	G	0.46	0.443837	0.0162029	0.1553
	rs2228171	LRP2	2	170053505	A	G	0.26	0.264451	0.00563579	0.4895
	rs2229266	LRP2	2	170150671	A	G	0.24	0.254176	0.0123283	0.04667
	rs2229267	LRP2	2	170092395	G	A	0.26	0.237518	0.0246566	0.1344
	rs2239596	LRP2	2	170089824	G	A	0.33	0.316729	0.032758	0.5288
	rs2239602	LRP2	2	170025340	G	A	0.1	0.113669	0.00317013	0.6903
	rs2268365	LRP2	2	170094169	G	A	0.15	0.123604	0.0302924	0.8997
	rs2268372	LRP2	2	170064584	T	A	0.21	0.203852	0.0116238	0.2461
	rs2268373	LRP2	2	170064499	G	C	0.26	0.251267	0.00739697	0.04525
	rs2268379	LRP2	2	169997621	A	G	0.25	0.228529	0.032758	0.03006
	rs2302694	LRP2	2	170088351	A	G	0.11	0.100719	0.00176118	0.298
	rs2389557	LRP2	2	170211377	G	A	0.48	0.507973	0.046143	0.6593
	rs2544371	LRP2	2	170227070	A	G	0.46	0.493976	0.772807	0.3812	Missing >20%
	rs2544380	LRP2	2	170173117	A	C	0.28	0.290639	0.00880592	0.3958
	rs2544385	LRP2	2	170121703			0.1				Failed genotyping
	rs2544390	LRP2	2	170204846	G	A	0.37	0.499153		1.638e-16	Failed HWE
	rs2673170	LRP2	2	170164420	C	G	0.26	0.280928	0.0197253	0.2274
	rs2892802	LRP2	2	170157956	A	C	0.14	0.144245	0.00211342	0.514
	rs35853478	LRP2	2	170121846	A	G	0.05	0.046604	0.00598802	0.3611
	rs3755166	LRP2	2	170219881	A	G	0.39	0.416048	0.0454385	0.5751
	rs3770613	LRP2	2	170146913	G	A	0.42	0.452918	0.0697429	0.04905
	rs3770615	LRP2	2	170153975			0.04				Failed genotyping
	rs3821127	LRP2	2	170089182	G	A	0.45	0.391987	0.0810144	0.1581
	rs3845732	LRP2	2	170216868	A	G	0.19	0.218821	0.0581191	0.6875
	rs3914468	LRP2	2	170157400	G	A	0.29	0.26909	0.0214864	0.01902
	rs4667591	LRP2	2	170003432			0.21				Failed genotyping
	rs6713072	LRP2	2	170207896	A	G	0.42	0.402632	0.0426206	0.2319
	rs6718884	LRP2	2	170069899	G	A	0.11	0.0598694	0.0102149	0.007644
	rs6730118	LRP2	2	170205350	G	A	0.19	0.192767	0.0447341	0.00204
	rs700552	LRP2	2	170223176	C	G	0.34	0.350325	0.00598802	0.5546
	rs7568568	LRP2	2	170135215	G	A	0.08	0.0873472	0.00281789	0.1319
	rs7592152	LRP2	2	170047935	A	C	0.35	0.367171	0.00281789	0.6033
	rs7600336	LRP2	2	170073361	A	G	0.44	0.428309	0.0225431	0.2931
	rs830958	LRP2	2	170113034	C	A	0.11	0.101644	0.0447341	0.1324
	rs830964	LRP2	2	170156880	A	G	0.28	0.256053	0.019373	0.03918
	rs830965	LRP2	2	170157559	A	G	0.27	0.296932	0.0137372	0.04485
	rs830966	LRP2	2	170158988	C	G	0.44	0.426157	0.0218387	0.4712
	rs830971	LRP2	2	170162219			0.19				Failed genotyping
	rs830980	LRP2	2	170181664	C	A	0.09	0.0902439	0.273336	0.4505	Missing >20%
	rs830993	LRP2	2	170128699	A	T	0.09	0.0841189	0.0112716	0.4818
	rs830994	LRP2	2	170129528	G	A	0.34	0.299312	0.400493	0.2936	Missing >20%
	rs830995	LRP2	2	170129636	A	G	0.28	0.274448	0.0929905	0.8879
	rs830998	LRP2	2	170133086	A	C	0.19	0.192109	0.0278267	0.793
	rs831004	LRP2	2	170135742	G	A	0.41	0.404989	0.0176118	0.009682
	rs831005	LRP2	2	170137190	A	G	0.26	0.245339	0.0405072	0.4182
	rs831008	LRP2	2	170138896	G	A	0.15	0.145434	0.0211342	0.7439
	rs831011	LRP2	2	170139639	A	G	0.22	0.220947	0.0235999	0.1789
	rs831012	LRP2	2	170139862	G	A	0.31	0.320923	0.0373371	0.8024
	rs831017	LRP2	2	170145426	A	G	0.36	0.388721	0.0496654	0.2972
	rs831022	LRP2	2	170149613	A	G	0.3	0.33753	0.11976	0.1264
	rs831041	LRP2	2	170099446	C	A	0.46	0.457246	0.00880592	0.3031
	rs831044	LRP2	2	170104295	T	A	0.39	0.372826	0.00774921	0.863
	rs853988	LRP2	2	170160361	A	C	0.46	0.468195	0.0278267	0.4446
	rs9789747	LRP2	2	170037070	G	A	0.21	0.184287	0.0116238	0.6549
	Genes involved in mineral homeostasis/endocrine regulation of 1,25(OH)2D synthesis
	rs1042636	CASR	3	122003769	A	G	0.07	0.131674	0.00528355	0.7247
	rs10934582	CASR	3	122013354	A	G	0.32	0.320204	0.0162029	0.535
	rs1354162	CASR	3	121954077	A	C	0.12	0.106083	0.00598802	0.2015
	rs1393198	CASR	3	121987932	G	A	0.1	0.110322	0.0376893	1
	rs1463892	CASR	3	121970386	A	G	0.29	0.252874	0.0781965	0.3794
	rs1501900	CASR	3	121910628	A	T	0.18	0.172704	0.134202	0.8393
	rs17282008	CASR	3	121909830	C	G	0.26	0.269424	0.00211342	0.3759
	rs17282015	CASR	3	121913708	A	G	0.36	0.38671	0.0137372	0.6092
	rs17282022	CASR	3	121915255	G	A	0.46	0.440337	0.0172596	0.9126
	rs1801725	CASR	3	122003757			0.15				Failed genotyping
	rs1801726	CASR	3	122003832			0.04				Failed genotyping
	rs1847029	CASR	3	121907494	G	A	0.33	0.33944	0.00176118	0.8577
	rs2134224	CASR	3	122002178	G	A	0.14	0.143791	0.0116238	0.7425
	rs2173961	CASR	3	121968847	A	C	0.29	0.269679	0.0126805	0.9454
	rs2202127	CASR	3	121988355	G	A	0.32	0.326277	0.013385	1
	rs3749203	CASR	3	121976494	G	A	0.49	0.440806		3.309e-07	Failed HWE
	rs3792290	CASR	3	121993641	C	A	0.14	0.139111	0.0102149	0.3667
	rs3845917	CASR	3	121935826	G	A	0.22	0.215468	0.00140895	0.6341
	rs4677948	CASR	3	122004098			0.04				Failed genotyping
	rs4678029	CASR	3	121908434	G	A	0.23	0.214443	0.0158507	0.1476
	rs4678031	CASR	3	121909291	A	G	0.15	0.144307	0.011976	0.9134
	rs4678176	CASR	3	122009175	G	A	0.08	0.0791757	0.0066925	0.3571
	rs6438706	CASR	3	121916109	A	G	0.15	0.139148	0.320535	0.5899	Missing >20%
	rs6768109	CASR	3	121949401	A	G	0.23	0.247944		2.498e-06	Failed HWE
	rs6776158	CASR	3	121901849	G	A	0.33	0.338321	0.0197253	0.6293
	rs7635112	CASR	3	121966156	G	A	0.13	0.124009	0.00317013	1
	rs7639847	CASR	3	121949970	A	G	0.24	0.206408	0.0373371	0.5595
	rs7644981	CASR	3	121969712	G	A	0.13	0.123644	0.00634026	0.8042
	rs7647405	CASR	3	122000241	A	G	0.04	0.0434783	0.0102149	0.7411
	rs7647446	CASR	3	121970020	A	G	0.16	0.140637	0.0285312	0.8217
	rs7648041	CASR	3	121899848	A	G	0.31	0.0385174	0.0102149	0.2619
	rs937625	CASR	3	121971512	C	A	0.08	0.0678733	0.0479042	1
	rs9740	CASR	3	122005053	G	A	0.36	0.34058	0.00845368	0.8107
	rs9814524	CASR	3	121932534	A	G	0.22	0.212843	0.00598802	0.4714
	rs9820206	CASR	3	121933833	A	G	0.22	0.205377	0.0412117	0.6755
	rs9826770	CASR	3	121913115	G	A	0.05	0.055036	0.00105671	1
	rs9875101	CASR	3	121968090	A	G	0.29	0.269806	0.038746	0.8897
	rs16902897	CALB1	8	91095597	G	A	0.03	0.0280576	0.00176118	1
	rs1800645	CALB1	8	91095473	A	T	0.26	0.261078	0.0257133	0.5736
	rs10500784	PTH	11	13573825	C	A	0.36	0.349635	0.0151462	0.8122
	rs1459015	PTH	11	13522275	A	G	0.19	0.207759	0.00915815	0.3685
	rs192802	PTH	11	13516194	G	A	0.34	0.390613	0.0619937	0.001291
	rs307223	PTH	11	13534350			0.34				Failed genotyping
	rs6254	PTH	11	13514263	A	G	0.36	0.353289	0.0232476	0.5925
	rs6256	PTH	11	13514053	A	C	0.17	0.148844	0.00634026	0.7507
	rs694	PTH	11	13514417			0.35				Failed genotyping
	rs751610	PTH	11	13516379	A	G	0.19	0.195223	0.322649	0.4744	Missing >20%
	rs9630182	PTH	11	13620172	A	G	0.36	0.370632	0.0376893	0.003451
	rs1568760	TRPV5	7	142623579	G	A	0.11	0.0759912	0.0257133	0.05294
	rs34960591	TRPV5	7	142633833	A	G	0.05	0.0553559	0.00281789	0.6087
	rs4236480	TRPV5	7	142626549			0.3				Failed genotyping
	rs4252372	TRPV5	7	142630534	A	G	0.02	0.0248023	0.00317013	0.008667
	rs4252381	TRPV5	7	142629375	A	C	0.08	0.0705706	0.047552	0.6751
	rs4252418	TRPV5	7	142625249	G	A	0.11	0.0401012		3.439e-05	Failed HWE
	rs4252424	TRPV5	7	142624333	A	G	0.2	0.188609	0.020782	0.7225
	rs4252435	TRPV5	7	142622714	A	G	0.11	0.0797987	0.00317013	0.4619
	rs4252499	TRPV5	7	142609749	A	G	0.03	0.0107759	0.000352237	0.1461
	rs4252535	TRPV5	7	142620219	A	G	0.05	0.0487627	0.0130328	0.7678
	rs8176044	TRPV5	7	142639321	G	A	0.36	0.350181	0.00739697	0.7232
	rs4987568	TRPV6	7	142590737	A	G	0.05	0.042147	0.00281789	0.7325
	rs4987582	TRPV6	7	142586822		G	0.03	0	0.00176118	1	Constant
	rs4987617	TRPV6	7	142580495	A	G	0.08	0.0721464	0.000704473	1
	rs4987622	TRPV6	7	142579929	G	A	0.08	0.0750544	0.0130328	0.336
	rs4987652	TRPV6	7	142575383			0.05				Failed genotyping
	rs4987654	TRPV6	7	142575239			0.1				Failed genotyping
	rs4987655	TRPV6	7	142575150	G	A	0.08	0.0730216	0.00176118	0.5489
	rs4987656	TRPV6	7	142575067			0.08				Failed genotyping
	rs4987657	TRPV6	7	142574913	A	G	0.08	0.000722022	0.00457908	1
	rs4987665	TRPV6	7	142573263	A	G	0.08	0.073602	0.144065	1
	rs4987667	TRPV6	7	142572908	G	A	0.08	0.0724063	0.00422684	0.6906
	rs4987668	TRPV6	7	142572649	G	A	0.08	0.0723542	0.00176118	0.6904
	rs4987669	TRPV6	7	142571782			0.08				Failed genotyping
	rs4987682	TRPV6	7	142569596	G	A	0.08	0.0688406	0.0116238	0.8325
	rs4987691	TRPV6	7	142567942	G	A	0.1	0.0811103	0.00986263	0.1009
	rs4987702	TRPV6	7	142576475			0.06				Failed genotyping
	rs4987704	TRPV6	7	142572304			0.1				Failed genotyping
	rs6944571	TRPV6	7	142566163	C	G	0.49	0.494413	0.758366	0.02667	Missing >20%
	rs6951428	TRPV6	7	142595684	A	G	0.05	0.0417076	0.320888	0.4143	Missing >20%
	Intergenic SNPs, associated with vitamin D levels in GWAS (Benjamin, et al. 2007. PMID: 17903293)
	rs10485165	GWAS_VD	6	89112817	A	G	0.16	0.146527	0.00598802	0.107
	rs10507577	GWAS_VD	13	53968091	G	A	0.11	0.117091	0.011976	0.06722
	Genes involved in vitamin D genomic effects
	rs1007971	RXRA	9	137335914	C	G	0.19	0.200077	0.0626981	0.001783
	rs1045570	RXRA	9	137332311	A	C	0.16	0.168596	0.00493131	0.5013
	rs10776909	RXRA	9	137288746	A	G	0.21	0.213512	0.00704473	0.1503
	rs10881582	RXRA	9	137256078	A	G	0.24	0.227273	0.119056	0.05446
	rs10881583	RXRA	9	137267439	G	A	0.25	0.238973	0.00634026	0.01809
	rs11103473	RXRA	9	137287629			0.35				Failed genotyping
	rs11103482	RXRA	9	137287860	G	A	0.11	0.120968	0.0285312	0.3728
	rs11185659	RXRA	9	137243383	A	G	0.19	0.214234	0.00598802	0.523
	rs12006409	RXRA	9	137230369			0.11				Failed genotyping
	rs12339187	RXRA	9	137229327	G	A	0.17	0.173723	0.0257133	0.08985
	rs1536475	RXRA	9	137321156	A	G	0.18	0.163009	0.781261	0.3043	Missing >20%
	rs1805343	RXRA	9	137328286	G	A	0.34	0.326582		2.245e-05	Failed HWE
	rs1805348	RXRA	9	137328442	A	G	0.02	0.0174292	0.0102149	1
	rs1887309	RXRA	9	137308242	G	A	0.3	0.317259	0.0158507	0.3199
	rs3118523	RXRA	9	137335521	G	A	0.17	0.187997	0.00739697	0.00613
	rs3118526	RXRA	9	137337357	A	G	0.11	0.122794	0.019373	0.8015
	rs3118529	RXRA	9	137304915			0.3				Failed genotyping
	rs3118536	RXRA	9	137308462	A	C	0.17	0.176082	0.0228954	0.7793
	rs3118571	RXRA	9	137318178	G	A	0.34	0.359352	0.0274745	0.03911
	rs3132288	RXRA	9	137341498	G	A	0.4	0.401403	0.0302924	0.6922
	rs3132294	RXRA	9	137324120	A	G	0.23	0.252874	0.00140895	0.1563
	rs3132301	RXRA	9	137294030	A	G	0.18	0.200806	0.393096	0.09146	Missing >20%
	rs34312136	RXRA	9	137269456	G	A	0.41	0.392523	0.000704473	0.3117
	rs35079168	RXRA	9	137280939	G	A	0.35	0.362709	0.0172596	0.3819
	rs4240705	RXRA	9	137311400	G	A	0.34	0.372111	0.0746742	0.3418
	rs4842196	RXRA	9	137333228	C	A	0.25	0.25578	0.00951039	0.007192
	rs4917348	RXRA	9	137214145	G	A	0.19	0.153413	0.040155	0.04502
	rs6537944	RXRA	9	137312828	G	A	0.07	0.0831518	0.0126805	1
	rs7038018	RXRA	9	137309959			0.13				Failed genotyping
	rs7039190	RXRA	9	137266704	C	A	0.06	0.0356371	0.00246566	1
	rs748964	RXRA	9	137334089	C	G	0.12	0.176471	0.757309	0.009727	Missing >20%
	rs749759	RXRA	9	137324652	A	G	0.23	0.248911	0.00951039	0.2798
	rs7853934	RXRA	9	137252760			0.2				Failed genotyping
	rs7861779	RXRA	9	137309461	A	G	0.13	0.126755	0.0317013	0.002954
	rs7864987	RXRA	9	137248166	G	A	0.23	0.261905	0.00493131	0.3663
	rs875444	RXRA	9	137295304	G	A	0.39	0.412539	0.0725608	0.2511
	rs881658	RXRA	9	137229855	A	G	0.3	0.312167	0.0542445	0.05426
	rs914853	RXRA	9	137239163	G	A	0.3	0.29924	0.0510743	0.9476
	rs9409929	RXRA	9	137340513	A	G	0.36	0.356979	0.0630504	0.9519
	rs9615	RXRA	9	137331525	G	C	0.05	0.0416667	0.325467	1	Missing >20%
	rs1050673	RXRB	6	33161661	A	G	0	0.285393	0.0517788	0.01562
	rs110662	RXRB	6	33172932			0				Failed genotyping
	rs2072915	RXRB	6	33162082			0				Failed genotyping
	rs2076310	RXRB	6	33166034	G	A	0	0.232466	0.00563579	0.4985
	rs2269346	RXRB	6	33158898	A	G	0	0.0674242	0.0591758	0.6586
	rs2744537	RXRB	6	33162215	A	C	0	0.289474	0.00317013	0.01083
	rs365339	RXRB	6	33172905			0				Failed genotyping
	rs439205	RXRB	6	33173842	A	G	0	0.239421	0.0313491	0.3703
	rs6531	RXRB	6	33163451	G	A	0	0.290602	0.05354	0.0001882
	rs9277935	RXRB	6	33160425	A	C	0	0.196217	0.0352237	0.1005
	rs100537	RXRG	1	165413644	A	G	0.47	0.447729	0.00634026	0.05078
	rs10489745	RXRG	1	165381844	G	A	0.08	0.0833333	0.0232476	0.01154
	rs10800098	RXRG	1	165409095	A	G	0.05	0.0438312	0.133145	0.007109
	rs10918172	RXRG	1	165378992	A	G	0.18	0.179524	0.00317013	0.1002
	rs1467664	RXRG	1	165414933	G	A	0.14	0.141753	0.0295879	0.6569
	rs157861	RXRG	1	165378161			0.21				Failed genotyping
	rs157864	RXRG	1	165383761	A	G	0.16	0.15919	0.00598802	0.006463
	rs157869	RXRG	1	165388948	A	G	0.39	0.401493	0.0524833	0.7332
	rs166899	RXRG	1	165394145	A	G	0.15	0.160779	0.00528355	0.921
	rs17429123	RXRG	1	165368123	G	A	0.18	0.189818	0.0165551	0.3351
	rs1952179	RXRG	1	165404575	A	G	0.06	0.0686556	0.00176118	0.1423
	rs2194899	RXRG	1	165410785	A	G	0.36	0.37941	0.00176118	0.2547
	rs283690	RXRG	1	165370757			0.48				Failed genotyping
	rs283694	RXRG	1	165376685	A	G	0.3	0.310595	0.011976	0.008256
	rs283695	RXRG	1	165376499	A	G	0.43	0.438539	0.00634026	0.2299
	rs283700	RXRG	1	165373146	A	G	0.15	0.142751		4.983e-05	Failed HWE
	rs285480	RXRG	1	165403903	G	A	0.21	0.227469	0.00422684	0.4446
	rs285482	RXRG	1	165410723	A	C	0.28	0.30292	0.0154984	0.3059
	rs3753898	RXRG	1	165416251	G	A	0.2	0.203838	0.00739697	0.08155
	rs3767333	RXRG	1	165372404	A	G	0.22	0.231187	0.00739697	0.01009
	rs3767339	RXRG	1	165378064	A	C	0.33	0.340663	0.0066925	0.4029
	rs3767344	RXRG	1	165391951	G	C	0.47	0.494501	0.0197253	0.7867
	rs41424948	RXRG	1	165413042	A	G	0.41	0.382268	0.000352237	0.02011
	rs466639	RXRG	1	165394882	A	G	0.12	0.12779	0.00211342	0.02963
	rs6669441	RXRG	1	165384712	A	G	0.19	0.200288	0.00281789	0.6759
	rs746332	RXRG	1	165379572	A	C	0.12	0.122302	0.00352237	0.8023
	rs752739	RXRG	1	165412959	A	G	0.23	0.233506	0.0380416	0.08061
	rs10783219	VDR	12	48295488	T	A	0.33	0.339955	0.0693906	1
	rs11168275	VDR	12	48272275	G	A	0.25	0.241303	0.0246566	0.7108
	rs11168287	VDR	12	48285414	G	A	0.49	0.471335	0.0130328	0.1443
	rs11568820	VDR	12	48302545	A	G	0.23	0.205607	0.00281789	0.1392
	rs11574026	VDR	12	48288246	A	G	0.12	0.111871	0.00211342	0.4985
	rs11574032	VDR	12	48278597	A	G	0.06	0.33134		2.631e-58	Failed HWE
	rs11574046	VDR	12	48273814	A	G	0.05	0.0653931	0.0228954	0.8256
	rs11574066	VDR	12	48258635		G	0	0	0.00105671	1	Constant
	rs11574077	VDR	12	48252927	G	A	0.05	0.0562365	0.00457908	0.1977
	rs11574085	VDR	12	48250794	T	A	0.06	0.0529369	0.0123283	0.7906
	rs11574143	VDR	12	48234917			0.12				Failed genotyping
	rs11608702	VDR	12	48228768	T	A	0.33	0.352133	0.00563579	0.4439
	rs12581281	VDR	12	48295133	A	G	0.02	0.0190237	0.000704473	0.396
	rs12721364	VDR	12	48231430	A	G	0.14	0.150719	0.00211342	0.03542
	rs1540339	VDR	12	48257326	A	G	0.37	0.353801	0.766115	0.5553	Missing >20%
	rs1544410	VDR	12	48239835	A	G	0.4	0.416908	0.0102149	0.0683
	rs2107301	VDR	12	48255570	A	G	0.3	0.285714	0.0102149	0.8433
	rs2189480	VDR	12	48263828	A	C	0.36	0.359668	0.0172596	1
	rs2228570	VDR	12	48272895	A	G	0.38	0.382266	0.0228954	0.8633
	rs2238135	VDR	12	48278190	C	G	0.24	0.244396	0.0116238	0.2438
	rs2238136	VDR	12	48277713	A	G	0.27	0.263689	0.00422684	0.1666
	rs2239179	VDR	12	48257766			0.43				Failed genotyping
	rs2239181	VDR	12	48255949	C	A	0.13	0.116522	0.00422684	0.4324
	rs2239182	VDR	12	48255411	A	G	0.49	0.482116	0.0320535	0.008692
	rs2239186	VDR	12	48269410	G	A	0.18	0.189655	0.00246566	0.3836
	rs2254210	VDR	12	48273714	A	G	0.39	0.406597	0.0324058	0.367
	rs2283342	VDR	12	48255859	G	A	0.15	0.143225	0.0232476	0.1837
	rs2853564	VDR	12	48278487	G	A	0.38	0.430678	0.0232476	0.4719
	rs3782905	VDR	12	48266167	C	G	0.33	0.312861	0.00598802	0.6618
	rs3819545	VDR	12	48265006	G	A	0.38	0.386944	0.0179641	0.82
	rs3890734	VDR	12	48289355		G	0.32	0	0.131737	1	Constant
	rs4237855	VDR	12	48287203	G	A	0.36	0.493109		1.303e-54	Failed HWE
	rs4328262	VDR	12	48285648			0.4				Failed genotyping
	rs4760648	VDR	12	48280665			0.44				Failed genotyping
	rs6580639	VDR	12	48232172	G	A	0.03	0.0350687	0.00774921	0.08379
	rs7136534	VDR	12	48294626	A	G	0.29	0.240741	0.799577	0.6333	Missing >20%
	rs7139166	VDR	12	48300334	G	C	0.42	0.425247	0.524128	0.3178	Missing >20%
	rs7299460	VDR	12	48296268	A	G	0.34	0.299281	0.00422684	0.4061
	rs731236	VDR	12	48238757	G	A	0.4	0.402794	0.435012	1	Missing >20%
	rs739837	VDR	12	48238221			0.45				Failed genotyping
	rs7418	VDR	12	48176792	G	A	0.26	0.226842	0.0137372	0.3173
	rs757343	VDR	12	48239675			0.15				Failed genotyping
	rs7970314	VDR	12	48308174	G	A	0.25	0.218331	0.034167	0.03773
	rs7975232	VDR	12	48238837			0.45				Failed genotyping
	rs886441	VDR	12	48262964	G	A	0.19	0.175262	0.0313491	0.3943
	VDR complex co-activators and co-regulators
	rs10513762	ACTL6A	3	179306775	A	G	0.08	0.0724638	0.00986263	0.4253
	rs17770127	ACTL6A	3	179306038	G	A	0	0.00807636		5.374e-05	Failed HWE
	rs2339843	ACTL6A	3	179311981	A	T	0.03	0.0323044	0.000352237	0.3974
	rs9816801	ACTL6A	3	179279381	C	G	0.47	0.444242	0.0151462	0.7847
	rs11247593	ARID1A	1	27052080	A	G	0.25	0.20671	0.00457908	0.624
	rs11247596	ARID1A	1	27093657	G	A	0.23	0.224299	0.00246566	0.4881
	rs12025634	ARID1A	1	26865505	A	G	0.16	0.139468	0.00211342	0.3716
	rs12737946	ARID1A	1	27079894	G	A	0.07	0.0818966	0.000704473	0.5905
	rs12738345	ARID1A	1	27019744	G	A	0.07	0.0748355	0.625925	0.1357	Missing >20%
	rs12752833	ARID1A	1	27073924	A	G	0.07	0.0799712	0.00352237	0.4624
	rs17262006	ARID1A	1	27035103	A	G	0.06	0.0730216	0.00176118	0.04341
	rs4466675	ARID1A	1	27020012	A	G	0.36	0.376012	0.0302924	0.204
	rs6666121	ARID1A	1	27029551	C	A	0.39	0.412084	0.00951039	0.4055
	rs10273731	BAZ1B	7	72932457			0				Failed genotyping
	rs10275549	BAZ1B	7	72914811	A	T	0.2	0.199275	0.0123283	0.006944
	rs1178977	BAZ1B	7	72857049	G	A	0.19	0.179344	0.0390983	0.853
	rs1178979	BAZ1B	7	72856430	G	A	0.19	0.187365	0.000352237	0.4288
	rs11983981	BAZ1B	7	72939341	G	C	0.07	0.400073		3.113e-156	Failed HWE
	rs11983997	BAZ1B	7	72939244	C	G	0.19	0.184571	0.0038746	0.2124
	rs12056034	BAZ1B	7	72878645	G	A	0.11	0.107543	0.0338147	0.5695
	rs17145713	BAZ1B	7	72904810	A	G	0.19	0.184571	0.00317013	0.6553
	rs17145717	BAZ1B	7	72929608	A	G	0.04	0.0681487	0.0172596	1
	rs17145721	BAZ1B	7	72934080	G	A	0.08	0.0729769	0.00493131	0.6942
	rs17400042	BAZ1B	7	72896550	G	A	0.04	0.0320997	0.0496654	0.149
	rs2074755	BAZ1B	7	72877166	G	A	0.11	0.10605	0.0137372	0.7767
	rs2237279	BAZ1B	7	72861849	A	G	0.47	0.46371	0.717506	0.4054	Missing >20%
	rs2353082	BAZ1B	7	72913168	G	C	0.28	0.270419	0.0281789	0.04616
	rs4640941	BAZ1B	7	73245103	G	A	0.28	0.280479	0.0116238	0.2048
	rs6460043	BAZ1B	7	72884188	A	G	0.01	0.00892857	0.0359281	1
	rs714052	BAZ1B	7	72864869	G	A	0.11	0.111513	0.00704473	0.6831
	rs11667234	CARM1	19	11019581	A	C	0.04	0.034842	0.00211342	0.2324
	rs1529711	CARM1	19	11023434	A	G	0.16	0.157038	0.356464	0.5402	Missing >20%
	rs1541596	CARM1	19	10987013			0.48				Failed genotyping
	rs2304089	CARM1	19	11024986			0.29				Failed genotyping
	rs4804543	CARM1	19	10998019	A	G	0.44	0.44694	0.0697429	0.02097
	rs7254708	CARM1	19	11002579	A	G	0.14	0.119355	0.137372	0.4163
	rs892011	CARM1	19	11018403	A	G	0.3	0.290217	0.00880592	0.7941
	rs11668886	CHAF1A	19	4423419	A	G	0.23	0.227862	0.00246566	0.4464
	rs243341	CHAF1A	19	4405106	G	A	0.28	0.274909	0.0126805	0.1045
	rs243352	CHAF1A	19	4412106	A	C	0.48	0.491544	0.0221909	0.2126
	rs243365	CHAF1A	19	4424296	G	A	0.23	0.229326	0.0785488	0.05035
	rs243382	CHAF1A	19	4442529			0.44				Failed genotyping
	rs243383	CHAF1A	19	4442999			0.03				Failed genotyping
	rs243395	CHAF1A	19	4452497			0.28				Failed genotyping
	rs34148381	CHAF1A	19	4409756			0				Failed genotyping
	rs9352	CHAF1A	19	4442336	G	A	0.46	0.460813	0.0257133	0.3573
	rs11076787	CREBBP	16	3852776	A	G	0.21	0.207792	0.0764354	0.6145
	rs1296720	CREBBP	16	3873642	C	A	0.2	0.209025	0.00563579	0.5156
	rs129963	CREBBP	16	3796147	A	G	0.45	0.421481	0.0264178	1
	rs129968	CREBBP	16	3791261	A	G	0.37	0.348518	0.00528355	0.5148
	rs130005	CREBBP	16	3828348	G	A	0.11	0.103774	0.0102149	0.2445
	rs130008	CREBBP	16	3781952		G	0	0	0.00528355	1	Constant
	rs130021	CREBBP	16	3832471	G	A	0.35	0.362056	0.00739697	0.5605
	rs130023	CREBBP	16	3833306	G	A	0.02	0.0333817	0.0116238	0.06168
	rs130024	CREBBP	16	3834316	G	A	0.08	0.0664234	0.0126805	0.1895
	rs17136507	CREBBP	16	3800545			0.11				Failed genotyping
	rs2239316	CREBBP	16	3913995	G	A	0.25	0.248693	0.0426206	0.0674
	rs2239317	CREBBP	16	3920740	G	C	0.11	0.0975877	0.0179641	0.5381
	rs2530890	CREBBP	16	3904546	G	C	0.18	0.186804	0.112364	0.5164
	rs39733	CREBBP	16	3773164	A	G	0.28	0.318874	0.0616414	0.1622
	rs8046065	CREBBP	16	3838298	A	G	0.14	0.122724	0.0112716	0.02352
	rs886528	CREBBP	16	3811556	G	A	0.42	0.42692	0.032758	0.6962
	rs9392	CREBBP	16	3775169	A	G	0.24	0.249267	0.020782	0.7181
	rs1046088	EP300	22	41574383	C	A	0.04	0.0293814	0.316661	0.04561	Missing >20%
	rs12628695	EP300	22	41577964	A	G	0.09	0.0979122	0.00211342	0.7626
	rs20551	EP300	22	41548008	G	A	0.3	0.269798	0.0637548	0.7772
	rs20552	EP300	22	41551039	A	T	0.36	0.361288	0.0943994	0.0003075
	rs4820429	EP300	22	41538111	C	G	0.27	0.272331	0.0109193	0.4544
	rs4822002	EP300	22	41487344	G	A	0.37	0.376265	0.0905248	0.01745
	rs5758222	EP300	22	41486193	G	A	0.33	0.357299	0.0154984	0.1957
	rs9611502	EP300	22	41531236			0.02				Failed genotyping
	rs1005139	HDAC9	7	18703063	A	T	0.23	0.194829	0.0211342	0.4919
	rs10215908	HDAC9	7	18845072	G	A	0.06	0.074874	0.00352237	0.847
	rs10227612	HDAC9	7	19034579	C	A	0.29	0.277056	0.00457908	1
	rs10229062	HDAC9	7	18700490	G	A	0.1	0.0926194	0.00598802	0.1978
	rs10234685	HDAC9	7	18814931			0.06				Failed genotyping
	rs10237366	HDAC9	7	18915559	C	G	0.38	0.38643	0.0066925	0.1727
	rs10245874	HDAC9	7	18968883	G	A	0.18	0.184191	0.00774921	0.8577
	rs10247238	HDAC9	7	18942904	A	C	0.34	0.327128	0.05354	1
	rs10248565	HDAC9	7	18974723	C	A	0.12	0.128373	0.0147939	0.9039
	rs10249700	HDAC9	7	18978611	A	C	0.08	0.0800738	0.0320535	0.7112
	rs10250414	HDAC9	7	18979194	A	G	0.41	0.407815	0.0482564	0.05975
	rs10258269	HDAC9	7	18855915	C	G	0.08	0.107997	0.0412117	0.5697
	rs10259495	HDAC9	7	18725683	G	C	0.07	0.080681	0.025361	0.06456
	rs10261308	HDAC9	7	18839183	C	A	0.03	0.0324108	0.0183163	0.05079
	rs10261942	HDAC9	7	18927303	G	C	0.29	0.287463	0.032758	0.8943
	rs10264011	HDAC9	7	18970232	A	T	0.31	0.270133	0.0845368	0.002838
	rs10269422	HDAC9	7	18854601	A	T	0.34	0.325718	0.0221909	0.05526
	rs10272295	HDAC9	7	18934478	C	A	0.11	0.136667	0.0331103	0.298
	rs10272709	HDAC9	7	18934838	A	G	0.13	0.121234	0.0218387	0.7989
	rs10276613	HDAC9	7	18729827	A	G	0.14	0.16476	0.0623459	0.4217
	rs10278449	HDAC9	7	18931219	G	A	0.15	0.156131	0.0630504	0.02719
	rs10282136	HDAC9	7	18991904	A	G	0.46	0.460161	0.0183163	0.01226
	rs1034805	HDAC9	7	18977653	A	G	0.34	0.322247	0.0274745	0.2373
	rs10486293	HDAC9	7	18635795	A	G	0.24	0.218425	0.0299401	0.1106
	rs10486317	HDAC9	7	18935733	G	A	0.34	0.371452	0.114477	0.04403
	rs10486323	HDAC9	7	18963935	T	A	0.11	0.103829	0.0257133	0.4662
	rs10486327	HDAC9	7	18981897			0.11				Failed genotyping
	rs1089358	HDAC9	7	18641842	G	C	0.11	0.116322	0.433603	0.7342	Missing >20%
	rs1117533	HDAC9	7	18947955	G	A	0.36	0.358186	0.0743219	0.6296
	rs11543651	HDAC9	7	18590659	G	A	0.3	0.332792	0.347658	0.6041	Missing >20%
	rs11762171	HDAC9	7	18633033	G	A	0.09	0.0712209	0.00810144	0.4112
	rs11764116	HDAC9	7	18800413	A	C	0.22	0.19722	0.0514266	0.8625
	rs11764843	HDAC9	7	18935310	A	C	0.36	0.378986	0.116943	0.03877
	rs11767043	HDAC9	7	18979366			0.18				Failed genotyping
	rs1178100	HDAC9	7	18735515			0.28				Failed genotyping
	rs1178114	HDAC9	7	18746435	A	C	0.26	0.269147	0.00598802	0.3394
	rs1178118	HDAC9	7	18751998	G	A	0.18	0.184054	0.0313491	0.1728
	rs1178126	HDAC9	7	18766116			0.03				Failed genotyping
	rs1178127	HDAC9	7	18767343			0.26				Failed genotyping
	rs1178178	HDAC9	7	18799718	A	G	0.18	0.166185	0.00810144	0.9227
	rs11975297	HDAC9	7	18807629			0.05				Failed genotyping
	rs12056282	HDAC9	7	18882203	G	A	0.04	0.0344453	0.00704473	0.07471
	rs12531908	HDAC9	7	18838616	G	A	0.27	0.296667	0.372666	0.6326	Missing >20%
	rs12533489	HDAC9	7	19016933	C	G	0.18	0.145536	0.0711518	0.5102
	rs12535092	HDAC9	7	19013672	A	G	0.24	0.23063	0.00739697	0.1975
	rs12669760	HDAC9	7	18630293	G	C	0.23	0.229839	0.0169074	0.01752
	rs12670036	HDAC9	7	19032243			0.12				Failed genotyping
	rs12699985	HDAC9	7	18854401	G	A	0.28	0.266811	0.00810144	0.8367
	rs12699991	HDAC9	7	18860760	G	A	0.4	0.398262	0.00704473	0.1603
	rs12700003	HDAC9	7	18905866	A	G	0.41	0.407876	0.00457908	0.4038
	rs12700007	HDAC9	7	18920523	T	A	0.28	0.14664		1.412e-11	Failed HWE
	rs13234273	HDAC9	7	18621925	A	G	0.09	0.102878	0.00176118	0.1927
	rs13241157	HDAC9	7	18860014	A	G	0.3	0.277899	0.0154984	0.8929
	rs13246896	HDAC9	7	18843694	T	A	0.26	0.236069	0.0468475	0.2536
	rs13438248	HDAC9	7	18938081	G	A	0.15	0.168045	0.0376893	0.01051
	rs1405618	HDAC9	7	18650086	A	G	0.32	0.312041	0.0218387	0.8995
	rs1624397	HDAC9	7	18680661	C	G	0.23	0.249817	0.0320535	0.9424
	rs1633789	HDAC9	7	18631658	G	A	0.05	0.0464363	0.00317013	0.007777
	rs16872155	HDAC9	7	19017504	G	A	0.36	0.336245	0.0116238	0.3042
	rs17139546	HDAC9	7	18707202	A	G	0.02	0.0160233	0.0116238	0.2954
	rs17140133	HDAC9	7	18886177	A	G	0.03	0.0204741	0.00246566	1
	rs17140138	HDAC9	7	18886618	A	G	0.04	0.0356115	0.0038746	0.6926
	rs17140244	HDAC9	7	18939294	A	C	0.29	0.264813	0.0197253	0.8351
	rs17140251	HDAC9	7	18943707	A	C	0.06	0.0538966	0.0172596	0.5907
	rs17140345	HDAC9	7	18977511	C	A	0.18	0.163524	0.00774921	0.4305
	rs17140423	HDAC9	7	19007884	G	A	0.32	0.294964	0.00176118	0.606
	rs17150238	HDAC9	7	18604337	G	A	0.22	0.315681		2.271e-14	Failed HWE
	rs1726595	HDAC9	7	18625532	A	G	0.48	0.484062	0.0271222	0.3837
	rs1726596	HDAC9	7	18616374	A	G	0.1	0.087908	0.0362804	0.1247
	rs1726597	HDAC9	7	18621630	G	A	0.21	0.211976	0.020782	0.001536
	rs1726610	HDAC9	7	18630208	A	C	0.37	0.364333	0.0154984	0.007335
	rs17349342	HDAC9	7	18815473	C	A	0.49	0.477141	0.0123283	0.2572
	rs17349832	HDAC9	7	18864637	A	G	0.22	0.205283	0.0514266	0.04317
	rs17350355	HDAC9	7	18928503	A	G	0.38	0.365299	0.0317013	0.04512
	rs17350515	HDAC9	7	18941624	A	G	0.38	0.383122	0.112716	0.6341
	rs17432448	HDAC9	7	18548419	G	A	0.37	0.360387	0.0348714	0.5151
	rs17432782	HDAC9	7	18625882			0.05				Failed genotyping
	rs17433095	HDAC9	7	18703751	A	G	0.07	0.0718978	0.0200775	0.416
	rs17433319	HDAC9	7	18747178	A	G	0.11	0.104364	0.0116238	0.7724
	rs17434924	HDAC9	7	18929062			0.07				Failed genotyping
	rs17435661	HDAC9	7	19017368	G	A	0.19	0.0665221	0.00739697	0.1229
	rs2023651	HDAC9	7	18636045	A	G	0	0.217532	0.714336	0.8917	Missing >20%
	rs2051920	HDAC9	7	18989232	A	G	0.24	0.244245	0.00422684	0.02012
	rs2073973	HDAC9	7	18624673	A	G	0.47	0.465818	0.0116238	0.4812
	rs2106506	HDAC9	7	18630523	C	A	0.15	0.171336	0.000704473	0.0235
	rs212669	HDAC9	7	18739564	A	G	0.04	0.0369693	0.0186685	0.4274
	rs2157847	HDAC9	7	18642019	A	G	0.05	0.0472973	0.249031	0.001337	Missing >20%
	rs2158495	HDAC9	7	19021592			0.17				Failed genotyping
	rs2160543	HDAC9	7	18720602	G	A	0.18	0.191954	0.0545967	0.8585
	rs2188320	HDAC9	7	18666901	C	A	0.36	0.343863	0.011976	0.4736
	rs2188495	HDAC9	7	18540461	C	A	0.27	0.250973	0.0739697	0.2352
	rs2189741	HDAC9	7	19015263	A	C	0.21	0.223713	0.00986263	0.5353
	rs2214090	HDAC9	7	18585173	G	A	0.06	0.047046	0.0112716	0.5385
	rs2214850	HDAC9	7	18959138	G	A	0.13	0.13668	0.0651638	0.004362
	rs2240419	HDAC9	7	18975189	A	G	0.24	0.253027	0.362452	0.8539	Missing >20%
	rs2285430	HDAC9	7	18674040	A	C	0.44	0.460558	0.0986263	0.125
	rs2285437	HDAC9	7	18681992	G	C	0.09	0.0934106	0.00704473	0.3395
	rs2285440	HDAC9	7	18698661	C	A	0.06	0.0742754	0.431842	0.4447	Missing >20%
	rs2301949	HDAC9	7	18938958	G	A	0.26	0.232258	0.105319	0.5776
	rs2301950	HDAC9	7	18932510	T	A	0.25	0.260626	0.723142	0.1768	Missing >20%
	rs2389992	HDAC9	7	18937390	G	A	0.35	0.344951	0.214512	0.6433	Missing >20%
	rs2519889	HDAC9	7	18645296			0.46				Failed genotyping
	rs2519890	HDAC9	7	18679534	A	G	0.13	0.150581	0.0123283	0.4013
	rs2520360	HDAC9	7	18821750	G	A	0.18	0.154076	0.0369849	0.6744
	rs2520361	HDAC9	7	18861140	G	A	0.17	0.210016	0.0739697	0.003176
	rs2520362	HDAC9	7	18863899	C	A	0.5	0.483774	0.0422684	0.02795
	rs2520458	HDAC9	7	18622929	C	A	0.38	0.369231	0.0246566	0.4165
	rs2520460	HDAC9	7	18548719	A	G	0.05	0.0473266	0.00739697	0.7654
	rs2526622	HDAC9	7	19044678	G	C	0.45	0.495649	0.0905248	0.5737
	rs2526626	HDAC9	7	19041337	A	G	0.28	0.217892	0.0464952	0.1739
	rs2526633	HDAC9	7	19030751			0.32				Failed genotyping
	rs2528406	HDAC9	7	18986970	A	G	0.15	0.16553	0.0454385	0.8423
	rs2541318	HDAC9	7	18702508	A	G	0.11	0.103249	0.00634026	1
	rs2588621	HDAC9	7	18842091	A	T	0.31	0.305856	0.182811	0.3223
	rs2695028	HDAC9	7	18627486	A	G	0.32	0.30956	0.0524833	0.8467
	rs2695029	HDAC9	7	18626623	A	G	0.46	0.454647	0.0292356	0.07866
	rs2704282	HDAC9	7	18644378	A	G	0.21	0.229827	0.00493131	0.3241
	rs2704284	HDAC9	7	18645628	G	C	0.49	0.513804	0.0598802	0.08568
	rs2704289	HDAC9	7	18579254	A	G	0.27	0.241366	0.0419162	0.0722
	rs2717339	HDAC9	7	18968559	A	C	0.49	0.496231		4.409e-14	Failed HWE
	rs2717349	HDAC9	7	19023736	G	C	0.23	0.248527	0.0232476	0.1461
	rs2717356	HDAC9	7	18975056	C	A	0.18	0.169985	0.0605847	0.169
	rs2853552	HDAC9	7	18980267	A	G	0.29	0.284621	0.0549489	0.1351
	rs2965026	HDAC9	7	19012564	G	A	0.24	0.25174	0.059528	0.184
	rs3213615	HDAC9	7	18633807	G	A	0.31	0.312547	0.0415639	0.4815
	rs3213616	HDAC9	7	18633901			0.19				Failed genotyping
	rs3757718	HDAC9	7	18568627	A	G	0.28	0.278874	0.0158507	0.638
	rs3801983	HDAC9	7	18683672	G	A	0.19	0.201308	0.011976	0.802
	rs3801986	HDAC9	7	18664580	G	A	0.48	0.496703	0.0183163	0.1043
	rs3807917	HDAC9	7	18616914	A	G	0.4	0.39725	0.00845368	0.3693
	rs3807918	HDAC9	7	18615101	C	G	0.12	0.156483	0.0317013	0.9179
	rs3814991	HDAC9	7	18634903	G	A	0.08	0.0816012	0.0693906	0.06082
	rs3852253	HDAC9	7	18866190	G	A	0.06	0.0527656	0.0105671	0.01106
	rs3852257	HDAC9	7	18871692	A	G	0.34	0.34053	0.0598802	0.3914
	rs3864420	HDAC9	7	18768692	G	C	0.03	0.0410072	0.00140895	0.2874
	rs4141042	HDAC9	7	19013256	G	A	0.15	0.129804	0.00774921	0.07273
	rs4141402	HDAC9	7	18681740	A	G	0.08	0.0943125	0.00176118	1
	rs432	HDAC9	7	19038332			0.39				Failed genotyping
	rs4379363	HDAC9	7	18953143	G	A	0.21	0.199156	0.0510743	0.009055
	rs4413678	HDAC9	7	19017705	A	G	0.05	0.0444043	0.00352237	1
	rs4721718	HDAC9	7	18726997	A	C	0.16	0.153676	0.0250088	1
	rs4721721	HDAC9	7	18740164	G	A	0.11	0.116569	0.02677	0.5105
	rs4721722	HDAC9	7	18755646	G	A	0.08	0.0841165	0.226136	0.5484	Missing >20%
	rs4721726	HDAC9	7	18943326	A	G	0.25	0.221491	0.0197253	0.5311
	rs4721732	HDAC9	7	19006961	C	G	0.19	0.204142	0.0299401	0.02378
	rs6461387	HDAC9	7	18898305			0.39				Failed genotyping
	rs6947529	HDAC9	7	18958942	A	C	0.41	0.399492	0.0102149	0.1966
	rs6950376	HDAC9	7	18728485	G	A	0.09	0.0965697	0.0380416	0.1148
	rs6950979	HDAC9	7	18971873			0.19				Failed genotyping
	rs6958814	HDAC9	7	18689386			0.07				Failed genotyping
	rs6959501	HDAC9	7	18915133	G	A	0.1	0.114629	0.0112716	0.2875
	rs6961943	HDAC9	7	18936474	A	G	0.11	0.119532	0.0454385	0.601
	rs6963568	HDAC9	7	18836701	A	G	0.23	0.227552	0.059528	0.7527
	rs6963748	HDAC9	7	18666217	A	G	0.28	0.248359	0.0158507	0.4693
	rs6967021	HDAC9	7	18958533	G	A	0.49	0.496482	0.0894681	0.6548
	rs6972136	HDAC9	7	18959381			0.29				Failed genotyping
	rs6972422	HDAC9	7	18834375	G	A	0.26	0.236272	0.0827756	0.7584
	rs6973029	HDAC9	7	18908850	A	G	0.35	0.351264	0.00528355	0.8136
	rs6974011	HDAC9	7	18838463	C	A	0.38	0.362915	0.00704473	0.5232
	rs6974299	HDAC9	7	18859647	G	A	0.3	0.27672	0.0176118	0.8924
	rs6976460	HDAC9	7	19009661	A	C	0.37	0.371085	0.0176118	0.02815
	rs6979890	HDAC9	7	18693393	G	A	0.2	0.209513	0.00951039	0.6842
	rs706087	HDAC9	7	18713515	G	A	0.18	0.192784	0.011976	0.298
	rs726116	HDAC9	7	18952086	G	A	0.34	0.315872	0.0785488	0.05209
	rs726805	HDAC9	7	18962688	T	A	0.41	0.384187	0.0257133	0.5647
	rs756853	HDAC9	7	18890000	G	A	0.41	0.420364	0.0144417	0.74
	rs7789752	HDAC9	7	18965622	G	A	0.13	0.150759	0.00845368	0.2476
	rs7796078	HDAC9	7	18673238	G	A	0.34	0.322165	0.0211342	0.9011
	rs7798197	HDAC9	7	19037661	G	A	0.21	0.208394	0.00845368	0.5144
	rs7798646	HDAC9	7	18824705	A	G	0.07	0.0673499	0.0169074	0.8286
	rs7806011	HDAC9	7	18939200			0.36				Failed genotyping
	rs7807970	HDAC9	7	19039381	G	C	0.49	0.456855	0.101796	0.5672
	rs7808451	HDAC9	7	19002886	C	A	0.4	0.391078	0.0271222	0.1365
	rs7808698	HDAC9	7	18864031	G	C	0.09	0.0850592	0.0281789	0.07818
	rs801510	HDAC9	7	18665764	G	A	0.38	0.378457	0.0109193	0.5284
	rs801524	HDAC9	7	18706918	A	G	0.18	0.178783	0.0246566	1
	rs801539	HDAC9	7	18671212	C	G	0.09	0.0988414	0.00634026	0.4487
	rs801541	HDAC9	7	18672481	A	T	0.44	0.419922	0.0711518	0.1081
	rs801763	HDAC9	7	18601365	A	G	0.13	0.156455	0.0158507	0.4127
	rs957958	HDAC9	7	18877616	G	A	0.38	0.37694	0.020782	0.7286
	rs968841	HDAC9	7	18656677	A	G	0.1	0.0997046	0.0271222	0.03222
	rs972400	HDAC9	7	18668239			0.21				Failed genotyping
	rs993082	HDAC9	7	19009810	A	G	0.2	0.161213	0.0929905	0.7541
	rs11655550	MED1	17	37610123	G	A	0.21	0.196442	0.011976	0.3066
	rs4533315	MED1	17	37611679			0.41				Failed genotyping
	rs4611492	MED1	17	37616337	G	A	0.08	0.0810409	0.0292356	0.1997
	rs4795357	MED1	17	37569551			0.25				Failed genotyping
	rs4795369	MED1	17	37609120	G	A	0.27	0.28639	0.0140895	0.9475
	rs8076997	MED1	17	37596434	A	G	0.05	0.0454545	0.0116238	0.1986
	rs9646419	MED1	17	37597185	A	G	0.16	0.154157	0.0186685	0.2517
	rs11125744	NCOA1	2	24905927	C	G	0.1	0.106006	0.00774921	1
	rs11125763	NCOA1	2	24974945	A	C	0.1	0.0950988		2.866e-05	Failed HWE
	rs11892043	NCOA1	2	24990082	G	A	0.28	0.26541	0.0165551	0.2146
	rs12105106	NCOA1	2	24834126	A	G	0.09	0.0738766	0.0598802	0.003791
	rs12468225	NCOA1	2	24922359	C	A	0.15	0.157143	0.0961606	0.5239
	rs12474894	NCOA1	2	24799847	G	A	0.18	0.202104	0.00951039	0.9334
	rs12612839	NCOA1	2	24985719	C	A	0.07	0.0519856	0.00598802	0.02824
	rs12713362	NCOA1	2	24875110	C	A	0.3	0.27795	0.0824234	0.08288
	rs13004818	NCOA1	2	24804182	A	C	0.41	0.399319	0.0447341	0.01156
	rs17046434	NCOA1	2	24872463	A	G	0.07	0.0467599	0.0214864	0.007336
	rs17046438	NCOA1	2	24876650	A	G	0.09	0.0880866	0.00457908	0.8675
	rs17046513	NCOA1	2	24964495	C	A	0.04	0.0475096	0.0493131	1
	rs17736503	NCOA1	2	24955312	A	C	0.06	0.0532374	0.00246566	0.7937
	rs17737058	NCOA1	2	24991569			0.22				Failed genotyping
	rs2119115	NCOA1	2	24886781			0.23				Failed genotyping
	rs2120002	NCOA1	2	24836074	G	A	0.46	0.449468		2.187e-07	Failed HWE
	rs3731628	NCOA1	2	24929851	A	T	0.08	0.0660857	0.0105671	0.3783
	rs4665716	NCOA1	2	24943972	G	A	0.07	0.068804	0.00422684	0.08797
	rs6545699	NCOA1	2	24960941			0.1				Failed genotyping
	rs6724282	NCOA1	2	24993672	G	A	0.07	0.0515728	0.0197253	0.007915
	rs744078	NCOA1	2	24934842	C	A	0.2	0.200556	0.0919338	0.02201
	rs749046	NCOA1	2	24815624	G	A	0.19	0.185737		5.596e-06	Failed HWE
	rs7582565	NCOA1	2	24859867	C	A	0.03	0.0282814	0.00774921	0.09212
	rs7593430	NCOA1	2	24933689			0.1				Failed genotyping
	rs76252869	NCOA1	2	24817904			0				Failed genotyping
	rs995648	NCOA1	2	24810366	A	G	0.1	0.0894454	0.198662	0.005443
	rs10087049	NCOA2	8	71106304	G	A	0.39	0.39048	0.0817189	0.02257
	rs10504476	NCOA2	8	71267629	A	G	0.12	0.105634		2.108e-05	Failed HWE
	rs11995219	NCOA2	8	71032197			0				Failed genotyping
	rs12674927	NCOA2	8	71014691	G	A	0.27	0.278065	0.0366326	1
	rs1380897	NCOA2	8	71211891	G	A	0.12	0.112771	0.0383938	0.2174
	rs1460680	NCOA2	8	71163768	G	A	0.06	0.062635	0.00281789	0.1075
	rs1531362	NCOA2	8	71153195	A	G	0.08	0.0751634	0.00951039	0.6963
	rs16936754	NCOA2	8	71048959	A	C	0.07	0.0622697	0.0221909	0.3562
	rs16936837	NCOA2	8	71141432	G	A	0.05	0.0491329	0.00457908	0.04333
	rs16936872	NCOA2	8	71192380	A	G	0.08	0.0563464	0.421275	0.5102	Missing >20%
	rs17676138	NCOA2	8	71134661	C	A	0.15	0.144174	0.0197253	0.8261
	rs17676564	NCOA2	8	71158116			0.05				Failed genotyping
	rs17748400	NCOA2	8	71109012	G	A	0.17	0.190703	0.0172596	0.5403
	rs17748913	NCOA2	8	71139576	G	A	0.11	0.109145	0.0264178	0.3265
	rs2228591	NCOA2	8	71039118	C	G	0.06	0.0566378	0.00281789	0.4437
	rs2926702	NCOA2	8	71167994	G	A	0.15	0.128234	0.0281789	0.0001328
	rs2926703	NCOA2	8	71166994	G	A	0.18	0.172911	0.00317013	0.1109
	rs3812429	NCOA2	8	71101719	G	A	0.14	0.123277	0.059528	0.1234
	rs3812430	NCOA2	8	71050372			0.14				Failed genotyping
	rs4545135	NCOA2	8	71038715			0.26				Failed genotyping
	rs4623463	NCOA2	8	71122418	G	A	0.44	0.403905	0.0563579	0.08499
	rs4738077	NCOA2	8	71126538	G	A	0	0.260172	0.0771398	0.6112
	rs4738078	NCOA2	8	71127554	G	A	0.19	0.178118	0.0352237	0.004945
	rs4738080	NCOA2	8	71129813	A	G	0.09	0.0656827	0.0257133	0.3699
	rs6472520	NCOA2	8	71273315	G	A	0.26	0.234066	0.0204297	0.3648
	rs11696591	NCOA3	20	46144379			0.27				Failed genotyping
	rs11700063	NCOA3	20	46153148			0.27				Failed genotyping
	rs13043637	NCOA3	20	46125266	G	A	0.42	0.428055	0.00598802	0.3796
	rs1537306	NCOA3	20	46131798	C	G	0.08	0.087473	0.00457908	1
	rs2076546	NCOA3	20	46268493	G	A	0.08	0.0872845	0.00246566	0.8661
	rs2143491	NCOA3	20	46228667	A	G	0.35	0.353249	0.0355759	1
	rs2230782	NCOA3	20	46264888	G	C	0.12	0.0929003	0.0563579	1
	rs2425941	NCOA3	20	46157389	A	C	0.47	0.448755	0.0179641	0.1261
	rs3092608	NCOA3	20	46175933	G	A	0.42	0.407876	0.00634026	0.4363
	rs427967	NCOA3	20	46274185	A	G	0.19	0.168449	0.0556534	0.6215
	rs4810648	NCOA3	20	46267950	G	A	0.07	0.0744681	0.810497	0.1881	Missing >20%
	rs6066409	NCOA3	20	46239865	C	G	0.28	0.265873	0.00598802	0.5358
	rs6094752	NCOA3	20	46256424	A	G	0.03	0.0514553	0.323706	0.7354	Missing >20%
	rs6125042	NCOA3	20	46186327	G	A	0.12	0.152224	0.0852413	1
	rs8114934	NCOA3	20	46207669	G	A	0.12	0.0965293	0.00774921	0.6457
	rs10223441	NCOA7	6	126228395	G	C	0.31	0.305536	0.00211342	0.0229
	rs10447437	NCOA7	6	126258892	G	A	0.46	0.433783		2.511e-08	Failed HWE
	rs10782230	NCOA7	6	126228512	A	G	0.5	0.490551	0.119056	0.002851
	rs1145989	NCOA7	6	126133041		G	0	0	0.00140895	1	Constant
	rs11756122	NCOA7	6	126225883	G	A	0	0.0225904	0.771398	0.008835	Missing >20%
	rs11757529	NCOA7	6	126235387	G	C	0	0.0108382	0.0038746	0.0003908
	rs11965647	NCOA7	6	126262030	A	G	0.08	0.0708633	0.00176118	0.4114
	rs11967627	NCOA7	6	126122564	G	A	0.11	0.112691	0.0176118	0.8923
	rs12201564	NCOA7	6	126101472	C	G	0.04	0.0577889	0.00176118	0.8043
	rs12206695	NCOA7	6	126255547	A	G	0.46	0.477635	0.0496654	0.0001739
	rs1268087	NCOA7	6	126113822	A	G	0.1	0.096519	0.0912293	0.423
	rs13205456	NCOA7	6	126183420	C	G	0	0.00075188	0.0436774	0.0003761
	rs1407592	NCOA7	6	126235316	G	A	0.03	0.0342262	0.0250088	0.6669
	rs1567	NCOA7	6	126249914	C	A	0.12	0.11913		1.603e-05	Failed HWE
	rs17053599	NCOA7	6	126158257	G	C	0.01	0.0077951		4.056e-05	Failed HWE
	rs17053617	NCOA7	6	126186474	C	G	0.12	0.12481		2.097e-32	Failed HWE
	rs17053695	NCOA7	6	126254166	A	G	0	0.000718907	0.00140895	1
	rs17292488	NCOA7	6	126252633	A	G	0.34	0.339898	0.0151462	0.009647
	rs1739384	NCOA7	6	126099246	C	A	0.41	0.413915	0.101796	0.4882
	rs17708107	NCOA7	6	126163599	G	A	0.1	0.100446	0.0274745	0.09792
	rs17745584	NCOA7	6	126196142	G	A	0.12	0.114766	0.0140895	0.2866
	rs17751311	NCOA7	6	126207186			0.1				Failed genotyping
	rs1777206	NCOA7	6	126104820	G	A	0	0.00546249		3.602e-06	Failed HWE
	rs481233	NCOA7	6	126165465	G	A	0.09	0.0883514		7.976e-06	Failed HWE
	rs4897161	NCOA7	6	126261593	A	G	0.49	0.481879	0.0281789	0.1569
	rs490361	NCOA7	6	126153253	G	A	0.3	0.295888	0.0271222	0.1346
	rs529858	NCOA7	6	126137924	A	C	0.02	0.0241877	0.00457908	1
	rs549438	NCOA7	6	126134936	G	A	0.3	0.310022	0.0066925	0.03827
	rs579477	NCOA7	6	126135893	G	C	0.37	0.37971	0.00915815	1
	rs614031	NCOA7	6	126165720	A	C	0.42	0.413994	0.0123283	0.6165
	rs6919947	NCOA7	6	126210395	A	C	0.48	0.492625	0.0260655	0.03914
	rs6935780	NCOA7	6	126204333	G	C	0.29	0.300591	0.0257133	0.04505
	rs715880	NCOA7	6	126238310	G	A	0.43	0.436317	0.0105671	0.05512
	rs7743352	NCOA7	6	126141570	G	A	0.01	0.00936599	0.00281789	0.005513
	rs9375411	NCOA7	6	126116953	G	A	0.5	0.483008	0.00704473	0.0525
	rs9385388	NCOA7	6	126215296	A	G	0.4	0.437702	0.114477	0.06439
	rs9401850	NCOA7	6	126151000	C	A	0.39	0.386164	0.0172596	0.1707
	rs9401851	NCOA7	6	126181956	G	A	0.49	0.47883	0.0676294	0.3738
	rs9401855	NCOA7	6	126232063			0.39				Failed genotyping
	rs9491509	NCOA7	6	126155989			0				Failed genotyping
	rs9491511	NCOA7	6	126157039	A	G	0	0.00182882	0.0176118	0.003657
	rs9491517	NCOA7	6	126176690			0.01				Failed genotyping
	rs9491528	NCOA7	6	126208049			0.01				Failed genotyping
	rs9491534	NCOA7	6	126239017	G	A	0.12	0.122578	0.0359281	0.01043
	rs1073093	NCOR1	17	15963063			0.03				Failed genotyping
	rs1079533	NCOR1	17	15950198	G	A	0.47	0.450945	0.0126805	0.3837
	rs11657857	NCOR1	17	15959537	A	G	0.16	0.134155	0.00739697	0.7293
	rs12942295	NCOR1	17	15973844	A	T	0.47	0.446652	0.0183163	0.3805
	rs16959544	NCOR1	17	16058348	G	A	0.03	0.0244428	0.00140895	0.1963
	rs178797	NCOR1	17	16119054	G	A	0.48	0.446288	0.0884114	0.5701
	rs178798	NCOR1	17	16117359			0.47				Failed genotyping
	rs178831	NCOR1	17	16080849	A	G	0.43	0.456303	0.0781965	0.05686
	rs2285580	NCOR1	17	16005187	A	G	0.43	0.429145	0.0147939	0.2705
	rs7207463	NCOR1	17	16004259	A	G	0.43	0.428251	0.205706	0.01712	Missing >20%
	rs10773085	NCOR2	12	124853051	A	G	0.2	0.206263	0.00457908	0.6819
	rs10773086	NCOR2	12	124859244			0.11				Failed genotyping
	rs10846661	NCOR2	12	124844124	C	G	0.06	0.0558867	0.0419162	1
	rs10846666	NCOR2	12	124884353			0.19				Failed genotyping
	rs10846670	NCOR2	12	124890231	G	A	0.47	0.462875	0.104614	0.1752
	rs10846681	NCOR2	12	125003705	A	G	0.17	0.180596	0.0109193	0.9276
	rs11057590	NCOR2	12	124843999	G	A	0.07	0.0612319	0.00528355	0.1635
	rs11057637	NCOR2	12	124975312	A	G	0.1	0.0967626	0.00528355	0.5382
	rs11057642	NCOR2	12	124989560	A	G	0.23	0.210526	0.00880592	0.3323
	rs11057665	NCOR2	12	125029570	A	G	0.47	0.483953	0.0116238	0.7459
	rs1147289	NCOR2	12	124970066	A	G	0.1	0.130152	0.00845368	0.7212
	rs11608551	NCOR2	12	124995394	A	G	0.06	0.0502874	0.00140895	1
	rs11610540	NCOR2	12	125003871	A	G	0.23	0.217049	0.549841	0.1474	Missing >20%
	rs11831370	NCOR2	12	124844921	G	A	0.45	0.416484	0.0369849	0.0001504
	rs11837649	NCOR2	12	124850168	G	A	0.15	0.131022		2.654e-12	Failed HWE
	rs12321007	NCOR2	12	124883101	A	G	0.33	0.344551	0.104262	0.0002128
	rs12367963	NCOR2	12	124815504	A	G	0.08	0.0817723	0.00246566	0.5896
	rs12370545	NCOR2	12	125009074	A	G	0.21	0.208843	0.00176118	0.3731
	rs1242999	NCOR2	12	124984488			0.31				Failed genotyping
	rs1243000	NCOR2	12	124984341	C	A	0.33	0.335667	0.0531877	0.9515
	rs1243733	NCOR2	12	124956552	A	G	0.08	0.0923796	0.00246566	0.1983
	rs1243888	NCOR2	12	124930214	G	A	0.16	0.104614		2.358e-16	Failed HWE
	rs1244058	NCOR2	12	124887710	A	G	0.14	0.136364	0.0038746	0.6477
	rs1244061	NCOR2	12	124833303	A	G	0.4	0.410637	0.0123283	0.4044
	rs1244063	NCOR2	12	124832606	A	G	0.14	0.144452	0.00281789	0.5875
	rs1244067	NCOR2	12	124846561	A	G	0.07	0.0636233	0.00211342	0.1696
	rs1244092	NCOR2	12	124911470	A	G	0.07	0.0729691	0.00176118	0.8417
	rs1244096	NCOR2	12	124915091	A	G	0.08	0.0936599	0.00457908	1
	rs12578256	NCOR2	12	124802480	A	T	0.16	0.172794	0.0250088	0.5072
	rs12582168	NCOR2	12	124894184	G	A	0.23	0.213862	0.0394505	0.3308
	rs1263991	NCOR2	12	124844986	G	A	0.18	0.193439	0.0443818	0.03426
	rs1263992	NCOR2	12	124829234	G	A	0.27	0.269053		7.85e-05	Failed HWE
	rs1268891	NCOR2	12	124867996	A	C	0.25	0.253634	0.0109193	1
	rs12708369	NCOR2	12	124875577	A	G	0.41	0.380574	0.0577668	0.06192
	rs12819167	NCOR2	12	124873633	C	G	0.26	0.22032		1.311e-07	Failed HWE
	rs12821657	NCOR2	12	125005343	A	G	0.21	0.197909	0.0419162	0.3895
	rs1702322	NCOR2	12	124922325	G	A	0.21	0.223381	0.00176118	1
	rs1702324	NCOR2	12	124919824	G	A	0.13	0.117605	0.00352237	0.5167
	rs1702335	NCOR2	12	124879836			0.03				Failed genotyping
	rs1702339	NCOR2	12	124902199	A	G	0.15	0.15319	0.0436774	0.8336
	rs1794942	NCOR2	12	124957153	A	G	0.1	0.121767	0.00176118	0.2604
	rs1794973	NCOR2	12	124825592	G	A	0.39	0.402466	0.00880592	0.8666
	rs2048108	NCOR2	12	124850666	G	A	0.47	0.497821	0.00810144	0.4835
	rs2063114	NCOR2	12	124882243	A	G	0.16	0.140959	0.0232476	0.5003
	rs2229840	NCOR2	12	124826462			0.16				Failed genotyping
	rs2229842	NCOR2	12	124821696			0.13				Failed genotyping
	rs2230944	NCOR2	12	124821413			0.05				Failed genotyping
	rs2272368	NCOR2	12	124811855	G	A	0.14	0.119099	0.0186685	0.3683
	rs2293515	NCOR2	12	124908813	G	A	0.26	0.275687	0.00880592	0.1783
	rs2342920	NCOR2	12	124885829	A	G	0.35	0.317621	0.00880592	0.535
	rs2342922	NCOR2	12	124886690	A	G	0.46	0.501452	0.00810144	0.1778
	rs2342923	NCOR2	12	124944434	G	A	0.16	0.348032		4.221e-117	Failed HWE
	rs2342924	NCOR2	12	124973786	G	A	0.29	0.284066	0.00528355	0.1132
	rs3741515	NCOR2	12	124862769			0.07				Failed genotyping
	rs3759108	NCOR2	12	124982657	A	G	0.1	0.0987743	0.00422684	0.2256
	rs3782274	NCOR2	12	124935029	G	A	0.11	0.11602	0.00211342	0.1894
	rs4765147	NCOR2	12	124857274	G	A	0.5	0.484281	0.0500176	0.9128
	rs4765151	NCOR2	12	124982862	C	A	0.2	0.22554	0.00176118	1
	rs4765540	NCOR2	12	124799642	G	A	0.22	0.223589	0.00739697	0.6984
	rs4765543	NCOR2	12	124801683			0.33				Failed genotyping
	rs4765544	NCOR2	12	124802638	G	A	0.44	0.451334	0.0038746	1
	rs701032	NCOR2	12	125018431	G	A	0.23	0.250903	0.00422684	0.5682
	rs701034	NCOR2	12	125006162	A	G	0.36	0.347433	0.013385	0.4769
	rs701036	NCOR2	12	125005483			0.11				Failed genotyping
	rs701038	NCOR2	12	125005128	G	A	0.2	0.23318	0.0503698	0.2798
	rs701039	NCOR2	12	125004362	G	A	0.22	0.170099	0.0707996	0.007978
	rs701043	NCOR2	12	124996220	A	G	0.22	0.205946	0.00915815	1
	rs7304356	NCOR2	12	124998180	C	A	0.15	0.152597	0.00422684	0.6789
	rs747443	NCOR2	12	124968349	A	G	0.28	0.307164	0.00704473	0.9496
	rs7961196	NCOR2	12	124856618	G	A	0.34	0.296825	0.336034	1	Missing >20%
	rs7963151	NCOR2	12	124861726	G	A	0.12	0.1347	0.0172596	1
	rs7967845	NCOR2	12	124863560			0.47				Failed genotyping
	rs7975419	NCOR2	12	124844581			0.34				Failed genotyping
	rs7976774	NCOR2	12	124897448	G	A	0.44	0.449047	0.0246566	0.8696
	rs7980125	NCOR2	12	124927970	G	A	0.32	0.310655	0.00211342	0.9004
	rs837466	NCOR2	12	125010447			0.2				Failed genotyping
	rs837480	NCOR2	12	125029792	G	A	0.3	0.286054		1.455e-07	Failed HWE
	rs837935	NCOR2	12	124990055	G	A	0.34	0.3213	0.00563579	0.5793
	rs837948	NCOR2	12	125002525	A	G	0.3	0.322003	0.0257133	0.8044
	rs864492	NCOR2	12	125009384	A	G	0.28	0.315098	0.0169074	0.3174
	rs872225	NCOR2	12	124979789			0.18				Failed genotyping
	rs906300	NCOR2	12	124869933	C	G	0.21	0.217425	0.117647	0.05795
	rs906302	NCOR2	12	124850457	G	C	0.05	0.0514759	0.00317013	0.1746
	rs906304	NCOR2	12	124926143	A	G	0.13	0.129697	0.00634026	0.04243
	rs967500	NCOR2	12	124936366	G	A	0.4	0.422692	0.38429	0.9456	Missing >20%
	rs10510499	PCAF/KAT2B	3	20195050	G	A	0.09	0.0723341	0.0288834	0.8394
	rs11128934	PCAF/KAT2B	3	20122315	G	A	0.28	0.262611	0.0317013	0.07848
	rs11715447	PCAF/KAT2B	3	20140129	C	A	0.14	0.142651	0.00281789	0.1526
	rs11923928	PCAF/KAT2B	3	20152772	A	G	0.21	0.212482	0.00563579	1
	rs12631457	PCAF/KAT2B	3	20157675			0.08				Failed genotyping
	rs12636078	PCAF/KAT2B	3	20105673	A	G	0.32	0.31441	0.0126805	0.5736
	rs12639078	PCAF/KAT2B	3	20079878			0.29				Failed genotyping
	rs1610186	PCAF/KAT2B	3	20108644	C	A	0.36	0.339658	0.0366326	0.466
	rs17626938	PCAF/KAT2B	3	20080132	G	A	0.12	0.0985348	0.0190208	0.2835
	rs17678713	PCAF/KAT2B	3	20192769			0.14				Failed genotyping
	rs17796904	PCAF/KAT2B	3	20121349	A	G	0.11	0.0975702	0.0531877	0.8753
	rs17797343	PCAF/KAT2B	3	20159193			0.07				Failed genotyping
	rs17797581	PCAF/KAT2B	3	20174396	A	G	0.17	0.13935	0.0038746	0.7375
	rs1915919	PCAF/KAT2B	3	20083881	A	G	0.4	0.414379	0.00634026	0.2679
	rs2292228	PCAF/KAT2B	3	20196923			0.16				Failed genotyping
	rs2365794	PCAF/KAT2B	3	20156302	A	G	0.39	0.429779	0.0232476	0.8682
	rs2623074	PCAF/KAT2B	3	20077414	A	G	0.11	0.102878	0.00281789	0.1438
	rs2686314	PCAF/KAT2B	3	20188074			0.16				Failed genotyping
	rs2686317	PCAF/KAT2B	3	20187181	A	G	0.25	0.265879	0.0271222	0.08194
	rs2929401	PCAF/KAT2B	3	20096735	A	G	0.42	0.388286	0.00810144	0.7341
	rs2929402	PCAF/KAT2B	3	20096110	A	G	0.34	0.354288	0.0116238	0.03927
	rs2929404	PCAF/KAT2B	3	20094566	A	G	0.15	0.174855	0.0066925	0.4571
	rs2929408	PCAF/KAT2B	3	20082969	A	C	0.18	0.1776	0.603029	0.3409	Missing >20%
	rs2948083	PCAF/KAT2B	3	20096973	G	A	0.1	0.0830325	0.00563579	0.5951
	rs2948089	PCAF/KAT2B	3	20072387	T	A	0.12	0.135463	0.355055	0.7766	Missing >20%
	rs2948097	PCAF/KAT2B	3	20105426	A	G	0.22	0.231241	0.00528355	0.7055
	rs3021408	PCAF/KAT2B	3	20113830	A	G	0.4	0.397547	0.0038746	0.2866
	rs3762631	PCAF/KAT2B	3	20181445			0.04				Failed genotyping
	rs3804562	PCAF/KAT2B	3	20181028	A	G	0.12	0.124135	0.0725608	0.7986
	rs3804563	PCAF/KAT2B	3	20182446	G	C	0.28	0.27786	0.0225431	0.199
	rs3804570	PCAF/KAT2B	3	20192055	T	A	0.23	0.235581	0.0482564	0.06858
	rs4020098	PCAF/KAT2B	3	20129648	A	C	0.37	0.341952	0.0126805	0.5487
	rs4858765	PCAF/KAT2B	3	20143586			0.15				Failed genotyping
	rs4858767	PCAF/KAT2B	3	20166937	G	C	0.34	0.462991		2.447e-136	Failed HWE
	rs6550373	PCAF/KAT2B	3	20195962	A	G	0.31	0.32264	0.0239521	0.3512
	rs6550374	PCAF/KAT2B	3	20196040			0.49				Failed genotyping
	rs6765791	PCAF/KAT2B	3	20114820	C	G	0.47	0.462094	0.00563579	0.094
	rs6806287	PCAF/KAT2B	3	20085199	G	A	0.23	0.21249	0.0619937	0.006481
	rs6808352	PCAF/KAT2B	3	20090908			0.33				Failed genotyping
	rs7617840	PCAF/KAT2B	3	20162216	A	C	0.44	0.421726	0.019373	1
	rs7627847	PCAF/KAT2B	3	20107401	A	G	0.44	0.410555	0.229306	1	Missing >20%
	rs7628915	PCAF/KAT2B	3	20198326	A	C	0.38	0.394945	0.0852413	0.2395
	rs977162	PCAF/KAT2B	3	20191506	A	G	0.24	0.214286	0.0116238	1
	rs9819739	PCAF/KAT2B	3	20140760	A	G	0.21	0.205286	0.00634026	0.5635
	rs9829896	PCAF/KAT2B	3	20177472	C	A	0.35	0.353791	0.00704473	0.7689
	rs10415880	PRMT1	19	50189156	A	G	0.34	0.309384	0.0225431	0.7999
	rs1075453	PRMT1	19	50194399	C	G	0.41	0.379422	0.00634026	0.3921
	rs3745469	PRMT1	19	50177171	A	G	0.09	0.0994215	0.0066925	0.5469
	rs3816047	PRMT1	19	50187111			0.17				Failed genotyping
	rs8109314	PRMT1	19	50182697			0.3				Failed genotyping
	rs975484	PRMT1	19	50180266	C	G	0.26	0.25642	0.02677	0.9435
	rs2296212	SMARCA2	9	2191309	C	G	0.1	0.106545	0.0123283	0.4788
	rs12232780	SMARCA4	19	11132080	A	G	0.31	0.307359	0.00281789	0.3773
	rs12610693	SMARCA4	19	11139636	A	C	0.37	0.343547	0.0038746	0.7209
	rs12983316	SMARCA4	19	11114352	G	A	0.16	0.1365	0.0376893	0.01037
	rs13345127	SMARCA4	19	11116266	A	G	0.09	0.125181	0.00915815	0.2688
	rs17001073	SMARCA4	19	11101993			0.04				Failed genotyping
	rs17001078	SMARCA4	19	11113651			0.11				Failed genotyping
	rs17001095	SMARCA4	19	11133272	G	A	0.35	0.347873	0.0038746	0.8592
	rs2072382	SMARCA4	19	11152650	A	G	0.05	0.0350941	0.00563579	0.6841
	rs2163800	SMARCA4	19	11075706	G	A	0.41	0.419778	0.10391	0.3255
	rs2421198	SMARCA4	19	11164968			0.21				Failed genotyping
	rs28997582	SMARCA4	19	11145691	A	G	0.07	0.061038	0.0218387	0.6343
	rs3786721	SMARCA4	19	11146499	A	G	0.46	0.433818	0.0123283	1
	rs3786724	SMARCA4	19	11166791	G	A	0.06	0.0777538	0.00317013	0.0575
	rs4300767	SMARCA4	19	11163689			0.12				Failed genotyping
	rs6511718	SMARCA4	19	11164781	G	A	0.29	0.283864	0.0376893	0.5924
	rs7275	SMARCA4	19	11170839	G	A	0.29	0.286134	0.0176118	0.3531
	rs11711725	SMARCC1	3	47650995			0				Failed genotyping
	rs11714840	SMARCC1	3	47747099	C	G	0.33	0.346294	0.011976	0.9525
	rs2291903	SMARCC1	3	47717626	A	C	0.06	0.0632772	0.0200775	0.3607
	rs3755637	SMARCC1	3	47622210	A	G	0.33	0.326136	0.0637548	0.7072
	rs3772406	SMARCC1	3	47629793			0				Failed genotyping
	rs4858843	SMARCC1	3	47681881	G	A	0.32	0.297177	0.032758	0.3965
	rs5016899	SMARCC1	3	47822847	C	A	0.05	0.0682881	0.24093	0.4717	Missing >20%
	rs11169270	SMARCD1	12	50483032			0.33				Failed genotyping
	rs3782323	SMARCD1	12	50482921	A	G	0.22	0.213925	0.00493131	0.8106
	rs706794	SMARCD1	12	50476158	C	A	0.34	0.359738	0.011976	0.64
	rs836177	SMARCD1	12	50491821	G	A	0.44	0.0938628	0.00528355	0.4275
	rs11651005	SMARCE1	17	38779784	A	G	0.05	0.000360231	0.00352237
	rs11654834	SMARCE1	17	38788348	G	A	0.47	0.451389	0.0648116	0.2388
	rs11659024	SMARCE1	17	38775805	A	G	0.48	0.498196	0.0038746	0.6676
	rs757411	SMARCE1	17	38775150	G	A	0.4	0.386594	0.00810144	0.9097
	rs757412	SMARCE1	17	38784927	A	G	0.12	0.10235	0.0545967	0.5473
	rs8068721	SMARCE1	17	38813824	G	A	0.34	0.383149	0.407538	0.2658	Missing >20%
	rs114763	SNW1	14	78197365			0.49				Failed genotyping
	rs11621593	SNW1	14	78224205	A	G	0.2	0.168375	0.0154984	0.3861
	rs11624704	SNW1	14	78786077	C	A	0.14	0.135894	0.0281789	0.3543
	rs176978	SNW1	14	78195782	A	G	0.11	0.105818	0.0130328	0.3935
	rs17752640	SNW1	14	78199748	G	A	0.07	0.0612245	0.0183163	0.1616
	rs17752707	SNW1	14	78222798	G	A	0.05	0.0502168	0.00528355	0.006031
	rs17825620	SNW1	14	78184661	C	A	0.24	0.217198	0.0260655	0.1088
	rs4346144	SNW1	14	78219144	A	G	0.09	0.0919414	0.019373	0.000116
	rs4903633	SNW1	14	78187451	A	C	0.1	0.0779985	0.0190208	1
	rs7145979	SNW1	14	78185575	C	A	0.35	0.411938	0.0204297	0.7369
	rs7151685	SNW1	14	78225569	G	A	0.41	0.386447	0.0200775	0.1894
	rs10138699	SUPT16H	14	21831052	A	G	0.09	0.0771513	0.0271222	1
	rs11624716	SUPT16H	14	21856080	A	G	0.09	0.0844815	0.00880592	1
	rs17197086	SUPT16H	14	21832776	A	G	0.12	0.110145	0.00880592	0.0534
	rs17197093	SUPT16H	14	21832942	G	C	0.08	0.0962733	0.318774	1	Missing >20%
	rs3736824	SUPT16H	14	21821821	C	A	0.41	0.432922	0.00739697	0.7421
	rs3762158	SUPT16H	14	21829129	C	G	0.07	0.061915	0.00352237	0.8154
	rs7161723	SUPT16H	14	21850079	T	A	0.09	0.087146	0.00986263	0.1263
	rs8021793	SUPT16H	14	21835948	G	C	0.02	0.0267008	0.0183163	0.2495
	rs1001647	TOP2B	3	25654677	G	A	0.2	0.194193	0.0450863	0.3804
	rs1369601	TOP2B	3	25707449			0.17				Failed genotyping
	rs1435700	TOP2B	3	25709119			0.17				Failed genotyping
	rs1561033	TOP2B	3	25664830	A	G	0.07	0.0741959	0.0162029	0.843
	rs17527352	TOP2B	3	25657323	A	C	0.17	0.159282	0.0545967	0.0493
	rs2037860	TOP2B	3	25681432	A	C	0.13	0.120102	0.00915815	0.2012
	rs7621736	TOP2B	3	25640465	G	C	0.11	0.0875684	0.0665727	1
	rs7638216	TOP2B	3	25696866	G	C	0.29	0.28997	0.0528355	0.01367
	rs1051771	TSC2	16	2138584	C	G	0.1	0.0981818	0.0162029	0.8786
	rs13335638	TSC2	16	2136624			0.2				Failed genotyping
	rs17134783	TSC2	16	2116980			0.04				Failed genotyping
	rs1748	TSC2	16	2138269	G	A	0.18	0.185332	0.00810144	0.8587
	rs17596071	TSC2	16	2128728	A	G	0.01	0.0199531	0.422332	0.2853	Missing >20%
	rs17654678	TSC2	16	2114644			0.11				Failed genotyping
	rs1800715	TSC2	16	2125937			0.1				Failed genotyping
	rs1800720	TSC2	16	2105400	A	G	0.1	0.104317	0.00246566	0.6663
	rs2073636	TSC2	16	2105055	A	G	0.42	0.380246	0.00810144	0.3922
	rs2516734	TSC2	16	2105335			0.14				Failed genotyping
	rs30259	TSC2	16	2133901	A	G	0.07	0.0877729	0.194435	0.1964
	rs3087631	TSC2	16	2139127	T	A	0.2	0.194853	0.020782	0.3426
	rs7187438	TSC2	16	2120402			0.37				Failed genotyping
	rs8059880	TSC2	16	2101591	G	A	0.08	0.0733382	0.0112716	0.3187
	rs9928737	TSC2	16	2132731	A	G	0.19	0.176749	0.0126805	0.9263
	Genes responsive to vitamin D
	TGF-beta signaling
	rs1979855	BMP2	20	6747607	G	A	0.2	0.181259	0.00704473	0.5256
	rs235770	BMP2	20	6761765	A	G	0.38	0.385145	0.0563579	0.7259
	rs3178250	BMP2	20	6760201	G	A	0.22	0.222222	0.00422684	0.3124
	rs4813802	BMP2	20	6699595	C	A	0.32	0.326545	0.0126805	0.5816
	rs961253	BMP2	20	6404281	A	C	0.36	0.346182	0.0288834	0.5089
	rs17563	BMP4	14	54417522	A	G	0.45	0.439383	0.020782	0.8258
	rs4444235	BMP4	14	54410919			0.49				Failed genotyping
	rs10405768	RHPN2	19	33507781			0.44				Failed genotyping
	rs10409247	RHPN2	19	33511774	G	A	0.19	0.000718391	0.000704473	1
	rs10410414	RHPN2	19	33499071			0.2				Failed genotyping
	rs10411210	RHPN2	19	33532300	A	G	0.1	0.103237	0.00140895	0.8854
	rs10425796	RHPN2	19	33500092			0.45				Failed genotyping
	rs11084690	RHPN2	19	33497545	A	T	0.26	0.263274	0.0246566	0.9442
	rs11084696	RHPN2	19	33514898			0.22				Failed genotyping
	rs12610600	RHPN2	19	33487071			0				Failed genotyping
	rs16967749	RHPN2	19	33538297	A	G	0.13	0.158764	0.00105671	0.5474
	rs1974783	RHPN2	19	33551507			0.23				Failed genotyping
	rs2163807	RHPN2	19	33498978			0.47				Failed genotyping
	rs2216595	RHPN2	19	33533292	A	G	0.21	0.192113	0.0123283	0.119
	rs2304101	RHPN2	19	33467087	C	A	0.48	0.474219	0.0176118	0.4492
	rs2304102	RHPN2	19	33467357	A	G	0.38	0.370839	0.0105671	0.2494
	rs3816032	RHPN2	19	33467515	G	A	0.11	0.117862	0.0204297	0.5157
	rs3889147	RHPN2	19	33488936			0.34				Failed genotyping
	rs3991886	RHPN2	19	33472720	C	G	0.16	0.130337	0.0320535	0.9041
	rs4805025	RHPN2	19	33468067	A	G	0.22	0.251262	0.0038746	0.6177
	rs4805840	RHPN2	19	33468482	A	G	0.11	0.117351	0.00352237	0.6046
	rs6510326	RHPN2	19	33513342	G	A	0.4	0.417209	0.0066925	0.007915
	rs6510328	RHPN2	19	33516441	G	A	0.28	0.278689	0.032758	0.4159
	rs6510332	RHPN2	19	33530930	A	G	0.33	0.358372	0.0806622	0.001559
	rs6510337	RHPN2	19	33545701			0.33				Failed genotyping
	rs7246302	RHPN2	19	33510042	T	A	0.2	0.197834	0.00493131	0.1072
	rs7246814	RHPN2	19	33538414	A	C	0.34	0.361232	0.00810144	0.2942
	rs7257754	RHPN2	19	33502256	G	A	0.24	0.249818	0.0126805	0.006235
	rs7258185	RHPN2	19	33467576	A	G	0.22	0.239146	0.00704473	0.1837
	rs7258303	RHPN2	19	33466932	A	G	0.04	0.0503597	0.00211342	1
	rs8106013	RHPN2	19	33513781	A	G	0.3	0.32373	0.0574146	0.009871
	rs8106453	RHPN2	19	33557412	A	G	0.23	0.280916	0.0827756	0.05537
	rs8109247	RHPN2	19	33490685	A	G	0.26	0.264061	0.0183163	0.1866
	rs8109798	RHPN2	19	33469577	C	A	0.11	0.121114	0.00528355	0.2072
	rs8110267	RHPN2	19	33486822			0.25				Failed genotyping
	rs8112607	RHPN2	19	33470806	G	C	0.13	0.14846	0.0169074	0.06768
	rs9783948	RHPN2	19	33532511	A	G	0.11	0.0880866	0.00634026	0.1774
	rs11632715	SCG5/GREM1	15	33004247	A	G	0.46	0.469158	0.00845368	0.1944
	rs16969681	SCG5/GREM1	15	32993111	A	G	0.07	0.0904179	0.0066925	0.2504
	rs4779584	SCG5/GREM1	15	32994756	A	G	0.2	0.176094	0.375132	0.2608	Missing >20%
	rs10163132	SMAD3	15	67425574	T	A	0.21	0.212433	0.0545967	0.1601
	rs10518714	SMAD3	15	67432161	C	A	0.33	0.317164	0.0531877	1
	rs11071933	SMAD3	15	67401746	C	G	0.32	0.324456	0.0450863	0.3177
	rs11556090	SMAD3	15	67486383	A	G	0.47	0.491703	0.00774921	0.6676
	rs11629568	SMAD3	15	67482368	C	A	0.43	0.430213	0.605495	0.001654	Missing >20%
	rs11637659	SMAD3	15	67442386	A	G	0.2	0.187275	0.000704473	0.1868
	rs11639295	SMAD3	15	67460757	A	G	0.3	0.30137	0.00422684	0.2513
	rs12102171	SMAD3	15	67425033			0.18				Failed genotyping
	rs12439792	SMAD3	15	67437385	T	A	0.1	0.056701	0.35435	0.00912	Missing >20%
	rs12443188	SMAD3	15	67433941	T	A	0.23	0.217766	0.0500176	0.4692
	rs12900401	SMAD3	15	67486590	A	G	0.05	0.0492806	0.00140895	0.2518
	rs12901081	SMAD3	15	67370368	C	G	0.46	0.452415	0.0038746	0.6258
	rs12904944	SMAD3	15	67361774	A	G	0.34	0.340418	0.0352237	0.6267
	rs12910698	SMAD3	15	67375544	A	C	0.44	0.454414	0.00810144	0.0576
	rs12913547	SMAD3	15	67467507	G	A	0.23	0.206871	0.0545967	0.4533
	rs12914140	SMAD3	15	67430552	G	A	0.08	0.0663749	0.0179641	0.828
	rs12916733	SMAD3	15	67394384	G	A	0.28	0.276805	0.0162029	0.6859
	rs1438386	SMAD3	15	67407899			0.36				Failed genotyping
	rs1470002	SMAD3	15	67469568			0.39				Failed genotyping
	rs1470003	SMAD3	15	67469335	G	C	0.46	0.448551	0.0112716	0.3273
	rs16950559	SMAD3	15	67377808	A	T	0.04	0.0487365	0.00422684	0.5639
	rs16950635	SMAD3	15	67418205	A	G	0.04	0.0517241	0.0228954	0.1704
	rs17228212	SMAD3	15	67458639	G	A	0.29	0.257282	0.0443818	0.3165
	rs17228313	SMAD3	15	67460626	G	A	0.06	0.0758929	0.394505	0.02926	Missing >20%
	rs17293408	SMAD3	15	67434058	A	G	0.07	0.0766187	0.00211342	0.2566
	rs17293443	SMAD3	15	67437863	G	A	0.23	0.24622	0.00281789	0.5639
	rs17293632	SMAD3	15	67442596	A	G	0.21	0.256315	0.0415639	0.3527
	rs17294280	SMAD3	15	67468285	G	A	0.25	0.28685	0.00634026	0.1483
	rs2053295	SMAD3	15	67391739	G	A	0.13	0.125647	0.0243043	0.0249
	rs2118612	SMAD3	15	67400490	G	A	0.19	0.191176	0.487143	0.4073	Missing >20%
	rs2289263	SMAD3	15	67439207	C	A	0.47	0.489857	0.0489609	0.5105
	rs2414937	SMAD3	15	67432676	G	C	0.2	0.201154	0.00352237	0.3577
	rs3784681	SMAD3	15	67472185			0.28				Failed genotyping
	rs3809572	SMAD3	15	67356774	A	G	0.1	0.092827	0.706235	1	Missing >20%
	rs3825977	SMAD3	15	67481248	A	G	0.19	0.183016	0.0250088	0.4167
	rs4601989	SMAD3	15	67451954	A	G	0.24	0.200903	0.727721	0.6584	Missing >20%
	rs4776890	SMAD3	15	67393045	C	A	0.41	0.416606	0.0454385	0.824
	rs4776900	SMAD3	15	67450474	A	G	0.14	0.113947	0.00105671	0.2305
	rs6494629	SMAD3	15	67374111	G	A	0.46	0.477812	0.0528355	0.01714
	rs7163381	SMAD3	15	67414055	A	G	0.26	0.271834	0.0126805	0.1336
	rs7169183	SMAD3	15	67386861	G	C	0.43	0.399433	0.73547	0.001262	Missing >20%
	rs7178117	SMAD3	15	67425456	G	C	0.46	0.438092	0.0140895	0.07933
	rs7180244	SMAD3	15	67451774	C	G	0.06	0.0761029	0.0285312	1
	rs7180412	SMAD3	15	67413564			0.06				Failed genotyping
	rs7183244	SMAD3	15	67461311	A	G	0.41	0.368302	0.0440296	0.7681
	rs744910	SMAD3	15	67446785	A	G	0.48	0.482628	0.0715041	0.1525
	rs745103	SMAD3	15	67435075	G	A	0.47	0.470695	0.00810144	0.1955
	rs8031627	SMAD3	15	67484119	A	G	0.22	0.231795	0.00528355	0.7064
	rs893473	SMAD3	15	67438091	A	G	0.21	0.177729	0.0176118	0.9262
	rs920293	SMAD3	15	67414425	G	A	0.09	0.0822416	0.0158507	0.3679
	rs9972423	SMAD3	15	67391805	A	T	0.39	0.358289	0.0774921	0.1864
	rs11874392	SMAD7	18	46453156	T	A	0.45	0.479348	0.0102149	0.1314
	rs12456328	SMAD7	18	46457096			0.1				Failed genotyping
	rs12953717	SMAD7	18	46453929	A	G	0.45	0.427835	0.0292356	0.1083
	rs12956924	SMAD7	18	46451146			0.29				Failed genotyping
	rs1316447	SMAD7	18	46472676	A	G	0.2	0.185172	0.0137372	0.1518
	rs16950087	SMAD7	18	46442183	A	G	0.04	0.0423851	0.000704473	0.1725
	rs17186485	SMAD7	18	46449032	A	G	0.06	0.0732759	0.00176118	1
	rs17186877	SMAD7	18	46461012	A	G	0.34	0.302291	0.0228954	0.4028
	rs1873190	SMAD7	18	46468356	A	G	0.34	0.286477		4.696e-06	Failed HWE
	rs2337106	SMAD7	18	46460903	G	C	0.44	0.478277	0.00810144	0.4834
	rs2337107	SMAD7	18	46459323	A	G	0.45	0.393845	0.224375	0.317	Missing >20%
	rs2337143	SMAD7	18	46482070	A	G	0.32	0.301432	0.059528	0.0006849
	rs3736242	SMAD7	18	46474746	A	G	0.22	0.222222	0.013385	0.533
	rs3764482	SMAD7	18	46468946	A	G	0.2	0.1882	0.0433251	0.325
	rs4464148	SMAD7	18	46459032	G	A	0.34	0.293129	0.0183163	0.1032
	rs4939827	SMAD7	18	46453463	G	A	0.47	0.494407	0.0447341	0.01195
	rs4939830	SMAD7	18	46463058	A	G	0.07	0.0921243	0.00422684	0.6308
	rs4939832	SMAD7	18	46465665	G	A	0.24	0.244773	0.00352237	0.9421
	rs4991143	SMAD7	18	46452637			0.1				Failed genotyping
	rs6507874	SMAD7	18	46448805	G	A	0.46	0.482169	0.0116238	0.2568
	rs6507877	SMAD7	18	46458950	A	G	0.44	0.375943	0.0493131	0.2192
	rs7227023	SMAD7	18	46454139	A	G	0.1	0.0900576	0.00352237	0.4102
	rs7229639	SMAD7	18	46450976	A	G	0.1	0.0902229	0.00211342	0.1912
	rs7238442	SMAD7	18	46461786	G	A	0	0.44697	0.00493131	0.9135
	rs7351039	SMAD7	18	46460656	A	G	0.05	0.0692641	0.00352237	0.8344
	rs884013	SMAD7	18	46456130	A	G	0.04	0.0494585	0.00493131	0.1435
	rs9945724	SMAD7	18	46440489	A	G	0.05	0.05743	0	1
	rs9946510	SMAD7	18	46458227	C	A	0.34	0.29611	0.00563579	0.1221
	rs10417924	TGFB1	19	41833167	A	G	0.18	0.221981	0.00915815	0.5856
	rs11466321	TGFB1	19	41854916	G	A	0.07	0.0663302	0.00352237	1
	rs11466338	TGFB1	19	41845801	G	A	0.07	0.0559259	0.0345192	0.6055
	rs12980942	TGFB1	19	41832231	A	G	0.17	0.138829	0.00634026	0.6525
	rs1800468	TGFB1	19	41860587	G	A	0.08	0.421192		3.627e-197	Failed HWE
	rs1800469	TGFB1	19	41860296	A	G	0.31	0.339864	0.655513	0.9268	Missing >20%
	rs1800472	TGFB1	19	41847860			0.03				Failed genotyping
	rs1982072	TGFB1	19	41864509	T	A	0.31	0.329359	0.0471997	0.01135
	rs2241714	TGFB1	19	41869392			0.33				Failed genotyping
	rs2241718	TGFB1	19	41829606	A	G	0.18	0.156318	0.00598802	0.1261
	rs2317130	TGFB1	19	41861674	G	A	0.32	0.328871	0.0066925	0.113
	rs4803455	TGFB1	19	41851509	A	C	0.5	0.483648	0.0169074	0.7461
	rs4803457	TGFB1	19	41861359	A	G	0.38	0.391207	0.0412117	0.9543
	rs6957	TGFB1	19	41830606	G	A	0.19	0.159942	0.00422684	0.2301
	rs8110090	TGFB1	19	41845872	G	A	0.04	0.0539568	0.00211342	0.7936
	rs8179181	TGFB1	19	41838206			0.24				Failed genotyping
	rs2072239	TGFBI	5	135392507			0.23				Failed genotyping
	rs10512263	TGFBR1	9	101886071	G	A	0.08	0.0627706	0.0066925	0.8175
	rs10733710	TGFBR1	9	101907424	A	G	0.22	0.234818	0.49137	0.6099	Missing >20%
	rs10739778	TGFBR1	9	101875789			0.33				Failed genotyping
	rs10739779	TGFBR1	9	101882199	A	C	0.19	0.186147	0.00493131	0.6576
	rs10988705	TGFBR1	9	101868571	A	G	0.03	0.0612431	0.225784	1	Missing >20%
	rs11568785	TGFBR1	9	101905834			0.08				Failed genotyping
	rs334354	TGFBR1	9	101908915	A	G	0.19	0.190837	0.00422684	0.4866
	rs6478974	TGFBR1	9	101874403	T	A	0.48	0.475812	0.00528355	0.4842
	Inflammation
	rs10751382	ALOX5	10	45936359	G	A	0.31	0.314639	0.0179641	0.5316
	rs10900213	ALOX5	10	45904714	C	A	0.42	0.462896	0.00317013	0.2145
	rs11239515	ALOX5	10	45902055	G	A	0.17	0.152928	0.00845368	0.3495
	rs11239516	ALOX5	10	45902537	A	C	0.17	0.145879	0.0186685	0.5164
	rs11239523	ALOX5	10	45912237	G	A	0.17	0.15073	0.0140895	0.2921
	rs12264801	ALOX5	10	45914744	A	G	0.48	0.454114	0.784079	0.3663	Missing >20%
	rs12762303	ALOX5	10	45869171	G	A	0.18	0.156632	0.242339	0.7276	Missing >20%
	rs1369214	ALOX5	10	45900729	A	G	0.46	0.44461	0.0292356	0.3204
	rs1487562	ALOX5	10	45928822	A	G	0.21	0.193027	0.172244	0.7079
	rs1565096	ALOX5	10	45924023			0.23				Failed genotyping
	rs1565097	ALOX5	10	45924256	A	G	0.23	0.236647	0.0362804	0.8802
	rs1864414	ALOX5	10	45870561	C	A	0.18	0.16	0.0577668	0.2608
	rs2115819	ALOX5	10	45901089	G	A	0.45	0.438679	0.00915815	0.1126
	rs2228064	ALOX5	10	45878050			0				Failed genotyping
	rs2279435	ALOX5	10	45923528			0.44				Failed genotyping
	rs2291427	ALOX5	10	45936224	A	G	0.31	0.315108	0.00246566	1
	rs3780894	ALOX5	10	45874660	G	A	0.17	0.143939	0.0510743	0.09329
	rs3780914	ALOX5	10	45935744	G	A	0.49	0.490144	0.0626981	0.06107
	rs3824612	ALOX5	10	45872864			0.39				Failed genotyping
	rs4948671	ALOX5	10	45880056	G	A	0.36	0.397036	0.0605847	0.388
	rs4948672	ALOX5	10	45914527	G	C	0.45	0.456475	0.00176118	0.5165
	rs4986832	ALOX5	10	45868028			0.18				Failed genotyping
	rs6593482	ALOX5	10	45868449	A	C	0.18	0.155456	0.0338147	0.917
	rs6593485	ALOX5	10	45916834			0.28				Failed genotyping
	rs7084793	ALOX5	10	45865079	G	A	0.18	0.163511	0.0102149	0.8434
	rs7099684	ALOX5	10	45897155			0.2				Failed genotyping
	rs745986	ALOX5	10	45878908	G	A	0.23	0.217438	0.00704473	0.8746
	rs7896431	ALOX5	10	45937423	A	G	0.45	0.468984	0.0443818	0.007131
	rs7918542	ALOX5	10	45896251	G	A	0.23	0.214597	0.0154984	0.5227
	rs901681	ALOX5	10	45934529	A	C	0.49	0.499635	0.0186685	0.009517
	rs934187	ALOX5	10	45896207	G	A	0.36	0.393732	0.00352237	0.9552
	rs11177072	IFNG	12	68542541	A	G	0.14	0.252242		8.516e-05	Failed HWE
	rs11177074	IFNG	12	68544434	G	A	0.07	0.0679682	0.0066925	0.2831
	rs1558744	IFNG	12	68504592			0.4				Failed genotyping
	rs1861493	IFNG	12	68551196	G	A	0.27	0.264923	0.0218387	0.006511
	rs2069705	IFNG	12	68555011	G	A	0.33	0.30968	0.0126805	0.005464
	rs2069716	IFNG	12	68550815	G	A	0.06	0.0664488	0.0109193	0.01563
	rs2069723	IFNG	12	68548594			0				Failed genotyping
	rs2069727	IFNG	12	68548223	G	A	0.46	0.482967	0.0577668	0.000338
	rs2069728	IFNG	12	68547784	A	G	0.07	0.0638068	0.0038746	1
	rs2430561	IFNG	12	68552522			0.46				Failed genotyping
	rs7134599	IFNG	12	68500075			0.37				Failed genotyping
	rs971545	IFNG	12	68591685	G	A	0.47	0.499267	0.0228954	0.002428
	rs10494879	IL10	1	206952204	C	G	0.39	0.403061	0.0151462	0.7365
	rs1518110	IL10	1	206944861			0.22				Failed genotyping
	rs17015767	IL10	1	206951398	C	G	0.21	0.217549	0.00986263	0.5796
	rs1800871	IL10	1	206946634	A	G	0.24	0.234837	0.0806622	0.3518
	rs1800872	IL10	1	206946407	C	A	0.24	0.367781		1.775e-11	Failed HWE
	rs1800890	IL10	1	206949365	A	T	0.37	0.380901	0.00951039	0.7317
	rs1800893	IL10	1	206947167	A	G	0.45	0.482684	0.00422684	0.9571
	rs1800896	IL10	1	206946897	G	A	0.45	0.482996	0.0066925	0.9142
	rs2222202	IL10	1	206945381	A	G	0.45	0.481897	0.0102149	0.8717
	rs3021094	IL10	1	206944952	C	A	0.09	0.0823657	0.00739697	0.3694
	rs3024490	IL10	1	206945311	A	C	0.24	0.241739	0.00105671	0.3417
	rs3024495	IL10	1	206942413			0.17				Failed genotyping
	rs3024498	IL10	1	206941529	G	A	0.23	0.242257	0.0288834	1
	rs3024505	IL10	1	206939904	A	G	0.17	0.160349	0.0514266	0.4746
	rs3024509	IL10	1	206943297	G	A	0.06	0.0731707	0.025361	0.6891
	rs4390174	IL10	1	206932451			0.36				Failed genotyping
	rs6673928	IL10	1	206937245	A	C	0.23	0.209553		1.515e-07	Failed HWE
	rs6686931	IL10	1	206955651	A	G	0.22	0.216872	0.00810144	0.205
	rs11216666	IL10R	11	117876035	G	A	0.19	0.170029	0.00352237	0.2156
	rs17121510	IL10R	11	117876155	G	A	0.13	0.117896	0.065516	0.1111
	rs2228054	IL10R	11	117864113	A	G	0.06	0.0569253	0.00880592	1
	rs2228055	IL10R	11	117864846			0.05				Failed genotyping
	rs2229113	IL10R	11	117869670	A	G	0.32	0.30486	0.0239521	1
	rs2229114	IL10R	11	117869878			0.04				Failed genotyping
	rs2256111	IL10R	11	117864047	A	G	0.49	0.468981	0.0324058	0.156
	rs2512149	IL10R	11	117881601			0.2				Failed genotyping
	rs4252270	IL10R	11	117863846	A	G	0.11	0.0954611	0.00246566	0.5329
	rs4252314	IL10R	11	117868517			0.04				Failed genotyping
	rs4936414	IL10R	11	117853613	G	A	0.32	0.322977	0.00563579	0.6231
	rs4938467	IL10R	11	117875171	A	G	0.48	0.497818	0.013385	0.1607
	rs947890	IL10R	11	117874493	A	G	0.14	0.12391	0.0151462	0.1703
	rs668998	IL12A	3	159715551	G	A	0.47	0.449381	0.0109193	1
	rs1003199	IL12B	5	158755566	A	G	0.47	0.483565	0.0176118	0.3872
	rs10052709	IL12B	5	158760477	C	G	0.14	0.133359	0.0732652	0.6318
	rs1422876	IL12B	5	158761299			0.5				Failed genotyping
	rs1433048	IL12B	5	158755845	G	A	0.19	0.186825	0.00352237	0.1114
	rs1865014	IL12B	5	158739088	A	G	0.17	0.194325	0.00246566	0.3918
	rs2546890	IL12B	5	158759900	G	A	0.49	0.487699	0.00810144	0.788
	rs2546893	IL12B	5	158755960	A	G	0.47	0.480044	0.034167	0.7439
	rs2853694	IL12B	5	158749088	C	A	0.47	0.497087	0.0123283	0.6661
	rs3181216	IL12B	5	158752978	A	T	0.3	0.312186	0.45826	0.2842	Missing >20%
	rs3181219	IL12B	5	158752139			0.13				Failed genotyping
	rs3181225	IL12B	5	158740623	A	G	0.17	0.172973	0.0683339	0.2431
	rs3212227	IL12B	5	158742950	C	A	0.22	0.200577	0.00493131	0.8022
	rs3213096	IL12B	5	158750329	A	G	0	0.005743	0	1
	rs3213119	IL12B	5	158743788	A	C	0.04	0.0317518	0.0137372	0.3974
	rs3213120	IL12B	5	158743108	A	G	0.04	0.0299423	0.0066925	0.6319
	rs4921466	IL12B	5	158732772	G	A	0.12	0.0821862	0.114477	0.3415
	rs4921468	IL12B	5	158735933	A	G	0.31	0.300651	0.00774921	0.8982
	rs6868898	IL12B	5	158764420	G	A	0.32	0.316437	0.00810144	0.1914
	rs6870828	IL12B	5	158738512	G	A	0.47	0.494048	0.0352237	0.9132
	rs730691	IL12B	5	158756227	A	G	0.38	0.379427	0.047552	0.5213
	rs7709212	IL12B	5	158764177	G	A	0.35	0.339957	0.00493131	0.2084
	rs1834481	IL18	11	112023827	C	G	0.22	0.229425	0.0147939	0.4919
	rs1946519	IL18	11	112035507	A	C	0.42	0.404899	0.00422684	0.08448
	rs544354	IL18	11	112012630	A	G	0.12	0.114652	0.0154984	0.06207
	rs795467	IL18	11	112031080	A	G	0.29	0.277126	0.0183163	0.0004373
	rs1143627	IL1A/IL1B	2	113594387	G	A	0.35	0.336691	0.00422684	0.1677
	rs1143634	IL1A/IL1B	2	113590390	A	G	0.25	0.237787	0.00105671	0.4594
	rs1143643	IL1A/IL1B	2	113588302			0.34				Failed genotyping
	rs16944	IL1A/IL1B	2	113594867	A	G	0.35	0.366864	0.879183	1	Missing >20%
	rs17561	IL1A/IL1B	2	113537223	A	C	0.29	0.295076	0.00951039	0.4766
	rs1800587	IL1A/IL1B	2	113542960	A	G	0.29	0.299628	0.0331103	0.7949
	rs2856838	IL1A/IL1B	2	113539972	A	G	0.39	0.395434	0.0507221	0.8205
	rs3136558	IL1A/IL1B	2	113591275	G	A	0.25	0.221273	0.0778443	0.4192
	rs315952	IL1A/IL1B	2	113890304	G	A	0.28	0.274347	0.111659	0.158
	rs3783516	IL1A/IL1B	2	113545678	A	G	0.39	0.400292	0.0154984	0.3985
	rs3783546	IL1A/IL1B	2	113534830	G	C	0.32	0.30173	0.00281789	0.1426
	rs419598	IL1A/IL1B	2	113887207	G	A	0.29	0.285817	0.00281789	0.7927
	rs4848300	IL1A/IL1B	2	113527906	G	A	0.29	0.289338	0.0200775	0.5096
	rs2069762	IL2/IL21	4	123377980	C	A	0.29	0.300912	0.0503698	0.6464
	rs2069772	IL2/IL21	4	123373133	G	A	0.3	0.301195	0.0877069	0.0442
	rs2069776	IL2/IL21	4	123371976	G	A	0.27	0.27548	0.0239521	0.8917
	rs2069778	IL2/IL21	4	123376135	A	G	0.15	0.153535	0.0246566	0.2104
	rs2069779	IL2/IL21	4	123373897	A	G	0.08	0.0746951	0.0662205	0.02772
	rs4833248	IL2/IL21	4	123380405	A	G	0.29	0.286759	0.0154984	0.186
	rs10242595	IL6	7	22774231	A	G	0.32	0.317558	0.00598802	0.01833
	rs10499563	IL6	7	22760488			0.23				Failed genotyping
	rs12700386	IL6	7	22763009	C	G	0.19	0.180262	0.0154984	0.1716
	rs1474347	IL6	7	22768124	C	A	0.41	0.427843	0.0123283	0.1364
	rs1474348	IL6	7	22767908	G	C	0.41	0.426182	0.0130328	0.07759
	rs1554606	IL6	7	22768707	A	C	0.43	0.447406	0.00457908	0.3851
	rs1800795	IL6	7	22766645	G	C	0.42	0.433935	0.304333	0.168	Missing >20%
	rs1800797	IL6	7	22766221	A	G	0.41	0.419798	0.0066925	0.3207
	rs2056576	IL6	7	22761202	A	G	0.33	0.308411	0.0827756	0.296
	rs2066992	IL6	7	22768249	A	C	0.05	0.0471768	0.0317013	0.5351
	rs2069827	IL6	7	22765456			0.12				Failed genotyping
	rs2069840	IL6	7	22768572	C	G	0.33	0.333089	0.0278267	0.5831
	rs2069849	IL6	7	22771156	A	G	0.02	0.0219267	0.00140895	0.4896
	rs2069860	IL6	7	22771038	T	A	0	0.0111351	0.000704473	0.0004734
	rs2069861	IL6	7	22771654			0.07				Failed genotyping
	rs2097677	IL6	7	22732839			0.25				Failed genotyping
	rs7801406	IL6	7	22788274	A	G	0.39	0.374611	0.322649	1	Missing >20%
	rs7801617	IL6	7	22758082	A	G	0.12	0.108711	0.0038746	0.3309
	rs7805828	IL6	7	22758562	A	G	0.41	0.406048	0.00317013	0.317
	rs2227306	IL8	4	74607055	A	G	0.39	0.443144	0.789715	0.1005	Missing >20%
	rs4073	IL8	4	74606024	T	A	0.42	0.45684	0.0144417	0.01416
	rs10489113	NFKB1	4	103542201	G	A	0.18	0.212536	0.00317013	0.2299
	rs11940017	NFKB1	4	103420759	G	A	0.06	0.0390738	0.0066925	0.7195
	rs13117745	NFKB1	4	103478703	A	G	0.14	0.167146	0.00211342	0.501
	rs1598856	NFKB1	4	103446115	A	G	0.46	0.456	0.111659	0.9545
	rs1598861	NFKB1	4	103486697	C	A	0.35	0.422892		4.688e-34	Failed HWE
	rs1609798	NFKB1	4	103537442	A	G	0.31	0.289379	0.00880592	0.1505
	rs1609993	NFKB1	4	103514658			0.08				Failed genotyping
	rs230489	NFKB1	4	103388441	G	A	0.11	0.101396	0.0235999	0.02424
	rs230529	NFKB1	4	103457418			0.41				Failed genotyping
	rs230539	NFKB1	4	103495532	G	A	0.34	0.355918	0.115886	0.03422
	rs230540	NFKB1	4	103496667	G	A	0.34	0.315946	0.0408595	0.2068
	rs230547	NFKB1	4	103536261	A	G	0.1	0.0872483	0.0560056	0.3058
	rs3774934	NFKB1	4	103427476	A	G	0.1	0.0946942	0.0228954	0.5269
	rs3774937	NFKB1	4	103434253	G	A	0.34	0.315152	0.78584	0.7986	Missing >20%
	rs3821958	NFKB1	4	103508824	G	A	0.41	0.374363	0.0123283	0.8628
	rs4648022	NFKB1	4	103496437	A	G	0.07	0.0906475	0.0038746	0.6239
	rs4648037	NFKB1	4	103504779	G	A	0.05	0.0387962	0.00880592	0.1461
	rs4648072	NFKB1	4	103518700	G	A	0	0.00720461	0.00317013	0.001835
	rs4648090	NFKB1	4	103527068	A	G	0.12	0.143891	0.0986263	0.9087
	rs4648095	NFKB1	4	103527876	G	A	0.05	0.0371179	0.0123283	0.1138
	rs4648110	NFKB1	4	103533821	A	T	0.18	0.213923	0.00739697	0.05484
	rs4648127	NFKB1	4	103535905	G	A	0.06	0.438178		1.092e-214	Failed HWE
	rs4648135	NFKB1	4	103536670	G	A	0.06	0.0427846	0.00915815	0.3114
	rs4698863	NFKB1	4	103545848	A	G	0.31	0.293054	0.00951039	0.3632
	rs7665090	NFKB1	4	103551603	A	G	0.49	0.486343	0.0500176	0.2473
	rs7674640	NFKB1	4	103540780	G	A	0.49	0.48581	0.0366326	0.477
	rs997476	NFKB1	4	103542005	A	C	0.06	0.0641399	0.0109193	1
	rs10896027	RELA (p65)	11	65420760	C	G	0.35	0.357451	0.00457908	0.0703
	rs11820062	RELA (p65)	11	65429936	G	A	0.49	0.482177	0.257485	0.2907	Missing >20%
	rs7119750	RELA (p65)	11	65422591	A	G	0.13	0.12069	0.00281789	1
	rs1041981	TNF	6	31540784	A	C	0	0.358766	0.790771	0.457	Missing >20%
	rs1799964	TNF	6	31542308	G	A	0	0.211701	0.0665727	0.003589
	rs1800629	TNF	6	31543031	G	A	0	0.264488		1.993e-92	Failed HWE
	rs1800630	TNF	6	31542476	A	C	0	0.16321	0.234237	0.4417	Missing >20%
	rs2009658	TNF	6	31538244	G	C	0	0.162399	0.0172596	0.551
	rs2256965	TNF	6	31555130			0				Failed genotyping
	rs2844482	TNF	6	31539767			0				Failed genotyping
	rs3093662	TNF	6	31544189	G	A	0	0.0720981	0.00281789	0.5443
	rs361525	TNF	6	31543101			0				Failed genotyping
	rs909253	TNF	6	31540313	G	A	0	0.336608	0.0140895	0.717
	rs9267502	TNF	6	31553194	A	G	0	0.0876068	0.629447	0.2385	Missing >20%
	Oxidative Stress
	rs10121	GPx2	14	65412773	A	G	0.08	0.0766129	0.0218387	0.5665
	rs10133290	GPx2	14	65404442	C	A	0.19	0.220126	0.0845368	0.6835
	rs11623705	GPx2	14	65405722	A	C	0.11	0.125556	0.0320535	0.6216
	rs12172810	GPx2	14	65405382	A	G	0.19	0.202381	0.0038746	0.9339
	rs1800669	GPx2	14	65409204	T	A	0.03	0.0249366	0.199366	0.1614
	rs2071566	GPx2	14	65407000	A	G	0.3	0.298988	0.00774921	0.2236
	rs2277501	GPx2	14	65412441	G	A	0.34	0.333584	0.0503698	0.1085
	rs2277502	GPx2	14	65412278	A	G	0.11	0.127168	0.00598802	0.3956
	rs2296327	GPx2	14	65410547			0.21				Failed genotyping
	rs2412065	GPx2	14	65407657	G	C	0.19	0.217877	0.114829	0.2456
	rs2412106	GPx2	14	65427810	G	A	0.34	0.351906	0.0331103	0.5529
	rs2737844	GPx2	14	65408509	A	G	0.3	0.298758	0.0158507	0.1066
	rs3742599	GPx2	14	65411908	A	C	0.16	0.171293	0.0140895	0.7039
	rs3825644	GPx2	14	65411499	C	A	0.05	0.0438671	0.180345	1
	rs4902346	GPx2	14	65407160	G	A	0.19	0.203677	0.00246566	0.8685
	rs4902347	GPx2	14	65411200	A	G	0.11	0.125723	0.0112716	0.4622
	rs1002149	GSR	8	30585738	A	C	0.16	0.164986	0.00528355	0.2059
	rs17557435	GSR	8	30575838	G	A	0.11	0.13213	0.00598802	0.815
	rs2020916	GSR	8	30546778		C	0	0	0.00176118	1	Constant
	rs2253409	GSR	8	30546966	G	C	0.2	0.220418	0.00422684	0.4816
	rs2551715	GSR	8	30546636	G	A	0.37	0.171189		5.21e-23	Failed HWE
	rs2978295	GSR	8	30575874	C	G	0.18	0.188176	0.00598802	0.4286
	rs2978662	GSR	8	30569827	G	A	0.18	0.183321	0.0246566	0.7865
	rs2978663	GSR	8	30565945	G	A	0.36	0.318663		4.047e-09	Failed HWE
	rs3594	GSR	8	30535660	A	C	0.41	0.380338	0.098274	0.3667
	rs3757918	GSR	8	30562121			0.43				Failed genotyping
	rs3779647	GSR	8	30560887	G	A	0.43	0.441155	0.00810144	0.3009
	rs8190893	GSR	8	30583904	A	G	0.06	0.0655148	0.00317013	0.1847
	rs8190996	GSR	8	30554006	A	G	0.45	0.440364	0.0144417	0.1548
	rs2758339	SOD2	6	160112584	C	A	0.45	0.485091	0.00986263	1
	rs2842960	SOD2	6	160113321	A	G	0.47	0.49634	0.0225431	0.6265
	rs2842980	SOD2	6	160100116	A	T	0.21	0.195019	0.0665727	0.1119
	rs4342445	SOD2	6	160098222	A	G	0.27	0.236958	0.0246566	0.2608
	rs4880	SOD2	6	160113872			0.47				Failed genotyping
	rs5746081	SOD2	6	160115454	A	G	0.03	0.0345572	0.00281789	0.224
	rs5746136	SOD2	6	160103084	A	G	0.33	0.299927	0.00951039	0.04629
	rs5746141	SOD2	6	160102710	A	G	0.05	0.0437637	0.0179641	1
	rs5746142	SOD2	6	160102593	A	G	0	0.000717875	0	1
	rs5746151	SOD2	6	160101320	A	G	0.06	0.0622182	0.249384	0.7945	Missing >20%
	rs6917589	SOD2	6	160099260	G	A	0.27	0.236009	0.0243043	0.1319
	rs7855	SOD2	6	160100302			0.06				Failed genotyping
	rs911847	SOD2	6	160068968	A	G	0.28	0.293463	0.00140895	0.4773
	rs10047589	TXNRD1 (TR1)	12	104744388	A	G	0.33	0.309875	0.0281789	1
	rs10735392	TXNRD1 (TR1)	12	104674198	G	A	0.11	0.0921243	0.00493131	0.1054
	rs10778318	TXNRD1 (TR1)	12	104671506	A	G	0.34	0.292515	0.0116238	0.1036
	rs10861201	TXNRD1 (TR1)	12	104718959	A	C	0.24	0.191964	0.644593	0.3424	Missing >20%
	rs11111979	TXNRD1 (TR1)	12	104680782	C	G	0.48	0.427591	0.0704473	0.1019
	rs11608353	TXNRD1 (TR1)	12	104756448	G	C	0.06	0.0503597	0.00211342	0.7754
	rs11609469	TXNRD1 (TR1)	12	104751232			0.41				Failed genotyping
	rs11611385	TXNRD1 (TR1)	12	104742310	A	G	0.09	0.0488636	0.427968	0.003241	Missing >20%
	rs17202060	TXNRD1 (TR1)	12	104730846	A	G	0.3	0.349782	0.0137372	0.1392
	rs17808695	TXNRD1 (TR1)	12	104753214	G	A	0.15	0.146805	0.00140895	0.5209
	rs35009941	TXNRD1 (TR1)	12	104682528	C	G	0	0.00502874		5.256e-09	Failed HWE
	rs4564401	TXNRD1 (TR1)	12	104703228	G	A	0.09	0.0715323	0.0109193	0.1056
	rs4964287	TXNRD1 (TR1)	12	104709559	A	G	0.34	0.311375	0.0038746	0.9004
	rs4964778	TXNRD1 (TR1)	12	104686064	C	G	0.2	0.175	0.011976	0.4571
	rs7294778	TXNRD1 (TR1)	12	104689459			0.48				Failed genotyping
	rs7301631	TXNRD1 (TR1)	12	104673262			0.49				Failed genotyping
	rs7342395	TXNRD1 (TR1)	12	104668544	A	T	0.34	0.2938	0.00634026	0.2719
	rs75436938	TXNRD1 (TR1)	12	104751472	G	A	0.1	0.0914862	0.0408595	0.3259
	rs7953266	TXNRD1 (TR1)	12	104756264	G	A	0.42	0.37401	0.00457908	0.7312
	rs7962423	TXNRD1 (TR1)	12	104710910	G	A	0.11	0.0889052	0.0186685	0.04339
	rs7962759	TXNRD1 (TR1)	12	104739016	G	C	0.23	0.23346		4.086e-05	Failed HWE
	rs7962942	TXNRD1 (TR1)	12	104681428	A	G	0.24	0.227734	0.00951039	0.7595
	rs7977617	TXNRD1 (TR1)	12	104747837	C	A	0.17	0.136758	0.00528355	0.9097
	rs7978310	TXNRD1 (TR1)	12	104748620	A	G	0.07	0.0559163	0.00352237	0.3133
	VDR Binding Sites (Ramagopalan, et al. 2010. PMID: 20736230)
	rs10798269	VDR binding site	1	173309713			0.34				Failed genotyping
	rs10995271	VDR binding site	10	64438486	G	C	0.38	0.381213	0.0169074	0.3903
	rs11175593	VDR binding site	12	40601940	A	G	0.02	0.0273578	0.00317013	0.6223
	rs11190140	VDR binding site	10	101291593	A	G	0.5	0.471821	0.00634026	0.6665
	rs1551398	VDR binding site	8	126540051	G	A	0.37	0.374785	0.212399	0.1689	Missing >20%
	rs17582416	VDR binding site	10	35287650	C	A	0.36	0.368799	0.00317013	1
	rs2188962	VDR binding site	5	131770805	A	G	0.39	0.417932	0.00634026	0.8684
	rs2205960	VDR binding site	1	173191475	A	C	0.23	0.222061	0.0105671	0.08636
	rs2230926	VDR binding site	6	138196066	C	A	0.02	0.0362527	0.00140895	0.007872
	rs2274910	VDR binding site	1	160852046	A	G	0.32	0.331235	0.0989785	0.4474
	rs2301436	VDR binding site	6	167437988	A	G	0.45	0.461314	0.0179641	0.07305
	rs2872507	VDR binding site	17	38040763	A	G	0.47	0.450832	0.00739697	0.8706
	rs3197999	VDR binding site	3	49721532	A	G	0.31	0.309731	0.00845368	0.7526
	rs3802842	VDR binding site	11	111171709	C	A	0.27	0.266739	0.0190208	0.0272
	rs3828309	VDR binding site	2	234180410	A	G	0.46	0.463695	0.00140895	0.2149
	rs4613763	VDR binding site	5	40392728	G	A	0.13	0.129603	0.00493131	0.3427
	rs5029939	VDR binding site	6	138195723	C	G	0.02	0.0337886	0.00211342	0.6688
	rs6908425	VDR binding site	6	20728731	A	G	0.2	0.207961	0.0366326	0.1369
	rs762421	VDR binding site	21	45615561	G	A	0.38	0.395248	0.00317013	0.03775
	rs7746082	VDR binding site	6	106435269	C	G	0.29	0.284321	0.00563579	0.1129
	rs7927894	VDR binding site	11	76301316	A	G	0.37	0.398237	0.0232476	0.5717
	Insulin growth factor signaling
	rs1245541	IGF levels	10	73849639	A	G	0.36	0.390066	0.0186685	0.7334
	rs33958176	IGF levels	15	99454613		G	0	0	0.000704473	1	Constant
	rs4234798	IGF levels	4	7219933	A	C	0.37	0.378111	0.0165551	0.7736
	rs700752	IGF levels	7	46753553	C	G	0.33	0.350941	0.0137372	0.4791
	rs7780564	IGF levels	7	7883323			0.45				Failed genotyping
	rs780094	IGF levels	2	27741237	A	G	0.41	0.400578	0.00774921	0.09306
	rs1019731	IGF1	12	102864425	A	C	0.13	0.135699	0.0257133	0.02789
	rs10735380	IGF1	12	102844236	G	A	0.25	0.341282		5.937e-05	Failed HWE
	rs10860860	IGF1	12	102780833	A	T	0.29	0.296635	0.0123283	1
	rs10860861	IGF1	12	102785569	A	G	0.5	0.488244	0.025361	0.7863
	rs10860862	IGF1	12	102786072	A	C	0.2	0.176756	0.0380416	0.5726
	rs10860865	IGF1	12	102831722	A	C	0.24	0.267754	0.0102149	0.3366
	rs10860869	IGF1	12	102865052	T	A	0.27	0.282828	0.00352237	0.8947
	rs11111262	IGF1	12	102798177	A	G	0.09	0.106628	0.00317013	0.3961
	rs12821878	IGF1	12	102867667	A	G	0.23	0.21936	0.0771398	0.222
	rs1520220	IGF1	12	102796522	G	C	0.16	0.191311	0.0570623	0.1086
	rs17727841	IGF1	12	102809630	G	C	0.17	0.187365	0.00528355	0.7915
	rs1980236	IGF1	12	102767892	A	G	0.5	0.489075	0.0116238	0.4828
	rs2195239	IGF1	12	102856702	C	G	0.23	0.251618	0.00246566	0.6696
	rs2288377	IGF1	12	102874762	T	A	0.02	0.0147801		5.651e-06	Failed HWE
	rs2946831	IGF1	12	102786780	C	A	0.06	0.0676556	0.00493131	0.8297
	rs2946834	IGF1	12	102787814			0.31				Failed genotyping
	rs35765	IGF1	12	102881696	A	C	0.12	0.114306	0.00176118	0.6907
	rs35767	IGF1	12	102875569			0.16				Failed genotyping
	rs5742620	IGF1	12	102869600	A	C	0.04	0.0275163	0.00951039	0.002938
	rs6214	IGF1	12	102793569	A	G	0.41	0.396769	0.08031	0.03469
	rs7136446	IGF1	12	102838515	G	A	0.4	0.411273	0.0140895	0.9556
	rs1374910	IGF2BP2	3	185531661			0.05				Failed genotyping
	rs1470579	IGF2BP2	3	185529080	C	A	0.3	0.310108	0.00528355	0.4896
	rs4402960	IGF2BP2	3	185511687	A	C	0.3	0.304614	0.00493131	0.4468
	rs6769511	IGF2BP2	3	185530290	G	A	0.3	0.310606	0.00634026	0.4515
	rs720390	IGF2BP2	3	185548683			0.38				Failed genotyping
	rs10932674	IGFBP2/IGFBP5	2	217568654	C	G	0.24	0.232971	0.0105671	0.7632
	rs11575134	IGFBP2/IGFBP5	2	217555824	A	G	0.2	0.216595	0.000352237	0.8126
	rs11575194	IGFBP2/IGFBP5	2	217543728	A	G	0.03	0.0402878	0.0130328	0.06847
	rs11575195	IGFBP2/IGFBP5	2	217543633	A	G	0.03	0.0359216	0.0116238	1
	rs1525608	IGFBP2/IGFBP5	2	217493755	A	G	0.42	0.422495	0.00634026	0.2484
	rs16856445	IGFBP2/IGFBP5	2	217495899	A	C	0.2	0.211063	0.0123283	1
	rs1978345	IGFBP2/IGFBP5	2	217562362	A	G	0.37	0.35255	0.032758	0.4755
	rs2067041	IGFBP2/IGFBP5	2	217534244	G	A	0.07	0.0676856	0.0116238	0.1291
	rs2241193	IGFBP2/IGFBP5	2	217554213	A	G	0.15	0.152108	0.574498	0.8801	Missing >20%
	rs2241198	IGFBP2/IGFBP5	2	217539068	A	C	0.03	0.0335622	0.0605847	1
	rs2270360	IGFBP2/IGFBP5	2	217524986	C	A	0.31	0.296763	0.00457908	0.7972
	rs2372848	IGFBP2/IGFBP5	2	217504112	A	G	0.1	0.057383	0.0186685	0.8001
	rs3276	IGFBP2/IGFBP5	2	217536998	A	G	0.04	0.0520833	0.00140895	1
	rs35668692	IGFBP2/IGFBP5	2	217497537	G	A	0	0.00143781		3.882e-07	Failed HWE
	rs3755137	IGFBP2/IGFBP5	2	217553774	T	A	0.19	0.177746	0.00528355	0.9269
	rs3770472	IGFBP2/IGFBP5	2	217558735	G	A	0.24	0.26475	0.559352	0.02146	Missing >20%
	rs3770473	IGFBP2/IGFBP5	2	217498839	C	A	0.3	0.32963	0.918633	0.1781	Missing >20%
	rs4674107	IGFBP2/IGFBP5	2	217536354	C	A	0.3	0.285148	0.00634026	0.7422
	rs6413492	IGFBP2/IGFBP5	2	217528951	A	T	0.03	0.0374101	0.00105671	0.7188
	rs6727330	IGFBP2/IGFBP5	2	217563445			0.36				Failed genotyping
	rs741384	IGFBP2/IGFBP5	2	217551954	C	G	0.5	0.47815	0.0109193	0.004916
	rs7426116	IGFBP2/IGFBP5	2	217550570	G	C	0.31	0.294975	0.0154984	0.5594
	rs7603372	IGFBP2/IGFBP5	2	217505337	G	A	0.39	0.352792	0.0112716	0.953
	rs888186	IGFBP2/IGFBP5	2	217567718	G	A	0.08	0.0946043	0.00281789	0.1574
	rs9341105	IGFBP2/IGFBP5	2	217500819	G	A	0.28	0.256195	0.02677	0.7771
	rs9341130	IGFBP2/IGFBP5	2	217506265	G	A	0.1	0.0883201	0.00317013	0.6193
	rs9341145	IGFBP2/IGFBP5	2	217511100	A	G	0.08	0.0603976	0.0574146	1
	rs9341156	IGFBP2/IGFBP5	2	217514771	A	G	0	0.0408237	0.00774921	0.07396
	rs9341191	IGFBP2/IGFBP5	2	217521648	A	G	0.07	0.0567121	0.00105671	0.619
	rs11977526	IGFBP3	7	46008110	A	G	0.4	0.423521	0.00457908	0.2063
	rs12671484	IGFBP3	7	45947155			0.14				Failed genotyping
	rs12702181	IGFBP3	7	45945469	G	A	0.39	0.357611	0.0183163	0.1772
	rs13223993	IGFBP3	7	45951230	A	G	0.22	0.215368	0.00528355	0.2039
	rs2132570	IGFBP3	7	45962463	A	C	0.21	0.207111	0.0246566	0.3647
	rs2132571	IGFBP3	7	45961674	A	G	0.33	0.308791	0.0169074	0.8993
	rs2132572	IGFBP3	7	45961545	A	G	0.21	0.182174		4.78e-05	Failed HWE
	rs2270628	IGFBP3	7	45949570	A	G	0.2	0.191334	0.0616414	1
	rs2453839	IGFBP3	7	45953573	G	A	0.19	0.202097	0.00774921	0.08015
	rs2453840	IGFBP3	7	45953812			0.18				Failed genotyping
	rs2471551	IGFBP3	7	45957055	C	G	0.22	0.206846	0.0137372	0.9346
	rs2854744	IGFBP3	7	45961075			0.46				Failed genotyping
	rs2854747	IGFBP3	7	45959917	G	A	0.43	0.394428	0.0211342	0.865
	rs2960436	IGFBP3	7	45977282			0.46				Failed genotyping
	rs3110697	IGFBP3	7	45955029	A	G	0.43	0.408291	0.0228954	0.161
	rs6670	IGFBP3	7	45952254	T	A	0.22	0.206897	0.0225431	0.9342
	rs903889	IGFBP3	7	45964995	C	A	0.21	0.209294	0.00281789	0.2559
	rs924140	IGFBP3	7	45963114	A	G	0.46	0.466519	0.0211342	0.4455
	rs9282734	IGFBP3	7	45956969	C	A	0	0.00763636		3.815e-05	Failed HWE
	Cell cycle
	rs11667200	BAX	19	49455925	A	T	0.11	0.114388	0.00281789	0.02384
	rs11667229	BAX	19	49456001	G	A	0.44	0.453299	0.0443818	0.1696
	rs11667351	BAX	19	49456154	C	A	0.12	0.131522	0.00810144	0.003034
	rs1805419	BAX	19	49459104	A	G	0.28	0.27721	0.0158507	1
	rs4645878	BAX	19	49457938			0.1				Failed genotyping
	rs4645887	BAX	19	49459876	T	A	0.38	0.389635	0.0348714	0.1516
	rs905238	BAX	19	49465384	G	A	0.48	0.457295	0.805213	0.4016	Missing >20%
	rs918546	BAX	19	49465960	C	A	0.46	0.470373	0.0221909	0.4806
	rs1381547	BCL2A1	18	60957339	G	A	0.03	0.0264317	0.38112	0.02157	Missing >20%
	rs1801018	BCL2A1	18	60985879	G	A	0.48	0.411404	0.2441	0.5261	Missing >20%
	rs2279115	BCL2A1	18	60986837			0.43				Failed genotyping
	rs2849380	BCL2A1	18	60979360			0.21				Failed genotyping
	rs2850764	BCL2A1	18	60993515	C	G	0.29	0.307081	0.0066925	0.7523
	rs3826007	BCL2A1	15	80263217	A	G	0.25	0.253064	0.00457908	0.3939
	rs10110283	C-MYC region/POU5F1P1	8	128752178	A	G	0.03	0.0226782	0.00352237	0.5129
	rs10505505	C-MYC region/POU5F1P1	8	128739771	C	A	0.06	0.0479452	0.00317013	0.2416
	rs10956383	C-MYC region/POU5F1P1	8	128763295	G	A	0.21	0.210124	0.0137372	0.05063
	rs12680047	C-MYC region/POU5F1P1	8	128758861	G	A	0.37	0.375831	0.0264178	0.3545
	rs16902359	C-MYC region/POU5F1P1	8	128742851	A	G	0.14	0.111871	0.00317013	0.223
	rs16902364	C-MYC region/POU5F1P1	8	128745266	C	A	0.05	0.0298561	0.00105671	0.3485
	rs17187428	C-MYC region/POU5F1P1	8	128746344	A	G	0.07	0.0619082	0.0158507	0.8146
	rs3891248	C-MYC region/POU5F1P1	8	128750139	T	A	0.17	0.131245	0.0334625	0.3385
	rs4645943	C-MYC region/POU5F1P1	8	128747471	A	G	0.05	0.036193	0.748503	0.3861	Missing >20%
	rs4645946	C-MYC region/POU5F1P1	8	128748385	A	G	0.02	0.0158501	0.00317013	1
	rs4645948	C-MYC region/POU5F1P1	8	128748498	A	G	0.02	0.0210603		3.971e-18	Failed HWE
	rs4645959	C-MYC region/POU5F1P1	8	128750540			0.05				Failed genotyping
	rs4733550	C-MYC region/POU5F1P1	8	128763162	A	T	0.5	0.501096	0.0172596	0.1598
	rs6983267	C-MYC region/POU5F1P1	8	128413305	A	C	0.5	0.495604	0.0295879	0.5515
	rs7013527	C-MYC region/POU5F1P1	8	128743929	C	A	0.02	0.012931	0.000352237	0.001207
	rs7014346	C-MYC region/POU5F1P1	8	128424792	A	G	0.34	0.356773	0.034167	1
	rs1352075	CCND1	11	69457293	A	G	0.49	0.478469	0.108841	0.1135
	rs3212891	CCND1	11	69465507	C	A	0.41	0.427117	0.142656	0.9535
	rs7178	CCND1	11	69469030	G	A	0.09	0.0704777	0.0898204	0.05322
	rs9344	CCND1	11	69462910	A	G	0.5	0.477698	0.00211342	0.5543
	rs1321311	CDKN1A	6	36622900	A	C	0.22	0.236357	0.0796055	0.07752
	rs1801270	CDKN1A	6	36651971	A	C	0.07	0.0715313	0.00211342	0.06472
	rs1977172	CDKN1A	6	36641754	A	C	0.14	0.132184	0.000352237	0.6418
	rs3829963	CDKN1A	6	36644386	A	C	0.15	0.14725	0.00810144	0.4536
	rs9470361	CDKN1A	6	36623379	A	G	0.22	0.241655	0.00986263	0.9414
	rs1009392	FOS (c-fos)	14	75755192	G	A	0.14	0.132883	0.663966	0.097	Missing >20%
	rs10133595	FOS (c-fos)	14	75753133	A	G	0.06	0.0604752	0.00281789	0.4766
	rs1046117	FOS (c-fos)	14	75746690			0.28				Failed genotyping
	rs1063169	FOS (c-fos)	14	75747118	A	C	0.15	0.155259	0.00211342	0.306
	rs12895416	FOS (c-fos)	14	75758122	A	G	0.34	0.333091	0.013385	0.145
	rs1569328	FOS (c-fos)	14	75741751	A	G	0.16	0.157174	0.00422684	0.3121
	rs3742769	FOS (c-fos)	14	75758885	A	G	0.18	0.174525	0.0588235	0.08549
	rs4645856	FOS (c-fos)	14	75747258	G	A	0.06	0.0612701	0.245509	1	Missing >20%
	rs4645874	FOS (c-fos)	14	75750200	A	G	0.12	0.110949	0.0165551	0.6828
	rs4645877	FOS (c-fos)	14	75750319	G	A	0.05	0.0457163	0.00281789	0.2053
	rs6574222	FOS (c-fos)	14	75758302	G	C	0.21	0.211152	0.0471997	0.5668
	rs7101	FOS (c-fos)	14	75745626	G	A	0.26	0.319444		1.956e-08	Failed HWE
	rs7146378	FOS (c-fos)	14	75756803	A	G	0.04	0.0333333	0.00880592	1
	rs7154366	FOS (c-fos)	14	75754010	A	G	0.11	0.0937267	0.032758	0.7467
	rs11207306	JUN	1	59258879	A	G	0.29	0.270737	0.0619937	0.1406
	rs11688	JUN	1	59247993	A	G	0.04	0.0486436	0.241282	0.09952	Missing >20%
	rs12738233	JUN	1	59240954	A	G	0.25	0.279465	0.00598802	0.8938
	rs2104259	JUN	1	59252054	C	G	0.37	0.399419	0.0126805	0.4316
	rs2760496	JUN	1	59242028	C	A	0.31	0.272694	0.00845368	0.08942
	rs2811888	JUN	1	59238729	G	A	0.1	0.106515	0.0225431	0.1179
	rs2984915	JUN	1	59253695	A	G	0.08	0.0622302	0.00317013	0.8162
	rs6677589	JUN	1	59230033	G	A	0.35	0.359827	0.00563579	0.4146
	rs10505980	KRAS	12	25392443	A	G	0.39	0.307143	0.914406	1	Missing >20%
	rs10842508	KRAS	12	25371462	A	G	0.26	0.239606	0.0154984	0.1818
	rs10842513	KRAS	12	25384658			0.09				Failed genotyping
	rs10842514	KRAS	12	25392282	A	G	0.43	0.489846		3.964e-05	Failed HWE
	rs10842515	KRAS	12	25393523	G	A	0.22	0.210161	0.013385	0.1217
	rs11047921	KRAS	12	25408047	A	C	0.07	0	0.00598802	1	Constant
	rs12320328	KRAS	12	25408464	G	A	0.09	0.0752727	0.00951039	1
	rs12579073	KRAS	12	25375799	C	A	0.49	0.474041	0.0405072	0.3503
	rs12813551	KRAS	12	25394779	G	A	0.4	0.361184	0.179993	0.0049
	rs17329025	KRAS	12	25383813	G	A	0.43	0.459298	0.0345192	0.2261
	rs17329424	KRAS	12	25391064	C	A	0.16	0.135636	0.0109193	0.1338
	rs17388148	KRAS	12	25382186	C	A	0.1	0.10307	0.0232476	0.1879
	rs17388587	KRAS	12	25389220	G	A	0.06	0.0600145	0.0066925	0.3344
	rs17388893	KRAS	12	25393865	C	A	0.07	0.0543718	0.0186685	0.5926
	rs4963857	KRAS	12	25356400	A	G	0.12	0.101652	0.00176118	0.3023
	rs7315339	KRAS	12	25401701	G	A	0.29	0.272295	0.0183163	0.0244
	rs7960917	KRAS	12	25361646			0.22				Failed genotyping
	rs7973746	KRAS	12	25391239	G	C	0.17	0.133407	0.0588235	0.8141

## Sheet: Supplementary Table 2
Supplementary Table 2. Vitamin D metabolism and transcriptional activity-related SNPs associated (unadjusted P-value <0.05) with season-adjusted 25(OH)D concentrations among controls, the EPIC study, 1992-2003.
Gene	SNP	N	25(OH)D, β (95% CI)*	P	P BH
Genes involved in vitamin D metabolism
CUBN	rs10904839	758	3.64 (0.61,6.66)	0.019	0.974
	rs10904881	760	2.76 (0.30,5.22)	0.028	0.974
	rs10904883	759	-2.87 (-5.59,-0.15)	0.039	0.974
	rs2271461	762	3.64 (0.58,6.71)	0.02	0.974
	rs4525114	750	7.11 (1.94,12.29)	0.007	0.949
	rs7096079	697	-2.67 (-5.15,-0.19)	0.036	0.974
CYP24A1	rs2762926	707	-2.76 (-5.31,-0.22)	0.033	0.974
CYP27B1	rs10877013	764	3.42 (0.73,6.12)	0.013	0.974
	rs4646536	751	3.65 (0.93,6.37)	0.009	0.949
GC	rs1352844	747	5.26 (1.63,8.88)	0.005	0.949
	rs188812	752	5.38 (1.57,9.20)	0.006	0.949
	rs2298849	757	4.26 (1.11,7.41)	0.008	0.949
LRP2	rs2673170	747	-4.43 (-7.27,-1.58)	0.002	0.949
	rs35853478	760	6.33 (0.22,12.45)	0.043	0.974
	rs6718884	754	5.58 (0.33,10.83)	0.038	0.974
VDR	rs2107301	757	-3.28 (-5.98,-0.58)	0.018	0.974
	rs2239182	742	-3.82 (-6.15,-1.49)	0.001	0.949
Genes involved in vitamin D transcriptional activity (genomic effects)
BAZ1B	rs12056034	742	4.52 (0.38,8.65)	0.033	0.974
	rs2074755	758	4.67 (0.68,8.65)	0.022	0.974
	rs6460043	745	14.94 (0.86,29.02)	0.038	0.974
CHAF1A	rs243341	757	-3.12 (-5.73,-0.50)	0.02	0.974
	rs243352	755	2.86 (0.36,5.37)	0.025	0.974
	rs9352	757	2.86 (0.35,5.37)	0.026	0.974
CREBBP	rs130024	756	5.39 (0.27,10.50)	0.039	0.974
HDAC9	rs212669	753	-8.12 (-14.34,-1.90)	0.011	0.974
NCOA1	rs13004818	736	-2.55 (-5.05,-0.06)	0.045	0.974
NCOA2	rs17676138	757	3.81 (0.27,7.36)	0.035	0.974
NCOA7	rs579477	758	-3.57 (-6.07,-1.07)	0.005	0.949
NCOR2	rs10773085	763	3.95 (0.84,7.06)	0.013	0.974
	rs11057637	762	4.81 (0.62,9.00)	0.025	0.974
	rs7963151	761	4.35 (0.50,8.21)	0.027	0.974
RXRA	rs3118523	758	3.41 (0.37,6.44)	0.028	0.974
RXRB	rs1050673	743	-2.80 (-5.45,-0.15)	0.039	0.974
SMARCA2	rs2296212	756	-4.37 (-8.46,-0.28)	0.037	0.974
SNW1	rs11624704	749	3.93 (0.24,7.62)	0.037	0.974
	rs17752707	764	-6.55 (-12.08,-1.01)	0.021	0.974
TSC2	rs3087631	756	3.28 (0.22,6.34)	0.036	0.974
*Adjusted for age, sex, and center.

## Sheet: Supplementary Table 3A
	Supplemental Table 3A. Associations between SNPs in the genes involved in the vitamin D metabolism, mineral homeostasis/endocrine regulation of 1,25(OH)2D synthesis, and vitamin D transcriptional activity with season-adjusted 25(OH)D concentrations among controls.
	Gene	SNP	N	25(OH)D, β (95% CI)*	P	P BH
	ACTL6A	rs10513762	764	-2.23 (-6.95,2.48)	0.353132	0.973724
		rs2339843	764	-2.79 (-10.03,4.45)	0.449681	0.973724
		rs9816801	754	0.73 (-1.81,3.27)	0.572925	0.973724
	ARID1A	rs11247593	759	-0.35 (-3.29,2.58)	0.812511	0.979468
		rs11247596	764	2.04 (-0.97,5.05)	0.183831	0.973724
		rs12025634	762	-0.20 (-3.78,3.39)	0.91415	0.991233
		rs12737946	764	-3.26 (-7.56,1.04)	0.137681	0.973724
		rs12752833	763	-3.21 (-7.53,1.11)	0.146028	0.973724
		rs17262006	762	2.91 (-1.76,7.59)	0.222722	0.973724
		rs4466675	747	1.52 (-1.13,4.17)	0.262128	0.973724
		rs6666121	761	-0.70 (-3.24,1.84)	0.5904	0.973724
	BAZ1B	rs10275549	752	-0.16 (-3.28,2.96)	0.919939	0.991233
		rs1178977	736	3.23 (-0.08,6.54)	0.0564652	0.973724
		rs1178979	764	2.79 (-0.45,6.03)	0.091719	0.973724
		rs11983997	762	2.42 (-0.89,5.73)	0.152125	0.973724
		rs12056034	742	4.52 (0.38,8.65)	0.0325778	0.973724
		rs17145713	762	2.45 (-0.83,5.72)	0.144249	0.973724
		rs17145717	752	-3.17 (-8.63,2.29)	0.25586	0.973724
		rs17145721	761	-2.81 (-7.63,2.01)	0.253694	0.973724
		rs17400042	750	-0.59 (-8.50,7.32)	0.88431	0.991233
		rs2074755	758	4.67 (0.68,8.65)	0.0219168	0.973724
		rs2353082	744	-1.37 (-4.17,1.44)	0.34058	0.973724
		rs4640941	757	-1.52 (-4.24,1.20)	0.273659	0.973724
		rs6460043	745	14.94 (0.86,29.02)	0.0378834	0.973724
		rs714052	761	3.38 (-0.60,7.36)	0.0967524	0.973724
	CALB1	rs16902897	761	-3.48 (-10.94,3.99)	0.361639	0.973724
		rs1800645	751	0.90 (-1.95,3.75)	0.534901	0.973724
	CARM1	rs11667234	763	-3.94 (-10.63,2.74)	0.247923	0.973724
		rs4804543	749	-0.39 (-2.95,2.17)	0.76312	0.973724
		rs7254708	667	-3.67 (-7.85,0.52)	0.0862028	0.973724
		rs892011	760	-0.51 (-3.28,2.27)	0.721121	0.973724
	CASR	rs1042636	764	1.87 (-1.76,5.50)	0.312804	0.973724
		rs10934582	758	-0.17 (-2.84,2.49)	0.897835	0.991233
		rs1354162	758	3.67 (-0.09,7.43)	0.0561671	0.973724
		rs1393198	745	-1.16 (-5.04,2.72)	0.557828	0.973724
		rs1463892	724	0.43 (-2.52,3.38)	0.774156	0.973724
		rs1501900	680	1.81 (-1.69,5.30)	0.310748	0.973724
		rs17282008	764	-0.32 (-3.12,2.48)	0.8215	0.981738
		rs17282015	758	-0.43 (-3.00,2.15)	0.745779	0.973724
		rs17282022	756	-2.38 (-4.86,0.10)	0.0599894	0.973724
		rs1847029	763	-0.34 (-2.98,2.30)	0.802215	0.979468
		rs2134224	757	-0.62 (-4.09,2.84)	0.723988	0.973724
		rs2173961	754	1.01 (-1.84,3.85)	0.488189	0.973724
		rs2202127	759	-1.39 (-4.02,1.25)	0.303124	0.973724
		rs3792290	757	-1.10 (-4.83,2.63)	0.56481	0.973724
		rs3845917	763	-0.67 (-3.78,2.43)	0.670614	0.973724
		rs4678029	748	-2.66 (-5.78,0.45)	0.0944226	0.973724
		rs4678031	762	-1.41 (-5.00,2.18)	0.440905	0.973724
		rs4678176	761	0.31 (-4.34,4.95)	0.896207	0.991233
		rs6776158	756	-0.23 (-2.90,2.43)	0.865443	0.991233
		rs7635112	760	2.96 (-0.81,6.73)	0.12373	0.973724
		rs7639847	754	-1.04 (-4.18,2.11)	0.51814	0.973724
		rs7644981	761	2.92 (-0.84,6.67)	0.128624	0.973724
		rs7647405	760	1.92 (-4.35,8.20)	0.548071	0.973724
		rs7647446	746	-1.67 (-5.42,2.08)	0.382518	0.973724
		rs7648041	756	-2.86 (-9.06,3.35)	0.367197	0.973724
		rs937625	743	0.23 (-4.79,5.26)	0.927071	0.991233
		rs9740	759	1.11 (-1.48,3.71)	0.401017	0.973724
		rs9814524	759	-0.83 (-3.98,2.32)	0.605376	0.973724
		rs9820206	737	-0.47 (-3.67,2.72)	0.771773	0.973724
		rs9826770	762	-2.57 (-8.09,2.94)	0.360677	0.973724
		rs9875101	744	0.50 (-2.36,3.37)	0.730586	0.973724
	CHAF1A	rs11668886	761	0.14 (-2.72,2.99)	0.925506	0.991233
		rs243341	757	-3.12 (-5.73,-0.50)	0.0196092	0.973724
		rs243352	755	2.86 (0.36,5.37)	0.025205	0.973724
		rs243365	735	-2.51 (-5.48,0.46)	0.0980224	0.973724
		rs9352	757	2.86 (0.35,5.37)	0.0255396	0.973724
	CREBBP	rs11076787	723	-2.57 (-5.69,0.56)	0.107791	0.973724
		rs1296720	763	-1.87 (-4.92,1.19)	0.231303	0.973724
		rs129963	737	-1.01 (-3.59,1.56)	0.441423	0.973724
		rs129968	760	-1.60 (-4.25,1.05)	0.237437	0.973724
		rs130005	754	-0.41 (-4.53,3.71)	0.844295	0.988609
		rs130021	759	1.22 (-1.44,3.87)	0.369518	0.973724
		rs130023	757	-1.19 (-8.23,5.85)	0.74084	0.973724
		rs130024	756	5.39 (0.27,10.50)	0.039237	0.973724
		rs2239316	741	1.70 (-1.30,4.69)	0.266932	0.973724
		rs2239317	759	-1.66 (-5.86,2.55)	0.440777	0.973724
		rs2530890	705	-2.43 (-5.74,0.87)	0.149225	0.973724
		rs39733	741	1.25 (-1.54,4.05)	0.38003	0.973724
		rs8046065	754	3.35 (-0.50,7.20)	0.0883661	0.973724
		rs886528	753	-1.35 (-3.91,1.21)	0.301868	0.973724
		rs9392	750	-1.85 (-4.80,1.09)	0.218375	0.973724
	CUBN	rs1033765	747	-0.14 (-3.97,3.68)	0.941665	0.991233
		rs10508518	738	0.42 (-2.29,3.13)	0.759491	0.973724
		rs10752062	729	-0.90 (-3.63,1.83)	0.520014	0.973724
		rs10795433	758	2.59 (-0.65,5.83)	0.117055	0.973724
		rs10795440	754	0.47 (-2.70,3.64)	0.769399	0.973724
		rs10795445	763	1.34 (-2.15,4.83)	0.451181	0.973724
		rs10904824	762	-2.08 (-6.29,2.14)	0.334377	0.973724
		rs10904833	752	-0.17 (-2.67,2.34)	0.896566	0.991233
		rs10904839	758	3.64 (0.61,6.66)	0.0186792	0.973724
		rs10904851	743	1.45 (-1.21,4.11)	0.284553	0.973724
		rs10904855	762	-1.05 (-3.75,1.65)	0.446422	0.973724
		rs10904861	750	0.70 (-1.94,3.33)	0.603902	0.973724
		rs10904865	752	1.40 (-3.85,6.64)	0.602032	0.973724
		rs10904881	760	2.76 (0.30,5.22)	0.0284095	0.973724
		rs10904883	759	-2.87 (-5.59,-0.15)	0.0387797	0.973724
		rs11254227	758	2.93 (-4.40,10.26)	0.433752	0.973724
		rs11254232	760	-1.25 (-5.75,3.24)	0.585257	0.973724
		rs11254237	762	2.51 (-3.16,8.19)	0.385756	0.973724
		rs11254275	759	0.31 (-2.29,2.91)	0.813814	0.979468
		rs11254284	759	-0.66 (-3.31,1.98)	0.623607	0.973724
		rs11254337	747	-0.55 (-3.85,2.75)	0.744755	0.973724
		rs11254339	758	-1.08 (-4.95,2.79)	0.584424	0.973724
		rs11254351	762	0.08 (-4.56,4.73)	0.972398	0.991233
		rs11254363	734	2.19 (-0.71,5.09)	0.139495	0.973724
		rs11254375	757	-0.93 (-3.63,1.78)	0.500859	0.973724
		rs11254389	715	-2.12 (-5.69,1.45)	0.245619	0.973724
		rs11591606	764	0.67 (-2.58,3.91)	0.687389	0.973724
		rs11591673	759	-0.20 (-2.98,2.57)	0.885324	0.991233
		rs11591878	678	-2.37 (-6.67,1.94)	0.281314	0.973724
		rs11592014	751	-0.49 (-3.07,2.09)	0.710826	0.973724
		rs11595961	738	-4.20 (-9.92,1.51)	0.150167	0.973724
		rs11814420	758	-0.10 (-2.65,2.46)	0.940905	0.991233
		rs12146272	761	-0.28 (-2.84,2.29)	0.833485	0.985186
		rs12243365	748	-0.20 (-3.41,3.00)	0.900564	0.991233
		rs12243895	745	0.66 (-2.12,3.44)	0.643496	0.973724
		rs12244831	753	0.00 (-2.86,2.86)	0.998343	0.998343
		rs12254816	747	-2.24 (-6.38,1.91)	0.290741	0.973724
		rs12255119	758	-0.52 (-3.65,2.60)	0.742447	0.973724
		rs12258009	763	0.91 (-2.55,4.36)	0.606601	0.973724
		rs12263745	742	1.41 (-1.25,4.07)	0.298773	0.973724
		rs12414709	756	-1.07 (-5.03,2.88)	0.594292	0.973724
		rs12766939	757	1.05 (-1.80,3.91)	0.469575	0.973724
		rs1276721	764	-1.61 (-4.76,1.54)	0.316783	0.973724
		rs1398431	764	0.10 (-4.13,4.33)	0.962016	0.991233
		rs1512706	741	1.78 (-5.93,9.48)	0.651539	0.973724
		rs1687696	705	0.83 (-1.77,3.43)	0.532887	0.973724
		rs1707285	706	-1.37 (-4.02,1.28)	0.310714	0.973724
		rs17336476	739	-1.27 (-8.21,5.68)	0.720596	0.973724
		rs17426570	746	1.39 (-3.71,6.48)	0.59409	0.973724
		rs17431426	758	-0.53 (-3.91,2.84)	0.756932	0.973724
		rs17431739	763	-1.60 (-10.38,7.18)	0.72131	0.973724
		rs1801224	757	1.10 (-1.52,3.72)	0.409204	0.973724
		rs1801230	759	2.31 (-6.04,10.67)	0.587275	0.973724
		rs1801231	763	0.92 (-3.14,4.98)	0.655626	0.973724
		rs1801239	741	1.20 (-2.68,5.07)	0.545702	0.973724
		rs1877479	747	-0.43 (-2.98,2.12)	0.743283	0.973724
		rs1907368	756	0.78 (-1.78,3.33)	0.551518	0.973724
		rs1914172	760	-0.31 (-2.90,2.27)	0.811384	0.979468
		rs1996317	733	0.62 (-1.97,3.22)	0.637713	0.973724
		rs2271460	764	10.82 (-0.98,22.62)	0.0725982	0.973724
		rs2271461	762	3.64 (0.58,6.71)	0.0200855	0.973724
		rs2271469	620	1.32 (-1.27,3.92)	0.317269	0.973724
		rs2273737	735	-0.88 (-5.06,3.30)	0.679791	0.973724
		rs2281649	761	0.82 (-2.40,4.04)	0.619305	0.973724
		rs2356215	761	0.49 (-3.30,4.27)	0.801257	0.979468
		rs2356590	762	-3.25 (-15.89,9.39)	0.614292	0.973724
		rs2603794	761	0.79 (-2.48,4.06)	0.636178	0.973724
		rs2603796	758	0.89 (-1.70,3.47)	0.501188	0.973724
		rs2603804	760	0.14 (-3.61,3.90)	0.940656	0.991233
		rs2669154	743	-0.45 (-2.95,2.05)	0.724713	0.973724
		rs2942366	752	0.62 (-1.92,3.16)	0.630207	0.973724
		rs3012479	758	0.38 (-2.25,3.00)	0.778365	0.973724
		rs3012501	749	-0.40 (-3.57,2.77)	0.803333	0.979468
		rs3740168	747	1.42 (-9.87,12.70)	0.805853	0.979468
		rs3847368	759	-2.37 (-5.75,1.01)	0.169427	0.973724
		rs4082518	764	-1.35 (-4.51,1.81)	0.401619	0.973724
		rs41289305	757	-1.65 (-4.88,1.58)	0.317971	0.973724
		rs41335345	747	-2.15 (-5.53,1.23)	0.212012	0.973724
		rs4335444	764	-1.18 (-3.71,1.34)	0.359012	0.973724
		rs4525114	750	7.11 (1.94,12.29)	0.00720699	0.948609
		rs45474496	754	-0.04 (-7.05,6.97)	0.991954	0.996536
		rs45551835	763	-0.11 (-11.74,11.51)	0.985018	0.991954
		rs4747284	755	0.65 (-2.85,4.15)	0.71641	0.973724
		rs4747290	762	-0.43 (-3.03,2.17)	0.745874	0.973724
		rs4748340	762	1.06 (-1.45,3.58)	0.406532	0.973724
		rs4748344	753	1.27 (-1.62,4.15)	0.389277	0.973724
		rs62619939	736	3.09 (-1.03,7.21)	0.141646	0.973724
		rs6602171	735	-1.90 (-5.07,1.26)	0.2387	0.973724
		rs6602177	754	1.12 (-1.58,3.81)	0.416764	0.973724
		rs703060	631	0.33 (-2.33,2.99)	0.807648	0.979468
		rs703075	751	0.46 (-2.17,3.10)	0.729738	0.973724
		rs7071215	751	0.42 (-2.18,3.02)	0.751357	0.973724
		rs7075681	732	-2.11 (-5.37,1.14)	0.203176	0.973724
		rs7082270	750	0.98 (-2.70,4.67)	0.601618	0.973724
		rs7090658	760	0.26 (-2.18,2.70)	0.834855	0.985186
		rs7096079	697	-2.67 (-5.15,-0.19)	0.0355282	0.973724
		rs7097054	754	0.99 (-5.53,7.50)	0.766994	0.973724
		rs7100290	760	-1.42 (-6.29,3.45)	0.568335	0.973724
		rs780635	666	0.65 (-2.25,3.54)	0.661702	0.973724
		rs780829	760	-0.53 (-3.16,2.11)	0.695701	0.973724
		rs780837	726	-2.57 (-5.41,0.27)	0.0770178	0.973724
		rs780846	762	-0.90 (-3.70,1.89)	0.526456	0.973724
		rs780847	754	-2.04 (-4.93,0.86)	0.168125	0.973724
		rs7893395	740	-1.36 (-4.42,1.69)	0.382204	0.973724
		rs7896674	763	-0.05 (-2.82,2.73)	0.974497	0.991233
		rs7897704	761	2.39 (-0.92,5.69)	0.15767	0.973724
		rs7898138	759	0.45 (-2.11,3.01)	0.729916	0.973724
		rs7900527	754	0.27 (-3.03,3.57)	0.873562	0.991233
		rs7904579	754	0.81 (-1.78,3.40)	0.538862	0.973724
		rs7906242	757	0.87 (-1.63,3.38)	0.494801	0.973724
		rs7914868	743	-0.89 (-3.54,1.76)	0.511556	0.973724
		rs7916688	745	1.60 (-1.18,4.38)	0.258733	0.973724
		rs7918815	731	0.71 (-2.03,3.45)	0.612201	0.973724
		rs7922356	756	-1.43 (-5.04,2.18)	0.437801	0.973724
		rs9633766	744	0.23 (-2.30,2.75)	0.861405	0.991233
		rs994715	759	1.11 (-2.26,4.47)	0.519921	0.973724
	CYP24A1	rs1570669	748	-0.94 (-3.66,1.79)	0.499593	0.973724
		rs2181874	763	0.70 (-2.18,3.58)	0.632641	0.973724
		rs2209314	756	0.67 (-2.16,3.51)	0.641806	0.973724
		rs2248359	736	-0.14 (-2.79,2.52)	0.919416	0.991233
		rs2296239	762	-1.29 (-4.35,1.77)	0.409452	0.973724
		rs2426498	748	0.58 (-3.08,4.24)	0.75653	0.973724
		rs2585413	703	-2.11 (-4.94,0.71)	0.14335	0.973724
		rs2585415	758	-1.49 (-4.06,1.09)	0.258404	0.973724
		rs2585424	737	-2.91 (-7.24,1.41)	0.187391	0.973724
		rs2585428	761	0.77 (-1.71,3.24)	0.543891	0.973724
		rs2762926	707	-2.76 (-5.31,-0.22)	0.0333816	0.973724
		rs2762929	755	-1.10 (-3.68,1.47)	0.401205	0.973724
		rs2762932	763	0.32 (-3.05,3.68)	0.85428	0.990114
		rs2762934	753	0.12 (-3.02,3.25)	0.942001	0.991233
		rs2762941	758	-2.25 (-4.83,0.34)	0.0889952	0.973724
		rs3787554	764	1.69 (-2.41,5.79)	0.418984	0.973724
		rs4809956	743	-1.38 (-4.52,1.77)	0.391973	0.973724
		rs4809958	764	-2.17 (-5.54,1.20)	0.207839	0.973724
		rs4809960	763	0.29 (-2.53,3.12)	0.838543	0.985186
		rs6068810	764	-3.54 (-9.75,2.68)	0.265149	0.973724
		rs6068816	763	-1.74 (-5.87,2.40)	0.411351	0.973724
		rs6068821	739	-0.44 (-2.93,2.05)	0.728073	0.973724
		rs6097801	754	-2.87 (-6.39,0.64)	0.109828	0.973724
		rs6097807	741	-0.73 (-3.61,2.15)	0.620228	0.973724
		rs927650	706	0.66 (-1.91,3.24)	0.614608	0.973724
		rs11677711	759	3.45 (-3.08,9.97)	0.301033	0.973724
		rs4674338	757	0.46 (-2.08,3.00)	0.723719	0.973724
		rs647952	763	0.45 (-4.20,5.09)	0.850311	0.990114
		rs7600248	762	15.87 (-32.24,63.98)	0.518196	0.973724
		rs7603709	759	0.01 (-2.49,2.50)	0.996796	0.998343
	CYP27B1	rs10877013	764	3.42 (0.73,6.12)	0.0129881	0.973724
		rs4646536	751	3.65 (0.93,6.37)	0.00872284	0.948609
		rs4646537	764	-1.39 (-7.61,4.83)	0.661858	0.973724
		rs773643	763	-0.13 (-4.72,4.47)	0.957106	0.991233
		rs773649	755	0.27 (-3.80,4.34)	0.897632	0.991233
		rs8176345	764	31.84 (-2.09,65.77)	0.0663144	0.973724
	CYP2R1	rs10766197	748	-1.50 (-3.98,0.98)	0.235124	0.973724
		rs10832313	762	-1.66 (-6.00,2.68)	0.454152	0.973724
		rs11023371	761	-0.38 (-5.65,4.90)	0.888581	0.991233
		rs11023374	752	-1.42 (-4.11,1.26)	0.298756	0.973724
		rs11819875	742	0.70 (-2.41,3.80)	0.659875	0.973724
		rs12794714	751	-2.05 (-4.51,0.42)	0.104046	0.973724
		rs1553006	761	1.13 (-1.34,3.60)	0.370896	0.973724
		rs1562902	759	1.12 (-1.36,3.60)	0.377568	0.973724
		rs16930609	724	3.29 (-1.25,7.84)	0.155587	0.973724
		rs16930625	751	0.82 (-3.31,4.95)	0.695672	0.973724
		rs1993116	749	1.85 (-0.74,4.44)	0.162247	0.973724
		rs2060793	757	2.21 (-0.38,4.80)	0.0943295	0.973724
	CYP3A4	rs1851426	762	-3.71 (-10.23,2.81)	0.264999	0.973724
		rs2242480	756	-1.55 (-5.76,2.65)	0.470036	0.973724
		rs2724112	739	0.97 (-1.60,3.55)	0.458812	0.973724
		rs2740574	764	-2.93 (-9.40,3.54)	0.375156	0.973724
		rs4646437	762	-1.26 (-5.21,2.69)	0.531724	0.973724
		rs4986910	763	5.20 (-7.71,18.11)	0.430068	0.973724
		rs6964587	760	-0.65 (-3.25,1.95)	0.623088	0.973724
	DHCR7	rs1044482	763	-0.72 (-3.42,1.98)	0.602322	0.973724
		rs12785878	760	-0.59 (-3.32,2.15)	0.674709	0.973724
		rs12800438	758	-0.85 (-3.58,1.89)	0.544561	0.973724
		rs1790349	764	-0.93 (-4.07,2.22)	0.563101	0.973724
		rs1792272	761	-2.84 (-10.57,4.88)	0.470858	0.973724
		rs2002064	759	-0.50 (-3.36,2.36)	0.730176	0.973724
		rs3794060	745	-0.47 (-3.27,2.33)	0.742887	0.973724
		rs4944957	761	-0.70 (-3.44,2.05)	0.619019	0.973724
		rs4945008	749	-0.82 (-3.57,1.94)	0.560734	0.973724
		rs7944926	748	-1.07 (-3.82,1.68)	0.444697	0.973724
		rs909217	685	2.94 (-3.88,9.76)	0.399152	0.973724
		rs949177	757	-1.90 (-7.32,3.51)	0.491132	0.973724
	EP300	rs12628695	764	-1.94 (-6.05,2.17)	0.355793	0.973724
		rs20551	742	0.57 (-2.25,3.39)	0.692769	0.973724
		rs20552	702	-1.23 (-3.78,1.31)	0.341675	0.973724
		rs4820429	762	-1.03 (-3.75,1.69)	0.457512	0.973724
		rs4822002	708	-1.48 (-4.04,1.07)	0.255467	0.973724
		rs5758222	759	1.19 (-1.36,3.74)	0.359409	0.973724
	GC	rs1155563	732	-0.51 (-3.23,2.22)	0.716173	0.973724
		rs12512631	747	-0.81 (-3.44,1.81)	0.543308	0.973724
		rs1352844	747	5.26 (1.63,8.88)	0.00460611	0.948609
		rs1352846	673	-1.16 (-3.99,1.68)	0.425029	0.973724
		rs1491711	762	-0.76 (-3.39,1.87)	0.571436	0.973724
		rs16846876	749	1.01 (-1.66,3.68)	0.45784	0.973724
		rs17383291	764	0.13 (-4.66,4.93)	0.95708	0.991233
		rs17467825	729	-1.07 (-3.82,1.69)	0.448588	0.973724
		rs188812	752	5.38 (1.57,9.20)	0.00586403	0.948609
		rs2070741	762	0.29 (-4.78,5.35)	0.911681	0.991233
		rs222020	764	3.04 (-0.29,6.37)	0.0741804	0.973724
		rs222040	675	-1.16 (-3.86,1.53)	0.398029	0.973724
		rs222046	752	-2.22 (-7.17,2.73)	0.378866	0.973724
		rs222054	755	2.44 (-0.28,5.16)	0.078588	0.973724
		rs2298849	757	4.26 (1.11,7.41)	0.00821317	0.948609
		rs2298850	738	-0.42 (-3.18,2.35)	0.768734	0.973724
		rs3733359	758	-0.51 (-6.41,5.39)	0.865231	0.991233
		rs3755967	720	-0.85 (-3.64,1.94)	0.551706	0.973724
		rs423817	748	0.22 (-2.67,3.11)	0.882027	0.991233
		rs56097748	764	-3.34 (-8.82,2.15)	0.233426	0.973724
		rs705117	764	-0.98 (-4.57,2.61)	0.592792	0.973724
		rs76781122	763	2.63 (-4.38,9.64)	0.46224	0.973724
		rs76803094	763	-5.34 (-12.51,1.83)	0.144789	0.973724
		rs842873	742	-1.45 (-3.90,1.01)	0.248572	0.973724
	GWAS_VD	rs10485165	761	-3.07 (-6.49,0.34)	0.0780513	0.973724
		rs10507577	761	1.53 (-2.20,5.27)	0.421185	0.973724
	HDAC9	rs1005139	751	-0.76 (-3.85,2.32)	0.627905	0.973724
		rs10215908	764	2.24 (-2.50,6.98)	0.354115	0.973724
		rs10227612	758	-1.73 (-4.61,1.16)	0.242054	0.973724
		rs10229062	764	-0.65 (-4.83,3.53)	0.76101	0.973724
		rs10237366	757	2.13 (-0.42,4.68)	0.101594	0.973724
		rs10245874	762	-0.96 (-4.12,2.21)	0.553892	0.973724
		rs10247238	732	-1.28 (-3.99,1.43)	0.356045	0.973724
		rs10248565	757	-1.51 (-5.18,2.16)	0.420075	0.973724
		rs10249700	744	-1.19 (-6.12,3.74)	0.637285	0.973724
		rs10250414	743	0.53 (-1.96,3.02)	0.675933	0.973724
		rs10258269	746	1.69 (-2.42,5.80)	0.420294	0.973724
		rs10259495	753	-0.11 (-4.60,4.39)	0.963267	0.991233
		rs10261308	754	1.07 (-6.40,8.55)	0.778474	0.973724
		rs10261942	750	-1.07 (-3.86,1.73)	0.454681	0.973724
		rs10264011	710	-0.97 (-3.87,1.94)	0.515522	0.973724
		rs10269422	749	1.80 (-0.96,4.56)	0.202312	0.973724
		rs10272295	750	0.31 (-3.18,3.81)	0.860577	0.991233
		rs10272709	745	0.98 (-2.64,4.60)	0.595404	0.973724
		rs10276613	721	0.75 (-2.71,4.20)	0.672466	0.973724
		rs10278449	720	-0.29 (-3.73,3.16)	0.870298	0.991233
		rs10282136	756	0.08 (-2.33,2.49)	0.948628	0.991233
		rs1034805	757	-1.51 (-4.16,1.14)	0.26494	0.973724
		rs10486293	752	2.82 (-0.25,5.89)	0.0723344	0.973724
		rs10486317	719	-0.40 (-3.00,2.20)	0.760459	0.973724
		rs10486323	757	0.14 (-3.86,4.15)	0.944123	0.991233
		rs1117533	728	0.37 (-2.22,2.97)	0.778537	0.973724
		rs11762171	762	1.89 (-2.76,6.53)	0.426509	0.973724
		rs11764116	722	0.17 (-2.88,3.22)	0.913507	0.991233
		rs11764843	705	0.78 (-1.81,3.36)	0.555887	0.973724
		rs1178114	762	0.89 (-1.92,3.70)	0.534862	0.973724
		rs1178118	755	-0.22 (-3.38,2.94)	0.892448	0.991233
		rs1178178	758	0.70 (-2.57,3.97)	0.673376	0.973724
		rs12056282	763	3.28 (-2.80,9.36)	0.290628	0.973724
		rs12533489	746	1.69 (-1.77,5.15)	0.339483	0.973724
		rs12535092	762	-0.71 (-3.59,2.17)	0.629545	0.973724
		rs12669760	747	-2.22 (-5.16,0.71)	0.138138	0.973724
		rs12699985	759	0.66 (-2.13,3.45)	0.642688	0.973724
		rs12699991	761	-0.77 (-3.30,1.77)	0.554893	0.973724
		rs12700003	759	1.41 (-1.10,3.93)	0.270799	0.973724
		rs13234273	762	-0.63 (-4.72,3.45)	0.762067	0.973724
		rs13241157	754	-0.06 (-2.83,2.70)	0.963532	0.991233
		rs13246896	740	0.59 (-2.44,3.61)	0.704858	0.973724
		rs13438248	747	0.85 (-2.38,4.07)	0.607309	0.973724
		rs1405618	756	0.06 (-2.65,2.77)	0.964758	0.991233
		rs1624397	752	-2.43 (-5.39,0.52)	0.106587	0.973724
		rs1633789	761	1.11 (-5.13,7.35)	0.727695	0.973724
		rs16872155	758	0.84 (-1.79,3.47)	0.533503	0.973724
		rs17139546	759	-0.39 (-10.41,9.64)	0.93997	0.991233
		rs17140133	764	-1.96 (-10.45,6.53)	0.651184	0.973724
		rs17140138	763	2.51 (-3.80,8.82)	0.436064	0.973724
		rs17140244	758	-1.41 (-4.26,1.43)	0.329431	0.973724
		rs17140251	750	-0.71 (-6.41,4.99)	0.80735	0.979468
		rs17140345	760	2.61 (-0.65,5.87)	0.117451	0.973724
		rs17140423	761	0.89 (-1.87,3.65)	0.529003	0.973724
		rs1726595	758	-1.61 (-4.08,0.87)	0.203357	0.973724
		rs1726596	747	0.44 (-3.95,4.82)	0.845457	0.988639
		rs1726597	744	0.55 (-2.43,3.53)	0.718026	0.973724
		rs1726610	761	-1.33 (-3.84,1.18)	0.299788	0.973724
		rs17349342	760	0.20 (-2.30,2.70)	0.87467	0.991233
		rs17349832	725	0.76 (-2.39,3.91)	0.636131	0.973724
		rs17350355	748	0.05 (-2.50,2.60)	0.971312	0.991233
		rs17350515	684	-0.08 (-2.88,2.73)	0.956147	0.991233
		rs17432448	754	-0.32 (-2.90,2.25)	0.806629	0.979468
		rs17433095	753	0.17 (-4.72,5.06)	0.944739	0.991233
		rs17433319	749	2.22 (-1.67,6.12)	0.263022	0.973724
		rs17435661	761	3.40 (-1.43,8.23)	0.167868	0.973724
		rs2051920	764	1.34 (-1.42,4.11)	0.34223	0.973724
		rs2073973	759	1.45 (-1.04,3.93)	0.253364	0.973724
		rs2106506	764	1.54 (-1.60,4.69)	0.337285	0.973724
		rs212669	753	-8.12 (-14.34,-1.90)	0.010729	0.973724
		rs2160543	704	0.37 (-2.95,3.69)	0.82602	0.984778
		rs2188320	761	1.09 (-1.53,3.71)	0.414344	0.973724
		rs2188495	718	-0.88 (-3.82,2.07)	0.560501	0.973724
		rs2189741	757	0.07 (-2.93,3.07)	0.96353	0.991233
		rs2214090	755	5.20 (-0.81,11.21)	0.0900868	0.973724
		rs2214850	745	1.16 (-2.30,4.62)	0.511363	0.973724
		rs2285430	713	-0.82 (-3.38,1.73)	0.528082	0.973724
		rs2285437	758	-1.13 (-5.41,3.15)	0.604315	0.973724
		rs2301949	747	-1.97 (-4.91,0.97)	0.190071	0.973724
		rs2519890	759	-3.50 (-7.02,0.01)	0.0513534	0.973724
		rs2520360	735	-0.41 (-3.90,3.09)	0.819588	0.981738
		rs2520361	724	-1.33 (-4.37,1.70)	0.389841	0.973724
		rs2520362	751	-0.67 (-3.13,1.80)	0.596095	0.973724
		rs2520458	753	0.53 (-2.05,3.11)	0.687792	0.973724
		rs2520460	759	-2.16 (-8.50,4.17)	0.503921	0.973724
		rs2526622	734	-0.22 (-2.79,2.35)	0.867241	0.991233
		rs2526626	740	-0.32 (-3.43,2.79)	0.840239	0.985186
		rs2528406	758	0.60 (-2.74,3.94)	0.726551	0.973724
		rs2541318	762	-1.78 (-5.90,2.34)	0.396526	0.973724
		rs2588621	684	0.50 (-2.36,3.36)	0.731936	0.973724
		rs2695028	750	0.88 (-1.86,3.63)	0.52805	0.973724
		rs2695029	753	-1.82 (-4.27,0.63)	0.145164	0.973724
		rs2704282	763	-2.23 (-5.12,0.66)	0.130284	0.973724
		rs2704284	745	0.11 (-2.36,2.59)	0.928158	0.991233
		rs2704289	731	1.59 (-1.35,4.52)	0.289525	0.973724
		rs2717349	752	0.54 (-2.27,3.35)	0.707725	0.973724
		rs2717356	738	0.87 (-2.30,4.05)	0.589296	0.973724
		rs2853552	734	0.29 (-2.43,3.01)	0.834694	0.985186
		rs2965026	732	1.02 (-1.81,3.84)	0.480261	0.973724
		rs3213615	749	2.01 (-0.66,4.68)	0.140877	0.973724
		rs3757718	760	-0.82 (-3.60,1.95)	0.561126	0.973724
		rs3801983	760	-0.40 (-3.53,2.73)	0.800149	0.979468
		rs3801986	756	0.05 (-2.37,2.47)	0.968915	0.991233
		rs3807917	758	2.46 (-0.10,5.02)	0.0602993	0.973724
		rs3807918	761	0.69 (-2.75,4.14)	0.693523	0.973724
		rs3814991	725	0.36 (-4.25,4.97)	0.87715	0.991233
		rs3852253	762	1.01 (-4.27,6.28)	0.70783	0.973724
		rs3852257	721	2.26 (-0.42,4.93)	0.0984741	0.973724
		rs3864420	763	1.21 (-5.22,7.65)	0.711703	0.973724
		rs4141042	761	-0.34 (-3.95,3.28)	0.855823	0.990114
		rs4141402	763	-2.94 (-7.26,1.37)	0.181097	0.973724
		rs4379363	730	1.50 (-1.51,4.51)	0.329049	0.973724
		rs4413678	761	0.95 (-4.63,6.54)	0.738417	0.973724
		rs4721718	755	0.55 (-2.86,3.95)	0.751983	0.973724
		rs4721721	752	1.21 (-2.65,5.08)	0.53811	0.973724
		rs4721726	756	-0.96 (-3.95,2.04)	0.531316	0.973724
		rs4721732	744	0.13 (-2.85,3.11)	0.930753	0.991233
		rs6947529	760	-0.53 (-3.12,2.05)	0.686692	0.973724
		rs6950376	750	1.91 (-2.48,6.29)	0.393762	0.973724
		rs6959501	753	0.33 (-3.57,4.22)	0.868502	0.991233
		rs6961943	739	0.06 (-3.55,3.68)	0.972944	0.991233
		rs6963568	729	0.71 (-2.30,3.72)	0.644394	0.973724
		rs6963748	751	0.96 (-1.90,3.82)	0.509368	0.973724
		rs6967021	714	0.38 (-2.14,2.91)	0.767214	0.973724
		rs6972422	724	0.39 (-2.53,3.30)	0.794453	0.979468
		rs6973029	763	1.83 (-0.81,4.47)	0.174184	0.973724
		rs6974011	761	0.46 (-2.08,3.01)	0.72092	0.973724
		rs6974299	761	-0.23 (-2.98,2.51)	0.86836	0.991233
		rs6976460	751	-0.79 (-3.34,1.75)	0.540008	0.973724
		rs6979890	762	0.64 (-2.44,3.72)	0.683593	0.973724
		rs706087	757	-0.86 (-3.99,2.26)	0.589124	0.973724
		rs726116	725	0.03 (-2.71,2.78)	0.980188	0.991954
		rs726805	754	-0.03 (-2.62,2.56)	0.980874	0.991954
		rs756853	755	1.85 (-0.62,4.31)	0.142503	0.973724
		rs7789752	759	-0.18 (-3.43,3.08)	0.915789	0.991233
		rs7796078	749	1.23 (-1.45,3.90)	0.369425	0.973724
		rs7798197	761	-2.26 (-5.40,0.88)	0.158143	0.973724
		rs7798646	759	-0.66 (-5.69,4.37)	0.797088	0.979468
		rs7807970	739	-1.45 (-3.98,1.08)	0.261587	0.973724
		rs7808451	754	0.73 (-1.77,3.24)	0.566399	0.973724
		rs7808698	748	-1.29 (-5.74,3.16)	0.570477	0.973724
		rs801510	756	-0.70 (-3.30,1.89)	0.595054	0.973724
		rs801524	748	0.61 (-2.66,3.88)	0.714065	0.973724
		rs801539	759	-0.79 (-4.89,3.31)	0.705315	0.973724
		rs801541	728	-0.82 (-3.42,1.78)	0.537643	0.973724
		rs801763	755	-0.77 (-4.13,2.60)	0.655564	0.973724
		rs957958	759	1.08 (-1.50,3.66)	0.413149	0.973724
		rs968841	754	-3.65 (-7.77,0.48)	0.083451	0.973724
		rs993082	737	2.06 (-1.31,5.42)	0.231492	0.973724
	LRP2	rs1003456	755	2.92 (-0.23,6.07)	0.0698095	0.973724
		rs10169232	759	1.67 (-1.13,4.46)	0.242313	0.973724
		rs10199676	761	-0.55 (-4.35,3.25)	0.776455	0.973724
		rs10204688	724	2.62 (-0.32,5.57)	0.0810859	0.973724
		rs10490129	741	-1.28 (-4.21,1.65)	0.390871	0.973724
		rs10490131	763	-0.59 (-3.82,2.65)	0.723211	0.973724
		rs11689553	753	-0.17 (-3.24,2.90)	0.914042	0.991233
		rs11887007	763	0.68 (-1.85,3.22)	0.597833	0.973724
		rs11889511	758	0.07 (-3.05,3.18)	0.966664	0.991233
		rs12614394	749	1.35 (-1.41,4.11)	0.339265	0.973724
		rs12988804	761	1.77 (-1.10,4.63)	0.227809	0.973724
		rs13002827	762	-0.20 (-3.35,2.95)	0.901749	0.991233
		rs13389381	756	0.57 (-3.87,5.00)	0.802636	0.979468
		rs13397109	760	-0.81 (-6.32,4.70)	0.772519	0.973724
		rs16856558	761	-4.35 (-16.21,7.52)	0.472825	0.973724
		rs16856748	760	-1.56 (-5.35,2.24)	0.421833	0.973724
		rs16856802	761	0.18 (-5.85,6.21)	0.952711	0.991233
		rs2024481	764	0.83 (-1.68,3.34)	0.517381	0.973724
		rs2052297	739	-0.48 (-2.96,2.01)	0.707176	0.973724
		rs2075252	752	1.34 (-1.63,4.31)	0.377338	0.973724
		rs2111187	758	1.32 (-1.41,4.05)	0.343132	0.973724
		rs2161039	753	-0.15 (-2.70,2.39)	0.906367	0.991233
		rs2228171	764	1.33 (-1.52,4.17)	0.361676	0.973724
		rs2229266	758	-0.11 (-2.92,2.70)	0.940311	0.991233
		rs2229267	752	-0.44 (-3.24,2.37)	0.759272	0.973724
		rs2239596	752	-1.15 (-3.81,1.51)	0.398143	0.973724
		rs2239602	764	2.91 (-1.17,6.98)	0.162102	0.973724
		rs2268365	743	-0.04 (-3.70,3.61)	0.980887	0.991954
		rs2268372	762	-0.18 (-3.24,2.88)	0.907673	0.991233
		rs2268373	760	1.41 (-1.47,4.29)	0.338122	0.973724
		rs2268379	739	1.43 (-1.51,4.37)	0.340486	0.973724
		rs2302694	764	1.49 (-2.62,5.60)	0.477049	0.973724
		rs2389557	736	0.91 (-1.66,3.48)	0.487956	0.973724
		rs2544380	760	-1.98 (-4.66,0.70)	0.148595	0.973724
		rs2673170	747	-4.43 (-7.27,-1.58)	0.00237261	0.948609
		rs2892802	763	1.16 (-2.38,4.70)	0.519827	0.973724
		rs35853478	760	6.33 (0.22,12.45)	0.0427441	0.973724
		rs3755166	732	2.07 (-0.54,4.68)	0.121016	0.973724
		rs3770613	720	-0.23 (-2.75,2.28)	0.854845	0.990114
		rs3821127	707	-0.29 (-3.00,2.42)	0.834431	0.985186
		rs3845732	740	-0.34 (-3.43,2.76)	0.831366	0.985186
		rs3914468	754	-0.58 (-3.33,2.17)	0.680416	0.973724
		rs6713072	746	0.10 (-2.47,2.67)	0.940197	0.991233
		rs6718884	754	5.58 (0.33,10.83)	0.0376308	0.973724
		rs6730118	740	0.94 (-2.14,4.01)	0.551247	0.973724
		rs700552	760	1.29 (-1.30,3.87)	0.329288	0.973724
		rs7568568	764	-0.68 (-4.94,3.57)	0.752657	0.973724
		rs7592152	763	-1.69 (-4.25,0.87)	0.197289	0.973724
		rs7600336	747	-0.55 (-3.07,1.97)	0.666779	0.973724
		rs830958	748	0.44 (-3.66,4.54)	0.833401	0.985186
		rs830964	759	0.33 (-2.44,3.10)	0.813971	0.979468
		rs830965	757	-1.67 (-4.45,1.12)	0.240896	0.973724
		rs830966	753	1.87 (-0.58,4.32)	0.134642	0.973724
		rs830993	760	1.43 (-3.30,6.16)	0.553265	0.973724
		rs830995	707	-0.23 (-3.17,2.71)	0.877877	0.991233
		rs830998	757	-0.80 (-4.02,2.42)	0.628315	0.973724
		rs831004	756	0.65 (-1.98,3.28)	0.62717	0.973724
		rs831005	748	0.61 (-2.28,3.50)	0.680536	0.973724
		rs831008	749	-1.14 (-4.64,2.35)	0.521593	0.973724
		rs831011	746	0.62 (-2.45,3.70)	0.692469	0.973724
		rs831012	748	0.67 (-2.02,3.37)	0.624994	0.973724
		rs831017	731	0.44 (-2.24,3.12)	0.749323	0.973724
		rs831022	692	0.57 (-2.26,3.39)	0.695309	0.973724
		rs831041	758	-0.45 (-2.88,1.99)	0.718947	0.973724
		rs831044	758	-0.86 (-3.40,1.69)	0.509511	0.973724
		rs853988	747	-1.17 (-3.68,1.33)	0.358951	0.973724
		rs9789747	759	0.24 (-2.94,3.42)	0.883387	0.991233
	MED1	rs11655550	762	0.03 (-3.14,3.19)	0.986027	0.991954
		rs4611492	747	-2.65 (-7.24,1.93)	0.257436	0.973724
		rs4795369	762	-0.81 (-3.63,2.01)	0.572991	0.973724
		rs8076997	764	2.66 (-3.16,8.48)	0.370097	0.973724
		rs9646419	754	1.10 (-2.32,4.53)	0.527727	0.973724
	NCOA1	rs11125744	762	-2.53 (-6.53,1.47)	0.21582	0.973724
		rs11892043	758	-1.73 (-4.51,1.05)	0.222311	0.973724
		rs12105106	751	-0.16 (-4.67,4.35)	0.945445	0.991233
		rs12468225	710	-1.02 (-4.48,2.45)	0.565557	0.973724
		rs12474894	763	2.07 (-1.07,5.20)	0.196601	0.973724
		rs12612839	762	-2.99 (-8.26,2.27)	0.265724	0.973724
		rs12713362	711	-2.61 (-5.42,0.20)	0.0694581	0.973724
		rs13004818	736	-2.55 (-5.05,-0.06)	0.0451525	0.973724
		rs17046434	762	2.50 (-3.24,8.23)	0.393807	0.973724
		rs17046438	764	1.08 (-3.43,5.60)	0.637845	0.973724
		rs17046513	756	2.08 (-3.94,8.11)	0.498248	0.973724
		rs17736503	763	1.50 (-4.01,7.01)	0.594689	0.973724
		rs3731628	756	-0.99 (-5.99,4.01)	0.697006	0.973724
		rs4665716	762	-1.09 (-5.92,3.75)	0.659649	0.973724
		rs6724282	745	-3.04 (-8.68,2.60)	0.290818	0.973724
		rs744078	739	-2.01 (-5.11,1.09)	0.205238	0.973724
		rs7582565	762	-3.00 (-9.99,4.00)	0.401563	0.973724
		rs995648	636	-2.45 (-7.40,2.49)	0.330601	0.973724
	NCOA2	rs10087049	741	-2.13 (-4.67,0.40)	0.0990762	0.973724
		rs12674927	743	1.32 (-1.51,4.15)	0.361014	0.973724
		rs1380897	748	-2.26 (-6.14,1.62)	0.253423	0.973724
		rs1460680	764	1.57 (-3.35,6.48)	0.532879	0.973724
		rs1531362	761	-1.12 (-5.66,3.41)	0.628279	0.973724
		rs16936754	755	0.20 (-4.80,5.19)	0.938667	0.991233
		rs16936837	763	0.86 (-4.86,6.58)	0.768804	0.973724
		rs17676138	757	3.81 (0.27,7.36)	0.0354612	0.973724
		rs17748400	749	-0.59 (-3.84,2.65)	0.720075	0.973724
		rs17748913	756	2.74 (-1.29,6.76)	0.183523	0.973724
		rs2228591	763	2.11 (-2.99,7.22)	0.416736	0.973724
		rs2926702	743	0.51 (-3.04,4.06)	0.778857	0.973724
		rs2926703	762	1.26 (-1.95,4.47)	0.442004	0.973724
		rs3812429	742	-2.07 (-5.70,1.56)	0.264967	0.973724
		rs4623463	741	-1.29 (-3.73,1.16)	0.302267	0.973724
		rs4738077	703	-0.79 (-3.69,2.11)	0.593054	0.973724
		rs4738078	740	0.17 (-2.99,3.32)	0.916307	0.991233
		rs4738080	747	0.04 (-4.94,5.03)	0.986253	0.991954
		rs6472520	754	-0.75 (-3.58,2.08)	0.604424	0.973724
	NCOA3	rs13043637	761	1.40 (-1.11,3.92)	0.275142	0.973724
		rs1537306	763	-0.33 (-4.67,4.01)	0.882294	0.991233
		rs2076546	764	0.40 (-3.96,4.75)	0.858384	0.991233
		rs2143491	740	2.23 (-0.39,4.85)	0.0959575	0.973724
		rs2230782	725	-0.84 (-5.39,3.72)	0.719414	0.973724
		rs2425941	760	1.36 (-1.12,3.84)	0.283655	0.973724
		rs3092608	762	-0.98 (-3.54,1.59)	0.456088	0.973724
		rs427967	751	-0.40 (-3.73,2.92)	0.812578	0.979468
		rs6066409	763	-0.78 (-3.67,2.10)	0.59424	0.973724
		rs6125042	731	-1.57 (-5.09,1.95)	0.383225	0.973724
		rs8114934	759	-0.52 (-4.79,3.75)	0.811896	0.979468
	NCOA7	rs10223441	764	-0.50 (-3.10,2.09)	0.703274	0.973724
		rs10782230	658	-0.91 (-3.55,1.73)	0.497803	0.973724
		rs11757529	758	-7.25 (-19.40,4.90)	0.242388	0.973724
		rs11965647	764	-2.58 (-7.16,2.00)	0.269485	0.973724
		rs11967627	749	-1.93 (-5.78,1.92)	0.325704	0.973724
		rs12201564	764	3.18 (-2.39,8.74)	0.263403	0.973724
		rs12206695	733	-0.53 (-2.96,1.90)	0.671624	0.973724
		rs1268087	749	3.16 (-0.98,7.30)	0.134687	0.973724
		rs13205456	728	(-,-)	NA	NA
		rs1407592	745	2.99 (-3.94,9.91)	0.397816	0.973724
		rs17053695	764	18.49 (-15.74,52.73)	0.29011	0.973724
		rs17292488	756	-1.05 (-3.55,1.46)	0.412379	0.973724
		rs1739384	727	-1.58 (-4.16,0.99)	0.228911	0.973724
		rs17708107	760	3.03 (-0.99,7.05)	0.139458	0.973724
		rs17745584	755	-1.39 (-5.29,2.50)	0.483686	0.973724
		rs4897161	750	-0.91 (-3.36,1.54)	0.465468	0.973724
		rs490361	756	-0.57 (-3.20,2.05)	0.669296	0.973724
		rs529858	759	-1.90 (-9.85,6.04)	0.638538	0.973724
		rs549438	763	2.07 (-0.48,4.62)	0.111754	0.973724
		rs579477	758	-3.57 (-6.07,-1.07)	0.00531901	0.948609
		rs614031	758	0.84 (-1.62,3.31)	0.502765	0.973724
		rs6919947	755	-1.23 (-3.71,1.25)	0.33043	0.973724
		rs6935780	754	0.48 (-2.15,3.12)	0.719993	0.973724
		rs715880	757	-0.56 (-3.04,1.93)	0.65919	0.973724
		rs7743352	764	11.97 (-1.04,24.97)	0.0717348	0.973724
		rs9375411	762	0.48 (-1.96,2.91)	0.701485	0.973724
		rs9385388	693	-0.27 (-2.88,2.34)	0.839414	0.985186
		rs9401850	749	-0.62 (-3.18,1.93)	0.633433	0.973724
		rs9401851	746	0.40 (-2.16,2.95)	0.759869	0.973724
		rs9491511	752	-3.01 (-22.64,16.62)	0.763757	0.973724
		rs9491534	743	0.72 (-2.96,4.41)	0.700138	0.973724
	NCOR1	rs1079533	760	-1.09 (-3.56,1.38)	0.385952	0.973724
		rs11657857	758	0.70 (-3.00,4.39)	0.711986	0.973724
		rs12942295	760	-1.39 (-3.85,1.07)	0.267561	0.973724
		rs16959544	764	3.32 (-4.57,11.20)	0.409915	0.973724
		rs178797	750	-1.21 (-3.68,1.25)	0.33487	0.973724
		rs178831	758	-1.67 (-4.18,0.83)	0.190726	0.973724
		rs2285580	753	-1.63 (-4.14,0.88)	0.202968	0.973724
	NCOR2	rs10773085	763	3.95 (0.84,7.06)	0.0130786	0.973724
		rs10846661	736	1.29 (-4.24,6.82)	0.647875	0.973724
		rs10846670	686	1.18 (-1.62,3.97)	0.409272	0.973724
		rs10846681	756	-2.19 (-5.47,1.08)	0.189867	0.973724
		rs11057590	758	-0.17 (-5.57,5.23)	0.951512	0.991233
		rs11057637	762	4.81 (0.62,9.00)	0.0246247	0.973724
		rs11057642	763	0.37 (-2.64,3.38)	0.807777	0.979468
		rs11057665	749	-0.09 (-2.62,2.45)	0.945437	0.991233
		rs1147289	761	-0.49 (-4.24,3.25)	0.797054	0.979468
		rs11608551	764	-2.29 (-8.13,3.56)	0.443475	0.973724
		rs11831370	753	-1.08 (-3.62,1.47)	0.408228	0.973724
		rs12321007	661	-0.41 (-3.11,2.30)	0.768175	0.973724
		rs12367963	762	-1.57 (-6.26,3.12)	0.511728	0.973724
		rs12370545	763	-0.62 (-3.63,2.40)	0.688058	0.973724
		rs1243000	736	-0.77 (-3.44,1.91)	0.573791	0.973724
		rs1243733	763	0.93 (-3.47,5.33)	0.678297	0.973724
		rs1244058	762	-0.27 (-4.02,3.49)	0.889769	0.991233
		rs1244061	759	-1.09 (-3.61,1.44)	0.40017	0.973724
		rs1244063	764	0.21 (-3.24,3.66)	0.905118	0.991233
		rs1244067	763	4.81 (-0.10,9.73)	0.0550989	0.973724
		rs1244092	763	3.19 (-1.54,7.92)	0.187177	0.973724
		rs1244096	761	2.19 (-2.13,6.50)	0.320747	0.973724
		rs12578256	748	-2.43 (-5.67,0.81)	0.142485	0.973724
		rs12582168	742	0.99 (-2.06,4.05)	0.524405	0.973724
		rs1263991	740	0.58 (-2.55,3.71)	0.716568	0.973724
		rs1268891	763	2.23 (-0.59,5.05)	0.12098	0.973724
		rs12708369	716	1.38 (-1.36,4.11)	0.324001	0.973724
		rs12821657	747	-2.75 (-5.94,0.45)	0.0923602	0.973724
		rs1702322	763	1.94 (-1.01,4.89)	0.197705	0.973724
		rs1702324	760	0.25 (-3.65,4.16)	0.89865	0.991233
		rs1702339	741	1.75 (-1.80,5.31)	0.334595	0.973724
		rs1794942	763	2.54 (-1.34,6.42)	0.200586	0.973724
		rs1794973	759	-1.67 (-4.17,0.83)	0.191984	0.973724
		rs2048108	756	-1.82 (-4.32,0.68)	0.154456	0.973724
		rs2063114	744	1.76 (-1.88,5.40)	0.342537	0.973724
		rs2272368	758	-1.53 (-5.30,2.24)	0.426259	0.973724
		rs2293515	758	-0.41 (-3.30,2.48)	0.78183	0.973724
		rs2342920	759	-0.15 (-2.86,2.56)	0.911672	0.991233
		rs2342922	757	-0.24 (-2.76,2.27)	0.848718	0.990114
		rs2342924	760	-1.68 (-4.34,0.99)	0.217556	0.973724
		rs3759108	761	-1.27 (-5.50,2.95)	0.554678	0.973724
		rs3782274	764	1.29 (-2.59,5.17)	0.516199	0.973724
		rs4765147	736	2.11 (-0.48,4.69)	0.110652	0.973724
		rs4765151	761	2.03 (-0.88,4.94)	0.172171	0.973724
		rs4765540	759	-2.77 (-5.75,0.21)	0.0685517	0.973724
		rs4765544	762	-1.95 (-4.44,0.54)	0.125165	0.973724
		rs701032	762	0.41 (-2.47,3.29)	0.781307	0.973724
		rs701034	759	0.65 (-1.93,3.24)	0.619703	0.973724
		rs701038	704	0.08 (-2.99,3.16)	0.957867	0.991233
		rs701039	713	1.94 (-1.41,5.30)	0.25621	0.973724
		rs701043	755	-0.93 (-4.03,2.17)	0.555599	0.973724
		rs7304356	762	-1.91 (-5.40,1.58)	0.284278	0.973724
		rs747443	760	1.67 (-1.07,4.42)	0.231926	0.973724
		rs7963151	761	4.35 (0.50,8.21)	0.0271532	0.973724
		rs7976774	751	0.56 (-2.02,3.13)	0.672187	0.973724
		rs7980125	761	1.33 (-1.43,4.09)	0.3442	0.973724
		rs837935	758	0.34 (-2.32,3.01)	0.801315	0.979468
		rs837948	750	-0.10 (-2.75,2.54)	0.938624	0.991233
		rs864492	753	0.63 (-2.02,3.28)	0.642491	0.973724
		rs906300	683	1.33 (-1.88,4.54)	0.416675	0.973724
		rs906302	761	-0.21 (-5.77,5.35)	0.941708	0.991233
		rs906304	761	-1.56 (-5.29,2.18)	0.413914	0.973724
	PCAF/KAT2B	rs10510499	758	1.20 (-3.58,5.97)	0.623692	0.973724
		rs11128934	747	-1.03 (-3.93,1.87)	0.48624	0.973724
		rs11715447	763	0.26 (-3.44,3.95)	0.89205	0.991233
		rs11923928	763	-1.00 (-4.07,2.06)	0.520393	0.973724
		rs12636078	761	-0.09 (-2.77,2.58)	0.945877	0.991233
		rs1610186	741	0.04 (-2.65,2.73)	0.975282	0.991233
		rs17626938	758	3.99 (-0.06,8.04)	0.0536291	0.973724
		rs17796904	738	0.43 (-3.68,4.54)	0.837587	0.985186
		rs17797581	763	-2.00 (-5.43,1.43)	0.254082	0.973724
		rs1915919	762	-0.84 (-3.29,1.62)	0.505552	0.973724
		rs2365794	753	-0.15 (-2.67,2.37)	0.907386	0.991233
		rs2623074	763	0.05 (-3.89,3.99)	0.979277	0.991954
		rs2686317	758	0.12 (-2.71,2.96)	0.93134	0.991233
		rs2929401	761	-1.33 (-3.92,1.26)	0.315454	0.973724
		rs2929402	762	1.26 (-1.40,3.92)	0.352858	0.973724
		rs2929404	758	1.73 (-1.48,4.94)	0.291591	0.973724
		rs2948083	758	-2.34 (-6.63,1.96)	0.28623	0.973724
		rs2948097	762	0.68 (-2.19,3.56)	0.640837	0.973724
		rs3021408	761	-0.95 (-3.48,1.58)	0.461449	0.973724
		rs3804562	737	-2.52 (-6.38,1.34)	0.200836	0.973724
		rs3804563	755	-2.01 (-4.73,0.72)	0.150111	0.973724
		rs3804570	749	-1.48 (-4.52,1.56)	0.339624	0.973724
		rs4020098	761	-1.56 (-4.16,1.04)	0.240547	0.973724
		rs6550373	749	-1.12 (-3.80,1.56)	0.414262	0.973724
		rs6765791	763	-1.33 (-3.84,1.18)	0.299475	0.973724
		rs6806287	710	-0.72 (-3.74,2.30)	0.639468	0.973724
		rs7617840	761	1.23 (-1.28,3.73)	0.337102	0.973724
		rs7628915	712	0.14 (-2.57,2.85)	0.921554	0.991233
		rs977162	761	-1.27 (-4.21,1.67)	0.396847	0.973724
		rs9819739	763	2.12 (-1.08,5.32)	0.195305	0.973724
		rs9829896	763	-0.50 (-3.10,2.10)	0.704368	0.973724
	PRMT1	rs10415880	748	-0.53 (-3.22,2.17)	0.701984	0.973724
		rs1075453	759	-1.12 (-3.65,1.41)	0.386751	0.973724
		rs3745469	762	-2.76 (-6.84,1.32)	0.185485	0.973724
		rs975484	752	-1.31 (-4.15,1.53)	0.367282	0.973724
	PTH	rs10500784	756	-0.50 (-3.13,2.13)	0.710737	0.973724
		rs1459015	758	2.17 (-0.86,5.20)	0.161435	0.973724
		rs192802	717	0.22 (-2.51,2.95)	0.874622	0.991233
		rs6254	753	-0.58 (-3.24,2.07)	0.667694	0.973724
		rs6256	762	-0.97 (-4.36,2.42)	0.574727	0.973724
		rs9630182	735	0.75 (-1.78,3.28)	0.559732	0.973724
	RXRA	rs1007971	715	2.40 (-0.53,5.33)	0.108919	0.973724
		rs1045570	759	0.92 (-2.53,4.37)	0.600825	0.973724
		rs10776909	760	1.46 (-1.46,4.37)	0.328064	0.973724
		rs10881582	678	2.00 (-1.23,5.23)	0.225367	0.973724
		rs10881583	760	1.39 (-1.59,4.36)	0.361721	0.973724
		rs11103482	744	0.08 (-4.09,4.24)	0.9717	0.991233
		rs11185659	760	-0.52 (-3.54,2.49)	0.733125	0.973724
		rs12339187	754	-1.18 (-4.46,2.10)	0.482622	0.973724
		rs1805348	759	0.19 (-10.80,11.19)	0.972531	0.991233
		rs1887309	758	0.88 (-1.76,3.51)	0.514825	0.973724
		rs3118523	758	3.41 (0.37,6.44)	0.0279969	0.973724
		rs3118526	748	3.30 (-0.44,7.05)	0.0842598	0.973724
		rs3118536	745	0.77 (-2.54,4.08)	0.648616	0.973724
		rs3118571	742	0.44 (-2.07,2.96)	0.730433	0.973724
		rs3132288	746	0.29 (-2.23,2.82)	0.819029	0.981738
		rs3132294	764	0.68 (-2.17,3.52)	0.641934	0.973724
		rs34312136	764	-1.43 (-4.07,1.20)	0.285576	0.973724
		rs35079168	761	0.99 (-1.55,3.54)	0.445364	0.973724
		rs4240705	708	0.03 (-2.59,2.65)	0.982426	0.991954
		rs4842196	762	1.95 (-0.78,4.69)	0.162257	0.973724
		rs4917348	741	-0.85 (-4.14,2.44)	0.612445	0.973724
		rs6537944	754	-1.91 (-6.35,2.52)	0.398263	0.973724
		rs7039190	761	0.78 (-5.65,7.20)	0.812949	0.979468
		rs749759	759	0.63 (-2.24,3.50)	0.666557	0.973724
		rs7861779	748	-0.09 (-4.13,3.95)	0.966001	0.991233
		rs7864987	762	0.73 (-2.12,3.58)	0.615134	0.973724
		rs875444	728	0.62 (-1.91,3.16)	0.629639	0.973724
		rs881658	727	-0.48 (-3.31,2.35)	0.738812	0.973724
		rs914853	724	-0.01 (-2.86,2.85)	0.997176	0.998343
		rs9409929	717	-0.89 (-3.52,1.74)	0.506084	0.973724
	RXRB	rs1050673	743	-2.80 (-5.45,-0.15)	0.0389308	0.973724
		rs2076310	759	-0.28 (-3.24,2.69)	0.854676	0.990114
		rs2269346	716	0.72 (-4.38,5.82)	0.782337	0.973724
		rs2744537	761	-2.57 (-5.19,0.06)	0.0560974	0.973724
		rs439205	739	-0.47 (-3.50,2.57)	0.762405	0.973724
		rs6531	735	-2.55 (-5.25,0.14)	0.0638902	0.973724
		rs9277935	760	-1.38 (-4.51,1.76)	0.389368	0.973724
	RXRG	rs100537	760	0.82 (-1.61,3.25)	0.509741	0.973724
		rs10489745	753	0.01 (-4.70,4.72)	0.997497	0.998343
		rs10800098	675	3.54 (-3.77,10.86)	0.342863	0.973724
		rs10918172	763	-1.11 (-4.24,2.03)	0.489511	0.973724
		rs1467664	746	3.30 (-0.27,6.87)	0.0701569	0.973724
		rs157864	759	1.06 (-2.33,4.46)	0.539472	0.973724
		rs157869	737	0.21 (-2.33,2.74)	0.873424	0.991233
		rs166899	760	0.69 (-2.68,4.05)	0.689433	0.973724
		rs17429123	756	-2.29 (-5.38,0.80)	0.1463	0.973724
		rs1952179	763	0.63 (-4.30,5.57)	0.801248	0.979468
		rs2194899	761	0.03 (-2.49,2.55)	0.983159	0.991954
		rs283694	756	1.11 (-1.53,3.75)	0.408734	0.973724
		rs283695	758	1.96 (-0.49,4.41)	0.117232	0.973724
		rs285480	762	-0.67 (-3.67,2.34)	0.664018	0.973724
		rs285482	750	-0.30 (-2.98,2.38)	0.826308	0.984778
		rs3753898	761	0.13 (-2.99,3.24)	0.936106	0.991233
		rs3767333	761	-1.09 (-3.95,1.77)	0.45507	0.973724
		rs3767339	761	0.94 (-1.65,3.53)	0.476687	0.973724
		rs3767344	749	0.86 (-1.61,3.34)	0.49478	0.973724
		rs41424948	764	-0.09 (-2.52,2.34)	0.941285	0.991233
		rs466639	760	-1.64 (-5.38,2.10)	0.389714	0.973724
		rs6669441	763	0.44 (-2.56,3.44)	0.774989	0.973724
		rs746332	761	2.17 (-1.54,5.89)	0.251715	0.973724
		rs752739	738	0.29 (-2.69,3.27)	0.850017	0.990114
	SMARCA2	rs2296212	756	-4.37 (-8.46,-0.28)	0.0365057	0.973724
	SMARCA4	rs12232780	762	0.55 (-2.10,3.21)	0.682954	0.973724
		rs12610693	761	0.69 (-1.93,3.31)	0.605704	0.973724
		rs12983316	737	0.84 (-2.88,4.56)	0.657296	0.973724
		rs13345127	761	0.54 (-3.22,4.30)	0.779766	0.973724
		rs17001095	761	-0.08 (-2.73,2.57)	0.953815	0.991233
		rs2072382	757	1.82 (-4.30,7.94)	0.559494	0.973724
		rs2163800	723	0.05 (-2.64,2.73)	0.973382	0.991233
		rs28997582	753	-0.22 (-5.49,5.05)	0.934454	0.991233
		rs3786721	752	-0.77 (-3.31,1.77)	0.552537	0.973724
		rs3786724	764	-1.28 (-5.86,3.29)	0.582562	0.973724
		rs6511718	737	-0.57 (-3.37,2.22)	0.687169	0.973724
		rs7275	760	-0.53 (-3.28,2.23)	0.707697	0.973724
	SMARCC1	rs11714840	763	1.23 (-1.40,3.87)	0.360009	0.973724
		rs2291903	755	4.84 (-0.35,10.04)	0.0682012	0.973724
		rs3755637	733	-0.10 (-2.79,2.59)	0.944187	0.991233
		rs4858843	755	-1.77 (-4.48,0.94)	0.200344	0.973724
	SMARCD1	rs3782323	763	-0.37 (-3.32,2.58)	0.806133	0.979468
		rs706794	762	-0.93 (-3.53,1.67)	0.482265	0.973724
		rs836177	760	3.73 (-0.50,7.96)	0.0840276	0.973724
	SMARCE1	rs11651005	759	(-,-)	NA	NA
		rs11654834	734	-0.24 (-2.78,2.30)	0.852499	0.990114
		rs11659024	763	1.10 (-1.34,3.55)	0.377218	0.973724
		rs757411	759	-1.18 (-3.71,1.34)	0.35822	0.973724
		rs757412	732	0.68 (-3.65,5.01)	0.757926	0.973724
	SNW1	rs11621593	757	3.18 (-0.26,6.63)	0.0703425	0.973724
		rs11624704	749	3.93 (0.24,7.62)	0.0370044	0.973724
		rs176978	761	-0.90 (-4.78,2.98)	0.64883	0.973724
		rs17752640	759	-0.45 (-5.60,4.70)	0.864513	0.991233
		rs17752707	764	-6.55 (-12.08,-1.01)	0.0207149	0.973724
		rs17825620	756	0.93 (-2.10,3.96)	0.5481	0.973724
		rs4346144	753	2.48 (-1.92,6.89)	0.269335	0.973724
		rs4903633	754	-1.76 (-6.33,2.80)	0.449461	0.973724
		rs7145979	744	0.51 (-2.05,3.06)	0.698715	0.973724
		rs7151685	760	-0.28 (-2.87,2.31)	0.830672	0.985186
	SUPT16H	rs10138699	753	-2.88 (-7.52,1.75)	0.223406	0.973724
		rs11624716	762	-1.80 (-6.16,2.57)	0.419754	0.973724
		rs17197086	758	0.17 (-3.68,4.02)	0.930462	0.991233
		rs3736824	761	1.42 (-1.09,3.92)	0.267584	0.973724
		rs3762158	762	-2.48 (-7.53,2.57)	0.336164	0.973724
		rs7161723	758	0.36 (-3.88,4.61)	0.867364	0.991233
		rs8021793	760	-0.98 (-9.02,7.06)	0.811086	0.979468
	TOP2B	rs1001647	756	0.17 (-2.90,3.24)	0.91251	0.991233
		rs1561033	757	0.20 (-4.74,5.14)	0.936839	0.991233
		rs17527352	741	0.75 (-2.78,4.27)	0.677818	0.973724
		rs2037860	761	-0.57 (-4.33,3.20)	0.76848	0.973724
		rs7621736	727	-0.70 (-5.44,4.05)	0.77366	0.973724
		rs7638216	727	0.41 (-2.33,3.16)	0.767746	0.973724
	TRPV5	rs1568760	751	0.17 (-4.43,4.77)	0.942701	0.991233
		rs34960591	764	2.88 (-2.48,8.24)	0.29314	0.973724
		rs4252372	763	-2.20 (-9.14,4.74)	0.534812	0.973724
		rs4252381	724	-1.95 (-7.19,3.29)	0.466098	0.973724
		rs4252424	746	-2.26 (-5.41,0.89)	0.15997	0.973724
		rs4252435	763	0.15 (-4.31,4.60)	0.948528	0.991233
		rs4252499	764	3.89 (-6.55,14.33)	0.465265	0.973724
		rs4252535	750	-4.26 (-10.50,1.97)	0.180315	0.973724
		rs8176044	761	-1.49 (-3.98,1.00)	0.241275	0.973724
	TRPV6	rs4987568	763	1.13 (-5.44,7.70)	0.736455	0.973724
		rs4987617	764	2.82 (-1.99,7.62)	0.251132	0.973724
		rs4987622	761	2.87 (-1.82,7.56)	0.230621	0.973724
		rs4987655	764	2.70 (-2.02,7.41)	0.262828	0.973724
		rs4987657	758	(-,-)	NA	NA
		rs4987665	653	2.13 (-3.03,7.30)	0.418339	0.973724
		rs4987667	763	3.02 (-1.71,7.76)	0.210703	0.973724
		rs4987668	763	2.85 (-1.96,7.65)	0.24639	0.973724
		rs4987682	754	2.61 (-2.40,7.61)	0.307476	0.973724
		rs4987691	759	3.66 (-0.74,8.06)	0.103323	0.973724
	TSC2	rs1051771	751	2.20 (-1.99,6.39)	0.304012	0.973724
		rs1748	761	2.57 (-0.56,5.70)	0.107389	0.973724
		rs1800720	762	-0.65 (-4.56,3.26)	0.744329	0.973724
		rs2073636	762	1.68 (-0.90,4.26)	0.202929	0.973724
		rs30259	638	-1.88 (-6.62,2.85)	0.435933	0.973724
		rs3087631	756	3.28 (0.22,6.34)	0.0362124	0.973724
		rs8059880	759	2.98 (-1.68,7.64)	0.210407	0.973724
		rs9928737	754	2.81 (-0.31,5.93)	0.0779285	0.973724
	VDR	rs10783219	739	-0.31 (-2.91,2.30)	0.817191	0.981738
		rs11168275	744	-1.91 (-4.83,1.02)	0.202378	0.973724
		rs11168287	760	0.10 (-2.31,2.50)	0.937406	0.991233
		rs11568820	763	-0.82 (-3.91,2.28)	0.605287	0.973724
		rs11574026	763	1.22 (-2.65,5.10)	0.536574	0.973724
		rs11574046	757	-2.63 (-7.35,2.09)	0.274515	0.973724
		rs11574077	763	4.38 (-1.32,10.07)	0.132554	0.973724
		rs11574085	761	4.24 (-1.27,9.75)	0.132288	0.973724
		rs11608702	759	-0.37 (-2.99,2.24)	0.780057	0.973724
		rs12581281	764	-0.29 (-7.82,7.24)	0.940337	0.991233
		rs12721364	762	-2.46 (-5.84,0.93)	0.155868	0.973724
		rs1544410	760	1.95 (-0.45,4.36)	0.111501	0.973724
		rs2107301	757	-3.28 (-5.98,-0.58)	0.0176574	0.973724
		rs2189480	760	-0.64 (-3.22,1.94)	0.627571	0.973724
		rs2228570	746	0.30 (-2.30,2.90)	0.821258	0.981738
		rs2238135	760	1.95 (-0.92,4.82)	0.183175	0.973724
		rs2238136	762	0.90 (-1.93,3.73)	0.534745	0.973724
		rs2239181	761	0.83 (-2.76,4.43)	0.649751	0.973724
		rs2239182	742	-3.82 (-6.15,-1.49)	0.00135679	0.948609
		rs2239186	764	-3.03 (-6.19,0.13)	0.06079	0.973724
		rs2254210	745	-0.49 (-3.01,2.03)	0.70301	0.973724
		rs2283342	743	-2.12 (-5.82,1.58)	0.262506	0.973724
		rs2853564	744	-0.26 (-2.78,2.26)	0.839422	0.985186
		rs3782905	761	1.06 (-1.53,3.65)	0.42313	0.973724
		rs3819545	752	-1.13 (-3.63,1.37)	0.375049	0.973724
		rs6580639	760	-4.24 (-10.90,2.42)	0.212862	0.973724
		rs7299460	764	-0.07 (-2.74,2.59)	0.957793	0.991233
		rs7418	753	1.80 (-1.08,4.68)	0.220289	0.973724
		rs7970314	759	-0.78 (-3.72,2.16)	0.603442	0.973724
		rs886441	751	-0.12 (-3.49,3.25)	0.944231	0.991233
	*Adjusted for age, sex, and center.

## Sheet: Supplementary Table 3B
	Supplemental Table 3B. Associations between SNPs in the genes involved in the vitamin D metabolism, mineral homeostasis/endocrine regulation of 1,25(OH)2D synthesis, and vitamin D transcriptional activity with season-adjusted 25(OH)D concentrations among cases and controls combined.
	Gene		SNP	N	25(OH)D, β (95% CI)*	P	P BH
	ACTL6A	ACTL6A;rs10513762	Rs10513762	1890	-2.10 (-5.07,0.88)	0.168248	0.939578
		ACTL6A;rs2339843	Rs2339843	1902	-4.43 (-9.30,0.44)	0.0748068	0.749828
		ACTL6A;rs9816801	Rs9816801	1877	-0.45 (-2.08,1.17)	0.586008	0.987459
	ARID1A	ARID1A;rs11247593	Rs11247593	1896	-0.53 (-2.47,1.41)	0.592117	0.987459
		ARID1A;rs11247596	Rs11247596	1900	-1.35 (-3.31,0.61)	0.178062	0.941161
		ARID1A;rs12025634	Rs12025634	1898	-0.56 (-2.86,1.74)	0.630857	0.989247
		ARID1A;rs12737946	Rs12737946	1902	1.56 (-1.33,4.44)	0.291174	0.973208
		ARID1A;rs12738345	Rs12738345	729	1.85 (-3.48,7.18)	0.497343	0.987459
		ARID1A;rs12752833	Rs12752833	1898	1.50 (-1.40,4.41)	0.310074	0.976361
		ARID1A;rs17262006	Rs17262006	1901	1.55 (-1.37,4.48)	0.298366	0.973208
		ARID1A;rs4466675	Rs4466675	1842	0.38 (-1.33,2.09)	0.664276	0.990612
		ARID1A;rs6666121	Rs6666121	1889	0.73 (-0.91,2.37)	0.382013	0.976361
	BAZ1B	BAZ1B;rs10275549	Rs10275549	1876	-0.51 (-2.54,1.53)	0.62589	0.987459
		BAZ1B;rs1178977	Rs1178977	1831	1.91 (-0.22,4.03)	0.079284	0.781243
		BAZ1B;rs1178979	Rs1178979	1902	1.41 (-0.68,3.49)	0.185745	0.941992
		BAZ1B;rs11983997	Rs11983997	1897	1.33 (-0.78,3.43)	0.216731	0.951236
		BAZ1B;rs12056034	Rs12056034	1854	2.20 (-0.40,4.79)	0.0976891	0.804225
		BAZ1B;rs17145713	Rs17145713	1899	1.32 (-0.78,3.41)	0.218262	0.951236
		BAZ1B;rs17145717	Rs17145717	1872	0.44 (-3.00,3.89)	0.800982	0.990612
		BAZ1B;rs17145721	Rs17145721	1896	-0.60 (-3.79,2.59)	0.713388	0.990612
		BAZ1B;rs17400042	Rs17400042	1849	1.64 (-3.48,6.75)	0.531153	0.987459
		BAZ1B;rs2074755	Rs2074755	1884	1.98 (-0.58,4.54)	0.129088	0.839725
		BAZ1B;rs2237279	Rs2237279	457	2.19 (-1.51,5.90)	0.246119	0.958079
		BAZ1B;rs2353082	Rs2353082	1850	-0.73 (-2.56,1.10)	0.435576	0.976361
		BAZ1B;rs4640941	Rs4640941	1883	-1.45 (-3.26,0.35)	0.115025	0.813091
		BAZ1B;rs6460043	Rs6460043	1847	1.08 (-7.08,9.25)	0.794854	0.990612
		BAZ1B;rs714052	Rs714052	1894	1.42 (-1.12,3.95)	0.273156	0.973208
	CARM1	CARM1;rs11667234	Rs11667234	1899	1.30 (-3.09,5.69)	0.56251	0.987459
		CARM1;rs1529711	Rs1529711	1238	0.88 (-1.90,3.67)	0.534619	0.987459
		CARM1;rs4804543	Rs4804543	1803	0.57 (-1.11,2.25)	0.507333	0.987459
		CARM1;rs7254708	Rs7254708	1617	-0.34 (-3.17,2.48)	0.812649	0.990612
		CARM1;rs892011	Rs892011	1892	1.27 (-0.46,3.00)	0.151749	0.898786
	CASR	CASR;rs1042636	Rs1042636	1897	0.10 (-2.25,2.46)	0.931572	0.990612
		CASR;rs10934582	Rs10934582	1884	-0.69 (-2.41,1.03)	0.430899	0.976361
		CASR;rs1354162	Rs1354162	1895	4.13 (1.63,6.62)	0.0011888	0.11254
		CASR;rs1393198	Rs1393198	1851	-1.55 (-4.17,1.08)	0.248069	0.958079
		CASR;rs1463892	Rs1463892	1763	-0.02 (-1.96,1.93)	0.987286	0.996709
		CASR;rs1501900	Rs1501900	1709	0.28 (-1.99,2.55)	0.809337	0.990612
		CASR;rs17282008	Rs17282008	1901	-1.58 (-3.39,0.23)	0.0864385	0.781243
		CASR;rs17282015	Rs17282015	1884	-1.22 (-2.87,0.43)	0.14882	0.898786
		CASR;rs17282022	Rs17282022	1882	-0.84 (-2.47,0.80)	0.314335	0.976361
		CASR;rs1847029	Rs1847029	1899	0.17 (-1.55,1.88)	0.850395	0.990612
		CASR;rs2134224	Rs2134224	1885	-0.30 (-2.63,2.02)	0.7982	0.990612
		CASR;rs2173961	Rs2173961	1881	0.26 (-1.56,2.08)	0.781414	0.990612
		CASR;rs2202127	Rs2202127	1888	-0.77 (-2.50,0.97)	0.387015	0.976361
		CASR;rs3792290	Rs3792290	1889	-0.61 (-2.99,1.78)	0.617986	0.987459
		CASR;rs3845917	Rs3845917	1901	0.09 (-1.85,2.04)	0.92429	0.990612
		CASR;rs4678029	Rs4678029	1873	-1.37 (-3.38,0.64)	0.180364	0.941161
		CASR;rs4678031	Rs4678031	1887	0.36 (-1.89,2.61)	0.754142	0.990612
		CASR;rs4678176	Rs4678176	1895	1.21 (-1.75,4.17)	0.423127	0.976361
		CASR;rs6438706	Rs6438706	1396	-0.19 (-2.72,2.35)	0.884958	0.990612
		CASR;rs6776158	Rs6776158	1867	-0.02 (-1.76,1.72)	0.982439	0.994107
		CASR;rs7635112	Rs7635112	1896	0.61 (-1.85,3.07)	0.627318	0.987459
		CASR;rs7639847	Rs7639847	1851	0.06 (-1.93,2.05)	0.951314	0.990612
		CASR;rs7644981	Rs7644981	1892	0.62 (-1.83,3.08)	0.619228	0.987459
		CASR;rs7647405	Rs7647405	1886	-0.78 (-5.09,3.53)	0.721881	0.990612
		CASR;rs7647446	Rs7647446	1852	0.07 (-2.24,2.38)	0.953773	0.990612
		CASR;rs7648041	Rs7648041	1884	-0.54 (-4.63,3.56)	0.797622	0.990612
		CASR;rs937625	Rs937625	1834	-0.16 (-3.48,3.16)	0.92378	0.990612
		CASR;rs9740	Rs9740	1892	1.14 (-0.54,2.82)	0.184411	0.941161
		CASR;rs9814524	Rs9814524	1890	0.00 (-1.96,1.97)	0.998899	0.998899
		CASR;rs9820206	Rs9820206	1825	-0.28 (-2.25,1.70)	0.781667	0.990612
		CASR;rs9826770	Rs9826770	1901	-1.01 (-4.56,2.54)	0.576828	0.987459
		CASR;rs9875101	Rs9875101	1846	0.27 (-1.55,2.10)	0.77088	0.990612
	CHAF1A	CHAF1A;rs11668886	Rs11668886	1899	0.28 (-1.55,2.11)	0.76366	0.990612
		CHAF1A;rs243341	Rs243341	1887	-1.14 (-2.88,0.60)	0.198228	0.951236
		CHAF1A;rs243352	Rs243352	1873	0.91 (-0.72,2.54)	0.274489	0.973208
		CHAF1A;rs243365	Rs243365	1767	-0.37 (-2.37,1.63)	0.719069	0.990612
		CHAF1A;rs9352	Rs9352	1848	0.96 (-0.68,2.59)	0.25277	0.958079
	CREBBP	CREBBP;rs11076787	Rs11076787	1765	-2.30 (-4.37,-0.24)	0.0291701	0.591737
		CREBBP;rs1296720	Rs1296720	1898	-1.07 (-3.07,0.93)	0.293298	0.973208
		CREBBP;rs129963	Rs129963	1858	-0.65 (-2.25,0.95)	0.428319	0.976361
		CREBBP;rs129968	Rs129968	1896	-0.57 (-2.26,1.12)	0.507182	0.987459
		CREBBP;rs130005	Rs130005	1884	-0.64 (-3.35,2.07)	0.644949	0.990612
		CREBBP;rs130021	Rs130021	1894	-1.01 (-2.72,0.70)	0.246045	0.958079
		CREBBP;rs130023	Rs130023	1886	0.97 (-3.44,5.38)	0.667566	0.990612
		CREBBP;rs130024	Rs130024	1886	3.66 (0.48,6.83)	0.0241925	0.589822
		CREBBP;rs2239316	Rs2239316	1836	-0.86 (-2.81,1.10)	0.390217	0.976361
		CREBBP;rs2239317	Rs2239317	1885	-1.00 (-3.72,1.73)	0.474424	0.98163
		CREBBP;rs2530890	Rs2530890	1704	-1.28 (-3.49,0.92)	0.254707	0.960224
		CREBBP;rs39733	Rs39733	1809	1.63 (-0.15,3.41)	0.0721007	0.749828
		CREBBP;rs8046065	Rs8046065	1884	2.10 (-0.26,4.47)	0.0811722	0.781243
		CREBBP;rs886528	Rs886528	1875	0.71 (-0.92,2.34)	0.391542	0.976361
		CREBBP;rs9392	Rs9392	1870	-1.68 (-3.59,0.22)	0.083546	0.781243
	CUBN	CUBN;rs1033765	Rs1033765	1853	0.69 (-1.82,3.20)	0.59065	0.987459
		CUBN;rs10508518	Rs10508518	1843	0.39 (-1.38,2.16)	0.665747	0.990612
		CUBN;rs10752062	Rs10752062	1811	0.08 (-1.71,1.88)	0.929289	0.990612
		CUBN;rs10795433	Rs10795433	1881	1.25 (-0.86,3.37)	0.246339	0.958079
		CUBN;rs10795440	Rs10795440	1875	0.73 (-1.33,2.80)	0.486826	0.9853
		CUBN;rs10795444	Rs10795444	923	3.71 (-2.06,9.48)	0.207754	0.951236
		CUBN;rs10795445	Rs10795445	1900	1.63 (-0.64,3.89)	0.158748	0.913873
		CUBN;rs10904824	Rs10904824	1899	-1.55 (-4.23,1.13)	0.257935	0.968109
		CUBN;rs10904833	Rs10904833	1883	0.17 (-1.44,1.78)	0.831877	0.990612
		CUBN;rs10904839	Rs10904839	1890	0.65 (-1.33,2.63)	0.517927	0.987459
		CUBN;rs10904851	Rs10904851	1861	0.11 (-1.62,1.83)	0.902937	0.990612
		CUBN;rs10904855	Rs10904855	1892	-0.25 (-2.00,1.50)	0.781887	0.990612
		CUBN;rs10904861	Rs10904861	1868	-0.66 (-2.36,1.04)	0.446593	0.976361
		CUBN;rs10904865	Rs10904865	1873	2.62 (-0.68,5.91)	0.119761	0.813091
		CUBN;rs10904881	Rs10904881	1894	0.80 (-0.81,2.42)	0.330219	0.976361
		CUBN;rs10904883	Rs10904883	1882	-1.06 (-2.80,0.68)	0.23446	0.951236
		CUBN;rs11254227	Rs11254227	1887	5.67 (1.20,10.15)	0.0130781	0.530599
		CUBN;rs11254232	Rs11254232	1898	-0.85 (-3.70,2.00)	0.559081	0.987459
		CUBN;rs11254237	Rs11254237	1898	5.36 (1.74,8.98)	0.00377192	0.214245
		CUBN;rs11254269	Rs11254269	437	5.62 (-1.21,12.45)	0.107418	0.813091
		CUBN;rs11254275	Rs11254275	1894	-0.07 (-1.75,1.61)	0.937203	0.990612
		CUBN;rs11254284	Rs11254284	1889	-0.02 (-1.69,1.64)	0.978228	0.992203
		CUBN;rs11254337	Rs11254337	1831	0.09 (-2.09,2.26)	0.935529	0.990612
		CUBN;rs11254339	Rs11254339	1870	-0.83 (-3.49,1.83)	0.542005	0.987459
		CUBN;rs11254351	Rs11254351	1897	-0.58 (-3.70,2.55)	0.718216	0.990612
		CUBN;rs11254355	Rs11254355	402	-1.69 (-5.10,1.71)	0.330747	0.976361
		CUBN;rs11254363	Rs11254363	1816	0.57 (-1.27,2.41)	0.543411	0.987459
		CUBN;rs11254375	Rs11254375	1889	0.13 (-1.62,1.88)	0.886683	0.990612
		CUBN;rs11254389	Rs11254389	1742	-1.01 (-3.39,1.38)	0.408759	0.976361
		CUBN;rs11591606	Rs11591606	1902	1.62 (-0.50,3.75)	0.13506	0.87175
		CUBN;rs11591673	Rs11591673	1896	0.26 (-1.53,2.05)	0.775599	0.990612
		CUBN;rs11591878	Rs11591878	1659	0.16 (-2.87,3.18)	0.919089	0.990612
		CUBN;rs11592014	Rs11592014	1880	0.10 (-1.56,1.77)	0.902627	0.990612
		CUBN;rs11595961	Rs11595961	1777	-1.35 (-5.45,2.74)	0.516976	0.987459
		CUBN;rs11814420	Rs11814420	1891	0.59 (-1.03,2.20)	0.476013	0.98163
		CUBN;rs12146272	Rs12146272	1888	0.36 (-1.25,1.98)	0.657587	0.990612
		CUBN;rs12243365	Rs12243365	1872	0.33 (-1.71,2.38)	0.74886	0.990612
		CUBN;rs12243895	Rs12243895	1870	0.48 (-1.30,2.25)	0.597212	0.987459
		CUBN;rs12244831	Rs12244831	1874	-0.06 (-1.92,1.80)	0.94979	0.990612
		CUBN;rs12254816	Rs12254816	1850	0.08 (-2.52,2.67)	0.953928	0.990612
		CUBN;rs12255119	Rs12255119	1892	-0.26 (-2.24,1.73)	0.799491	0.990612
		CUBN;rs12258009	Rs12258009	1900	-0.78 (-2.95,1.39)	0.481232	0.98163
		CUBN;rs12263745	Rs12263745	1865	1.25 (-0.46,2.95)	0.151086	0.898786
		CUBN;rs12414709	Rs12414709	1885	1.22 (-1.30,3.75)	0.343333	0.976361
		CUBN;rs12766939	Rs12766939	1889	0.35 (-1.45,2.15)	0.703157	0.990612
		CUBN;rs1276721	Rs1276721	1900	-1.26 (-3.27,0.75)	0.21976	0.951236
		CUBN;rs1398431	Rs1398431	1901	0.08 (-2.67,2.83)	0.954726	0.990612
		CUBN;rs1512706	Rs1512706	1828	-0.62 (-5.14,3.90)	0.788267	0.990612
		CUBN;rs1687696	Rs1687696	1724	0.55 (-1.13,2.22)	0.523106	0.987459
		CUBN;rs1707285	Rs1707285	1720	-0.90 (-2.64,0.84)	0.309473	0.976361
		CUBN;rs1707288	Rs1707288	1337	0.60 (-1.63,2.83)	0.596524	0.987459
		CUBN;rs17336476	Rs17336476	1827	0.83 (-3.45,5.12)	0.703637	0.990612
		CUBN;rs17426570	Rs17426570	1840	3.09 (-0.30,6.49)	0.0744442	0.749828
		CUBN;rs17431426	Rs17431426	1894	0.29 (-1.94,2.53)	0.798554	0.990612
		CUBN;rs17431739	Rs17431739	1897	-0.59 (-5.82,4.64)	0.824751	0.990612
		CUBN;rs1801224	Rs1801224	1876	1.05 (-0.65,2.75)	0.226178	0.951236
		CUBN;rs1801230	Rs1801230	1890	5.00 (-0.49,10.48)	0.0742252	0.749828
		CUBN;rs1801231	Rs1801231	1899	0.01 (-2.54,2.56)	0.994224	0.997107
		CUBN;rs1801239	Rs1801239	1822	-0.72 (-3.32,1.88)	0.588295	0.987459
		CUBN;rs1877479	Rs1877479	1856	-0.71 (-2.39,0.97)	0.407691	0.976361
		CUBN;rs1907368	Rs1907368	1854	-0.13 (-1.78,1.52)	0.879077	0.990612
		CUBN;rs1914172	Rs1914172	1884	-1.10 (-2.80,0.59)	0.202734	0.951236
		CUBN;rs1996317	Rs1996317	1799	0.94 (-0.74,2.62)	0.274817	0.973208
		CUBN;rs2271460	Rs2271460	1896	9.18 (-1.44,19.80)	0.0905089	0.786874
		CUBN;rs2271461	Rs2271461	1897	0.50 (-1.54,2.53)	0.631632	0.989247
		CUBN;rs2271469	Rs2271469	1555	0.44 (-1.26,2.14)	0.611139	0.987459
		CUBN;rs2273737	Rs2273737	1832	-1.05 (-3.79,1.70)	0.455661	0.976361
		CUBN;rs2281649	Rs2281649	1890	0.28 (-1.75,2.30)	0.78865	0.990612
		CUBN;rs2356215	Rs2356215	1887	0.02 (-2.55,2.59)	0.987351	0.996709
		CUBN;rs2356590	Rs2356590	1887	-0.49 (-7.29,6.31)	0.886673	0.990612
		CUBN;rs2603794	Rs2603794	1893	0.54 (-1.55,2.63)	0.612876	0.987459
		CUBN;rs2603796	Rs2603796	1887	-0.07 (-1.76,1.61)	0.933168	0.990612
		CUBN;rs2603804	Rs2603804	1894	-1.35 (-3.73,1.04)	0.268769	0.973208
		CUBN;rs2669154	Rs2669154	1806	-0.20 (-1.86,1.46)	0.815948	0.990612
		CUBN;rs2942366	Rs2942366	1865	-0.87 (-2.47,0.72)	0.282604	0.973208
		CUBN;rs3012479	Rs3012479	1887	-0.41 (-2.11,1.29)	0.637502	0.990612
		CUBN;rs3012501	Rs3012501	1829	0.17 (-1.88,2.23)	0.86926	0.990612
		CUBN;rs3740168	Rs3740168	1798	-3.34 (-10.76,4.07)	0.377271	0.976361
		CUBN;rs3847368	Rs3847368	1895	-0.60 (-2.75,1.55)	0.585145	0.987459
		CUBN;rs3934024	Rs3934024	1398	-0.76 (-6.16,4.64)	0.781833	0.990612
		CUBN;rs4082518	Rs4082518	1900	0.75 (-1.32,2.82)	0.479844	0.98163
		CUBN;rs41289305	Rs41289305	1879	-0.53 (-2.64,1.57)	0.620268	0.987459
		CUBN;rs41335345	Rs41335345	1870	-0.52 (-2.75,1.71)	0.649447	0.990612
		CUBN;rs4335444	Rs4335444	1902	0.12 (-1.50,1.74)	0.887658	0.990612
		CUBN;rs4525114	Rs4525114	1882	4.37 (1.22,7.51)	0.00661605	0.31316
		CUBN;rs45474496	Rs45474496	1873	1.94 (-2.25,6.12)	0.364231	0.976361
		CUBN;rs45551835	Rs45551835	1901	1.19 (-4.95,7.33)	0.704058	0.990612
		CUBN;rs4747284	Rs4747284	1883	2.28 (0.03,4.53)	0.0472268	0.657276
		CUBN;rs4747290	Rs4747290	1895	0.36 (-1.28,2.00)	0.668088	0.990612
		CUBN;rs4748340	Rs4748340	1898	0.33 (-1.34,1.99)	0.699303	0.990612
		CUBN;rs4748344	Rs4748344	1876	0.53 (-1.29,2.35)	0.567149	0.987459
		CUBN;rs62619939	Rs62619939	1819	2.07 (-0.55,4.68)	0.1212	0.813091
		CUBN;rs6602171	Rs6602171	1830	0.34 (-1.75,2.44)	0.748455	0.990612
		CUBN;rs6602177	Rs6602177	1881	0.90 (-0.90,2.71)	0.327865	0.976361
		CUBN;rs703060	Rs703060	1532	-0.10 (-1.90,1.70)	0.910446	0.990612
		CUBN;rs703075	Rs703075	1875	0.67 (-1.03,2.37)	0.439034	0.976361
		CUBN;rs7071215	Rs7071215	1874	0.09 (-1.58,1.76)	0.916097	0.990612
		CUBN;rs7075681	Rs7075681	1843	-0.39 (-2.51,1.72)	0.717255	0.990612
		CUBN;rs7082270	Rs7082270	1851	1.14 (-1.27,3.54)	0.353698	0.976361
		CUBN;rs7090658	Rs7090658	1883	0.52 (-1.08,2.12)	0.521297	0.987459
		CUBN;rs7094016	Rs7094016	375	4.56 (-4.41,13.53)	0.319651	0.976361
		CUBN;rs7096079	Rs7096079	1676	-1.27 (-3.00,0.47)	0.151908	0.898786
		CUBN;rs7097054	Rs7097054	1884	0.91 (-3.46,5.28)	0.681912	0.990612
		CUBN;rs7100290	Rs7100290	1877	-0.11 (-3.21,2.99)	0.945446	0.990612
		CUBN;rs780635	Rs780635	1626	0.59 (-1.33,2.50)	0.549981	0.987459
		CUBN;rs780829	Rs780829	1888	-0.38 (-2.10,1.35)	0.668362	0.990612
		CUBN;rs780837	Rs780837	1816	-0.39 (-2.22,1.45)	0.679922	0.990612
		CUBN;rs780846	Rs780846	1899	0.17 (-1.66,2.00)	0.852933	0.990612
		CUBN;rs780847	Rs780847	1838	-0.28 (-2.17,1.61)	0.773036	0.990612
		CUBN;rs7893395	Rs7893395	1825	-1.14 (-3.20,0.92)	0.277595	0.973208
		CUBN;rs7896674	Rs7896674	1900	-0.16 (-1.97,1.65)	0.86324	0.990612
		CUBN;rs7897704	Rs7897704	1899	-0.44 (-2.51,1.62)	0.673263	0.990612
		CUBN;rs7898138	Rs7898138	1870	-0.53 (-2.21,1.14)	0.532876	0.987459
		CUBN;rs7900527	Rs7900527	1875	-0.27 (-2.42,1.88)	0.804506	0.990612
		CUBN;rs7904579	Rs7904579	1878	0.63 (-1.05,2.31)	0.463035	0.976361
		CUBN;rs7906242	Rs7906242	1884	0.04 (-1.58,1.67)	0.956664	0.990612
		CUBN;rs7912716	Rs7912716	333	-11.34 (-18.79,-3.88)	0.00310379	0.203418
		CUBN;rs7914868	Rs7914868	1854	0.46 (-1.27,2.19)	0.60327	0.987459
		CUBN;rs7916688	Rs7916688	1828	-0.72 (-2.59,1.15)	0.451181	0.976361
		CUBN;rs7918815	Rs7918815	1794	0.67 (-1.11,2.46)	0.46037	0.976361
		CUBN;rs7922356	Rs7922356	1872	-0.17 (-2.71,2.38)	0.898119	0.990612
		CUBN;rs9633766	Rs9633766	1825	0.13 (-1.52,1.78)	0.876167	0.990612
		CUBN;rs9665553	Rs9665553	1477	-1.12 (-3.42,1.19)	0.342471	0.976361
		CUBN;rs994715	Rs994715	1867	1.27 (-0.96,3.50)	0.265083	0.973208
	CYP24A1	CYP24A1;rs1570669	Rs1570669	1871	-1.03 (-2.74,0.69)	0.24099	0.958079
		CYP24A1;rs2181874	Rs2181874	1901	0.57 (-1.33,2.47)	0.554694	0.987459
		CYP24A1;rs2209314	Rs2209314	1878	0.86 (-1.03,2.76)	0.371009	0.976361
		CYP24A1;rs2248359	Rs2248359	1817	-0.91 (-2.62,0.80)	0.295303	0.973208
		CYP24A1;rs2296239	Rs2296239	1898	-1.07 (-3.06,0.92)	0.291093	0.973208
		CYP24A1;rs2296241	Rs2296241	1472	0.62 (-1.18,2.42)	0.498283	0.987459
		CYP24A1;rs2426498	Rs2426498	1864	1.05 (-1.35,3.44)	0.391681	0.976361
		CYP24A1;rs2585413	Rs2585413	1761	-1.46 (-3.30,0.38)	0.119741	0.813091
		CYP24A1;rs2585415	Rs2585415	1884	-0.86 (-2.55,0.84)	0.323534	0.976361
		CYP24A1;rs2585424	Rs2585424	1809	-1.67 (-4.50,1.16)	0.247335	0.958079
		CYP24A1;rs2585428	Rs2585428	1896	0.03 (-1.60,1.65)	0.972009	0.990612
		CYP24A1;rs2762926	Rs2762926	1764	-1.12 (-2.79,0.55)	0.190516	0.943851
		CYP24A1;rs2762929	Rs2762929	1881	-0.76 (-2.42,0.91)	0.373091	0.976361
		CYP24A1;rs2762932	Rs2762932	1894	-0.41 (-2.65,1.82)	0.717233	0.990612
		CYP24A1;rs2762934	Rs2762934	1856	0.08 (-2.02,2.17)	0.943041	0.990612
		CYP24A1;rs2762941	Rs2762941	1882	-0.83 (-2.55,0.88)	0.340043	0.976361
		CYP24A1;rs3787554	Rs3787554	1894	-0.37 (-3.12,2.38)	0.791476	0.990612
		CYP24A1;rs4809956	Rs4809956	1846	-0.07 (-2.15,2.02)	0.948727	0.990612
		CYP24A1;rs4809958	Rs4809958	1901	-2.41 (-4.62,-0.20)	0.0323747	0.593567
		CYP24A1;rs4809960	Rs4809960	1892	-0.89 (-2.76,0.98)	0.350554	0.976361
		CYP24A1;rs6068810	Rs6068810	1900	1.77 (-2.17,5.71)	0.378013	0.976361
		CYP24A1;rs6068816	rs6068816	1901	-3.12 (-5.87,-0.38)	0.0258649	0.589822
		CYP24A1;rs6068821	Rs6068821	1831	0.03 (-1.62,1.67)	0.97621	0.992203
		CYP24A1;rs6097801	Rs6097801	1854	-0.95 (-3.32,1.42)	0.432959	0.976361
		CYP24A1;rs6097807	Rs6097807	1834	0.01 (-1.89,1.92)	0.990594	0.997107
		CYP24A1;rs6097809	rs6097809	941	0.77 (-5.43,6.96)	0.80868	0.990612
		CYP24A1;rs6127119	Rs6127119	313	-3.44 (-9.06,2.18)	0.230908	0.951236
		CYP24A1;rs927650	Rs927650	1779	0.51 (-1.16,2.18)	0.546555	0.987459
	CYP27B1	CYP27A1;rs11677711	Rs11677711	1892	2.46 (-1.50,6.42)	0.224081	0.951236
		CYP27A1;rs4674338	Rs4674338	1871	-0.03 (-1.68,1.62)	0.970906	0.990612
		CYP27A1;rs6436094	Rs6436094	1467	0.91 (-1.30,3.12)	0.419813	0.976361
		CYP27A1;rs647952	Rs647952	1898	-0.91 (-3.79,1.97)	0.534538	0.987459
		CYP27A1;rs7600248	Rs7600248	1883	19.69 (-15.33,54.71)	0.27065	0.973208
		CYP27A1;rs7603709	Rs7603709	1891	-0.94 (-2.56,0.67)	0.251708	0.958079
		CYP27B1;rs10877013	Rs10877013	1902	0.88 (-0.88,2.64)	0.32678	0.976361
		CYP27B1;rs4646536	Rs4646536	1861	1.19 (-0.58,2.96)	0.189225	0.943851
		CYP27B1;rs4646537	Rs4646537	1903	-3.35 (-7.52,0.81)	0.114528	0.813091
		CYP27B1;rs773643	Rs773643	1890	-1.26 (-4.14,1.62)	0.391401	0.976361
		CYP27B1;rs773649	Rs773649	1877	-0.59 (-3.16,1.99)	0.655274	0.990612
		CYP27B1;rs8176345	rs8176345	1902	25.03 (-3.61,53.67)	0.0869175	0.781243
	CYP2R1	CYP2R1;rs10766197	Rs10766197	1837	-1.36 (-3.01,0.30)	0.108566	0.813091
		CYP2R1;rs10832313	Rs10832313	1895	-2.44 (-5.30,0.43)	0.0956692	0.804225
	CYP3A4	CYP2R1;rs11023371	Rs11023371	1891	0.85 (-2.35,4.06)	0.602116	0.987459
		CYP2R1;rs11023374	Rs11023374	1879	-2.14 (-3.91,-0.37)	0.018171	0.552917
		CYP2R1;rs11819875	Rs11819875	1858	0.26 (-1.88,2.39)	0.813719	0.990612
		CYP2R1;rs12794714	Rs12794714	1837	-1.94 (-3.58,-0.31)	0.0201741	0.572944
		CYP2R1;rs1553006	Rs1553006	1895	0.64 (-0.98,2.25)	0.440111	0.976361
		CYP2R1;rs1562902	Rs1562902	1890	0.60 (-1.01,2.22)	0.463352	0.976361
		CYP2R1;rs16930609	Rs16930609	1812	3.54 (0.44,6.64)	0.0251924	0.589822
		CYP2R1;rs16930625	Rs16930625	1857	1.67 (-1.18,4.53)	0.250643	0.958079
		CYP2R1;rs1993116	Rs1993116	1857	1.94 (0.27,3.61)	0.0230645	0.589822
		CYP2R1;rs2060793	Rs2060793	1880	2.18 (0.52,3.84)	0.0101971	0.457258
		CYP3A4;rs1851426	Rs1851426	1898	-0.56 (-4.52,3.40)	0.782645	0.990612
		CYP3A4;rs2242480	Rs2242480	1888	-0.13 (-2.85,2.60)	0.926483	0.990612
		CYP3A4;rs2724112	Rs2724112	1816	0.48 (-1.17,2.13)	0.567814	0.987459
		CYP3A4;rs2740574	Rs2740574	1901	0.32 (-3.59,4.22)	0.87325	0.990612
		CYP3A4;rs34914495	Rs34914495	1528	0.13 (-2.83,3.09)	0.931956	0.990612
		CYP3A4;rs4646437	Rs4646437	1890	-0.13 (-2.71,2.45)	0.920073	0.990612
		CYP3A4;rs4986910	Rs4986910	1901	5.37 (-4.79,15.53)	0.300415	0.973208
		CYP3A4;rs6964587	Rs6964587	1868	-0.15 (-1.78,1.48)	0.859497	0.990612
	DHCR7	DHCR7;rs1044482	Rs1044482	1895	-1.78 (-3.54,-0.02)	0.0474785	0.657276
		DHCR7;rs12785878	Rs12785878	1896	-1.75 (-3.51,0.02)	0.052379	0.66758
		DHCR7;rs12800438	Rs12800438	1868	-1.76 (-3.53,0.02)	0.0524975	0.66758
		DHCR7;rs1790349	Rs1790349	1900	-2.43 (-4.46,-0.39)	0.0197534	0.572944
		DHCR7;rs1792268	Rs1792268	330	-2.20 (-11.31,6.90)	0.635763	0.990612
		DHCR7;rs1792272	Rs1792272	1888	-2.56 (-7.34,2.22)	0.293453	0.973208
		DHCR7;rs2002064	Rs2002064	1888	-1.30 (-3.20,0.59)	0.176741	0.941161
		DHCR7;rs3794060	Rs3794060	1858	-1.51 (-3.32,0.31)	0.10354	0.813091
		DHCR7;rs4944957	Rs4944957	1881	-1.90 (-3.68,-0.12)	0.0365649	0.623066
		DHCR7;rs4945008	Rs4945008	1849	-1.99 (-3.76,-0.21)	0.0282678	0.589822
		DHCR7;rs7944926	Rs7944926	1862	-1.86 (-3.64,-0.07)	0.0418727	0.65703
		DHCR7;rs909217	Rs909217	1699	-0.28 (-4.77,4.21)	0.903464	0.990612
		DHCR7;rs949177	Rs949177	1895	-2.30 (-5.90,1.29)	0.209959	0.951236
	EP300	EP300;rs1046088	Rs1046088	1395	1.03 (-3.93,6.00)	0.683021	0.990612
		EP300;rs12628695	Rs12628695	1902	-1.71 (-4.41,0.99)	0.213582	0.951236
		EP300;rs20551	Rs20551	1809	0.29 (-1.56,2.15)	0.755384	0.990612
		EP300;rs20552	Rs20552	1759	-0.89 (-2.56,0.78)	0.297815	0.973208
		EP300;rs4820429	Rs4820429	1891	-0.48 (-2.28,1.32)	0.60437	0.987459
		EP300;rs4822002	Rs4822002	1720	-1.28 (-2.98,0.41)	0.138003	0.884048
		EP300;rs5758222	Rs5758222	1887	1.33 (-0.33,2.98)	0.11577	0.813091
	GC	GC;rs1155563	Rs1155563	1832	-3.06 (-4.84,-1.27)	0.000798229	0.11254
		GC;rs12512631	Rs12512631	1861	1.11 (-0.60,2.82)	0.201997	0.951236
		GC;rs1352844	Rs1352844	1866	1.89 (-0.55,4.32)	0.129113	0.839725
		GC;rs1352846	Rs1352846	1648	-3.70 (-5.54,-1.86)	8.41126e-05	0.0244609
		GC;rs1491711	Rs1491711	1899	0.91 (-0.79,2.62)	0.294582	0.973208
		GC;rs16846876	Rs16846876	1863	-2.06 (-3.75,-0.36)	0.0175377	0.552917
		GC;rs17383291	Rs17383291	1903	-2.69 (-5.94,0.57)	0.105711	0.813091
		GC;rs17467825	Rs17467825	1759	-3.34 (-5.15,-1.53)	0.000317954	0.0541794
		GC;rs188812	Rs188812	1888	3.07 (0.54,5.60)	0.0175584	0.552917
		GC;rs2070741	Rs2070741	1900	0.75 (-2.44,3.94)	0.643496	0.990612
		GC;rs222020	Rs222020	1894	2.25 (0.05,4.45)	0.0451015	0.657276
		GC;rs222040	Rs222040	1644	-2.50 (-4.28,-0.73)	0.00582211	0.29179
		GC;rs222046	Rs222046	1880	0.41 (-3.00,3.82)	0.813169	0.990612
		GC;rs222054	Rs222054	1887	2.71 (0.94,4.48)	0.00272504	0.193478
		GC;rs2298849	Rs2298849	1879	1.89 (-0.18,3.96)	0.073743	0.749828
		GC;rs2298850	Rs2298850	1818	-3.07 (-4.90,-1.24)	0.00104598	0.11254
		GC;rs3733359	Rs3733359	1876	0.05 (-3.54,3.65)	0.977553	0.992203
		GC;rs3755967	Rs3755967	1791	-3.61 (-5.41,-1.81)	8.61298e-05	0.0244609
		GC;rs423817	Rs423817	1866	1.72 (-0.13,3.56)	0.0682682	0.749828
		GC;rs4588	Rs4588	787	-6.28 (-9.01,-3.56)	7.13156e-06	0.00607609
		GC;rs56097748	Rs56097748	1903	0.13 (-3.35,3.61)	0.94184	0.990612
		GC;rs705117	Rs705117	1897	0.19 (-2.12,2.50)	0.871917	0.990612
		GC;rs76781122	Rs76781122	1901	2.00 (-2.87,6.87)	0.421109	0.976361
		GC;rs76803094	Rs76803094	1899	-1.61 (-6.83,3.61)	0.545421	0.987459
		GC;rs842873	Rs842873	1797	1.23 (-0.46,2.92)	0.154352	0.900737
	GWAS_VD	GWAS_VD;rs10485165	Rs10485165	1897	-3.60 (-5.81,-1.38)	0.00146816	0.125087
		GWAS_VD;rs10507577	Rs10507577	1889	1.36 (-1.14,3.86)	0.287377	0.973208
	HDAC9	HDAC9;rs1005139	Rs1005139	1857	-0.25 (-2.28,1.79)	0.812454	0.990612
		HDAC9;rs10215908	Rs10215908	1898	0.36 (-2.61,3.33)	0.813655	0.990612
		HDAC9;rs10227612	Rs10227612	1892	-0.82 (-2.64,1.01)	0.381664	0.976361
		HDAC9;rs10229062	Rs10229062	1897	-0.69 (-3.50,2.11)	0.628172	0.987459
		HDAC9;rs10237366	Rs10237366	1893	0.35 (-1.31,2.00)	0.67969	0.990612
		HDAC9;rs10245874	Rs10245874	1898	0.01 (-2.07,2.09)	0.995937	0.997107
		HDAC9;rs10247238	Rs10247238	1820	0.05 (-1.71,1.82)	0.952617	0.990612
		HDAC9;rs10248565	Rs10248565	1882	0.57 (-1.83,2.96)	0.643621	0.990612
		HDAC9;rs10249700	Rs10249700	1845	-0.25 (-3.25,2.74)	0.868187	0.990612
		HDAC9;rs10250414	Rs10250414	1828	0.48 (-1.15,2.12)	0.561914	0.987459
		HDAC9;rs10258269	Rs10258269	1834	-0.04 (-2.65,2.57)	0.976747	0.992203
		HDAC9;rs10259495	Rs10259495	1866	-1.19 (-4.21,1.84)	0.442185	0.976361
		HDAC9;rs10261308	Rs10261308	1870	-1.10 (-5.45,3.24)	0.618516	0.987459
		HDAC9;rs10261942	Rs10261942	1852	0.09 (-1.69,1.87)	0.921394	0.990612
		HDAC9;rs10264011	Rs10264011	1758	0.37 (-1.58,2.32)	0.710316	0.990612
		HDAC9;rs10269422	Rs10269422	1870	0.13 (-1.60,1.87)	0.881762	0.990612
		HDAC9;rs10272295	Rs10272295	1858	1.23 (-1.06,3.53)	0.292394	0.973208
		HDAC9;rs10272709	Rs10272709	1864	0.46 (-1.92,2.84)	0.705353	0.990612
		HDAC9;rs10276613	Rs10276613	1796	0.09 (-2.11,2.29)	0.936063	0.990612
		HDAC9;rs10278449	Rs10278449	1791	-1.36 (-3.64,0.91)	0.240353	0.958079
		HDAC9;rs10282136	Rs10282136	1869	-0.39 (-2.00,1.22)	0.635415	0.990612
		HDAC9;rs1034805	Rs1034805	1870	-0.51 (-2.23,1.20)	0.556788	0.987459
		HDAC9;rs10486293	Rs10486293	1863	1.00 (-1.00,2.99)	0.326803	0.976361
		HDAC9;rs10486317	Rs10486317	1716	-2.25 (-4.01,-0.48)	0.0126752	0.530599
		HDAC9;rs10486323	Rs10486323	1869	0.30 (-2.31,2.91)	0.821147	0.990612
		HDAC9;rs1089358	Rs1089358	1187	-2.54 (-5.65,0.56)	0.108555	0.813091
		HDAC9;rs1117533	Rs1117533	1772	-0.18 (-1.93,1.57)	0.837648	0.990612
		HDAC9;rs11543651	Rs11543651	1352	-0.69 (-2.64,1.26)	0.488024	0.9853
		HDAC9;rs11762171	Rs11762171	1895	-0.47 (-3.50,2.55)	0.758354	0.990612
		HDAC9;rs11764116	Rs11764116	1794	-0.74 (-2.72,1.24)	0.462399	0.976361
		HDAC9;rs11764843	Rs11764843	1720	-0.81 (-2.50,0.89)	0.35069	0.976361
		HDAC9;rs1178114	Rs1178114	1893	0.15 (-1.64,1.94)	0.867997	0.990612
		HDAC9;rs1178118	Rs1178118	1861	-0.09 (-2.12,1.93)	0.929276	0.990612
		HDAC9;rs1178178	Rs1178178	1889	0.59 (-1.55,2.72)	0.590704	0.987459
		HDAC9;rs12056282	Rs12056282	1898	-0.11 (-4.31,4.09)	0.959756	0.990612
		HDAC9;rs12531908	Rs12531908	1296	1.00 (-1.07,3.07)	0.343918	0.976361
		HDAC9;rs12533489	Rs12533489	1773	1.37 (-0.87,3.62)	0.230779	0.951236
		HDAC9;rs12535092	Rs12535092	1896	-0.73 (-2.62,1.16)	0.450217	0.976361
		HDAC9;rs12669760	Rs12669760	1873	-0.88 (-2.83,1.06)	0.37359	0.976361
		HDAC9;rs12699985	Rs12699985	1891	0.16 (-1.65,1.96)	0.866022	0.990612
		HDAC9;rs12699991	Rs12699991	1895	0.23 (-1.42,1.89)	0.782611	0.990612
		HDAC9;rs12700003	Rs12700003	1896	-0.08 (-1.73,1.56)	0.920532	0.990612
		HDAC9;rs13234273	Rs13234273	1901	0.93 (-1.67,3.54)	0.482428	0.98163
		HDAC9;rs13241157	Rs13241157	1878	-0.09 (-1.88,1.70)	0.91986	0.990612
		HDAC9;rs13246896	Rs13246896	1822	-0.23 (-2.14,1.69)	0.816388	0.990612
		HDAC9;rs13438248	Rs13438248	1852	0.44 (-1.62,2.51)	0.673818	0.990612
		HDAC9;rs1405618	Rs1405618	1879	-0.11 (-1.86,1.65)	0.905101	0.990612
		HDAC9;rs1624397	Rs1624397	1842	-2.16 (-4.13,-0.19)	0.0316204	0.593567
		HDAC9;rs1633789	Rs1633789	1896	-3.30 (-7.24,0.65)	0.101334	0.813091
		HDAC9;rs16872155	Rs16872155	1888	0.67 (-1.01,2.36)	0.433378	0.976361
		HDAC9;rs17139546	Rs17139546	1886	-0.42 (-7.39,6.56)	0.906902	0.990612
		HDAC9;rs17140133	Rs17140133	1900	-2.48 (-7.69,2.73)	0.350973	0.976361
		HDAC9;rs17140138	Rs17140138	1899	-0.12 (-4.38,4.14)	0.954714	0.990612
		HDAC9;rs17140244	Rs17140244	1872	-1.56 (-3.39,0.27)	0.09509	0.804225
		HDAC9;rs17140251	Rs17140251	1871	1.50 (-2.14,5.15)	0.418416	0.976361
		HDAC9;rs17140345	Rs17140345	1893	1.60 (-0.52,3.72)	0.14027	0.885258
		HDAC9;rs17140423	Rs17140423	1898	0.72 (-1.06,2.49)	0.428735	0.976361
		HDAC9;rs1726595	Rs1726595	1870	-1.36 (-2.98,0.25)	0.0981683	0.804225
		HDAC9;rs1726596	Rs1726596	1847	-0.48 (-3.46,2.49)	0.750549	0.990612
		HDAC9;rs1726597	Rs1726597	1862	0.29 (-1.70,2.29)	0.772951	0.990612
		HDAC9;rs1726610	Rs1726610	1887	-0.72 (-2.38,0.94)	0.39747	0.976361
		HDAC9;rs17349342	Rs17349342	1885	0.25 (-1.38,1.88)	0.762772	0.990612
		HDAC9;rs17349832	Rs17349832	1802	-0.15 (-2.20,1.90)	0.887095	0.990612
		HDAC9;rs17350355	Rs17350355	1865	-0.16 (-1.80,1.49)	0.851386	0.990612
		HDAC9;rs17350515	Rs17350515	1672	0.49 (-1.33,2.32)	0.597489	0.987459
		HDAC9;rs17432448	Rs17432448	1851	0.03 (-1.67,1.73)	0.971972	0.990612
		HDAC9;rs17433095	Rs17433095	1870	0.20 (-2.89,3.28)	0.90119	0.990612
		HDAC9;rs17433319	Rs17433319	1879	-0.08 (-2.77,2.61)	0.95229	0.990612
		HDAC9;rs17435661	Rs17435661	1891	1.46 (-1.59,4.50)	0.348516	0.976361
		HDAC9;rs2023651	Rs2023651	442	-1.28 (-5.31,2.75)	0.533541	0.987459
		HDAC9;rs2051920	Rs2051920	1895	0.91 (-0.96,2.79)	0.338707	0.976361
		HDAC9;rs2073973	Rs2073973	1888	1.85 (0.22,3.49)	0.0267083	0.589822
		HDAC9;rs2106506	Rs2106506	1902	1.59 (-0.54,3.71)	0.143519	0.886076
		HDAC9;rs212669	Rs212669	1872	-1.85 (-5.84,2.14)	0.36446	0.976361
		HDAC9;rs2157847	Rs2157847	1561	-0.30 (-4.16,3.55)	0.877697	0.990612
		HDAC9;rs2160543	Rs2160543	1793	0.06 (-2.05,2.16)	0.958918	0.990612
		HDAC9;rs2188320	Rs2188320	1888	-0.24 (-1.95,1.48)	0.786121	0.990612
		HDAC9;rs2188495	Rs2188495	1782	0.13 (-1.79,2.06)	0.893622	0.990612
		HDAC9;rs2189741	Rs2189741	1885	0.36 (-1.60,2.33)	0.715759	0.990612
		HDAC9;rs2214090	Rs2214090	1890	2.37 (-1.34,6.09)	0.210962	0.951236
		HDAC9;rs2214850	Rs2214850	1833	1.35 (-1.04,3.73)	0.2678	0.973208
		HDAC9;rs2240419	Rs2240419	1336	-1.45 (-3.67,0.77)	0.2015	0.951236
		HDAC9;rs2285430	Rs2285430	1735	-1.23 (-2.89,0.43)	0.146638	0.892395
		HDAC9;rs2285437	Rs2285437	1894	-0.67 (-3.55,2.20)	0.645387	0.990612
		HDAC9;rs2285440	Rs2285440	889	2.10 (-3.08,7.27)	0.427243	0.976361
		HDAC9;rs2301949	Rs2301949	1766	-1.80 (-3.75,0.16)	0.0713574	0.749828
		HDAC9;rs2301950	Rs2301950	436	1.50 (-2.02,5.03)	0.403155	0.976361
		HDAC9;rs2389992	Rs2389992	1533	0.50 (-1.39,2.40)	0.602186	0.987459
		HDAC9;rs2519890	Rs2519890	1887	-2.81 (-5.09,-0.53)	0.0157718	0.552917
		HDAC9;rs2520360	Rs2520360	1840	0.88 (-1.36,3.12)	0.441987	0.976361
		HDAC9;rs2520361	Rs2520361	1786	-1.93 (-3.98,0.11)	0.0635229	0.749828
		HDAC9;rs2520362	Rs2520362	1853	-0.55 (-2.19,1.10)	0.514815	0.987459
		HDAC9;rs2520458	Rs2520458	1858	1.06 (-0.64,2.75)	0.22104	0.951236
		HDAC9;rs2520460	Rs2520460	1890	-1.45 (-5.40,2.50)	0.472441	0.98163
		HDAC9;rs2526622	Rs2526622	1773	1.16 (-0.50,2.83)	0.172035	0.939578
		HDAC9;rs2526626	Rs2526626	1816	-2.16 (-4.16,-0.15)	0.0349895	0.608389
		HDAC9;rs2528406	Rs2528406	1852	0.25 (-1.98,2.48)	0.825862	0.990612
		HDAC9;rs2541318	Rs2541318	1897	-0.01 (-2.61,2.60)	0.995729	0.997107
		HDAC9;rs2588621	Rs2588621	1628	-0.22 (-2.03,1.59)	0.809327	0.990612
		HDAC9;rs2695028	Rs2695028	1827	1.12 (-0.68,2.92)	0.222371	0.951236
		HDAC9;rs2695029	Rs2695029	1861	-1.68 (-3.29,-0.06)	0.0424139	0.65703
		HDAC9;rs2704282	Rs2704282	1898	-1.98 (-3.92,-0.04)	0.0453483	0.657276
		HDAC9;rs2704284	Rs2704284	1838	0.12 (-1.49,1.73)	0.883865	0.990612
		HDAC9;rs2704289	Rs2704289	1822	1.01 (-0.90,2.92)	0.299207	0.973208
		HDAC9;rs2717349	Rs2717349	1870	0.12 (-1.72,1.96)	0.898796	0.990612
		HDAC9;rs2717356	Rs2717356	1818	1.64 (-0.45,3.72)	0.123705	0.823413
		HDAC9;rs2853552	Rs2853552	1824	-0.32 (-2.14,1.50)	0.729031	0.990612
		HDAC9;rs2965026	Rs2965026	1825	-0.07 (-1.92,1.78)	0.943565	0.990612
		HDAC9;rs3213615	Rs3213615	1850	0.21 (-1.53,1.95)	0.814588	0.990612
		HDAC9;rs3757718	Rs3757718	1885	-0.39 (-2.21,1.42)	0.67105	0.990612
		HDAC9;rs3801983	Rs3801983	1884	-0.71 (-2.70,1.27)	0.481342	0.98163
		HDAC9;rs3801986	Rs3801986	1880	0.57 (-1.04,2.19)	0.487778	0.9853
		HDAC9;rs3807917	Rs3807917	1888	2.48 (0.82,4.13)	0.00338413	0.205948
		HDAC9;rs3807918	Rs3807918	1862	1.64 (-0.67,3.95)	0.164715	0.935194
		HDAC9;rs3814991	Rs3814991	1784	-1.40 (-4.49,1.69)	0.374651	0.976361
		HDAC9;rs3852253	Rs3852253	1893	-1.78 (-5.23,1.68)	0.313108	0.976361
		HDAC9;rs3852257	Rs3852257	1798	0.99 (-0.75,2.72)	0.266219	0.973208
		HDAC9;rs3864420	Rs3864420	1901	0.56 (-3.49,4.60)	0.786487	0.990612
		HDAC9;rs4141042	Rs4141042	1896	0.73 (-1.60,3.06)	0.541575	0.987459
		HDAC9;rs4141402	Rs4141402	1901	-2.48 (-5.29,0.34)	0.0851656	0.781243
		HDAC9;rs4379363	Rs4379363	1840	0.63 (-1.33,2.59)	0.527292	0.987459
		HDAC9;rs4413678	Rs4413678	1898	-2.43 (-6.38,1.53)	0.228923	0.951236
		HDAC9;rs4721718	Rs4721718	1868	-0.41 (-2.68,1.85)	0.720883	0.990612
		HDAC9;rs4721721	Rs4721721	1866	0.65 (-1.83,3.12)	0.608579	0.987459
		HDAC9;rs4721722	Rs4721722	1566	0.86 (-2.29,4.00)	0.593198	0.987459
		HDAC9;rs4721726	Rs4721726	1875	-1.34 (-3.25,0.57)	0.170076	0.939578
		HDAC9;rs4721732	Rs4721732	1846	0.04 (-1.96,2.03)	0.971318	0.990612
		HDAC9;rs6947529	Rs6947529	1891	-0.75 (-2.40,0.90)	0.37357	0.976361
		HDAC9;rs6950376	Rs6950376	1856	-0.92 (-3.76,1.91)	0.523125	0.987459
		HDAC9;rs6959501	Rs6959501	1888	0.58 (-1.99,3.14)	0.66058	0.990612
		HDAC9;rs6961943	Rs6961943	1828	-0.97 (-3.47,1.53)	0.448234	0.976361
		HDAC9;rs6963568	Rs6963568	1813	0.42 (-1.53,2.36)	0.675146	0.990612
		HDAC9;rs6963748	Rs6963748	1871	0.70 (-1.16,2.57)	0.45857	0.976361
		HDAC9;rs6967021	Rs6967021	1746	-0.62 (-2.29,1.05)	0.465261	0.976361
		HDAC9;rs6972422	Rs6972422	1752	-0.69 (-2.62,1.23)	0.480061	0.98163
		HDAC9;rs6973029	Rs6973029	1898	0.32 (-1.39,2.04)	0.711979	0.990612
		HDAC9;rs6974011	Rs6974011	1892	0.54 (-1.13,2.20)	0.528802	0.987459
		HDAC9;rs6974299	Rs6974299	1877	0.41 (-1.39,2.21)	0.656508	0.990612
		HDAC9;rs6976460	Rs6976460	1866	-0.63 (-2.31,1.04)	0.458692	0.976361
		HDAC9;rs6979890	Rs6979890	1898	-0.25 (-2.22,1.73)	0.807182	0.990612
		HDAC9;rs706087	Rs706087	1886	-0.84 (-2.87,1.19)	0.416308	0.976361
		HDAC9;rs726116	Rs726116	1777	-0.16 (-1.90,1.58)	0.858792	0.990612
		HDAC9;rs726805	Rs726805	1874	-0.15 (-1.80,1.50)	0.858682	0.990612
		HDAC9;rs756853	Rs756853	1875	0.62 (-1.01,2.25)	0.454488	0.976361
		HDAC9;rs7789752	Rs7789752	1892	0.74 (-1.49,2.97)	0.516461	0.987459
		HDAC9;rs7796078	Rs7796078	1872	0.15 (-1.59,1.88)	0.867955	0.990612
		HDAC9;rs7798197	Rs7798197	1888	-0.67 (-2.69,1.35)	0.515297	0.987459
		HDAC9;rs7798646	Rs7798646	1888	-0.54 (-3.60,2.51)	0.726351	0.990612
		HDAC9;rs7807970	Rs7807970	1781	-1.67 (-3.32,-0.01)	0.0482283	0.657276
		HDAC9;rs7808451	Rs7808451	1869	0.66 (-1.00,2.32)	0.43615	0.976361
		HDAC9;rs7808698	Rs7808698	1865	-0.70 (-3.70,2.29)	0.646436	0.990612
		HDAC9;rs801510	Rs801510	1886	0.20 (-1.45,1.86)	0.808662	0.990612
		HDAC9;rs801524	Rs801524	1865	0.15 (-1.96,2.27)	0.887425	0.990612
		HDAC9;rs801539	Rs801539	1895	-2.39 (-5.09,0.31)	0.083328	0.781243
		HDAC9;rs801541	Rs801541	1801	-0.68 (-2.30,0.95)	0.414437	0.976361
		HDAC9;rs801763	Rs801763	1882	0.26 (-1.94,2.46)	0.817211	0.990612
		HDAC9;rs957958	Rs957958	1883	0.74 (-0.94,2.41)	0.387124	0.976361
		HDAC9;rs968841	Rs968841	1868	-1.92 (-4.64,0.79)	0.165744	0.935194
		HDAC9;rs993082	Rs993082	1773	1.70 (-0.49,3.89)	0.128606	0.839725
	LRP2	LRP2;rs1003456	Rs1003456	1877	-0.43 (-2.49,1.63)	0.684248	0.990612
		LRP2;rs10169232	Rs10169232	1890	-0.60 (-2.33,1.13)	0.494192	0.987459
		LRP2;rs10199676	Rs10199676	1895	-0.69 (-3.16,1.78)	0.583675	0.987459
		LRP2;rs10204688	Rs10204688	1816	-0.87 (-2.68,0.95)	0.348931	0.976361
		LRP2;rs10490129	Rs10490129	1856	0.15 (-1.73,2.04)	0.874214	0.990612
		LRP2;rs10490131	Rs10490131	1877	0.98 (-1.25,3.21)	0.388561	0.976361
		LRP2;rs11689553	Rs11689553	1861	1.27 (-0.71,3.26)	0.208313	0.951236
		LRP2;rs11887007	Rs11887007	1900	0.35 (-1.30,2.00)	0.679433	0.990612
		LRP2;rs11889511	Rs11889511	1888	-0.53 (-2.58,1.51)	0.609191	0.987459
		LRP2;rs12614394	Rs12614394	1874	-0.20 (-2.00,1.61)	0.830976	0.990612
		LRP2;rs12988804	Rs12988804	1897	0.44 (-1.42,2.30)	0.645926	0.990612
		LRP2;rs13002827	Rs13002827	1898	-1.70 (-3.78,0.38)	0.110128	0.813091
		LRP2;rs13389381	Rs13389381	1875	0.58 (-2.45,3.60)	0.709231	0.990612
		LRP2;rs13397109	Rs13397109	1895	-1.74 (-5.35,1.87)	0.344291	0.976361
		LRP2;rs16856558	Rs16856558	1890	-3.80 (-10.75,3.16)	0.2848	0.973208
		LRP2;rs16856748	Rs16856748	1889	-1.29 (-3.80,1.23)	0.315673	0.976361
		LRP2;rs16856802	Rs16856802	1898	3.91 (0.02,7.81)	0.0491873	0.657276
		LRP2;rs2024481	Rs2024481	1890	-0.73 (-2.37,0.91)	0.381919	0.976361
		LRP2;rs2052297	Rs2052297	1811	-0.47 (-2.12,1.19)	0.581535	0.987459
		LRP2;rs2075252	Rs2075252	1879	-1.63 (-3.49,0.23)	0.0862313	0.781243
		LRP2;rs2111187	Rs2111187	1892	-0.52 (-2.25,1.20)	0.551523	0.987459
		LRP2;rs2161039	Rs2161039	1874	-0.28 (-1.92,1.36)	0.737773	0.990612
		LRP2;rs2228171	Rs2228171	1896	-0.33 (-2.14,1.48)	0.720486	0.990612
		LRP2;rs2229266	Rs2229266	1890	0.25 (-1.56,2.05)	0.787535	0.990612
		LRP2;rs2229267	rs2229267	1859	0.79 (-1.12,2.70)	0.416287	0.976361
		LRP2;rs2239596	Rs2239596	1866	0.35 (-1.39,2.10)	0.692041	0.990612
		LRP2;rs2239602	Rs2239602	1899	-0.59 (-3.20,2.03)	0.661093	0.990612
		LRP2;rs2268365	Rs2268365	1858	0.05 (-2.38,2.48)	0.96721	0.990612
		LRP2;rs2268372	Rs2268372	1890	0.09 (-1.92,2.09)	0.932724	0.990612
		LRP2;rs2268373	Rs2268373	1895	0.59 (-1.30,2.48)	0.540166	0.987459
		LRP2;rs2268379	Rs2268379	1847	-1.52 (-3.39,0.36)	0.113313	0.813091
		LRP2;rs2302694	Rs2302694	1902	0.70 (-2.07,3.47)	0.618316	0.987459
		LRP2;rs2389557	Rs2389557	1839	-0.56 (-2.23,1.10)	0.507529	0.987459
		LRP2;rs2544371	Rs2544371	362	0.15 (-4.15,4.45)	0.945061	0.990612
		LRP2;rs2544380	Rs2544380	1895	-1.04 (-2.80,0.73)	0.248952	0.958079
		LRP2;rs2673170	Rs2673170	1877	-1.87 (-3.72,-0.02)	0.0474996	0.657276
		LRP2;rs2892802	Rs2892802	1901	-0.21 (-2.53,2.10)	0.85624	0.990612
		LRP2;rs35853478	Rs35853478	1894	3.07 (-1.03,7.16)	0.14253	0.886076
		LRP2;rs3755166	Rs3755166	1796	-0.33 (-2.06,1.40)	0.708881	0.990612
		LRP2;rs3770613	Rs3770613	1806	0.75 (-0.89,2.38)	0.369543	0.976361
		LRP2;rs3821127	Rs3821127	1772	0.59 (-1.13,2.30)	0.502546	0.987459
		LRP2;rs3845732	Rs3845732	1810	-0.87 (-2.89,1.15)	0.398785	0.976361
		LRP2;rs3914468	Rs3914468	1867	-0.21 (-2.01,1.59)	0.816987	0.990612
		LRP2;rs6713072	Rs6713072	1838	0.69 (-0.98,2.35)	0.420079	0.976361
		LRP2;rs6718884	Rs6718884	1884	2.15 (-1.26,5.57)	0.217056	0.951236
		LRP2;rs6730118	Rs6730118	1819	-0.30 (-2.35,1.74)	0.772464	0.990612
		LRP2;rs700552	Rs700552	1895	0.95 (-0.76,2.66)	0.275766	0.973208
		LRP2;rs7568568	Rs7568568	1897	-2.21 (-5.00,0.58)	0.120807	0.813091
		LRP2;rs7592152	Rs7592152	1898	-0.56 (-2.23,1.11)	0.513039	0.987459
		LRP2;rs7600336	Rs7600336	1864	0.33 (-1.34,2.00)	0.698191	0.990612
		LRP2;rs830958	Rs830958	1849	-2.12 (-4.74,0.50)	0.112511	0.813091
		LRP2;rs830964	Rs830964	1880	0.28 (-1.54,2.11)	0.76247	0.990612
		LRP2;rs830965	Rs830965	1889	-0.85 (-2.69,1.00)	0.366669	0.976361
		LRP2;rs830966	Rs830966	1872	0.77 (-0.85,2.39)	0.351097	0.976361
		LRP2;rs830980	Rs830980	1414	0.67 (-2.69,4.04)	0.694094	0.990612
		LRP2;rs830993	Rs830993	1889	0.93 (-2.08,3.95)	0.544179	0.987459
		LRP2;rs830994	Rs830994	1246	-0.07 (-2.19,2.05)	0.950076	0.990612
		LRP2;rs830995	Rs830995	1746	-0.73 (-2.61,1.15)	0.443872	0.976361
		LRP2;rs830998	Rs830998	1861	-1.64 (-3.68,0.40)	0.115709	0.813091
		LRP2;rs831004	Rs831004	1877	-1.16 (-2.83,0.50)	0.171579	0.939578
		LRP2;rs831005	Rs831005	1846	-0.52 (-2.42,1.38)	0.589856	0.987459
		LRP2;rs831008	Rs831008	1869	-1.20 (-3.48,1.07)	0.298737	0.973208
		LRP2;rs831011	Rs831011	1868	-0.73 (-2.69,1.24)	0.469054	0.979495
		LRP2;rs831012	Rs831012	1845	-1.27 (-3.02,0.47)	0.153225	0.900327
		LRP2;rs831017	Rs831017	1820	0.50 (-1.23,2.24)	0.570431	0.987459
		LRP2;rs831022	Rs831022	1714	-0.25 (-2.12,1.61)	0.79029	0.990612
		LRP2;rs831041	Rs831041	1892	0.23 (-1.40,1.86)	0.7821	0.990612
		LRP2;rs831044	Rs831044	1891	0.07 (-1.60,1.73)	0.937911	0.990612
		LRP2;rs853988	Rs853988	1858	-0.69 (-2.33,0.96)	0.412342	0.976361
		LRP2;rs9789747	Rs9789747	1881	1.48 (-0.57,3.52)	0.156851	0.909098
	MED1	MED1;rs11655550	Rs11655550	1888	1.09 (-0.93,3.11)	0.291348	0.973208
		MED1;rs4611492	Rs4611492	1867	0.84 (-2.09,3.76)	0.575998	0.987459
		MED1;rs4795369	Rs4795369	1886	0.71 (-1.08,2.50)	0.438809	0.976361
		MED1;rs8076997	Rs8076997	1894	4.14 (0.24,8.05)	0.0377865	0.631256
		MED1;rs9646419	Rs9646419	1879	1.42 (-0.76,3.61)	0.201404	0.951236
	NCOA1	NCOA1;rs11125744	Rs11125744	1893	0.94 (-1.75,3.63)	0.493487	0.987459
		NCOA1;rs11892043	Rs11892043	1875	-1.02 (-2.86,0.83)	0.280209	0.973208
		NCOA1;rs12105106	Rs12105106	1852	-0.02 (-3.15,3.11)	0.991492	0.997107
		NCOA1;rs12468225	Rs12468225	1729	0.25 (-2.11,2.60)	0.836828	0.990612
		NCOA1;rs12474894	Rs12474894	1896	1.84 (-0.23,3.91)	0.0817142	0.781243
		NCOA1;rs12612839	Rs12612839	1894	-1.31 (-4.95,2.33)	0.480332	0.98163
		NCOA1;rs12713362	Rs12713362	1751	0.49 (-1.36,2.34)	0.605566	0.987459
		NCOA1;rs13004818	Rs13004818	1837	-0.69 (-2.33,0.95)	0.40967	0.976361
		NCOA1;rs17046434	Rs17046434	1880	0.15 (-3.42,3.73)	0.932266	0.990612
		NCOA1;rs17046438	Rs17046438	1900	-0.38 (-3.22,2.46)	0.794711	0.990612
		NCOA1;rs17046513	Rs17046513	1854	-0.79 (-4.57,3.00)	0.683729	0.990612
		NCOA1;rs17736503	Rs17736503	1899	-1.66 (-5.18,1.86)	0.354338	0.976361
		NCOA1;rs3731628	Rs3731628	1885	-0.98 (-4.37,2.41)	0.572314	0.987459
		NCOA1;rs4665716	Rs4665716	1901	-0.47 (-3.76,2.82)	0.778897	0.990612
		NCOA1;rs6724282	Rs6724282	1864	-1.06 (-4.89,2.77)	0.586667	0.987459
		NCOA1;rs744078	Rs744078	1779	-1.16 (-3.19,0.87)	0.264351	0.973208
		NCOA1;rs7582565	Rs7582565	1897	-1.45 (-6.29,3.39)	0.55704	0.987459
		NCOA1;rs995648	Rs995648	1551	0.71 (-2.44,3.86)	0.65824	0.990612
	NCOA2	NCOA2;rs10087049	Rs10087049	1768	-0.81 (-2.60,0.98)	0.37321	0.976361
		NCOA2;rs12674927	Rs12674927	1828	0.51 (-1.34,2.36)	0.589527	0.987459
		NCOA2;rs1380897	Rs1380897	1842	-0.71 (-3.38,1.96)	0.604178	0.987459
		NCOA2;rs1460680	Rs1460680	1900	0.93 (-2.35,4.20)	0.579218	0.987459
		NCOA2;rs1531362	Rs1531362	1891	-0.02 (-3.09,3.06)	0.99232	0.997107
		NCOA2;rs16936754	Rs16936754	1874	0.74 (-2.52,3.99)	0.657749	0.990612
		NCOA2;rs16936837	Rs16936837	1900	4.27 (0.41,8.13)	0.0302747	0.593567
		NCOA2;rs16936872	Rs16936872	898	-0.82 (-5.58,3.94)	0.736265	0.990612
		NCOA2;rs17676138	Rs17676138	1879	0.56 (-1.70,2.82)	0.626791	0.987459
		NCOA2;rs17748400	Rs17748400	1876	-1.27 (-3.33,0.80)	0.228981	0.951236
		NCOA2;rs17748913	Rs17748913	1866	-0.01 (-2.67,2.65)	0.993762	0.997107
		NCOA2;rs2228591	Rs2228591	1902	0.99 (-2.36,4.34)	0.563198	0.987459
		NCOA2;rs2926702	Rs2926702	1856	-0.92 (-3.26,1.43)	0.443575	0.976361
		NCOA2;rs2926703	Rs2926703	1899	0.19 (-1.94,2.33)	0.857754	0.990612
		NCOA2;rs3812429	Rs3812429	1812	0.41 (-2.05,2.87)	0.744439	0.990612
		NCOA2;rs4623463	Rs4623463	1836	0.39 (-1.27,2.04)	0.645046	0.990612
		NCOA2;rs4738077	Rs4738077	1762	0.07 (-1.88,2.01)	0.944571	0.990612
		NCOA2;rs4738078	Rs4738078	1846	0.04 (-2.07,2.15)	0.970346	0.990612
		NCOA2;rs4738080	Rs4738080	1865	-1.08 (-4.30,2.13)	0.51026	0.987459
		NCOA2;rs6472520	Rs6472520	1877	-0.47 (-2.36,1.42)	0.625087	0.987459
	NCOA3	NCOA3;rs1537306	Rs1537306	1898	-0.20 (-3.10,2.70)	0.89292	0.990612
		NCOA3;rs2076546	Rs2076546	1898	-0.27 (-3.24,2.70)	0.858088	0.990612
		NCOA3;rs2143491	Rs2143491	1852	0.68 (-1.00,2.36)	0.428533	0.976361
		NCOA3;rs2230782	Rs2230782	1798	1.44 (-1.57,4.44)	0.347895	0.976361
		NCOA3;rs2425941	Rs2425941	1881	0.56 (-1.05,2.16)	0.496789	0.987459
		NCOA3;rs3092608	Rs3092608	1895	-0.48 (-2.14,1.17)	0.567605	0.987459
		NCOA3;rs427967	Rs427967	1839	0.95 (-1.31,3.21)	0.410542	0.976361
		NCOA3;rs4810648	Rs4810648	301	-0.93 (-9.44,7.59)	0.83088	0.990612
		NCOA3;rs6066409	Rs6066409	1897	-0.09 (-1.98,1.79)	0.922099	0.990612
		NCOA3;rs6094752	Rs6094752	1388	2.70 (-1.24,6.65)	0.179064	0.941161
		NCOA3;rs6125042	Rs6125042	1749	-1.66 (-4.03,0.71)	0.169618	0.939578
		NCOA3;rs8114934	Rs8114934	1892	1.36 (-1.48,4.20)	0.348646	0.976361
	NCOA7	NCOA7;rs10223441	Rs10223441	1899	-1.64 (-3.38,0.11)	0.0661947	0.749828
		NCOA7;rs10782230	Rs10782230	1676	1.34 (-0.34,3.02)	0.118371	0.813091
		NCOA7;rs11756122	Rs11756122	368	-1.98 (-14.55,10.58)	0.757253	0.990612
		NCOA7;rs11757529	Rs11757529	1895	0.76 (-8.20,9.72)	0.867727	0.990612
		NCOA7;rs11965647	Rs11965647	1902	-2.63 (-5.80,0.55)	0.104775	0.813091
		NCOA7;rs11967627	Rs11967627	1862	0.28 (-2.30,2.86)	0.834087	0.990612
		NCOA7;rs12201564	Rs12201564	1900	0.55 (-2.90,4.00)	0.756027	0.990612
		NCOA7;rs12206695	Rs12206695	1835	-0.61 (-2.19,0.98)	0.454953	0.976361
		NCOA7;rs1268087	Rs1268087	1768	2.65 (-0.20,5.50)	0.0690153	0.749828
		NCOA7;rs1407592	Rs1407592	1868	2.13 (-2.37,6.63)	0.353037	0.976361
		NCOA7;rs17053695	Rs17053695	1903	-0.65 (-29.31,28.01)	0.964633	0.990612
		NCOA7;rs17292488	Rs17292488	1877	-0.81 (-2.52,0.91)	0.357349	0.976361
		NCOA7;rs1739384	Rs1739384	1758	-1.41 (-3.10,0.28)	0.102793	0.813091
		NCOA7;rs17708107	Rs17708107	1876	2.19 (-0.53,4.90)	0.114889	0.813091
		NCOA7;rs17745584	Rs17745584	1884	0.09 (-2.36,2.53)	0.944427	0.990612
		NCOA7;rs4897161	Rs4897161	1861	-1.78 (-3.41,-0.15)	0.0327437	0.593567
		NCOA7;rs490361	Rs490361	1856	-1.47 (-3.25,0.30)	0.10369	0.813091
		NCOA7;rs529858	Rs529858	1895	-1.75 (-7.09,3.59)	0.520712	0.987459
		NCOA7;rs549438	Rs549438	1894	1.07 (-0.65,2.79)	0.22344	0.951236
		NCOA7;rs579477	Rs579477	1889	-1.76 (-3.44,-0.07)	0.0411632	0.65703
		NCOA7;rs614031	Rs614031	1888	-0.63 (-2.27,1.01)	0.45004	0.976361
		NCOA7;rs6919947	Rs6919947	1870	-1.71 (-3.30,-0.12)	0.0348153	0.608389
		NCOA7;rs6935780	Rs6935780	1865	0.49 (-1.28,2.27)	0.586	0.987459
		NCOA7;rs715880	Rs715880	1887	-1.52 (-3.14,0.09)	0.0642668	0.749828
		NCOA7;rs7743352	Rs7743352	1900	4.15 (-3.95,12.25)	0.315813	0.976361
		NCOA7;rs9375411	Rs9375411	1894	0.76 (-0.82,2.34)	0.346431	0.976361
		NCOA7;rs9385388	Rs9385388	1710	0.93 (-0.77,2.63)	0.282685	0.973208
		NCOA7;rs9401850	Rs9401850	1870	0.75 (-0.89,2.39)	0.368432	0.976361
		NCOA7;rs9401851	Rs9401851	1812	0.62 (-0.97,2.21)	0.44568	0.976361
		NCOA7;rs9491511	Rs9491511	1871	-4.66 (-15.29,5.98)	0.390692	0.976361
		NCOA7;rs9491534	Rs9491534	1846	0.32 (-2.07,2.71)	0.791216	0.990612
	NCOR1	NCOR1;rs1079533	Rs1079533	1886	-1.12 (-2.75,0.50)	0.175067	0.941161
		NCOR1;rs11657857	Rs11657857	1894	0.64 (-1.70,2.98)	0.592057	0.987459
		NCOR1;rs12942295	Rs12942295	1887	-1.30 (-2.92,0.33)	0.118017	0.813091
		NCOR1;rs16959544	Rs16959544	1902	0.40 (-4.71,5.50)	0.878871	0.990612
		NCOR1;rs178797	Rs178797	1776	-0.75 (-2.41,0.92)	0.38106	0.976361
		NCOR1;rs178831	Rs178831	1786	-0.72 (-2.45,1.01)	0.417622	0.976361
		NCOR1;rs2285580	Rs2285580	1874	-1.03 (-2.68,0.61)	0.218203	0.951236
		NCOR1;rs7207463	Rs7207463	1526	-1.24 (-3.09,0.62)	0.191651	0.943851
	PCAF/KAT2B	PCAF/KAT2B;rs10510499	Rs10510499	1869	0.68 (-2.43,3.79)	0.668666	0.990612
		PCAF/KAT2B;rs11128934	Rs11128934	1849	-0.80 (-2.66,1.06)	0.399843	0.976361
		PCAF/KAT2B;rs11715447	Rs11715447	1901	0.33 (-2.01,2.66)	0.783614	0.990612
		PCAF/KAT2B;rs11923928	Rs11923928	1894	-0.73 (-2.68,1.22)	0.464418	0.976361
		PCAF/KAT2B;rs12636078	Rs12636078	1893	-0.51 (-2.28,1.25)	0.569202	0.987459
		PCAF/KAT2B;rs1610186	Rs1610186	1841	0.37 (-1.34,2.08)	0.67133	0.990612
		PCAF/KAT2B;rs17626938	Rs17626938	1874	2.37 (-0.36,5.11)	0.0892306	0.786874
		PCAF/KAT2B;rs17796904	Rs17796904	1822	1.08 (-1.51,3.67)	0.412971	0.976361
		PCAF/KAT2B;rs17797581	Rs17797581	1901	-0.66 (-3.00,1.68)	0.580093	0.987459
		PCAF/KAT2B;rs1915919	Rs1915919	1894	-0.34 (-1.96,1.29)	0.685499	0.990612
		PCAF/KAT2B;rs2365794	Rs2365794	1864	-0.04 (-1.66,1.58)	0.96547	0.990612
		PCAF/KAT2B;rs2623074	Rs2623074	1901	0.16 (-2.46,2.79)	0.902538	0.990612
		PCAF/KAT2B;rs2686317	Rs2686317	1866	0.22 (-1.63,2.06)	0.817369	0.990612
		PCAF/KAT2B;rs2929401	Rs2929401	1892	-0.79 (-2.45,0.88)	0.35449	0.976361
		PCAF/KAT2B;rs2929402	Rs2929402	1890	0.06 (-1.64,1.76)	0.944962	0.990612
		PCAF/KAT2B;rs2929404	Rs2929404	1890	0.22 (-1.88,2.32)	0.836907	0.990612
		PCAF/KAT2B;rs2929408	Rs2929408	782	1.07 (-2.30,4.45)	0.534284	0.987459
		PCAF/KAT2B;rs2948083	Rs2948083	1893	-3.00 (-5.99,-0.02)	0.0485768	0.657276
		PCAF/KAT2B;rs2948089	Rs2948089	1344	-1.14 (-3.96,1.69)	0.430545	0.976361
		PCAF/KAT2B;rs2948097	Rs2948097	1895	0.58 (-1.32,2.48)	0.550373	0.987459
		PCAF/KAT2B;rs3021408	Rs3021408	1898	0.03 (-1.61,1.67)	0.968362	0.990612
		PCAF/KAT2B;rs3804562	Rs3804562	1797	-0.86 (-3.43,1.70)	0.509341	0.987459
		PCAF/KAT2B;rs3804563	Rs3804563	1879	-0.34 (-2.15,1.46)	0.708384	0.990612
		PCAF/KAT2B;rs3804570	Rs3804570	1819	-0.59 (-2.53,1.36)	0.555261	0.987459
		PCAF/KAT2B;rs4020098	Rs4020098	1887	-0.74 (-2.43,0.95)	0.391892	0.976361
		PCAF/KAT2B;rs6550373	Rs6550373	1863	-0.65 (-2.38,1.08)	0.461497	0.976361
		PCAF/KAT2B;rs6765791	Rs6765791	1895	-0.27 (-1.88,1.34)	0.74076	0.990612
		PCAF/KAT2B;rs6806287	Rs6806287	1785	-1.00 (-2.99,0.98)	0.322401	0.976361
		PCAF/KAT2B;rs7617840	Rs7617840	1879	0.45 (-1.19,2.09)	0.588734	0.987459
		PCAF/KAT2B;rs7627847	Rs7627847	1457	-0.16 (-2.07,1.76)	0.872513	0.990612
		PCAF/KAT2B;rs7628915	Rs7628915	1777	0.16 (-1.56,1.89)	0.852549	0.990612
		PCAF/KAT2B;rs977162	Rs977162	1892	-0.45 (-2.36,1.47)	0.648013	0.990612
		PCAF/KAT2B;rs9819739	Rs9819739	1899	1.08 (-0.94,3.09)	0.295495	0.973208
		PCAF/KAT2B;rs9829896	Rs9829896	1891	-0.89 (-2.60,0.81)	0.305032	0.976361
	PRMT1	PRMT1;rs10415880	Rs10415880	1862	-0.78 (-2.55,0.99)	0.385544	0.976361
		PRMT1;rs3745469	Rs3745469	1894	-1.55 (-4.20,1.10)	0.253014	0.958079
		PRMT1;rs975484	Rs975484	1851	-0.54 (-2.35,1.27)	0.560097	0.987459
	PTH	PTH;rs10500784	Rs10500784	1885	-1.03 (-2.74,0.67)	0.233407	0.951236
		PTH;rs1459015	Rs1459015	1888	1.85 (-0.13,3.84)	0.0678625	0.749828
		PTH;rs192802	Rs192802	1797	1.16 (-0.64,2.97)	0.207322	0.951236
		PTH;rs6254	Rs6254	1869	-0.96 (-2.67,0.74)	0.268313	0.973208
		PTH;rs6256	Rs6256	1894	0.86 (-1.38,3.09)	0.453176	0.976361
		PTH;rs751610	Rs751610	1382	1.28 (-0.95,3.51)	0.260541	0.973208
		PTH;rs9630182	Rs9630182	1837	1.05 (-0.62,2.72)	0.218788	0.951236
	RXRA	RXRA;rs1007971	Rs1007971	1778	1.49 (-0.49,3.47)	0.141399	0.885822
		RXRA;rs1045570	Rs1045570	1896	0.18 (-1.99,2.35)	0.871183	0.990612
		RXRA;rs10776909	Rs10776909	1889	0.64 (-1.33,2.61)	0.522214	0.987459
		RXRA;rs10881582	Rs10881582	1645	0.84 (-1.30,2.99)	0.44211	0.976361
		RXRA;rs10881583	Rs10881583	1892	0.60 (-1.31,2.50)	0.537942	0.987459
		RXRA;rs11103482	Rs11103482	1839	-0.16 (-2.69,2.37)	0.901845	0.990612
		RXRA;rs11185659	Rs11185659	1892	-0.38 (-2.31,1.55)	0.699656	0.990612
		RXRA;rs12339187	Rs12339187	1852	-0.20 (-2.34,1.95)	0.85842	0.990612
		RXRA;rs1536475	Rs1536475	340	0.53 (-5.89,6.95)	0.871953	0.990612
		RXRA;rs1805348	Rs1805348	1887	-1.06 (-7.30,5.18)	0.739799	0.990612
		RXRA;rs1887309	Rs1887309	1873	0.31 (-1.42,2.04)	0.722817	0.990612
		RXRA;rs3118523	Rs3118523	1890	1.98 (-0.04,4.00)	0.0544752	0.682542
		RXRA;rs3118526	Rs3118526	1869	2.45 (0.01,4.88)	0.0493729	0.657276
		RXRA;rs3118536	Rs3118536	1852	0.66 (-1.48,2.81)	0.544645	0.987459
		RXRA;rs3118571	Rs3118571	1848	0.34 (-1.34,2.02)	0.690103	0.990612
		RXRA;rs3132288	Rs3132288	1855	0.32 (-1.35,1.99)	0.705229	0.990612
		RXRA;rs3132294	Rs3132294	1900	0.40 (-1.47,2.26)	0.676241	0.990612
		RXRA;rs3132301	Rs3132301	1231	2.25 (-0.21,4.70)	0.0734705	0.749828
		RXRA;rs34312136	Rs34312136	1903	-0.74 (-2.41,0.93)	0.385265	0.976361
		RXRA;rs35079168	Rs35079168	1883	0.26 (-1.41,1.93)	0.762389	0.990612
		RXRA;rs4240705	Rs4240705	1761	-0.25 (-1.95,1.45)	0.777214	0.990612
		RXRA;rs4842196	Rs4842196	1887	0.49 (-1.34,2.31)	0.59976	0.987459
		RXRA;rs4917348	Rs4917348	1844	-0.29 (-2.52,1.94)	0.801067	0.990612
		RXRA;rs6537944	Rs6537944	1876	-0.40 (-3.31,2.51)	0.787898	0.990612
		RXRA;rs7039190	Rs7039190	1899	0.21 (-3.93,4.36)	0.919206	0.990612
		RXRA;rs748964	Rs748964	378	3.33 (-2.52,9.18)	0.264911	0.973208
		RXRA;rs749759	Rs749759	1892	0.31 (-1.57,2.19)	0.746595	0.990612
		RXRA;rs7861779	Rs7861779	1846	-0.55 (-3.11,2.01)	0.673783	0.990612
		RXRA;rs7864987	Rs7864987	1898	0.45 (-1.37,2.27)	0.627412	0.987459
		RXRA;rs875444	Rs875444	1784	-0.43 (-2.11,1.24)	0.611671	0.987459
		RXRA;rs881658	Rs881658	1810	-0.22 (-2.03,1.60)	0.815486	0.990612
		RXRA;rs914853	Rs914853	1818	-0.35 (-2.18,1.48)	0.709012	0.990612
		RXRA;rs9409929	Rs9409929	1790	-0.18 (-1.95,1.59)	0.838861	0.990612
		RXRA;rs9615	Rs9615	1372	4.31 (-0.32,8.95)	0.0683442	0.749828
	RXRB	RXRB;rs1050673	Rs1050673	1803	-0.83 (-2.65,0.98)	0.366452	0.976361
		RXRB;rs2076310	Rs2076310	1894	0.22 (-1.67,2.11)	0.819228	0.990612
		RXRB;rs2269346	Rs2269346	1782	0.24 (-3.11,3.59)	0.890037	0.990612
		RXRB;rs2744537	Rs2744537	1897	-0.64 (-2.40,1.12)	0.475884	0.98163
		RXRB;rs439205	Rs439205	1855	0.17 (-1.74,2.09)	0.858615	0.990612
		RXRB;rs6531	Rs6531	1814	-0.44 (-2.23,1.34)	0.627793	0.987459
		RXRB;rs9277935	Rs9277935	1848	0.32 (-1.78,2.41)	0.766783	0.990612
	RXRG	RXRG;rs100537	Rs100537	1895	0.61 (-0.98,2.20)	0.451593	0.976361
		RXRG;rs10489745	Rs10489745	1876	1.39 (-1.69,4.46)	0.377554	0.976361
		RXRG;rs10800098	Rs10800098	1654	1.96 (-2.63,6.55)	0.403308	0.976361
		RXRG;rs10918172	Rs10918172	1900	-0.83 (-2.90,1.25)	0.435622	0.976361
		RXRG;rs1467664	Rs1467664	1849	0.26 (-2.10,2.62)	0.826466	0.990612
		RXRG;rs157864	Rs157864	1893	0.71 (-1.53,2.95)	0.535485	0.987459
		RXRG;rs157869	Rs157869	1797	-0.17 (-1.92,1.58)	0.849028	0.990612
		RXRG;rs166899	Rs166899	1892	-1.47 (-3.71,0.76)	0.197039	0.951236
		RXRG;rs17429123	Rs17429123	1868	-1.38 (-3.44,0.68)	0.190281	0.943851
		RXRG;rs1952179	Rs1952179	1899	2.09 (-1.04,5.22)	0.190622	0.943851
		RXRG;rs2194899	Rs2194899	1899	-0.60 (-2.27,1.07)	0.48275	0.98163
		RXRG;rs283694	Rs283694	1877	0.56 (-1.20,2.31)	0.534597	0.987459
		RXRG;rs283695	Rs283695	1891	0.75 (-0.89,2.39)	0.371534	0.976361
		RXRG;rs285480	Rs285480	1898	1.04 (-0.89,2.98)	0.289809	0.973208
		RXRG;rs285482	Rs285482	1871	-1.08 (-2.85,0.69)	0.232599	0.951236
		RXRG;rs3753898	Rs3753898	1893	0.36 (-1.67,2.40)	0.725192	0.990612
		RXRG;rs3767333	Rs3767333	1895	-0.29 (-2.19,1.62)	0.766555	0.990612
		RXRG;rs3767339	Rs3767339	1892	0.14 (-1.57,1.85)	0.871506	0.990612
		RXRG;rs3767344	Rs3767344	1867	0.41 (-1.24,2.06)	0.623965	0.987459
		RXRG;rs41424948	Rs41424948	1903	-0.13 (-1.75,1.50)	0.877377	0.990612
		RXRG;rs466639	Rs466639	1897	-0.11 (-2.52,2.29)	0.928033	0.990612
		RXRG;rs6669441	Rs6669441	1900	-0.18 (-2.19,1.83)	0.859413	0.990612
		RXRG;rs746332	Rs746332	1894	0.67 (-1.76,3.09)	0.590209	0.987459
		RXRG;rs752739	Rs752739	1831	0.99 (-0.96,2.95)	0.320054	0.976361
	SMARCA2	SMARCA2;rs2296212	Rs2296212	1882	-0.34 (-2.93,2.25)	0.796723	0.990612
	SMARCA4	SMARCA4;rs12232780	Rs12232780	1900	1.20 (-0.49,2.90)	0.164294	0.935194
		SMARCA4;rs12610693	Rs12610693	1897	1.05 (-0.61,2.71)	0.213897	0.951236
		SMARCA4;rs12983316	Rs12983316	1841	-1.16 (-3.64,1.32)	0.358939	0.976361
		SMARCA4;rs13345127	Rs13345127	1891	0.21 (-2.24,2.67)	0.86578	0.990612
		SMARCA4;rs17001095	Rs17001095	1896	1.51 (-0.14,3.17)	0.0735986	0.749828
		SMARCA4;rs2072382	Rs2072382	1891	0.46 (-3.89,4.82)	0.835526	0.990612
		SMARCA4;rs2163800	Rs2163800	1734	1.60 (-0.13,3.33)	0.0693615	0.749828
		SMARCA4;rs28997582	Rs28997582	1861	0.76 (-2.65,4.17)	0.660652	0.990612
		SMARCA4;rs3786721	Rs3786721	1878	-1.61 (-3.22,0.01)	0.0513277	0.66758
		SMARCA4;rs3786724	Rs3786724	1899	-0.96 (-3.99,2.06)	0.532736	0.987459
		SMARCA4;rs6511718	Rs6511718	1821	0.85 (-0.90,2.60)	0.341515	0.976361
		SMARCA4;rs7275	Rs7275	1882	1.06 (-0.67,2.79)	0.231016	0.951236
	SMARCC1	SMARCC1;rs11714840	Rs11714840	1889	1.96 (0.28,3.64)	0.0222671	0.589822
		SMARCC1;rs2291903	Rs2291903	1868	1.30 (-2.16,4.76)	0.460314	0.976361
		SMARCC1;rs3755637	Rs3755637	1795	-1.07 (-2.83,0.69)	0.234138	0.951236
		SMARCC1;rs4858843	Rs4858843	1875	-1.22 (-3.02,0.58)	0.184476	0.941161
		SMARCC1;rs5016899	Rs5016899	1533	-1.39 (-4.94,2.16)	0.443209	0.976361
	SMARCD1	SMARCD1;rs3782323	Rs3782323	1897	-0.35 (-2.28,1.57)	0.718985	0.990612
		SMARCD1;rs706794	rs706794	1886	-1.41 (-3.09,0.26)	0.097278	0.804225
		SMARCD1;rs836177	Rs836177	1893	4.80 (1.92,7.68)	0.00111597	0.11254
	SMARCE1	SMARCE1;rs11654834	Rs11654834	1811	-0.19 (-1.84,1.46)	0.823137	0.990612
		SMARCE1;rs11659024	Rs11659024	1898	0.24 (-1.37,1.86)	0.767592	0.990612
		SMARCE1;rs757411	Rs757411	1893	-0.32 (-1.98,1.33)	0.700791	0.990612
		SMARCE1;rs757412	Rs757412	1805	0.69 (-2.10,3.48)	0.625906	0.987459
		SMARCE1;rs8068721	Rs8068721	1183	-0.36 (-2.42,1.71)	0.735066	0.990612
	SNW1	SNW1;rs11621593	Rs11621593	1883	1.95 (-0.30,4.19)	0.0902765	0.786874
		SNW1;rs11624704	Rs11624704	1867	4.61 (2.23,6.99)	0.000154231	0.0328513
		SNW1;rs176978	Rs176978	1887	0.84 (-1.71,3.39)	0.519961	0.987459
		SNW1;rs17752640	Rs17752640	1872	0.73 (-2.74,4.20)	0.68161	0.990612
		SNW1;rs17752707	Rs17752707	1897	-3.34 (-7.17,0.48)	0.0871104	0.781243
		SNW1;rs17825620	Rs17825620	1877	0.88 (-1.14,2.90)	0.394044	0.976361
		SNW1;rs4346144	Rs4346144	1874	0.65 (-1.98,3.29)	0.627355	0.987459
		SNW1;rs4903633	Rs4903633	1875	-2.18 (-5.08,0.71)	0.139977	0.885258
		SNW1;rs7145979	Rs7145979	1870	0.23 (-1.43,1.89)	0.788173	0.990612
		SNW1;rs7151685	Rs7151685	1874	0.69 (-1.00,2.39)	0.42231	0.976361
	SUPT16H	SUPT16H;rs10138699	rs10138699	1879	-2.01 (-4.95,0.94)	0.181537	0.941161
		SUPT16H;rs11624716	Rs11624716	1896	-1.50 (-4.32,1.33)	0.300129	0.973208
		SUPT16H;rs17197086	rs17197086	1889	0.24 (-2.31,2.78)	0.855051	0.990612
		SUPT16H;rs17197093	Rs17197093	1393	-0.56 (-3.77,2.65)	0.732238	0.990612
		SUPT16H;rs3736824	Rs3736824	1895	0.60 (-1.01,2.21)	0.467068	0.977745
		SUPT16H;rs3762158	Rs3762158	1900	-2.16 (-5.49,1.18)	0.205451	0.951236
		SUPT16H;rs7161723	Rs7161723	1889	1.86 (-0.95,4.68)	0.194272	0.951236
		SUPT16H;rs8021793	Rs8021793	1887	0.11 (-4.82,5.04)	0.964451	0.990612
	TOP2B	TOP2B;rs1001647	Rs1001647	1845	-0.24 (-2.32,1.84)	0.822073	0.990612
		TOP2B;rs1561033	Rs1561033	1882	0.87 (-2.30,4.04)	0.589773	0.987459
		TOP2B;rs17527352	Rs17527352	1820	0.15 (-2.14,2.43)	0.900645	0.990612
		TOP2B;rs2037860	Rs2037860	1891	-0.94 (-3.36,1.49)	0.448958	0.976361
		TOP2B;rs7621736	Rs7621736	1817	-0.90 (-3.78,1.98)	0.541424	0.987459
		TOP2B;rs7638216	Rs7638216	1806	-0.17 (-1.96,1.63)	0.853208	0.990612
	TRPV5	TRPV5;rs1568760	Rs1568760	1861	1.92 (-1.07,4.91)	0.20723	0.951236
		TRPV5;rs34960591	Rs34960591	1902	-0.09 (-3.57,3.39)	0.957584	0.990612
		TRPV5;rs4252372	Rs4252372	1898	1.54 (-3.41,6.50)	0.541262	0.987459
		TRPV5;rs4252381	Rs4252381	1810	1.53 (-1.79,4.84)	0.366522	0.976361
		TRPV5;rs4252424	Rs4252424	1868	-0.70 (-2.72,1.32)	0.495856	0.987459
		TRPV5;rs4252435	Rs4252435	1895	1.70 (-1.18,4.57)	0.247675	0.958079
		TRPV5;rs4252499	Rs4252499	1903	4.65 (-2.07,11.37)	0.175496	0.941161
		TRPV5;rs4252535	Rs4252535	1878	-0.33 (-4.20,3.55)	0.86936	0.990612
		TRPV5;rs8176044	Rs8176044	1892	-0.57 (-2.22,1.07)	0.494945	0.987459
	TRPV6	TRPV6;rs4987568	Rs4987568	1900	1.94 (-1.91,5.79)	0.323423	0.976361
		TRPV6;rs4987617	Rs4987617	1901	3.20 (0.15,6.24)	0.0401215	0.65703
		TRPV6;rs4987622	Rs4987622	1886	3.43 (0.37,6.49)	0.0283834	0.589822
		TRPV6;rs4987655	Rs4987655	1901	3.39 (0.38,6.40)	0.0273017	0.589822
		TRPV6;rs4987657	Rs4987657	1894	17.47 (-11.18,46.12)	0.232252	0.951236
		TRPV6;rs4987665	Rs4987665	1616	4.13 (0.82,7.44)	0.0145454	0.552917
		TRPV6;rs4987667	rs4987667	1898	3.49 (0.45,6.53)	0.024704	0.589822
		TRPV6;rs4987668	Rs4987668	1901	3.47 (0.44,6.50)	0.0248786	0.589822
		TRPV6;rs4987682	Rs4987682	1880	3.80 (0.66,6.94)	0.0176939	0.552917
		TRPV6;rs4987691	Rs4987691	1876	4.09 (1.21,6.97)	0.00550456	0.29179
		TRPV6;rs6944571	Rs6944571	361	2.42 (-1.72,6.55)	0.252704	0.958079
		TRPV6;rs6951428	Rs6951428	1271	1.30 (-3.69,6.29)	0.61059	0.987459
		VDR;rs10783219	Rs10783219	1764	-0.27 (-1.99,1.45)	0.76013	0.990612
		VDR;rs11168275	Rs11168275	1859	0.38 (-1.49,2.26)	0.688436	0.990612
		VDR;rs11168287	Rs11168287	1884	0.03 (-1.54,1.60)	0.969296	0.990612
		VDR;rs11568820	Rs11568820	1900	-0.81 (-2.78,1.16)	0.421564	0.976361
		VDR;rs11574026	Rs11574026	1900	0.36 (-2.07,2.79)	0.769728	0.990612
	VDR	VDR;rs11574046	Rs11574046	1867	0.17 (-3.00,3.34)	0.915701	0.990612
		VDR;rs11574066	Rs11574066	1901	(-,-)	NA	NA
		VDR;rs11574077	Rs11574077	1898	4.40 (0.86,7.94)	0.0150277	0.552917
		VDR;rs11574085	Rs11574085	1881	0.30 (-3.21,3.81)	0.866706	0.990612
		VDR;rs11608702	Rs11608702	1893	1.43 (-0.25,3.11)	0.095367	0.804225
		VDR;rs12581281	Rs12581281	1902	1.12 (-4.28,6.52)	0.684295	0.990612
		VDR;rs12721364	Rs12721364	1899	-0.61 (-2.91,1.68)	0.600606	0.987459
		VDR;rs1540339	Rs1540339	372	-1.70 (-5.93,2.53)	0.43035	0.976361
		VDR;rs1544410	Rs1544410	1882	1.52 (-0.12,3.15)	0.0687308	0.749828
		VDR;rs2107301	Rs2107301	1885	-1.97 (-3.77,-0.17)	0.0325199	0.593567
		VDR;rs2189480	Rs2189480	1859	0.76 (-0.96,2.49)	0.384717	0.976361
		VDR;rs2228570	rs2228570	1858	-0.05 (-1.71,1.61)	0.953821	0.990612
		VDR;rs2238135	Rs2238135	1882	0.92 (-0.95,2.79)	0.335672	0.976361
		VDR;rs2238136	Rs2238136	1895	0.42 (-1.41,2.26)	0.64937	0.990612
		VDR;rs2239181	Rs2239181	1898	0.75 (-1.62,3.13)	0.534855	0.987459
		VDR;rs2239182	Rs2239182	1850	-2.46 (-4.05,-0.87)	0.00248358	0.192364
		VDR;rs2239186	Rs2239186	1897	-1.01 (-3.05,1.04)	0.333783	0.976361
		VDR;rs2254210	Rs2254210	1845	-0.78 (-2.44,0.88)	0.356051	0.976361
		VDR;rs2283342	Rs2283342	1861	0.22 (-2.19,2.62)	0.858579	0.990612
		VDR;rs2853564	Rs2853564	1861	-0.74 (-2.40,0.91)	0.377545	0.976361
		VDR;rs3782905	Rs3782905	1892	1.05 (-0.69,2.79)	0.237802	0.958079
		VDR;rs3819545	Rs3819545	1875	0.02 (-1.65,1.69)	0.979677	0.992491
		VDR;rs6580639	Rs6580639	1890	-2.76 (-6.81,1.29)	0.181519	0.941161
		VDR;rs7136534	Rs7136534	312	0.53 (-4.86,5.91)	0.848022	0.990612
		VDR;rs7139166	Rs7139166	911	1.91 (-0.66,4.49)	0.144963	0.888553
		VDR;rs7299460	Rs7299460	1897	-0.10 (-1.82,1.63)	0.913351	0.990612
		VDR;rs731236	rs731236	1024	1.28 (-1.09,3.64)	0.290509	0.973208
		VDR;rs7418	Rs7418	1879	0.77 (-1.13,2.66)	0.427369	0.976361
		VDR;rs7970314	Rs7970314	1867	-0.61 (-2.52,1.30)	0.528815	0.987459
		VDR;rs886441	Rs886441	1867	-1.41 (-3.49,0.67)	0.183602	0.941161
			*Adjusted for age, sex, center, and case-control status.

## Sheet: Supplementary Table 4
	Supplementary Table 4. Associations of SNPs with CRC risk overall and by tumor location (colon vs. rectum) using unconditional logistic regression with adjustment for age at recruitment, study center and sex, the EPIC study, 1992-2003.
				Colorectal Cancer					Colon Cancer					Rectal Cancer
	Gene	SNP	Genotype	Case	Control	OR (95% CI)	P	P BH	Case	Control	OR (95% CI)	P	P BH	Case	Control	OR (95% CI)	P	P BH
	Genes involved in vitamin D metabolism
	CYP24A1	rs1570669	AA	637	606	1.00 (ref)	0.194401	0.903158	412	606	1.00 (ref)	0.079343	0.858978	225	606	1.00 (ref)	0.810719	0.998465
			AG	590	631	0.89 (0.76,1.04)			360	631	0.83 (0.69,1.00)			230	631	0.99 (0.80,1.24)
			GG	167	148	1.07 (0.84,1.38)			107	148	1.06 (0.80,1.40)			60	148	1.11 (0.79,1.56)
			Additive*	1394	1385	0.98 (0.88,1.10)	0.789339	0.997512	879	1385	0.96 (0.84,1.09)	0.517196	0.981487	515	1385	1.03 (0.89,1.21)	0.679683	0.980927
			Dominant (AG + GG vs. AA)	1394	1385	0.92 (0.79,1.07)	0.298303	0.908669	879	1385	0.87 (0.74,1.04)	0.12321	0.895653	515	1385	1.02 (0.83,1.25)	0.884625	0.989054
			Recessive (GG vs. AA + AG)	1394	1385	1.14 (0.90,1.44)	0.285946	0.983289	879	1385	1.15 (0.88,1.51)	0.291949	0.99075	515	1385	1.11 (0.81,1.54)	0.518749	0.997105
		rs2181874	GG	838	782	1.00 (ref)	0.108737	0.871526	549	782	1.00 (ref)	0.0105623	0.530957	289	782	1.00 (ref)	0.860493	0.998465
			GA	501	546	0.85 (0.73,1.00)			304	546	0.78 (0.65,0.93)			197	546	0.98 (0.79,1.22)
			AA	78	87	0.84 (0.61,1.16)			44	87	0.70 (0.48,1.03)			34	87	1.11 (0.73,1.70)
			Additive*	1417	1415	0.88 (0.78,1.00)	0.0463995	0.837905	897	1415	0.81 (0.70,0.93)	0.00314383	0.342415	520	1415	1.02 (0.86,1.20)	0.83373	0.9965
			Dominant (GA + AA vs. GG)	1417	1415	0.85 (0.73,0.99)	0.0353727	0.700487	897	1415	0.77 (0.65,0.91)	0.0029664	0.377361	520	1415	1.00 (0.81,1.23)	0.996706	0.998297
			Recessive (AA vs. GG + GA)	1417	1415	0.89 (0.65,1.23)	0.484614	0.999936	897	1415	0.77 (0.53,1.13)	0.179881	0.99075	520	1415	1.12 (0.74,1.70)	0.598354	0.997105
		rs2209314	AA	818	778	1.00 (ref)	0.285719	0.940849	526	778	1.00 (ref)	0.141606	0.958809	292	778	1.00 (ref)	0.923127	0.998465
			AG	500	535	0.89 (0.76,1.04)			308	535	0.85 (0.71,1.02)			192	535	0.96 (0.77,1.19)
			GG	81	89	0.87 (0.63,1.19)			48	89	0.79 (0.54,1.14)			33	89	1.01 (0.66,1.55)
			Additive*	1399	1402	0.91 (0.80,1.03)	0.129413	0.893705	882	1402	0.87 (0.75,1.00)	0.0517687	0.845611	517	1402	0.98 (0.83,1.16)	0.820544	0.9965
			Dominant (AG + GG vs. AA)	1399	1402	0.89 (0.76,1.03)	0.115068	0.876046	882	1402	0.84 (0.71,1.00)	0.0528767	0.847884	517	1402	0.97 (0.79,1.19)	0.737968	0.988428
			Recessive (GG vs. AA + AG)	1399	1402	0.91 (0.66,1.24)	0.550484	0.999936	882	1402	0.84 (0.58,1.21)	0.347167	0.99075	517	1402	1.02 (0.67,1.56)	0.909772	0.997105
		rs2248359	GG	510	515	1.00 (ref)	0.607997	0.977081	341	515	1.00 (ref)	0.244741	0.977232	169	515	1.00 (ref)	0.139425	0.921471
			GA	620	637	0.98 (0.83,1.16)			375	637	0.87 (0.72,1.05)			245	637	1.24 (0.99,1.57)
			AA	221	203	1.10 (0.87,1.39)			142	203	1.02 (0.79,1.32)			79	203	1.27 (0.92,1.75)
			Additive*	1351	1355	1.04 (0.93,1.16)	0.533818	0.97802	858	1355	0.98 (0.86,1.11)	0.723422	0.986214	493	1355	1.15 (0.99,1.34)	0.0737662	0.705088
			Dominant (GA + AA vs. GG)	1351	1355	1.01 (0.86,1.19)	0.87832	0.990522	858	1355	0.90 (0.75,1.08)	0.263581	0.954412	493	1355	1.25 (1.00,1.56)	0.0476345	0.732425
			Recessive (AA vs. GG + GA)	1351	1355	1.11 (0.90,1.37)	0.326252	0.985701	858	1355	1.10 (0.87,1.40)	0.416592	0.99075	493	1355	1.12 (0.84,1.49)	0.447497	0.986454
		rs2296239	GG	902	898	1.00 (ref)	0.886103	0.998205	573	898	1.00 (ref)	0.928089	0.995233	329	898	1.00 (ref)	0.550635	0.998465
			GA	448	457	0.98 (0.83,1.15)			285	457	0.97 (0.81,1.17)			163	457	0.99 (0.79,1.23)
			AA	65	61	1.07 (0.74,1.53)			37	61	0.94 (0.62,1.44)			28	61	1.29 (0.80,2.07)
			Additive*	1415	1416	1.00 (0.88,1.14)	0.992799	0.999735	895	1416	0.97 (0.84,1.13)	0.699296	0.986214	520	1416	1.05 (0.88,1.25)	0.57161	0.973084
			Dominant (GA + AA vs. GG)	1415	1416	0.99 (0.85,1.15)	0.872294	0.990522	895	1416	0.97 (0.81,1.15)	0.714591	0.977938	520	1416	1.02 (0.83,1.26)	0.836737	0.988428
			Recessive (AA vs. GG + GA)	1415	1416	1.08 (0.75,1.54)	0.68917	0.999936	895	1416	0.95 (0.63,1.45)	0.824978	0.997721	520	1416	1.29 (0.81,2.06)	0.277241	0.986454
		rs2426498	GG	1078	1080	1.00 (ref)	0.263554	0.928476	684	1080	1.00 (ref)	0.878165	0.995233	394	1080	1.00 (ref)	0.0387764	0.881742
			GC	271	274	0.99 (0.82,1.20)			173	274	0.99 (0.80,1.23)			98	274	0.98 (0.76,1.28)
			CC	34	22	1.57 (0.91,2.71)			16	22	1.18 (0.61,2.27)			18	22	2.29 (1.21,4.37)
			Additive*	1383	1376	1.07 (0.91,1.25)	0.427128	0.958231	873	1376	1.01 (0.84,1.22)	0.876378	0.990677	510	1376	1.16 (0.93,1.43)	0.1825	0.882838
			Dominant (GC + CC vs. GG)	1383	1376	1.03 (0.86,1.24)	0.730725	0.970342	873	1376	1.00 (0.81,1.23)	0.985863	0.994378	510	1376	1.08 (0.84,1.39)	0.536239	0.965378
			Recessive (CC vs. GG + GC)	1383	1376	1.57 (0.91,2.71)	0.103165	0.931495	873	1376	1.18 (0.61,2.28)	0.618536	0.99075	510	1376	2.30 (1.21,4.37)	0.0108736	0.939462
		rs2585413	GG	670	654	1.00 (ref)	0.417155	0.95768	425	654	1.00 (ref)	0.0636102	0.822179	245	654	1.00 (ref)	0.865684	0.998465
			GA	528	527	0.98 (0.83,1.15)			331	527	0.97 (0.80,1.16)			197	527	1.02 (0.82,1.27)
			AA	95	113	0.82 (0.61,1.10)			49	113	0.65 (0.45,0.93)			46	113	1.11 (0.76,1.62)
			Additive*	1293	1294	0.94 (0.83,1.06)	0.298208	0.921281	805	1294	0.88 (0.76,1.01)	0.0703982	0.919895	488	1294	1.04 (0.88,1.22)	0.633115	0.975107
			Dominant (GA + AA vs. GG)	1293	1294	0.95 (0.82,1.11)	0.535404	0.939842	805	1294	0.91 (0.76,1.09)	0.293151	0.95596	488	1294	1.04 (0.84,1.28)	0.739924	0.988428
			Recessive (AA vs. GG + GA)	1293	1294	0.83 (0.62,1.10)	0.193087	0.958279	805	1294	0.66 (0.46,0.94)	0.0204329	0.861822	488	1294	1.10 (0.76,1.58)	0.613099	0.997105
		rs2585415	GG	614	587	1.00 (ref)	0.593136	0.97639	392	587	1.00 (ref)	0.357859	0.995233	222	587	1.00 (ref)	0.75269	0.998465
			GA	623	641	0.93 (0.79,1.09)			401	641	0.93 (0.77,1.11)			222	641	0.95 (0.76,1.19)
			AA	169	176	0.92 (0.72,1.17)			99	176	0.82 (0.62,1.09)			70	176	1.07 (0.78,1.48)
			Additive*	1406	1404	0.95 (0.85,1.06)	0.351411	0.933792	892	1404	0.91 (0.80,1.04)	0.155878	0.919895	514	1404	1.01 (0.87,1.18)	0.87318	0.9965
			Dominant (GA + AA vs. GG)	1406	1404	0.92 (0.80,1.07)	0.307434	0.908669	892	1404	0.90 (0.76,1.07)	0.242909	0.954412	514	1404	0.98 (0.80,1.20)	0.842872	0.988428
			Recessive (AA vs. GG + GA)	1406	1404	0.96 (0.76,1.20)	0.702672	0.999936	892	1404	0.86 (0.66,1.11)	0.246005	0.99075	514	1404	1.10 (0.81,1.49)	0.535383	0.997105
		rs2585424	CC	1096	1090	1.00 (ref)	0.899379	0.998205	682	1090	1.00 (ref)	0.531347	0.995233	414	1090	1.00 (ref)	0.783144	0.998465
			CA	223	216	1.03 (0.84,1.27)			151	216	1.10 (0.87,1.39)			72	216	0.92 (0.68,1.23)
			AA	12	10	1.18 (0.51,2.75)			9	10	1.45 (0.58,3.60)			3	10	0.76 (0.21,2.81)
			Additive*	1331	1316	1.04 (0.86,1.26)	0.687858	0.988751	842	1316	1.12 (0.91,1.38)	0.283572	0.95727	489	1316	0.91 (0.69,1.19)	0.490418	0.957568
			Dominant (CA + AA vs. CC)	1331	1316	1.04 (0.85,1.27)	0.73205	0.970342	842	1316	1.12 (0.89,1.40)	0.332683	0.95596	489	1316	0.91 (0.68,1.21)	0.516608	0.965378
			Recessive (AA vs. CC + CA)	1331	1316	1.17 (0.50,2.73)	0.710884	0.999936	842	1316	1.42 (0.57,3.54)	0.448654	0.99075	489	1316	0.77 (0.21,2.85)	0.701169	0.997105
		rs2585428	GG	413	406	1.00 (ref)	0.575936	0.972576	268	406	1.00 (ref)	0.146617	0.958809	145	406	1.00 (ref)	0.770368	0.998465
			GA	705	691	1.00 (0.84,1.19)			454	691	0.98 (0.81,1.20)			251	691	1.02 (0.80,1.29)
			AA	296	319	0.91 (0.73,1.12)			174	319	0.80 (0.63,1.02)			122	319	1.10 (0.83,1.47)
			Additive*	1414	1416	0.96 (0.86,1.06)	0.391111	0.953835	896	1416	0.90 (0.80,1.02)	0.0976698	0.919895	518	1416	1.05 (0.91,1.21)	0.519802	0.967616
			Dominant (GA + AA vs. GG)	1414	1416	0.97 (0.82,1.14)	0.701836	0.965622	896	1416	0.93 (0.77,1.12)	0.418654	0.95596	518	1416	1.04 (0.83,1.31)	0.721903	0.988428
			Recessive (AA vs. GG + GA)	1414	1416	0.91 (0.76,1.09)	0.293756	0.983289	896	1416	0.81 (0.66,1.00)	0.0509315	0.973242	518	1416	1.09 (0.86,1.39)	0.47631	0.997105
		rs2762926	CC	397	430	1.00 (ref)	0.313884	0.945666	254	430	1.00 (ref)	0.705687	0.995233	143	430	1.00 (ref)	0.163534	0.952007
			CA	634	621	1.11 (0.93,1.33)			398	621	1.08 (0.88,1.33)			236	621	1.18 (0.92,1.51)
			AA	273	253	1.17 (0.94,1.46)			164	253	1.09 (0.84,1.40)			109	253	1.32 (0.98,1.79)
			Additive*	1304	1304	1.09 (0.97,1.21)	0.137598	0.893705	816	1304	1.05 (0.92,1.19)	0.468659	0.981487	488	1304	1.15 (0.99,1.34)	0.0583769	0.663953
			Dominant (CA + AA vs. CC)	1304	1304	1.13 (0.96,1.33)	0.150788	0.894985	816	1304	1.08 (0.90,1.31)	0.404021	0.95596	488	1304	1.22 (0.97,1.54)	0.0864659	0.811309
			Recessive (AA vs. CC + CA)	1304	1304	1.10 (0.91,1.33)	0.333937	0.985701	816	1304	1.04 (0.83,1.29)	0.753521	0.99075	488	1304	1.20 (0.93,1.55)	0.169497	0.939462
		rs2762929	AA	523	512	1.00 (ref)	0.891766	0.998205	340	512	1.00 (ref)	0.510363	0.995233	183	512	1.00 (ref)	0.644703	0.998465
			AG	661	671	0.96 (0.82,1.13)			415	671	0.92 (0.77,1.11)			246	671	1.07 (0.85,1.34)
			GG	215	217	0.97 (0.77,1.22)			128	217	0.87 (0.67,1.13)			87	217	1.15 (0.85,1.56)
			Additive*	1399	1400	0.98 (0.88,1.09)	0.707479	0.989375	883	1400	0.93 (0.82,1.05)	0.249281	0.954353	516	1400	1.07 (0.93,1.24)	0.350173	0.925584
			Dominant (AG + GG vs. AA)	1399	1400	0.96 (0.83,1.12)	0.636144	0.963936	883	1400	0.91 (0.76,1.08)	0.285109	0.95596	516	1400	1.09 (0.88,1.35)	0.43836	0.964065
			Recessive (GG vs. AA + AG)	1399	1400	0.99 (0.81,1.22)	0.932056	0.999936	883	1400	0.91 (0.72,1.16)	0.43934	0.99075	516	1400	1.11 (0.84,1.47)	0.45165	0.986454
		rs2762932	AA	1006	988	1.00 (ref)	0.620577	0.977081	640	988	1.00 (ref)	0.520124	0.995233	366	988	1.00 (ref)	0.719238	0.998465
			AG	373	396	0.93 (0.78,1.10)			231	396	0.89 (0.74,1.08)			142	396	0.99 (0.79,1.25)
			GG	31	34	0.89 (0.54,1.46)			22	34	0.95 (0.55,1.65)			9	34	0.73 (0.34,1.56)
			Additive*	1410	1418	0.93 (0.81,1.08)	0.331823	0.921281	893	1418	0.92 (0.78,1.08)	0.313268	0.95727	517	1418	0.95 (0.78,1.17)	0.643856	0.975107
			Dominant (AG + GG vs. AA)	1410	1418	0.92 (0.78,1.09)	0.336	0.908669	893	1418	0.90 (0.75,1.08)	0.262097	0.954412	517	1418	0.97 (0.78,1.21)	0.797083	0.988428
			Recessive (GG vs. AA + AG)	1410	1418	0.91 (0.55,1.49)	0.695913	0.999936	893	1418	0.98 (0.57,1.70)	0.954355	0.999227	517	1418	0.73 (0.35,1.56)	0.418828	0.986454
		rs2762934	GG	899	876	1.00 (ref)	0.685867	0.98779	577	876	1.00 (ref)	0.420586	0.995233	322	876	1.00 (ref)	0.942776	0.998465
			GA	423	432	0.96 (0.81,1.13)			263	432	0.92 (0.76,1.11)			160	432	1.04 (0.83,1.30)
			AA	45	51	0.85 (0.56,1.29)			26	51	0.76 (0.47,1.24)			19	51	0.98 (0.57,1.71)
			Additive*	1367	1359	0.94 (0.82,1.08)	0.408141	0.958231	866	1359	0.90 (0.77,1.06)	0.204667	0.919895	501	1359	1.02 (0.85,1.23)	0.83658	0.9965
			Dominant (GA + AA vs. GG)	1367	1359	0.95 (0.81,1.11)	0.484882	0.922043	866	1359	0.90 (0.75,1.08)	0.276359	0.95596	501	1359	1.03 (0.83,1.28)	0.775844	0.988428
			Recessive (AA vs. GG + GA)	1367	1359	0.87 (0.57,1.31)	0.496457	0.999936	866	1359	0.78 (0.48,1.27)	0.318675	0.99075	501	1359	0.97 (0.56,1.68)	0.914457	0.997105
		rs2762941	GG	562	560	1.00 (ref)	0.910614	0.998205	360	560	1.00 (ref)	0.914634	0.995233	202	560	1.00 (ref)	0.562391	0.998465
			GA	664	664	0.99 (0.85,1.16)			411	664	0.96 (0.80,1.15)			253	664	1.05 (0.85,1.31)
			AA	169	177	0.95 (0.74,1.21)			114	177	0.99 (0.75,1.30)			55	177	0.88 (0.62,1.24)
			Additive*	1395	1401	0.98 (0.88,1.09)	0.713067	0.989375	885	1401	0.98 (0.87,1.12)	0.812647	0.990206	510	1401	0.97 (0.83,1.14)	0.727878	0.992009
			Dominant (GA + AA vs. GG)	1395	1401	0.98 (0.84,1.14)	0.827461	0.98869	885	1401	0.97 (0.81,1.15)	0.708495	0.977938	510	1401	1.02 (0.82,1.26)	0.869152	0.988428
			Recessive (AA vs. GG + GA)	1395	1401	0.95 (0.76,1.19)	0.672672	0.999936	885	1401	1.01 (0.78,1.30)	0.943447	0.999227	510	1401	0.85 (0.61,1.18)	0.335887	0.986454
		rs3787554	GG	1160	1163	1.00 (ref)	0.977162	0.999638	741	1163	1.00 (ref)	0.652959	0.995233	419	1163	1.00 (ref)	0.679598	0.998465
			GA	234	231	1.01 (0.82,1.23)			144	231	0.96 (0.76,1.20)			90	231	1.08 (0.82,1.42)
			AA	14	15	0.93 (0.44,1.94)			6	15	0.66 (0.25,1.72)			8	15	1.39 (0.58,3.34)
			Additive*	1408	1409	1.00 (0.83,1.20)	0.991636	0.999735	891	1409	0.93 (0.75,1.14)	0.47765	0.981487	517	1409	1.10 (0.87,1.40)	0.423526	0.925584
			Dominant (GA + AA vs. GG)	1408	1409	1.00 (0.83,1.22)	0.967294	0.993817	891	1409	0.94 (0.75,1.18)	0.578047	0.966481	517	1409	1.10 (0.84,1.43)	0.496109	0.965378
			Recessive (AA vs. GG + GA)	1408	1409	0.93 (0.44,1.94)	0.844146	0.999936	891	1409	0.66 (0.25,1.73)	0.401522	0.99075	517	1409	1.37 (0.57,3.30)	0.481525	0.997105
		rs4809956	GG	925	908	1.00 (ref)	0.165968	0.887783	582	908	1.00 (ref)	0.644499	0.995233	343	908	1.00 (ref)	0.00361959	0.453388
			GA	388	427	0.89 (0.75,1.05)			255	427	0.92 (0.77,1.12)			133	427	0.82 (0.65,1.04)
			AA	55	43	1.26 (0.83,1.90)			24	43	0.86 (0.52,1.44)			31	43	1.95 (1.19,3.17)
			Additive*	1368	1378	0.97 (0.85,1.11)	0.67266	0.988751	861	1378	0.93 (0.79,1.09)	0.34897	0.960217	507	1378	1.04 (0.87,1.25)	0.66882	0.98063
			Dominant (GA + AA vs. GG)	1368	1378	0.92 (0.79,1.08)	0.318485	0.908669	861	1378	0.92 (0.77,1.10)	0.366428	0.95596	507	1378	0.92 (0.74,1.15)	0.473498	0.965378
			Recessive (AA vs. GG + GA)	1368	1378	1.30 (0.87,1.96)	0.202227	0.958279	861	1378	0.88 (0.53,1.47)	0.63828	0.99075	507	1378	2.06 (1.27,3.34)	0.00342084	0.881208
		rs4809958	AA	1004	1028	1.00 (ref)	0.628594	0.977742	629	1028	1.00 (ref)	0.445892	0.995233	375	1028	1.00 (ref)	0.552226	0.998465
			AC	379	358	1.08 (0.91,1.28)			250	358	1.13 (0.93,1.37)			129	358	0.98 (0.77,1.24)
			CC	33	30	1.14 (0.69,1.89)			19	30	1.02 (0.57,1.84)			14	30	1.43 (0.74,2.77)
			Additive*	1416	1416	1.07 (0.93,1.24)	0.336561	0.921281	898	1416	1.10 (0.93,1.29)	0.280185	0.95727	518	1416	1.04 (0.85,1.27)	0.689569	0.982843
			Dominant (AC + CC vs. AA)	1416	1416	1.08 (0.92,1.28)	0.346251	0.908669	898	1416	1.12 (0.93,1.35)	0.22112	0.954412	518	1416	1.01 (0.81,1.27)	0.921791	0.993355
			Recessive (CC vs. AA + AC)	1416	1416	1.11 (0.67,1.84)	0.67193	0.999936	898	1416	0.99 (0.55,1.77)	0.9603	0.999227	518	1416	1.44 (0.74,2.77)	0.281507	0.986454
		rs4809960	AA	802	865	1.00 (ref)	0.0249558	0.677053	503	865	1.00 (ref)	0.0179147	0.658643	299	865	1.00 (ref)	0.305898	0.975592
			AG	515	447	1.25 (1.06,1.46)			333	447	1.29 (1.07,1.54)			182	447	1.18 (0.95,1.47)
			GG	86	89	1.04 (0.76,1.43)			50	89	0.96 (0.66,1.39)			36	89	1.17 (0.77,1.78)
			Additive*	1403	1401	1.13 (1.00,1.27)	0.0577381	0.847705	886	1401	1.12 (0.98,1.29)	0.103413	0.919895	517	1401	1.13 (0.96,1.33)	0.15679	0.882838
			Dominant (AG + GG vs. AA)	1403	1401	1.21 (1.04,1.41)	0.0127648	0.560589	886	1401	1.23 (1.04,1.47)	0.0173832	0.68848	517	1401	1.18 (0.96,1.45)	0.1238	0.853425
			Recessive (GG vs. AA + AG)	1403	1401	0.96 (0.70,1.31)	0.794699	0.999936	886	1401	0.87 (0.61,1.25)	0.460776	0.99075	517	1401	1.11 (0.74,1.66)	0.627811	0.997105
		rs6068810	CC	1278	1309	1.00 (ref)	0.117094	0.871526	807	1309	1.00 (ref)	0.117971	0.917789	471	1309	1.00 (ref)	0.49681	0.996002
			CA	139	108	1.32 ( 1.020000e+00, 1.720000e+00)			90	108	1.37 ( 1.020000e+00, 1.840000e+00)			49	108	1.24 (0.87,1.78)
			AA	0	4	- (-,-)			0	4	- (-,-)			0	4	- (-,-)
			Additive*	1417	1421	1.22 (0.94,1.57)	0.129383	0.893705	897	1421	1.25 (0.94,1.67)	0.121603	0.919895	520	1421	1.15 (0.81,1.62)	0.436722	0.925584
			Dominant (CA + AA vs. CC)	1417	1421	1.28 (0.98,1.66)	0.0689914	0.876046	897	1421	1.32 (0.98,1.77)	0.0666105	0.895653	520	1421	1.20 (0.84,1.72)	0.318407	0.942545
			Recessive (AA vs. CC + CA)	1417	1421	- (-,-)	0.959522	0.999936	897	1421	- (-,-)	0.960518	0.999227	520	1421	- (-,-)	0.975282	0.997105
		rs6068816	GG	1151	1160	1.00 (ref)	0.875663	0.998205	722	1160	1.00 (ref)	0.797704	0.995233	429	1160	1.00 (ref)	0.871465	0.998465
			GA	257	247	1.04 (0.86,1.27)			168	247	1.08 (0.87,1.34)			89	247	0.98 (0.75,1.29)
			AA	9	10	0.89 (0.36,2.22)			7	10	1.00 (0.37,2.69)			2	10	0.66 (0.14,3.16)
			Additive*	1417	1417	1.03 (0.86,1.23)	0.750392	0.996837	897	1417	1.07 (0.87,1.31)	0.539301	0.981487	520	1417	0.96 (0.75,1.24)	0.776066	0.9965
			Dominant (GA + AA vs. GG)	1417	1417	1.04 (0.86,1.26)	0.6957	0.965622	897	1417	1.08 (0.87,1.33)	0.511215	0.966481	520	1417	0.97 (0.75,1.27)	0.841312	0.988428
			Recessive (AA vs. GG + GA)	1417	1417	0.88 (0.35,2.21)	0.792106	0.999936	897	1417	0.99 (0.37,2.65)	0.981402	0.999227	520	1417	0.67 (0.14,3.17)	0.609703	0.997105
		rs6068821	GG	520	506	1.00 (ref)	0.519171	0.965099	338	506	1.00 (ref)	0.437091	0.995233	182	506	1.00 (ref)	0.400037	0.981696
			GA	636	630	0.98 (0.83,1.15)			390	630	0.91 (0.76,1.10)			246	630	1.11 (0.89,1.40)
			AA	204	225	0.88 (0.70,1.10)			130	225	0.86 (0.66,1.11)			74	225	0.92 (0.67,1.26)
			Additive*	1360	1361	0.94 (0.85,1.05)	0.308489	0.921281	858	1361	0.92 (0.81,1.04)	0.201158	0.919895	502	1361	0.99 (0.85,1.15)	0.88145	0.9965
			Dominant (GA + AA vs. GG)	1360	1361	0.95 (0.81,1.11)	0.530113	0.939842	858	1361	0.90 (0.75,1.07)	0.236464	0.954412	502	1361	1.06 (0.85,1.32)	0.591357	0.983065
			Recessive (AA vs. GG + GA)	1360	1361	0.89 (0.72,1.09)	0.266159	0.976657	858	1361	0.90 (0.71,1.14)	0.382478	0.99075	502	1361	0.86 (0.65,1.15)	0.321374	0.986454
		rs6097801	GG	1038	1017	1.00 (ref)	0.0910678	0.871526	660	1017	1.00 (ref)	0.229033	0.977232	378	1017	1.00 (ref)	0.0136601	0.775433
			GA	296	341	0.85 (0.71,1.01)			187	341	0.84 (0.68,1.03)			109	341	0.86 (0.67,1.10)
			AA	32	23	1.35 (0.78,2.33)			14	23	0.87 (0.44,1.72)			18	23	2.32 (1.22,4.43)
			Additive*	1366	1381	0.93 (0.80,1.08)	0.342631	0.924078	861	1381	0.86 (0.72,1.03)	0.104585	0.919895	505	1381	1.04 (0.85,1.28)	0.709569	0.98734
			Dominant (GA + AA vs. GG)	1366	1381	0.88 (0.74,1.05)	0.144145	0.878304	861	1381	0.84 (0.69,1.03)	0.0867374	0.895653	505	1381	0.94 (0.74,1.20)	0.632503	0.988428
			Recessive (AA vs. GG + GA)	1366	1381	1.40 (0.81,2.42)	0.223642	0.962349	861	1381	0.91 (0.46,1.79)	0.783183	0.994196	505	1381	2.40 (1.26,4.58)	0.00751299	0.939462
		rs6097807	AA	827	809	1.00 (ref)	0.190225	0.903158	535	809	1.00 (ref)	0.0982989	0.880923	292	809	1.00 (ref)	0.151877	0.936337
			AG	447	496	0.88 (0.75,1.03)			269	496	0.82 (0.68,0.98)			178	496	1.00 (0.81,1.25)
			GG	88	78	1.11 (0.80,1.53)			48	78	0.92 (0.63,1.34)			40	78	1.49 (0.99,2.25)
			Additive*	1362	1383	0.96 (0.85,1.09)	0.541637	0.982243	852	1383	0.88 (0.76,1.02)	0.0856275	0.919895	510	1383	1.11 (0.94,1.32)	0.204589	0.882838
			Dominant (AG + GG vs. AA)	1362	1383	0.91 (0.78,1.06)	0.227519	0.908669	852	1383	0.83 (0.69,0.99)	0.0379611	0.805808	510	1383	1.07 (0.87,1.32)	0.534915	0.965378
			Recessive (GG vs. AA + AG)	1362	1383	1.16 (0.85,1.59)	0.35468	0.987136	852	1383	0.98 (0.68,1.43)	0.935299	0.999227	510	1383	1.49 (1.00,2.22)	0.0522272	0.939462
		rs927650	GG	339	370	1.00 (ref)	0.27633	0.940844	211	370	1.00 (ref)	0.0795228	0.858978	128	370	1.00 (ref)	0.315872	0.975592
			GA	654	632	1.13 (0.94,1.36)			400	632	1.14 (0.92,1.41)			254	632	1.15 (0.89,1.47)
			AA	308	286	1.18 (0.95,1.47)			210	286	1.33 (1.04,1.70)			98	286	0.95 (0.69,1.29)
			Additive*	1301	1288	1.09 (0.98,1.22)	0.126912	0.893705	821	1288	1.15 (1.02,1.31)	0.0248868	0.712417	480	1288	0.98 (0.84,1.14)	0.818398	0.9965
			Dominant (GA + AA vs. GG)	1301	1288	1.15 (0.96,1.37)	0.123697	0.876046	821	1288	1.20 (0.98,1.46)	0.0786218	0.895653	480	1288	1.08 (0.85,1.37)	0.518975	0.965378
			Recessive (AA vs. GG + GA)	1301	1288	1.09 (0.91,1.31)	0.348931	0.987136	821	1288	1.22 (1.00,1.50)	0.0547379	0.973242	480	1288	0.87 (0.67,1.12)	0.277986	0.986454
		rs11677711	AA	1283	1289	1.00 (ref)	0.832723	0.998205	808	1289	1.00 (ref)	0.532239	0.995233	475	1289	1.00 (ref)	0.864254	0.998465
			AC	121	112	1.09 (0.83,1.43)			82	112	1.18 (0.87,1.60)			39	112	0.93 (0.63,1.37)
			CC	4	4	1.01 (0.25,4.05)			2	4	0.79 (0.14,4.36)			2	4	1.41 (0.25,7.87)
			Additive*	1408	1405	1.08 (0.83,1.39)	0.570719	0.986819	892	1405	1.14 (0.86,1.52)	0.353314	0.961096	516	1405	0.97 (0.68,1.38)	0.851738	0.9965
			Dominant (AC + CC vs. AA)	1408	1405	1.08 (0.83,1.42)	0.551366	0.939842	892	1405	1.17 (0.87,1.57)	0.306152	0.95596	516	1405	0.95 (0.65,1.38)	0.779863	0.988428
			Recessive (CC vs. AA + AC)	1408	1405	1.00 (0.25,4.02)	0.999936	0.999936	892	1405	0.78 (0.14,4.30)	0.775225	0.99075	516	1405	1.42 (0.26,7.92)	0.687487	0.997105
		rs4674338	GG	471	456	1.00 (ref)	0.242142	0.924945	288	456	1.00 (ref)	0.773958	0.995233	183	456	1.00 (ref)	0.0570307	0.881742
			GA	674	717	0.91 (0.76,1.07)			439	717	0.97 (0.80,1.17)			235	717	0.81 (0.64,1.02)
			AA	243	219	1.07 (0.85,1.34)			149	219	1.06 (0.82,1.37)			94	219	1.11 (0.82,1.50)
			Additive*	1388	1392	1.01 (0.90,1.13)	0.865175	0.997512	876	1392	1.02 (0.90,1.15)	0.79214	0.989598	512	1392	1.01 (0.87,1.17)	0.933629	0.9965
			Dominant (GA + AA vs. GG)	1388	1392	0.94 (0.80,1.11)	0.471924	0.917813	876	1392	0.99 (0.82,1.19)	0.905891	0.985845	512	1392	0.88 (0.71,1.09)	0.249654	0.937637
			Recessive (AA vs. GG + GA)	1388	1392	1.13 (0.93,1.39)	0.222217	0.962349	876	1392	1.08 (0.86,1.36)	0.525178	0.99075	512	1392	1.25 (0.95,1.64)	0.103629	0.939462
		rs647952	AA	1167	1197	1.00 (ref)	0.406629	0.95768	737	1197	1.00 (ref)	0.298866	0.995233	430	1197	1.00 (ref)	0.894978	0.998465
			AG	238	215	1.14 (0.93,1.39)			155	215	1.18 (0.94,1.49)			83	215	1.06 (0.80,1.41)
			GG	9	7	1.33 (0.49,3.60)			6	7	1.44 (0.48,4.35)			3	7	1.15 (0.29,4.55)
			Additive*	1414	1419	1.14 (0.94,1.38)	0.180055	0.916293	898	1419	1.18 (0.96,1.47)	0.120355	0.919895	516	1419	1.07 (0.82,1.39)	0.637998	0.975107
			Dominant (AG + GG vs. AA)	1414	1419	1.14 (0.94,1.40)	0.191484	0.908669	898	1419	1.19 (0.95,1.49)	0.129908	0.91778	516	1419	1.07 (0.81,1.41)	0.646994	0.988428
			Recessive (GG vs. AA + AG)	1414	1419	1.30 (0.48,3.52)	0.603638	0.999936	898	1419	1.40 (0.46,4.22)	0.550017	0.99075	516	1419	1.14 (0.29,4.50)	0.85349	0.997105
		rs7600248	AA	1399	1414	1.00 (ref)	0.220431	0.903575	887	1414	1.00 (ref)	0.382343	0.995233	512	1414	1.00 (ref)	0.975592	0.998465
			AG	1	4	0.25 (0.03,2.28)			1	4	0.37 (0.04,3.39)			0	4	0.00 (0.00, Inf)
			GG	0	0	- (-,-)			0	0	- (-,-)			0	0	- (-,-)
			Additive*	1400	1418	0.25 (0.03,2.28)	0.220431	0.919641	888	1418	0.37 (0.04,3.39)	0.382343	0.961096	512	1418	0.00 (0.00, Inf)	0.975592	0.9965
			Dominant (AG + GG vs. AA)	1400	1418	0.25 (0.03,2.28)	0.220431	0.908669	888	1418	0.37 (0.04,3.39)	0.382343	0.95596	512	1418	0.00 (0.00, Inf)	0.975592	0.998034
			Recessive (GG vs. AA + AG)			- (-,-)	-				- (-,-)	-				- (-,-)	-
		rs7603709	GG	385	367	1.00 (ref)	0.304499	0.945666	233	367	1.00 (ref)	0.864596	0.995233	152	367	1.00 (ref)	0.0485357	0.881742
			GA	698	739	0.90 (0.75,1.08)			457	739	0.98 (0.80,1.21)			241	739	0.77 (0.61,0.99)
			AA	327	303	1.02 (0.83,1.27)			203	303	1.04 (0.82,1.33)			124	303	1.00 (0.75,1.33)
			Additive*	1410	1409	1.01 (0.90,1.12)	0.90845	0.997512	893	1409	1.02 (0.90,1.15)	0.749926	0.986214	517	1409	0.99 (0.85,1.14)	0.870033	0.9965
			Dominant (GA + AA vs. GG)	1410	1409	0.94 (0.79,1.11)	0.438653	0.913548	893	1409	1.00 (0.83,1.22)	0.987927	0.994378	517	1409	0.84 (0.67,1.05)	0.12968	0.864756
			Recessive (AA vs. GG + GA)	1410	1409	1.10 (0.92,1.31)	0.311594	0.985701	893	1409	1.06 (0.86,1.29)	0.605768	0.99075	517	1409	1.18 (0.93,1.50)	0.179815	0.939462
	CYP27B1	rs10877013	GG	683	697	1.00 (ref)	0.867601	0.998205	441	697	1.00 (ref)	0.545755	0.995233	242	697	1.00 (ref)	0.413903	0.981696
			GA	605	593	1.04 (0.89,1.22)			387	593	1.06 (0.88,1.26)			218	593	1.04 (0.83,1.29)
			AA	131	130	1.03 (0.79,1.34)			72	130	0.89 (0.65,1.22)			59	130	1.26 (0.89,1.79)
			Additive*	1419	1420	1.02 (0.91,1.15)	0.676713	0.988751	900	1420	0.99 (0.87,1.13)	0.856374	0.990677	519	1420	1.09 (0.94,1.28)	0.261389	0.895465
			Dominant (GA + AA vs. GG)	1419	1420	1.04 (0.90,1.21)	0.603999	0.963936	900	1420	1.03 (0.87,1.22)	0.770183	0.977938	519	1420	1.08 (0.88,1.32)	0.481608	0.965378
			Recessive (AA vs. GG + GA)	1419	1420	1.01 (0.78,1.30)	0.968431	0.999936	900	1420	0.87 (0.64,1.17)	0.353987	0.99075	519	1420	1.24 (0.89,1.73)	0.196725	0.939462
		rs4646536	AA	677	695	1.00 (ref)	0.928082	0.998914	436	695	1.00 (ref)	0.626354	0.995233	241	695	1.00 (ref)	0.449373	0.990185
			AG	579	576	1.03 (0.88,1.21)			366	576	1.03 (0.86,1.24)			213	576	1.04 (0.84,1.30)
			GG	131	131	1.02 (0.78,1.33)			72	131	0.88 (0.64,1.21)			59	131	1.25 (0.88,1.77)
			Additive*	1387	1402	1.02 (0.91,1.14)	0.761027	0.996837	874	1402	0.98 (0.85,1.12)	0.722592	0.986214	513	1402	1.09 (0.93,1.28)	0.267414	0.895465
			Dominant (AG + GG vs. AA)	1387	1402	1.03 (0.89,1.20)	0.706365	0.96875	874	1402	1.01 (0.85,1.19)	0.953996	0.994194	513	1402	1.08 (0.88,1.33)	0.4628	0.965378
			Recessive (GG vs. AA + AG)	1387	1402	1.00 (0.78,1.30)	0.972166	0.999936	874	1402	0.87 (0.64,1.18)	0.366847	0.99075	513	1402	1.23 (0.88,1.71)	0.22585	0.950635
		rs4646537	AA	1328	1306	1.00 (ref)	0.106216	0.871526	845	1306	1.00 (ref)	0.0433616	0.76586	483	1306	1.00 (ref)	0.75079	0.998465
			AC	87	112	0.76 ( 0.57, 1.02)			50	112	0.70 ( 0.49, 0.98)			37	112	0.86 (0.58,1.27)
			CC	5	2	2.38 ( 0.45,12.57)			5	2	3.33 ( 0.62,17.75)			0	2	0.00 (0.00, Inf)
			Additive*	1420	1420	0.83 (0.63,1.09)	0.173029	0.916293	900	1420	0.81 (0.59,1.11)	0.186123	0.919895	520	1420	0.84 (0.57,1.23)	0.369385	0.925584
			Dominant (AC + CC vs. AA)	1420	1420	0.79 (0.59,1.05)	0.103118	0.876046	900	1420	0.74 (0.53,1.04)	0.0853957	0.895653	520	1420	0.85 (0.57,1.25)	0.406039	0.964065
			Recessive (CC vs. AA + AC)	1420	1420	2.41 ( 0.46,12.77)	0.299601	0.983289	900	1420	3.41 ( 0.64,18.17)	0.151537	0.99075	520	1420	0.00 (0.00, Inf)	0.983007	0.997105
		rs773643	GG	1167	1199	1.00 (ref)	0.47931	0.95768	741	1199	1.00 (ref)	0.57318	0.995233	426	1199	1.00 (ref)	0.685541	0.998465
			GA	228	208	1.13 (0.92,1.39)			145	208	1.13 (0.90,1.43)			83	208	1.12 (0.85,1.49)
			AA	12	11	1.13 (0.49,2.57)			7	11	1.04 (0.40,2.71)			5	11	1.21 (0.41,3.55)
			Additive*	1407	1418	1.12 (0.93,1.35)	0.237923	0.919641	893	1418	1.11 (0.90,1.38)	0.329747	0.95727	514	1418	1.12 (0.87,1.44)	0.385984	0.925584
			Dominant (GA + AA vs. GG)	1407	1418	1.13 (0.93,1.39)	0.22523	0.908669	893	1418	1.13 (0.90,1.42)	0.298511	0.95596	514	1418	1.13 (0.86,1.49)	0.391102	0.962555
			Recessive (AA vs. GG + GA)	1407	1418	1.11 (0.49,2.52)	0.809876	0.999936	893	1418	1.02 (0.39,2.65)	0.972689	0.999227	514	1418	1.19 (0.41,3.48)	0.74959	0.997105
		rs773649	AA	1104	1137	1.00 (ref)	0.364798	0.95768	699	1137	1.00 (ref)	0.354677	0.995233	405	1137	1.00 (ref)	0.659165	0.998465
			AG	271	244	1.15 (0.95,1.39)			171	244	1.17 (0.94,1.45)			100	244	1.12 (0.86,1.46)
			GG	21	22	0.99 (0.54,1.81)			12	22	0.88 (0.43,1.80)			9	22	1.14 (0.52,2.52)
			Additive*	1396	1403	1.10 (0.93,1.31)	0.246233	0.919641	882	1403	1.10 (0.91,1.33)	0.325693	0.95727	514	1403	1.11 (0.88,1.39)	0.374996	0.925584
			Dominant (AG + GG vs. AA)	1396	1403	1.14 (0.94,1.37)	0.181272	0.905918	882	1403	1.14 (0.92,1.41)	0.219571	0.954412	514	1403	1.13 (0.87,1.45)	0.361607	0.95393
			Recessive (GG vs. AA + AG)	1396	1403	0.96 (0.52,1.76)	0.896302	0.999936	882	1403	0.86 (0.42,1.75)	0.673444	0.99075	514	1403	1.11 (0.51,2.46)	0.787676	0.997105
		rs8176345	GG	1416	1418	1.00 (ref)	0.96327	0.999638	897	1418	1.00 (ref)	0.839596	0.995233	519	1418	1.00 (ref)	0.90445	0.998465
			GA	3	3	0.96 (0.19,4.83)			2	3	0.83 (0.14,5.05)			1	3	1.15 ( 0.11,11.60)
			AA	0	0	- (-,-)			0	0	- (-,-)			0	0	- (-,-)
			Additive*	1419	1421	0.96 (0.19,4.83)	0.96327	0.997512	899	1421	0.83 (0.14,5.05)	0.839596	0.990677	520	1421	1.15 ( 0.11,11.60)	0.90445	0.9965
			Dominant (GA + AA vs. GG)	1419	1421	0.96 (0.19,4.83)	0.96327	0.993817	899	1421	0.83 (0.14,5.05)	0.839596	0.978905	520	1421	1.15 ( 0.11,11.60)	0.90445	0.993355
			Recessive (AA vs. GG + GA)			- (-,-)	-				- (-,-)	-				- (-,-)	-
	CYP2R1	rs10766197	GG	361	390	1.00 (ref)	0.546812	0.972276	212	390	1.00 (ref)	0.226132	0.977232	149	390	1.00 (ref)	0.760135	0.998465
			GA	696	680	1.10 (0.92,1.32)			443	680	1.19 (0.96,1.46)			253	680	0.97 (0.76,1.24)
			AA	302	300	1.08 (0.87,1.35)			202	300	1.20 (0.94,1.54)			100	300	0.90 (0.66,1.21)
			Additive*	1359	1370	1.05 (0.94,1.16)	0.424427	0.958231	857	1370	1.10 (0.97,1.24)	0.138846	0.919895	502	1370	0.95 (0.82,1.10)	0.484175	0.954474
			Dominant (GA + AA vs. GG)	1359	1370	1.10 (0.93,1.30)	0.278228	0.908669	857	1370	1.19 (0.98,1.45)	0.0852366	0.895653	502	1370	0.95 (0.75,1.19)	0.651945	0.988428
			Recessive (AA vs. GG + GA)	1359	1370	1.02 (0.85,1.22)	0.855766	0.999936	857	1370	1.07 (0.87,1.32)	0.511457	0.99075	502	1370	0.91 (0.70,1.18)	0.48227	0.997105
		rs10832313	AA	1204	1175	1.00 (ref)	0.214827	0.903158	771	1175	1.00 (ref)	0.133685	0.944644	433	1175	1.00 (ref)	0.820109	0.998465
			AG	192	224	0.83 (0.67,1.03)			113	224	0.78 (0.61,0.99)			79	224	0.93 (0.70,1.23)
			GG	13	15	0.85 (0.40,1.80)			9	15	0.92 (0.40,2.12)			4	15	0.81 (0.26,2.50)
			Additive*	1409	1414	0.85 (0.71,1.03)	0.0912762	0.893705	893	1414	0.82 (0.66,1.02)	0.0685744	0.919895	516	1414	0.92 (0.71,1.19)	0.532371	0.967616
			Dominant (AG + GG vs. AA)	1409	1414	0.83 (0.68,1.02)	0.079585	0.876046	893	1414	0.79 (0.62,1.00)	0.0485184	0.840847	516	1414	0.92 (0.70,1.21)	0.556026	0.973431
			Recessive (GG vs. AA + AG)	1409	1414	0.87 (0.41,1.84)	0.71455	0.999936	893	1414	0.95 (0.41,2.19)	0.899236	0.999227	516	1414	0.82 (0.27,2.52)	0.726786	0.997105
		rs11023371	GG	1205	1232	1.00 (ref)	0.330008	0.945666	771	1232	1.00 (ref)	0.549994	0.995233	434	1232	1.00 (ref)	0.138409	0.921471
		rs11023371	GA	199	174	1.18 (0.95,1.47)			119	174	1.13 (0.88,1.46)			80	174	1.25 (0.94,1.68)
			AA	6	5	1.23 (0.37,4.05)			2	5	0.64 (0.12,3.33)			4	5	2.48 (0.65,9.39)
			Additive*	1410	1411	1.17 (0.95,1.44)	0.139814	0.893705	892	1411	1.10 (0.86,1.40)	0.460282	0.981487	518	1411	1.30 (0.99,1.70)	0.0601795	0.663953
			Dominant (GA + AA vs. GG)	1410	1411	1.18 (0.95,1.47)	0.136874	0.878304	892	1411	1.12 (0.87,1.43)	0.391568	0.95596	518	1411	1.29 (0.97,1.71)	0.0858366	0.811309
			Recessive (AA vs. GG + GA)	1410	1411	1.20 (0.36,3.95)	0.765257	0.999936	892	1411	0.63 (0.12,3.28)	0.582299	0.99075	518	1411	2.40 (0.63,9.08)	0.198287	0.939462
		rs11023374	AA	770	741	1.00 (ref)	0.556297	0.972276	495	741	1.00 (ref)	0.181471	0.977232	275	741	1.00 (ref)	0.864714	0.998465
			AG	518	541	0.92 (0.78,1.08)			314	541	0.86 (0.72,1.03)			204	541	1.02 (0.82,1.26)
			GG	116	110	1.01 (0.76,1.33)			81	110	1.07 (0.79,1.47)			35	110	0.91 (0.60,1.37)
			Additive*	1404	1392	0.97 (0.86,1.09)	0.56373	0.985314	890	1392	0.96 (0.84,1.10)	0.545587	0.981487	514	1392	0.98 (0.83,1.16)	0.820246	0.9965
			Dominant (AG + GG vs. AA)	1404	1392	0.93 (0.80,1.08)	0.368896	0.908669	890	1392	0.90 (0.75,1.06)	0.206181	0.945508	514	1392	1.00 (0.81,1.23)	0.988806	0.998034
			Recessive (GG vs. AA + AG)	1404	1392	1.04 (0.79,1.37)	0.772161	0.999936	890	1392	1.14 (0.84,1.55)	0.387759	0.99075	514	1392	0.90 (0.60,1.34)	0.60389	0.997105
		rs11819875	AA	953	914	1.00 (ref)	0.0905413	0.871526	599	914	1.00 (ref)	0.392322	0.995233	354	914	1.00 (ref)	0.0800829	0.881742
			AC	390	411	0.91 (0.77,1.07)			244	411	0.91 (0.75,1.10)			146	411	0.91 (0.72,1.14)
			CC	39	57	0.65 (0.43,0.99)			29	57	0.77 (0.49,1.23)			10	57	0.47 (0.24,0.93)
			Additive*	1382	1382	0.87 (0.76,1.00)	0.0451431	0.833632	872	1382	0.90 (0.77,1.05)	0.177932	0.919895	510	1382	0.83 (0.68,1.01)	0.0573324	0.663953
			Dominant (AC + CC vs. AA)	1382	1382	0.88 (0.75,1.03)	0.108104	0.876046	872	1382	0.89 (0.75,1.07)	0.233283	0.954412	510	1382	0.85 (0.68,1.07)	0.161786	0.895508
			Recessive (CC vs. AA + AC)	1382	1382	0.67 (0.44,1.02)	0.0603726	0.916218	872	1382	0.79 (0.50,1.26)	0.324489	0.99075	510	1382	0.48 (0.24,0.96)	0.0374619	0.939462
		rs12794714	GG	435	425	1.00 (ref)	0.831133	0.998205	265	425	1.00 (ref)	0.938058	0.995233	170	425	1.00 (ref)	0.509792	0.998465
			GA	660	675	0.95 (0.80,1.13)			415	675	0.97 (0.79,1.18)			245	675	0.90 (0.71,1.14)
			AA	263	270	0.95 (0.76,1.18)			174	270	1.00 (0.78,1.28)			89	270	0.85 (0.62,1.14)
			Additive*	1358	1370	0.97 (0.87,1.08)	0.582536	0.988751	854	1370	1.00 (0.88,1.13)	0.951316	0.993713	504	1370	0.92 (0.79,1.06)	0.251882	0.895465
			Dominant (GA + AA vs. GG)	1358	1370	0.95 (0.81,1.12)	0.545845	0.939842	854	1370	0.98 (0.81,1.18)	0.809995	0.977938	504	1370	0.89 (0.71,1.11)	0.283704	0.942545
			Recessive (AA vs. GG + GA)	1358	1370	0.97 (0.80,1.18)	0.788678	0.999936	854	1370	1.02 (0.82,1.26)	0.86525	0.997721	504	1370	0.90 (0.69,1.18)	0.438824	0.986454
		rs1553006	GG	432	454	1.00 (ref)	0.5704	0.972276	286	454	1.00 (ref)	0.383632	0.995233	146	454	1.00 (ref)	0.125145	0.921471
			GA	690	664	1.10 (0.92,1.30)			446	664	1.09 (0.90,1.32)			244	664	1.12 (0.88,1.42)
			AA	291	287	1.07 (0.86,1.32)			163	287	0.93 (0.73,1.19)			128	287	1.34 (1.01,1.78)
			Additive*	1413	1405	1.04 (0.94,1.15)	0.464896	0.958231	895	1405	0.98 (0.87,1.11)	0.745342	0.986214	518	1405	1.16 (1.00,1.33)	0.0451792	0.663953
			Dominant (GA + AA vs. GG)	1413	1405	1.09 (0.93,1.28)	0.304151	0.908669	895	1405	1.04 (0.87,1.25)	0.663394	0.977938	518	1405	1.19 (0.95,1.48)	0.138422	0.87121
			Recessive (AA vs. GG + GA)	1413	1405	1.01 (0.84,1.21)	0.91603	0.999936	895	1405	0.89 (0.71,1.10)	0.274158	0.99075	518	1405	1.25 (0.98,1.60)	0.0672385	0.939462
		rs1562902	AA	429	448	1.00 (ref)	0.665036	0.98779	284	448	1.00 (ref)	0.471706	0.995233	145	448	1.00 (ref)	0.182236	0.965429
			AG	688	666	1.08 (0.91,1.28)			443	666	1.07 (0.88,1.29)			245	666	1.11 (0.88,1.42)
			GG	291	289	1.05 (0.85,1.30)			165	289	0.93 (0.73,1.19)			126	289	1.31 (0.98,1.74)
			Additive*	1408	1403	1.03 (0.93,1.15)	0.553874	0.982243	892	1403	0.98 (0.87,1.10)	0.692348	0.986214	516	1403	1.14 (0.99,1.32)	0.0681768	0.696149
			Dominant (AG + GG vs. AA)	1408	1403	1.07 (0.91,1.26)	0.386945	0.908669	892	1403	1.03 (0.86,1.23)	0.779633	0.977938	516	1403	1.17 (0.94,1.47)	0.166728	0.895508
			Recessive (GG vs. AA + AG)	1408	1403	1.00 (0.84,1.21)	0.960956	0.999936	892	1403	0.89 (0.72,1.11)	0.302131	0.99075	516	1403	1.22 (0.96,1.56)	0.103858	0.939462
		rs16930609	AA	1155	1146	1.00 (ref)	0.462276	0.95768	722	1146	1.00 (ref)	0.534948	0.995233	433	1146	1.00 (ref)	0.408053	0.981696
			AC	192	199	0.95 (0.77,1.18)			130	199	1.03 (0.81,1.31)			62	199	0.83 (0.61,1.13)
			CC	10	16	0.62 (0.28,1.37)			6	16	0.59 (0.23,1.52)			4	16	0.70 (0.23,2.12)
			Additive*	1357	1361	0.91 (0.75,1.11)	0.353848	0.937443	858	1361	0.96 (0.78,1.20)	0.743226	0.986214	499	1361	0.83 (0.63,1.09)	0.180991	0.882838
			Dominant (AC + CC vs. AA)	1357	1361	0.93 (0.75,1.14)	0.485034	0.922043	858	1361	0.99 (0.78,1.26)	0.954823	0.994194	499	1361	0.82 (0.61,1.10)	0.189869	0.907087
			Recessive (CC vs. AA + AC)	1357	1361	0.62 (0.28,1.38)	0.244852	0.976657	858	1361	0.59 (0.23,1.52)	0.271888	0.99075	499	1361	0.72 (0.24,2.18)	0.556206	0.997105
		rs16930625	AA	1164	1145	1.00 (ref)	0.145758	0.880011	726	1145	1.00 (ref)	0.391841	0.995233	438	1145	1.00 (ref)	0.159669	0.952007
			AG	203	231	0.87 (0.71,1.07)			135	231	0.92 (0.73,1.17)			68	231	0.78 (0.58,1.05)
			GG	11	19	0.57 (0.27,1.20)			7	19	0.58 (0.24,1.39)			4	19	0.57 (0.19,1.71)
			Additive*	1378	1395	0.84 (0.70,1.01)	0.0627928	0.847882	868	1395	0.88 (0.72,1.09)	0.246748	0.954139	510	1395	0.77 (0.59,1.01)	0.0551685	0.663953
			Dominant (AG + GG vs. AA)	1378	1395	0.84 (0.69,1.03)	0.100114	0.876046	868	1395	0.90 (0.71,1.13)	0.349227	0.95596	510	1395	0.76 (0.57,1.02)	0.0641683	0.750475
			Recessive (GG vs. AA + AG)	1378	1395	0.58 (0.27,1.22)	0.151154	0.93822	868	1395	0.59 (0.24,1.41)	0.231581	0.99075	510	1395	0.59 (0.20,1.76)	0.345513	0.986454
		rs1993116	GG	482	523	1.00 (ref)	0.223817	0.908978	323	523	1.00 (ref)	0.786048	0.995233	159	523	1.00 (ref)	0.0403032	0.881742
			GA	659	644	1.12 (0.95,1.32)			412	644	1.05 (0.87,1.27)			247	644	1.25 (0.99,1.58)
			AA	240	219	1.20 (0.96,1.50)			141	219	1.09 (0.84,1.41)			99	219	1.44 (1.07,1.95)
			Additive*	1381	1386	1.10 (0.99,1.22)	0.0871707	0.893705	876	1386	1.04 (0.92,1.18)	0.492524	0.981487	505	1386	1.21 (1.04,1.40)	0.0119085	0.518812
			Dominant (GA + AA vs. GG)	1381	1386	1.14 (0.97,1.33)	0.107416	0.876046	876	1386	1.06 (0.89,1.27)	0.517763	0.966481	505	1386	1.30 (1.04,1.62)	0.0197717	0.629159
			Recessive (AA vs. GG + GA)	1381	1386	1.12 (0.92,1.38)	0.258515	0.976657	876	1386	1.06 (0.83,1.33)	0.653673	0.99075	505	1386	1.26 (0.97,1.65)	0.0853278	0.939462
		rs2060793	GG	506	554	1.00 (ref)	0.150418	0.880011	339	554	1.00 (ref)	0.550428	0.995233	167	554	1.00 (ref)	0.0225348	0.796028
			GA	650	642	1.11 (0.95,1.31)			392	642	1.01 (0.84,1.22)			258	642	1.32 (1.05,1.66)
			AA	232	206	1.24 (0.99,1.55)			141	206	1.15 (0.89,1.49)			91	206	1.43 (1.05,1.95)
			Additive*	1388	1402	1.11 (1.00,1.24)	0.0516232	0.847705	872	1402	1.06 (0.94,1.20)	0.366435	0.961096	516	1402	1.22 (1.05,1.41)	0.00878619	0.499285
			Dominant (GA + AA vs. GG)	1388	1402	1.14 (0.98,1.34)	0.0880235	0.876046	872	1402	1.04 (0.88,1.25)	0.625093	0.971776	516	1402	1.35 (1.08,1.67)	0.00699469	0.41616
			Recessive (AA vs. GG + GA)	1388	1402	1.16 (0.95,1.43)	0.146738	0.93822	872	1402	1.14 (0.90,1.44)	0.278179	0.99075	516	1402	1.22 (0.93,1.61)	0.155905	0.939462
	CYP3A4	rs1851426	GG	1290	1313	1.00 (ref)	0.288416	0.940849	820	1313	1.00 (ref)	0.343035	0.995233	470	1313	1.00 (ref)	0.363783	0.976312
			GA	125	102	1.25 (0.95,1.64)			79	102	1.26 ( 9.20000e-01, 1.71000e+00)			46	102	1.23 ( 0.85, 1.78)
			AA	2	2	1.04 (0.14,7.47)			0	2	0.00 ( 0.00000e+00,1.40837e+190)			2	2	2.52 ( 0.34,18.38)
			Additive*	1417	1417	1.23 (0.94,1.60)	0.126215	0.893705	899	1417	1.21 (0.89,1.63)	0.226505	0.933086	518	1417	1.27 (0.90,1.79)	0.180096	0.882838
			Dominant (GA + AA vs. GG)	1417	1417	1.24 (0.95,1.63)	0.117146	0.876046	899	1417	1.24 (0.91,1.68)	0.178377	0.944491	518	1417	1.26 (0.88,1.81)	0.215694	0.918488
			Recessive (AA vs. GG + GA)	1417	1417	1.02 (0.14,7.36)	0.981643	0.999936	899	1417	0.00 ( 0.000000e+00,1.436182e+190)	0.958199	0.999227	518	1417	2.48 ( 0.34,18.08)	0.371036	0.986454
		rs2242480	GG	1140	1135	1.00 (ref)	0.965561	0.999638	727	1135	1.00 (ref)	0.786167	0.995233	413	1135	1.00 (ref)	0.567357	0.998465
			GA	259	262	0.98 (0.81,1.19)			162	262	0.96 (0.77,1.20)			97	262	1.02 (0.78,1.32)
			AA	12	11	1.08 (0.47,2.47)			5	11	0.71 (0.24,2.07)			7	11	1.69 (0.64,4.42)
			Additive*	1411	1408	0.99 (0.83,1.18)	0.934288	0.997512	894	1408	0.95 (0.77,1.16)	0.599533	0.981941	517	1408	1.07 (0.84,1.35)	0.581959	0.975107
			Dominant (GA + AA vs. GG)	1411	1408	0.99 (0.82,1.19)	0.893718	0.990522	894	1408	0.95 (0.77,1.18)	0.671078	0.977938	517	1408	1.04 (0.81,1.35)	0.741948	0.988428
			Recessive (AA vs. GG + GA)	1411	1408	1.09 (0.48,2.48)	0.841614	0.999936	894	1408	0.72 (0.25,2.08)	0.538885	0.99075	517	1408	1.68 (0.64,4.40)	0.290117	0.986454
		rs2724112	GG	353	380	1.00 (ref)	0.47683	0.95768	217	380	1.00 (ref)	0.466757	0.995233	136	380	1.00 (ref)	0.232981	0.968615
			GA	690	693	1.07 (0.89,1.28)			452	693	1.14 (0.93,1.40)			238	693	0.97 (0.76,1.25)
			AA	302	285	1.15 (0.92,1.43)			179	285	1.11 (0.86,1.43)			123	285	1.21 (0.90,1.63)
			Additive*	1345	1358	1.07 (0.96,1.19)	0.223632	0.919641	848	1358	1.06 (0.93,1.20)	0.372506	0.961096	497	1358	1.10 (0.94,1.27)	0.22567	0.895465
			Dominant (GA + AA vs. GG)	1345	1358	1.09 (0.92,1.30)	0.309726	0.908669	848	1358	1.13 (0.93,1.38)	0.223421	0.954412	497	1358	1.04 (0.82,1.32)	0.737655	0.988428
			Recessive (AA vs. GG + GA)	1345	1358	1.09 (0.91,1.32)	0.338562	0.986088	848	1358	1.02 (0.82,1.26)	0.858455	0.997721	497	1358	1.24 (0.97,1.58)	0.0907592	0.939462
		rs2740574	AA	1290	1314	1.00 (ref)	0.347687	0.955592	818	1314	1.00 (ref)	0.390693	0.995233	472	1314	1.00 (ref)	0.630781	0.998465
			AG	125	105	1.21 (0.92,1.59)			79	105	1.22 ( 0.90, 1.67)			46	105	1.19 ( 0.83, 1.72)
			GG	3	2	1.54 (0.25,9.26)			2	2	1.60 ( 0.22,11.55)			1	2	1.22 ( 0.11,13.71)
			Additive*	1418	1421	1.21 (0.93,1.58)	0.146171	0.893705	899	1421	1.23 (0.92,1.65)	0.170771	0.919895	519	1421	1.19 (0.83,1.69)	0.34095	0.925584
			Dominant (AG + GG vs. AA)	1418	1421	1.22 (0.93,1.59)	0.15225	0.894985	899	1421	1.23 (0.91,1.67)	0.178492	0.944491	519	1421	1.19 (0.83,1.72)	0.33714	0.944105
			Recessive (GG vs. AA + AG)	1418	1421	1.51 (0.25,9.11)	0.652792	0.999936	899	1421	1.58 ( 0.22,11.36)	0.651637	0.99075	519	1421	1.20 ( 0.11,13.52)	0.8806	0.997105
		rs4646437	GG	1115	1099	1.00 (ref)	0.558875	0.972276	712	1099	1.00 (ref)	0.649866	0.995233	403	1099	1.00 (ref)	0.261164	0.968615
			GA	278	298	0.92 (0.76,1.10)			176	298	0.91 (0.74,1.13)			102	298	0.92 (0.72,1.19)
			AA	16	13	1.22 (0.58,2.57)			7	13	0.83 (0.33,2.11)			9	13	1.93 (0.81,4.61)
			Additive*	1409	1410	0.95 (0.80,1.13)	0.558302	0.982766	895	1410	0.91 (0.75,1.11)	0.35319	0.961096	514	1410	1.01 (0.81,1.27)	0.902808	0.9965
			Dominant (GA + AA vs. GG)	1409	1410	0.93 (0.78,1.12)	0.438888	0.913548	895	1410	0.91 (0.74,1.12)	0.363334	0.95596	514	1410	0.97 (0.75,1.24)	0.789599	0.988428
			Recessive (AA vs. GG + GA)	1409	1410	1.25 (0.60,2.61)	0.558908	0.999936	895	1410	0.85 (0.33,2.14)	0.725127	0.99075	514	1410	1.96 (0.83,4.68)	0.126955	0.939462
		rs4986910	AA	1412	1407	1.00 (ref)	0.370152	0.95768	893	1407	1.00 (ref)	0.652809	0.995233	519	1407	1.00 (ref)	0.432055	0.981696
			AG	6	12	0.49 ( 0.18, 1.32)			5	12	0.62 ( 0.22, 1.78)			1	12	0.26 (0.03,2.00)
			GG	1	1	1.02 ( 0.06,16.47)			1	1	1.43 ( 0.09,23.01)			0	1	0.00 (0.00, Inf)
			Additive*	1419	1420	0.62 (0.27,1.39)	0.244248	0.919641	899	1420	0.78 (0.33,1.80)	0.55649	0.981487	520	1420	0.25 (0.03,1.85)	0.174299	0.882838
			Dominant (AG + GG vs. AA)	1419	1420	0.53 (0.21,1.34)	0.181323	0.905918	899	1420	0.69 (0.26,1.82)	0.447717	0.96403	520	1420	0.24 (0.03,1.86)	0.17164	0.895508
			Recessive (GG vs. AA + AG)	1419	1420	1.03 ( 0.06,16.60)	0.98195	0.999936	899	1420	1.44 ( 0.09,23.13)	0.798088	0.995754	520	1420	0.00 (0.00, Inf)	0.987999	0.997105
		rs6964587	CC	503	511	1.00 (ref)	0.0633891	0.871526	319	511	1.00 (ref)	0.101053	0.880923	184	511	1.00 (ref)	0.19372	0.968037
			CA	649	680	0.97 (0.82,1.14)			407	680	0.96 (0.79,1.15)			242	680	0.99 (0.79,1.24)
			AA	230	188	1.26 (1.00,1.58)			148	188	1.26 (0.97,1.63)			82	188	1.30 (0.95,1.78)
			Additive*	1382	1379	1.08 (0.97,1.21)	0.147482	0.893705	874	1379	1.08 (0.96,1.23)	0.213709	0.919895	508	1379	1.10 (0.95,1.29)	0.203487	0.882838
			Dominant (CA + AA vs. CC)	1382	1379	1.03 (0.88,1.20)	0.729054	0.970342	874	1379	1.02 (0.85,1.22)	0.822741	0.977938	508	1379	1.05 (0.85,1.31)	0.631314	0.988428
			Recessive (AA vs. CC + CA)	1382	1379	1.28 (1.04,1.58)	0.0207851	0.89806	874	1379	1.29 (1.02,1.63)	0.0367099	0.876958	508	1379	1.31 (0.98,1.74)	0.070261	0.939462
	DHCR7	rs1044482	AA	680	680	1.00 (ref)	0.871907	0.998205	428	680	1.00 (ref)	0.794676	0.995233	252	680	1.00 (ref)	0.857098	0.998465
			AG	597	609	0.98 (0.84,1.15)			378	609	1.00 (0.84,1.20)			219	609	0.94 (0.76,1.17)
			GG	134	127	1.05 (0.81,1.38)			87	127	1.11 (0.82,1.50)			47	127	0.97 (0.67,1.41)
			Additive*	1411	1416	1.01 (0.90,1.13)	0.88724	0.997512	893	1416	1.03 (0.91,1.18)	0.625635	0.984164	518	1416	0.97 (0.83,1.14)	0.69124	0.983368
			Dominant (AG + GG vs. AA)	1411	1416	0.99 (0.86,1.15)	0.930294	0.993817	893	1416	1.02 (0.86,1.21)	0.811492	0.977938	518	1416	0.95 (0.77,1.16)	0.599871	0.986204
			Recessive (GG vs. AA + AG)	1411	1416	1.06 (0.82,1.37)	0.640891	0.999936	893	1416	1.11 (0.83,1.48)	0.498554	0.99075	518	1416	1.00 (0.70,1.43)	0.986526	0.997105
		rs12785878	AA	700	701	1.00 (ref)	0.702619	0.98779	437	701	1.00 (ref)	0.561769	0.995233	263	701	1.00 (ref)	0.725778	0.998465
			AC	583	592	0.99 (0.84,1.15)			373	592	1.02 (0.85,1.22)			210	592	0.92 (0.74,1.14)
			CC	134	121	1.11 (0.85,1.45)			88	121	1.18 (0.87,1.60)			46	121	0.99 (0.68,1.44)
			Additive*	1417	1414	1.03 (0.91,1.15)	0.666323	0.988751	898	1414	1.06 (0.93,1.21)	0.375412	0.961096	519	1414	0.96 (0.82,1.13)	0.640829	0.975107
			Dominant (AC + CC vs. AA)	1417	1414	1.01 (0.87,1.17)	0.93253	0.993817	898	1414	1.05 (0.88,1.24)	0.586759	0.966481	519	1414	0.93 (0.76,1.14)	0.486199	0.965378
			Recessive (CC vs. AA + AC)	1417	1414	1.12 (0.86,1.45)	0.410767	0.999936	898	1414	1.17 (0.87,1.57)	0.295593	0.99075	519	1414	1.03 (0.72,1.48)	0.867275	0.997105
		rs12800438	AA	681	687	1.00 (ref)	0.754847	0.995817	422	687	1.00 (ref)	0.614877	0.995233	259	687	1.00 (ref)	0.583713	0.998465
			AG	572	588	0.98 (0.84,1.15)			370	588	1.03 (0.86,1.24)			202	588	0.89 (0.72,1.11)
			GG	133	123	1.09 (0.83,1.43)			87	123	1.17 (0.86,1.58)			46	123	0.98 (0.67,1.42)
			Additive*	1386	1398	1.02 (0.91,1.14)	0.754009	0.996837	879	1398	1.06 (0.93,1.21)	0.372722	0.961096	507	1398	0.95 (0.81,1.11)	0.51985	0.967616
			Dominant (AG + GG vs. AA)	1386	1398	1.00 (0.86,1.16)	0.99417	0.997221	879	1398	1.06 (0.89,1.26)	0.532655	0.966481	507	1398	0.91 (0.74,1.12)	0.354022	0.95393
			Recessive (GG vs. AA + AG)	1386	1398	1.10 (0.85,1.42)	0.476049	0.999936	879	1398	1.15 (0.86,1.54)	0.360609	0.99075	507	1398	1.03 (0.72,1.48)	0.870134	0.997105
		rs1790349	AA	935	939	1.00 (ref)	0.980387	0.999638	586	939	1.00 (ref)	0.689483	0.995233	349	939	1.00 (ref)	0.682008	0.998465
			AG	427	425	1.01 (0.86,1.19)			279	425	1.07 (0.89,1.29)			148	425	0.91 (0.73,1.15)
			GG	53	55	0.98 (0.66,1.45)			31	55	0.93 (0.59,1.47)			22	55	1.08 (0.64,1.82)
			Additive*	1415	1419	1.00 (0.88,1.15)	0.965306	0.997512	896	1419	1.03 (0.88,1.20)	0.710662	0.986214	519	1419	0.96 (0.80,1.16)	0.693842	0.983953
			Dominant (AG + GG vs. AA)	1415	1419	1.01 (0.86,1.18)	0.916055	0.992253	896	1419	1.06 (0.88,1.26)	0.54409	0.966481	519	1419	0.93 (0.75,1.16)	0.527067	0.965378
			Recessive (GG vs. AA + AG)	1415	1419	0.97 (0.66,1.44)	0.893625	0.999936	896	1419	0.91 (0.57,1.43)	0.667385	0.99075	519	1419	1.11 (0.66,1.86)	0.687337	0.997105
		rs1792272	AA	1315	1314	1.00 (ref)	0.820212	0.998205	828	1314	1.00 (ref)	0.700084	0.995233	487	1314	1.00 (ref)	0.243839	0.968615
			AG	78	85	0.92 (0.67,1.26)			55	85	1.09 (0.76,1.55)			23	85	0.68 (0.42,1.09)
			GG	6	5	1.23 (0.37,4.05)			5	5	1.59 (0.45,5.55)			1	5	0.56 (0.06,4.86)
			Additive*	1399	1404	0.96 (0.72,1.27)	0.758868	0.996837	888	1404	1.12 (0.82,1.54)	0.460367	0.981487	511	1404	0.69 (0.44,1.07)	0.0955177	0.79963
			Dominant (AG + GG vs. AA)	1399	1404	0.93 (0.69,1.27)	0.670264	0.965622	888	1404	1.11 (0.79,1.57)	0.536613	0.966481	511	1404	0.67 (0.42,1.07)	0.094161	0.825899
			Recessive (GG vs. AA + AG)	1399	1404	1.23 (0.37,4.07)	0.730531	0.999936	888	1404	1.58 (0.45,5.53)	0.474584	0.99075	511	1404	0.57 (0.06,4.95)	0.606129	0.997105
		rs2002064	AA	814	819	1.00 (ref)	0.786899	0.998205	512	819	1.00 (ref)	0.67445	0.995233	302	819	1.00 (ref)	0.962162	0.998465
			AG	510	494	1.04 (0.89,1.22)			328	494	1.07 (0.89,1.28)			182	494	0.98 (0.78,1.22)
			GG	81	87	0.93 (0.68,1.29)			50	87	0.93 (0.64,1.35)			31	87	0.95 (0.61,1.48)
			Additive*	1405	1400	1.00 (0.89,1.13)	0.973549	0.99756	890	1400	1.02 (0.88,1.17)	0.827397	0.990206	515	1400	0.98 (0.82,1.16)	0.78122	0.9965
			Dominant (AG + GG vs. AA)	1405	1400	1.02 (0.88,1.19)	0.772075	0.983531	890	1400	1.05 (0.88,1.25)	0.60022	0.966481	515	1400	0.97 (0.79,1.20)	0.798005	0.988428
			Recessive (GG vs. AA + AG)	1405	1400	0.92 (0.67,1.26)	0.605843	0.999936	890	1400	0.91 (0.63,1.30)	0.594535	0.99075	515	1400	0.96 (0.63,1.48)	0.85721	0.997105
		rs3794060	AA	701	702	1.00 (ref)	0.923535	0.998914	439	702	1.00 (ref)	0.808826	0.995233	262	702	1.00 (ref)	0.838086	0.998465
			AG	565	574	0.99 (0.84,1.16)			358	574	1.01 (0.85,1.21)			207	574	0.94 (0.75,1.17)
			GG	121	116	1.05 (0.79,1.38)			79	116	1.11 (0.81,1.52)			42	116	0.95 (0.64,1.40)
			Additive*	1387	1392	1.01 (0.90,1.13)	0.888813	0.997512	876	1392	1.04 (0.91,1.19)	0.594705	0.981941	511	1392	0.96 (0.81,1.13)	0.607002	0.975107
			Dominant (AG + GG vs. AA)	1387	1392	1.00 (0.86,1.16)	0.97703	0.993817	876	1392	1.03 (0.87,1.22)	0.744801	0.977938	511	1392	0.94 (0.76,1.16)	0.554144	0.973284
			Recessive (GG vs. AA + AG)	1387	1392	1.05 (0.80,1.38)	0.710545	0.999936	876	1392	1.10 (0.81,1.50)	0.525229	0.99075	511	1392	0.98 (0.67,1.42)	0.903342	0.997105
		rs4944957	GG	698	700	1.00 (ref)	0.494932	0.95768	436	700	1.00 (ref)	0.434774	0.995233	262	700	1.00 (ref)	0.639482	0.998465
			GA	570	594	0.96 (0.82,1.13)			362	594	0.99 (0.83,1.19)			208	594	0.91 (0.73,1.13)
			AA	133	118	1.14 (0.86,1.49)			87	118	1.21 (0.89,1.65)			46	118	1.02 (0.70,1.49)
			Additive*	1401	1412	1.02 (0.91,1.15)	0.7048	0.989375	885	1412	1.06 (0.93,1.21)	0.417711	0.961096	516	1412	0.97 (0.82,1.14)	0.679177	0.980927
			Dominant (GA + AA vs. GG)	1401	1412	0.99 (0.85,1.15)	0.89504	0.990522	885	1412	1.03 (0.86,1.22)	0.75889	0.977938	516	1412	0.93 (0.75,1.14)	0.464737	0.965378
			Recessive (AA vs. GG + GA)	1401	1412	1.16 (0.89,1.50)	0.278281	0.979605	885	1412	1.21 (0.90,1.63)	0.197632	0.99075	516	1412	1.07 (0.74,1.53)	0.723772	0.997105
		rs4945008	GG	673	661	1.00 (ref)	0.557141	0.972276	421	661	1.00 (ref)	0.554909	0.995233	252	661	1.00 (ref)	0.577662	0.998465
			GA	562	587	0.94 (0.80,1.10)			355	587	0.96 (0.80,1.16)			207	587	0.89 (0.71,1.11)
			AA	139	127	1.08 (0.82,1.41)			90	127	1.14 (0.84,1.54)			49	127	0.98 (0.68,1.41)
			Additive*	1374	1375	1.00 (0.89,1.12)	0.996483	0.999735	866	1375	1.03 (0.90,1.17)	0.680489	0.986214	508	1375	0.95 (0.81,1.11)	0.523541	0.967616
			Dominant (GA + AA vs. GG)	1374	1375	0.96 (0.83,1.12)	0.642924	0.965622	866	1375	0.99 (0.84,1.18)	0.948239	0.993897	508	1375	0.91 (0.73,1.12)	0.350522	0.95393
			Recessive (AA vs. GG + GA)	1374	1375	1.11 (0.86,1.43)	0.430752	0.999936	866	1375	1.16 (0.87,1.55)	0.310774	0.99075	508	1375	1.03 (0.72,1.47)	0.865333	0.997105
		rs7944926	GG	701	702	1.00 (ref)	0.805651	0.998205	438	702	1.00 (ref)	0.684261	0.995233	263	702	1.00 (ref)	0.827371	0.998465
			GA	557	564	0.99 (0.85,1.16)			353	564	1.02 (0.85,1.22)			204	564	0.93 (0.75,1.16)
			AA	129	119	1.09 (0.83,1.43)			84	119	1.15 (0.84,1.57)			45	119	0.99 (0.68,1.45)
			Additive*	1387	1385	1.02 (0.91,1.15)	0.712572	0.989375	875	1385	1.05 (0.92,1.20)	0.461828	0.981487	512	1385	0.97 (0.83,1.14)	0.716879	0.988356
			Dominant (GA + AA vs. GG)	1387	1385	1.01 (0.87,1.17)	0.916501	0.992253	875	1385	1.04 (0.88,1.24)	0.638581	0.975057	512	1385	0.94 (0.77,1.16)	0.591078	0.983065
			Recessive (AA vs. GG + GA)	1387	1385	1.09 (0.84,1.42)	0.515825	0.999936	875	1385	1.14 (0.84,1.53)	0.399965	0.99075	512	1385	1.02 (0.71,1.47)	0.903288	0.997105
		rs909217	AA	1163	1193	1.00 (ref)	0.861115	0.998205	724	1193	1.00 (ref)	0.382765	0.995233	439	1193	1.00 (ref)	0.406364	0.981696
			AG	102	103	1.03 (0.77,1.37)			70	103	1.15 (0.84,1.59)			32	103	0.84 (0.55,1.27)
			GG	0	0	- (-,-)			0	0	- (-,-)			0	0	- (-,-)
			Additive*	1265	1296	1.03 (0.77,1.37)	0.861115	0.997512	794	1296	1.15 (0.84,1.59)	0.382765	0.961096	471	1296	0.84 (0.55,1.27)	0.406364	0.925584
			Dominant (AG + GG vs. AA)	1265	1296	1.03 (0.77,1.37)	0.861115	0.990522	794	1296	1.15 (0.84,1.59)	0.382765	0.95596	471	1296	0.84 (0.55,1.27)	0.406364	0.964065
			Recessive (GG vs. AA + AG)			- (-,-)	-				- (-,-)	-				- (-,-)	-
		rs949177	GG	1271	1262	1.00 (ref)	0.964679	0.999638	798	1262	1.00 (ref)	0.752256	0.995233	473	1262	1.00 (ref)	0.490615	0.996002
			GA	142	141	1.00 (0.78,1.28)			98	141	1.11 (0.84,1.46)			44	141	0.81 (0.57,1.16)
			AA	6	7	0.86 (0.29,2.58)			4	7	0.91 (0.26,3.13)			2	7	0.72 (0.15,3.53)
			Additive*	1419	1410	0.98 (0.78,1.24)	0.887616	0.997512	900	1410	1.08 (0.84,1.39)	0.544873	0.981487	519	1410	0.82 (0.59,1.14)	0.234951	0.895465
			Dominant (GA + AA vs. GG)	1419	1410	0.99 (0.78,1.26)	0.926863	0.993817	900	1410	1.10 (0.84,1.44)	0.493377	0.966481	519	1410	0.81 (0.57,1.15)	0.235753	0.926377
			Recessive (AA vs. GG + GA)	1419	1410	0.86 (0.29,2.58)	0.790792	0.999936	900	1410	0.90 (0.26,3.10)	0.862959	0.997721	519	1410	0.73 (0.15,3.59)	0.702256	0.997105
	GC	rs1155563	AA	694	694	1.00 (ref)	0.79197	0.998205	441	694	1.00 (ref)	0.988663	0.99898	253	694	1.00 (ref)	0.409435	0.981696
			AG	548	546	1.00 (0.86,1.18)			347	546	1.00 (0.83,1.20)			201	546	1.00 (0.80,1.24)
			GG	119	108	1.10 (0.83,1.46)			71	108	1.02 (0.74,1.42)			48	108	1.28 (0.88,1.86)
			Additive*	1361	1348	1.03 (0.92,1.16)	0.626698	0.988751	859	1348	1.01 (0.88,1.15)	0.933609	0.993713	502	1348	1.08 (0.92,1.26)	0.372237	0.925584
			Dominant (AG + GG vs. AA)	1361	1348	1.02 (0.88,1.19)	0.804576	0.986969	859	1348	1.00 (0.84,1.19)	0.980132	0.994378	502	1348	1.04 (0.85,1.28)	0.682778	0.988428
			Recessive (GG vs. AA + AG)	1361	1348	1.10 (0.84,1.45)	0.495281	0.999936	859	1348	1.02 (0.75,1.41)	0.881209	0.997721	502	1348	1.28 (0.89,1.84)	0.181425	0.939462
		rs12512631	AA	575	604	1.00 (ref)	0.395123	0.95768	364	604	1.00 (ref)	0.406791	0.995233	211	604	1.00 (ref)	0.67916	0.998465
			AG	633	600	1.11 (0.95,1.31)			404	600	1.12 (0.93,1.35)			229	600	1.11 (0.88,1.38)
			GG	165	171	1.01 (0.80,1.30)			101	171	0.99 (0.75,1.31)			64	171	1.06 (0.76,1.47)
			Additive*	1373	1375	1.04 (0.93,1.16)	0.507656	0.966021	869	1375	1.03 (0.91,1.17)	0.636444	0.984432	504	1375	1.05 (0.90,1.22)	0.538509	0.967616
			Dominant (AG + GG vs. AA)	1373	1375	1.09 (0.94,1.27)	0.256431	0.908669	869	1375	1.09 (0.92,1.30)	0.320187	0.95596	504	1375	1.09 (0.89,1.35)	0.403312	0.964065
			Recessive (GG vs. AA + AG)	1373	1375	0.96 (0.76,1.21)	0.730019	0.999936	869	1375	0.93 (0.71,1.21)	0.595278	0.99075	504	1375	1.00 (0.73,1.37)	0.985241	0.997105
		rs1352844	GG	1070	1063	1.00 (ref)	0.335485	0.945666	680	1063	1.00 (ref)	0.503685	0.995233	390	1063	1.00 (ref)	0.501301	0.997765
			GA	308	304	1.01 (0.84,1.20)			190	304	0.98 (0.80,1.21)			118	304	1.04 (0.81,1.32)
			AA	18	28	0.64 (0.35,1.16)			11	28	0.66 (0.32,1.33)			7	28	0.62 (0.27,1.44)
			Additive*	1396	1395	0.95 (0.81,1.11)	0.504883	0.966021	881	1395	0.93 (0.78,1.12)	0.465727	0.981487	515	1395	0.96 (0.78,1.19)	0.736243	0.994061
			Dominant (GA + AA vs. GG)	1396	1395	0.97 (0.82,1.16)	0.770536	0.983531	881	1395	0.95 (0.78,1.17)	0.648622	0.977938	515	1395	1.00 (0.79,1.27)	0.992427	0.998297
			Recessive (AA vs. GG + GA)	1396	1395	0.64 (0.35,1.16)	0.139684	0.93822	881	1395	0.66 (0.32,1.34)	0.247735	0.99075	515	1395	0.61 (0.26,1.42)	0.253842	0.953598
		rs1352846	AA	584	625	1.00 (ref)	0.564467	0.972276	367	625	1.00 (ref)	0.843011	0.995233	217	625	1.00 (ref)	0.420402	0.981696
			AG	494	500	1.07 (0.90,1.27)			303	500	1.04 (0.85,1.26)			191	500	1.13 (0.89,1.42)
			GG	133	127	1.13 (0.86,1.49)			82	127	1.09 (0.80,1.49)			51	127	1.23 (0.85,1.78)
			Additive*	1211	1252	1.07 (0.95,1.20)	0.285846	0.921281	752	1252	1.04 (0.91,1.19)	0.561463	0.981487	459	1252	1.11 (0.95,1.31)	0.189172	0.882838
			Dominant (AG + GG vs. AA)	1211	1252	1.08 (0.92,1.27)	0.320922	0.908669	752	1252	1.05 (0.87,1.26)	0.62004	0.97053	459	1252	1.15 (0.92,1.43)	0.219372	0.918488
			Recessive (GG vs. AA + AG)	1211	1252	1.10 (0.85,1.43)	0.476357	0.999936	752	1252	1.07 (0.80,1.44)	0.645895	0.99075	459	1252	1.17 (0.82,1.66)	0.390398	0.986454
		rs1491711	GG	576	600	1.00 (ref)	0.444237	0.95768	364	600	1.00 (ref)	0.433855	0.995233	212	600	1.00 (ref)	0.745377	0.998465
			GC	672	638	1.10 (0.94,1.29)			430	638	1.11 (0.93,1.33)			242	638	1.09 (0.87,1.36)
			CC	166	173	1.00 (0.78,1.27)			102	173	0.98 (0.74,1.29)			64	173	1.03 (0.74,1.44)
			Additive*	1414	1411	1.03 (0.92,1.15)	0.601759	0.988751	896	1411	1.03 (0.90,1.16)	0.69747	0.986214	518	1411	1.04 (0.89,1.21)	0.636527	0.975107
			Dominant (GC + CC vs. GG)	1414	1411	1.08 (0.93,1.26)	0.317811	0.908669	896	1411	1.08 (0.91,1.29)	0.361624	0.95596	518	1411	1.08 (0.87,1.33)	0.484913	0.965378
			Recessive (CC vs. GG + GC)	1414	1411	0.95 (0.76,1.19)	0.661327	0.999936	896	1411	0.92 (0.71,1.20)	0.557162	0.99075	518	1411	0.99 (0.72,1.35)	0.940075	0.997105
		rs16846876	AA	625	613	1.00 (ref)	0.34535	0.955592	389	613	1.00 (ref)	0.505316	0.995233	236	613	1.00 (ref)	0.421974	0.981696
			AT	587	613	0.94 (0.80,1.10)			374	613	0.96 (0.80,1.15)			213	613	0.91 (0.73,1.13)
			TT	169	148	1.12 (0.88,1.44)			106	148	1.14 (0.86,1.51)			63	148	1.12 (0.80,1.57)
			Additive*	1381	1374	1.02 (0.91,1.14)	0.742125	0.996837	869	1374	1.03 (0.91,1.17)	0.645163	0.984432	512	1374	1.01 (0.86,1.18)	0.909432	0.9965
			Dominant (AT + TT vs. AA)	1381	1374	0.97 (0.84,1.13)	0.730119	0.970342	869	1374	0.99 (0.84,1.18)	0.943144	0.990908	512	1374	0.95 (0.77,1.17)	0.628068	0.988428
			Recessive (TT vs. AA + AT)	1381	1374	1.16 (0.92,1.47)	0.219316	0.962349	869	1374	1.16 (0.89,1.52)	0.279346	0.99075	512	1374	1.18 (0.86,1.62)	0.315559	0.986454
		rs17383291	AA	1259	1241	1.00 (ref)	0.517212	0.965099	799	1241	1.00 (ref)	0.494656	0.995233	460	1241	1.00 (ref)	0.81097	0.998465
			AC	153	167	0.90 (0.71,1.14)			96	167	0.88 (0.68,1.16)			57	167	0.92 (0.66,1.27)
			CC	8	11	0.70 (0.28,1.75)			5	11	0.64 (0.22,1.88)			3	11	0.77 (0.21,2.82)
			Additive*	1420	1419	0.89 (0.72,1.10)	0.265413	0.920347	900	1419	0.87 (0.68,1.11)	0.250639	0.954353	520	1419	0.91 (0.68,1.22)	0.522754	0.967616
			Dominant (AC + CC vs. AA)	1420	1419	0.89 (0.71,1.12)	0.30768	0.908669	900	1419	0.87 (0.67,1.13)	0.294801	0.95596	520	1419	0.91 (0.66,1.25)	0.549854	0.972148
			Recessive (CC vs. AA + AC)	1420	1419	0.71 (0.28,1.77)	0.459167	0.999936	900	1419	0.65 (0.22,1.90)	0.434566	0.99075	520	1419	0.78 (0.21,2.85)	0.708182	0.997105
		rs17467825	AA	682	691	1.00 (ref)	0.454274	0.95768	439	691	1.00 (ref)	0.757176	0.995233	243	691	1.00 (ref)	0.255175	0.968615
			AG	482	506	0.97 (0.82,1.14)			303	506	0.96 (0.79,1.15)			179	506	0.99 (0.79,1.24)
			GG	118	102	1.17 (0.88,1.56)			71	102	1.08 (0.78,1.50)			47	102	1.36 (0.93,1.99)
			Additive*	1282	1299	1.03 (0.92,1.16)	0.595756	0.988751	813	1299	1.00 (0.87,1.15)	0.95754	0.993713	469	1299	1.09 (0.93,1.29)	0.289275	0.906673
			Dominant (AG + GG vs. AA)	1282	1299	1.00 (0.86,1.17)	0.984073	0.99396	813	1299	0.98 (0.82,1.17)	0.800892	0.977938	469	1299	1.05 (0.85,1.30)	0.652704	0.988428
			Recessive (GG vs. AA + AG)	1282	1299	1.19 (0.90,1.57)	0.232919	0.975397	813	1299	1.10 (0.80,1.51)	0.559916	0.99075	469	1299	1.37 (0.94,1.98)	0.0988249	0.939462
		rs188812	AA	1138	1118	1.00 (ref)	0.785743	0.998205	715	1118	1.00 (ref)	0.993002	0.999318	423	1118	1.00 (ref)	0.435912	0.983784
			AT	257	265	0.95 (0.79,1.15)			166	265	0.99 (0.79,1.23)			91	265	0.88 (0.67,1.15)
			TT	20	23	0.85 (0.46,1.57)			14	23	0.99 (0.50,1.95)			6	23	0.65 (0.26,1.63)
			Additive*	1415	1406	0.94 (0.80,1.12)	0.500361	0.963385	895	1406	0.99 (0.82,1.19)	0.909222	0.993606	520	1406	0.86 (0.68,1.09)	0.20804	0.882838
			Dominant (AT + TT vs. AA)	1415	1406	0.94 (0.78,1.14)	0.54527	0.939842	895	1406	0.99 (0.80,1.22)	0.905664	0.985845	520	1406	0.86 (0.66,1.11)	0.255289	0.94168
			Recessive (TT vs. AA + AT)	1415	1406	0.86 (0.47,1.58)	0.630912	0.999936	895	1406	0.99 (0.50,1.95)	0.976533	0.999227	520	1406	0.67 (0.27,1.66)	0.385249	0.986454
		rs2070741	AA	1223	1241	1.00 (ref)	0.361415	0.956214	775	1241	1.00 (ref)	0.528135	0.995233	448	1241	1.00 (ref)	0.341658	0.975592
			AC	190	166	1.16 (0.93,1.45)			120	166	1.16 (0.90,1.49)			70	166	1.20 (0.88,1.62)
			CC	5	7	0.73 (0.23,2.33)			4	7	0.92 (0.27,3.18)			1	7	0.38 (0.05,3.18)
			Additive*	1418	1414	1.12 (0.91,1.38)	0.299334	0.921281	899	1414	1.13 (0.89,1.43)	0.325645	0.95727	519	1414	1.12 (0.84,1.49)	0.451479	0.925584
			Dominant (AC + CC vs. AA)	1418	1414	1.14 (0.92,1.43)	0.230558	0.908669	899	1414	1.15 (0.89,1.47)	0.283833	0.95596	519	1414	1.16 (0.86,1.57)	0.330059	0.942545
			Recessive (CC vs. AA + AC)	1418	1414	0.72 (0.23,2.28)	0.574301	0.999936	899	1414	0.90 (0.26,3.12)	0.870894	0.997721	519	1414	0.38 (0.05,3.11)	0.364805	0.986454
		rs222020	AA	1008	1036	1.00 (ref)	0.32967	0.945666	634	1036	1.00 (ref)	0.350642	0.995233	374	1036	1.00 (ref)	0.693905	0.998465
			AG	369	342	1.11 (0.93,1.32)			236	342	1.13 (0.93,1.37)			133	342	1.08 (0.85,1.36)
			GG	32	40	0.82 (0.51,1.32)			20	40	0.83 (0.48,1.44)			12	40	0.83 (0.43,1.61)
			Additive*	1409	1418	1.04 (0.90,1.20)	0.618519	0.988751	890	1418	1.05 (0.89,1.24)	0.550509	0.981487	519	1418	1.02 (0.84,1.24)	0.860248	0.9965
			Dominant (AG + GG vs. AA)	1409	1418	1.08 (0.91,1.27)	0.371501	0.908669	890	1418	1.10 (0.91,1.33)	0.334696	0.95596	519	1418	1.05 (0.84,1.32)	0.673595	0.988428
			Recessive (GG vs. AA + AG)	1409	1418	0.80 (0.50,1.29)	0.359589	0.990018	890	1418	0.80 (0.46,1.39)	0.432032	0.99075	519	1418	0.82 (0.42,1.58)	0.548118	0.997105
		rs222040	AA	360	396	1.00 (ref)	0.31031	0.945666	231	396	1.00 (ref)	0.470781	0.995233	129	396	1.00 (ref)	0.340939	0.975592
			AG	614	599	1.15 (0.96,1.38)			386	599	1.12 (0.91,1.38)			228	599	1.21 (0.94,1.56)
			GG	226	224	1.14 (0.90,1.44)			147	224	1.15 (0.88,1.51)			79	224	1.14 (0.82,1.59)
			Additive*	1200	1219	1.08 (0.96,1.21)	0.214854	0.919641	764	1219	1.08 (0.95,1.23)	0.252547	0.954353	436	1219	1.09 (0.93,1.27)	0.311563	0.925554
			Dominant (AG + GG vs. AA)	1200	1219	1.15 (0.96,1.36)	0.126849	0.876046	764	1219	1.13 (0.93,1.38)	0.227923	0.954412	436	1219	1.19 (0.94,1.52)	0.155997	0.895508
			Recessive (GG vs. AA + AG)	1200	1219	1.04 (0.85,1.28)	0.691392	0.999936	764	1219	1.08 (0.85,1.36)	0.543055	0.99075	436	1219	1.02 (0.76,1.36)	0.914383	0.997105
		rs222046	GG	1250	1221	1.00 (ref)	0.382079	0.95768	792	1221	1.00 (ref)	0.528502	0.995233	458	1221	1.00 (ref)	0.508685	0.998465
			GA	151	170	0.86 (0.68,1.09)			96	170	0.86 (0.66,1.13)			55	170	0.87 (0.63,1.20)
			AA	4	6	0.64 (0.18,2.28)			3	6	0.78 (0.19,3.14)			1	6	0.41 (0.05,3.47)
			Additive*	1405	1397	0.86 (0.69,1.07)	0.170818	0.916293	891	1397	0.87 (0.67,1.11)	0.259573	0.954353	514	1397	0.84 (0.62,1.15)	0.283635	0.895465
			Dominant (GA + AA vs. GG)	1405	1397	0.86 (0.68,1.08)	0.190591	0.908669	891	1397	0.86 (0.66,1.12)	0.262435	0.954412	514	1397	0.85 (0.62,1.18)	0.332749	0.943389
			Recessive (AA vs. GG + GA)	1405	1397	0.65 (0.18,2.31)	0.504286	0.999936	891	1397	0.79 (0.20,3.19)	0.742728	0.99075	514	1397	0.42 (0.05,3.53)	0.423751	0.986454
		rs222054	CC	716	713	1.00 (ref)	0.766311	0.995817	443	713	1.00 (ref)	0.568158	0.995233	273	713	1.00 (ref)	0.636988	0.998465
			CG	572	565	1.00 (0.86,1.17)			374	565	1.06 (0.88,1.26)			198	565	0.90 (0.73,1.12)
			GG	115	125	0.91 (0.69,1.19)			69	125	0.89 (0.65,1.23)			46	125	0.93 (0.64,1.35)
			Additive*	1403	1403	0.97 (0.87,1.09)	0.648491	0.988751	886	1403	0.99 (0.87,1.13)	0.896688	0.990677	517	1403	0.94 (0.80,1.10)	0.433389	0.925584
			Dominant (CG + GG vs. CC)	1403	1403	0.99 (0.85,1.14)	0.857615	0.990522	886	1403	1.03 (0.87,1.22)	0.751283	0.977938	517	1403	0.91 (0.74,1.11)	0.349362	0.95327
			Recessive (GG vs. CC + CG)	1403	1403	0.91 (0.69,1.18)	0.466614	0.999936	886	1403	0.87 (0.64,1.19)	0.385312	0.99075	517	1403	0.97 (0.68,1.39)	0.884074	0.997105
		rs2298849	AA	900	924	1.00 (ref)	0.332321	0.945666	571	924	1.00 (ref)	0.376954	0.995233	329	924	1.00 (ref)	0.62574	0.998465
			AG	459	429	1.10 (0.94,1.29)			290	429	1.11 (0.92,1.34)			169	429	1.09 (0.87,1.35)
			GG	42	51	0.85 (0.56,1.29)			26	51	0.85 (0.52,1.38)			16	51	0.85 (0.48,1.52)
			Additive*	1401	1404	1.03 (0.90,1.18)	0.643641	0.988751	887	1404	1.04 (0.89,1.21)	0.622373	0.984164	514	1404	1.02 (0.85,1.23)	0.807399	0.9965
			Dominant (AG + GG vs. AA)	1401	1404	1.07 (0.92,1.25)	0.376144	0.908669	887	1404	1.08 (0.91,1.30)	0.377351	0.95596	514	1404	1.06 (0.86,1.31)	0.594027	0.984023
			Recessive (GG vs. AA + AG)	1401	1404	0.82 (0.54,1.24)	0.350166	0.987136	887	1404	0.82 (0.50,1.32)	0.408591	0.99075	514	1404	0.83 (0.46,1.47)	0.521187	0.997105
		rs2298850	GG	703	721	1.00 (ref)	0.828928	0.998205	442	721	1.00 (ref)	0.604826	0.995233	261	721	1.00 (ref)	0.593017	0.998465
			GC	542	530	1.05 (0.90,1.23)			347	530	1.07 (0.90,1.29)			195	530	1.02 (0.82,1.27)
			CC	106	106	1.03 (0.77,1.38)			61	106	0.93 (0.66,1.30)			45	106	1.22 (0.83,1.79)
			Additive*	1351	1357	1.03 (0.91,1.16)	0.620472	0.988751	850	1357	1.01 (0.88,1.16)	0.873767	0.990677	501	1357	1.07 (0.91,1.26)	0.426847	0.925584
			Dominant (GC + CC vs. GG)	1351	1357	1.05 (0.90,1.22)	0.549559	0.939842	850	1357	1.05 (0.88,1.25)	0.588071	0.966481	501	1357	1.05 (0.85,1.29)	0.64051	0.988428
			Recessive (CC vs. GG + GC)	1351	1357	1.01 (0.76,1.34)	0.952901	0.999936	850	1357	0.90 (0.64,1.25)	0.520599	0.99075	501	1357	1.21 (0.84,1.75)	0.312406	0.986454
		rs3733359	GG	1232	1259	1.00 (ref)	0.0353716	0.797082	787	1259	1.00 (ref)	0.162993	0.959763	445	1259	1.00 (ref)	0.0207491	0.775433
			GA	164	123	1.36 (1.07,1.75)			97	123	1.28 (0.96,1.69)			67	123	1.57 (1.14,2.17)
			AA	2	4	0.52 (0.09,2.83)			1	4	0.39 (0.04,3.48)			1	4	0.73 (0.08,6.69)
			Additive*	1398	1386	1.30 (1.02,1.64)	0.0327303	0.792195	885	1386	1.21 (0.92,1.58)	0.173932	0.919895	513	1386	1.49 (1.09,2.02)	0.0113177	0.518812
			Dominant (GA + AA vs. GG)	1398	1386	1.34 (1.05,1.71)	0.0200121	0.597133	885	1386	1.25 (0.94,1.65)	0.12134	0.895653	513	1386	1.55 (1.13,2.13)	0.00722269	0.41616
			Recessive (AA vs. GG + GA)	1398	1386	0.50 (0.09,2.74)	0.42388	0.999936	885	1386	0.38 (0.04,3.39)	0.38379	0.99075	513	1386	0.70 (0.08,6.38)	0.749605	0.997105
		rs3755967	GG	680	702	1.00 (ref)	0.776577	0.998205	435	702	1.00 (ref)	0.946611	0.995233	245	702	1.00 (ref)	0.537354	0.998465
			GA	530	528	1.04 (0.89,1.22)			335	528	1.03 (0.86,1.24)			195	528	1.07 (0.86,1.33)
			AA	123	118	1.09 (0.83,1.44)			75	118	1.03 (0.75,1.42)			48	118	1.22 (0.84,1.78)
			Additive*	1333	1348	1.04 (0.93,1.17)	0.477055	0.958231	845	1348	1.02 (0.89,1.17)	0.75969	0.986214	488	1348	1.09 (0.93,1.28)	0.282371	0.895465
			Dominant (GA + AA vs. GG)	1333	1348	1.05 (0.90,1.22)	0.520665	0.939842	845	1348	1.03 (0.87,1.23)	0.740569	0.977938	488	1348	1.10 (0.89,1.35)	0.391752	0.962555
			Recessive (AA vs. GG + GA)	1333	1348	1.07 (0.82,1.40)	0.618766	0.999936	845	1348	1.02 (0.75,1.38)	0.907239	0.999227	488	1348	1.19 (0.83,1.70)	0.340802	0.986454
		rs423817	CC	789	804	1.00 (ref)	0.602119	0.97639	507	804	1.00 (ref)	0.670471	0.995233	282	804	1.00 (ref)	0.473875	0.996002
			CA	499	499	1.01 (0.87,1.19)			307	499	0.96 (0.80,1.15)			192	499	1.10 (0.89,1.37)
			AA	97	84	1.17 (0.86,1.60)			61	84	1.13 (0.80,1.61)			36	84	1.24 (0.82,1.89)
			Additive*	1385	1387	1.05 (0.93,1.18)	0.436049	0.958231	875	1387	1.01 (0.88,1.16)	0.850804	0.990677	510	1387	1.11 (0.94,1.31)	0.222636	0.889865
			Dominant (CA + AA vs. CC)	1385	1387	1.04 (0.89,1.21)	0.634219	0.963936	875	1387	0.99 (0.83,1.17)	0.87352	0.983582	510	1387	1.12 (0.91,1.38)	0.272251	0.942545
			Recessive (AA vs. CC + CA)	1385	1387	1.17 (0.86,1.58)	0.321641	0.985701	875	1387	1.15 (0.81,1.62)	0.430042	0.99075	510	1387	1.19 (0.79,1.80)	0.398742	0.986454
		rs56097748	AA	1257	1275	1.00 (ref)	0.127659	0.871526	800	1275	1.00 (ref)	0.300989	0.995233	457	1275	1.00 (ref)	0.231949	0.968615
			AG	156	132	1.20 (0.94,1.54)			95	132	1.16 (0.88,1.54)			61	132	1.26 (0.91,1.75)
			GG	6	12	0.51 (0.19,1.37)			4	12	0.52 (0.16,1.63)			2	12	0.48 (0.10,2.17)
			Additive*	1419	1419	1.08 (0.87,1.35)	0.48154	0.958231	899	1419	1.05 (0.82,1.35)	0.708803	0.986214	520	1419	1.12 (0.84,1.50)	0.445612	0.925584
			Dominant (AG + GG vs. AA)	1419	1419	1.15 (0.90,1.46)	0.260474	0.908669	899	1419	1.11 (0.84,1.45)	0.467957	0.966481	520	1419	1.20 (0.87,1.65)	0.267292	0.942545
			Recessive (GG vs. AA + AG)	1419	1419	0.50 (0.18,1.34)	0.165813	0.948302	899	1419	0.51 (0.16,1.61)	0.250173	0.99075	520	1419	0.46 (0.10,2.11)	0.321439	0.986454
		rs705117	AA	1052	1044	1.00 (ref)	0.846888	0.998205	662	1044	1.00 (ref)	0.831445	0.995233	390	1044	1.00 (ref)	0.833253	0.998465
			AG	327	339	0.95 (0.80,1.14)			210	339	0.97 (0.79,1.18)			117	339	0.94 (0.74,1.20)
			GG	32	30	1.05 (0.63,1.74)			22	30	1.15 (0.66,2.02)			10	30	0.87 (0.42,1.81)
			Additive*	1411	1413	0.98 (0.84,1.13)	0.744283	0.996837	894	1413	1.00 (0.85,1.19)	0.985085	0.994982	517	1413	0.94 (0.76,1.16)	0.546029	0.967616
			Dominant (AG + GG vs. AA)	1411	1413	0.96 (0.81,1.14)	0.653611	0.965622	894	1413	0.98 (0.81,1.19)	0.874892	0.983582	517	1413	0.93 (0.74,1.18)	0.56632	0.979074
			Recessive (GG vs. AA + AG)	1411	1413	1.06 (0.64,1.76)	0.812983	0.999936	894	1413	1.16 (0.66,2.04)	0.597998	0.99075	517	1413	0.89 (0.43,1.84)	0.743312	0.997105
		rs76781122	CC	1338	1334	1.00 (ref)	0.985307	0.999638	847	1334	1.00 (ref)	0.995911	0.999318	491	1334	1.00 (ref)	0.971625	0.998465
			CA	81	83	0.97 ( 7.100000e-01, 1.340000e+00)			52	83	0.99 ( 6.900000e-01, 1.420000e+00)			29	83	0.95 (0.61,1.47)
			AA	0	2	- (-,-)			0	2	- (-,-)			0	2	- (-,-)
			Additive*	1419	1419	0.93 (0.68,1.27)	0.640824	0.988751	899	1419	0.94 (0.66,1.34)	0.729952	0.986214	520	1419	0.91 (0.59,1.40)	0.652894	0.978592
			Dominant (CA + AA vs. CC)	1419	1419	0.95 (0.69,1.30)	0.754676	0.978534	899	1419	0.96 (0.67,1.38)	0.83571	0.977938	520	1419	0.93 (0.60,1.44)	0.72943	0.988428
			Recessive (AA vs. CC + CA)	1419	1419	- (-,-)	0.956211	0.999936	899	1419	- (-,-)	0.957725	0.999227	520	1419	- (-,-)	0.982626	0.997105
		rs76803094	GG	1344	1346	1.00 (ref)	0.947774	0.999638	853	1346	1.00 (ref)	0.719721	0.995233	491	1346	1.00 (ref)	0.922478	0.998465
			GA	67	70	0.94 ( 6.700000e-01, 1.340000e+00)			39	70	0.84 ( 5.600000e-01, 1.270000e+00)			28	70	1.10 (0.69,1.74)
			AA	0	1	- (-,-)			0	1	- (-,-)			0	1	- (-,-)
			Additive*	1411	1417	0.92 (0.65,1.29)	0.621221	0.988751	892	1417	0.82 (0.55,1.23)	0.341597	0.95727	519	1417	1.06 (0.68,1.67)	0.791374	0.9965
			Dominant (GA + AA vs. GG)	1411	1417	0.93 (0.66,1.32)	0.682033	0.965622	892	1417	0.83 (0.55,1.25)	0.376247	0.95596	519	1417	1.08 (0.68,1.71)	0.738213	0.988428
			Recessive (AA vs. GG + GA)	1411	1417	- (-,-)	0.952963	0.999936	892	1417	- (-,-)	0.970165	0.999227	519	1417	- (-,-)	0.987701	0.997105
		rs842873	GG	323	346	1.00 (ref)	0.188995	0.903158	195	346	1.00 (ref)	0.0321632	0.729255	128	346	1.00 (ref)	0.931084	0.998465
			GC	704	660	1.13 (0.94,1.37)			461	660	1.25 (1.01,1.55)			243	660	0.96 (0.74,1.23)
			CC	298	329	0.97 (0.78,1.21)			185	329	0.98 (0.76,1.26)			113	329	0.95 (0.71,1.29)
			Additive*	1325	1335	0.99 (0.88,1.10)	0.810763	0.997512	841	1335	0.99 (0.88,1.13)	0.908791	0.993606	484	1335	0.98 (0.84,1.13)	0.753081	0.994953
			Dominant (GC + CC vs. GG)	1325	1335	1.08 (0.90,1.29)	0.401305	0.909444	841	1335	1.16 (0.94,1.42)	0.158344	0.944491	484	1335	0.95 (0.75,1.21)	0.705526	0.988428
			Recessive (CC vs. GG + GC)	1325	1335	0.89 (0.74,1.07)	0.207643	0.958279	841	1335	0.84 (0.68,1.04)	0.10176	0.99075	484	1335	0.98 (0.76,1.26)	0.895711	0.997105
	LRP2	rs1003456	AA	943	931	1.00 (ref)	0.961619	0.999638	606	931	1.00 (ref)	0.821902	0.995233	337	931	1.00 (ref)	0.852344	0.998465
			AT	408	408	0.99 (0.84,1.17)			254	408	0.95 (0.79,1.15)			154	408	1.07 (0.85,1.34)
			TT	49	51	0.95 (0.63,1.42)			30	51	0.91 (0.57,1.45)			19	51	1.04 (0.60,1.80)
			Additive*	1400	1390	0.98 (0.86,1.13)	0.808532	0.997512	890	1390	0.95 (0.82,1.11)	0.531682	0.981487	510	1390	1.05 (0.87,1.26)	0.617781	0.975107
			Dominant (AT + TT vs. AA)	1400	1390	0.99 (0.84,1.15)	0.854188	0.990522	890	1390	0.95 (0.79,1.13)	0.546815	0.966481	510	1390	1.06 (0.86,1.32)	0.576524	0.98242
			Recessive (TT vs. AA + AT)	1400	1390	0.95 (0.64,1.42)	0.799905	0.999936	890	1390	0.92 (0.58,1.47)	0.741147	0.99075	510	1390	1.02 (0.59,1.76)	0.942556	0.997105
		rs10169232	GG	668	647	1.00 (ref)	0.110938	0.871526	426	647	1.00 (ref)	0.22734	0.977232	242	647	1.00 (ref)	0.292932	0.975592
			GC	582	631	0.89 (0.76,1.05)			369	631	0.91 (0.76,1.09)			213	631	0.89 (0.71,1.10)
			CC	159	134	1.15 (0.89,1.49)			98	134	1.16 (0.86,1.55)			61	134	1.14 (0.81,1.61)
			Additive*	1409	1412	1.01 (0.90,1.13)	0.918948	0.997512	893	1412	1.01 (0.89,1.15)	0.855197	0.990677	516	1412	1.00 (0.86,1.17)	0.969596	0.9965
			Dominant (GC + CC vs. GG)	1409	1412	0.94 (0.81,1.09)	0.406449	0.909444	893	1412	0.95 (0.80,1.13)	0.559661	0.966481	516	1412	0.93 (0.76,1.15)	0.5115	0.965378
			Recessive (CC vs. GG + GC)	1409	1412	1.22 (0.95,1.55)	0.116796	0.93822	893	1412	1.21 (0.92,1.60)	0.173294	0.99075	516	1412	1.21 (0.87,1.68)	0.250246	0.953598
		rs10199676	CC	1099	1105	1.00 (ref)	0.662279	0.98779	695	1105	1.00 (ref)	0.966334	0.996448	404	1105	1.00 (ref)	0.0930179	0.898325
			CA	290	282	1.03 (0.86,1.24)			180	282	1.00 (0.81,1.24)			110	282	1.08 (0.84,1.39)
			AA	22	28	0.79 (0.45,1.39)			19	28	1.08 (0.60,1.96)			3	28	0.28 (0.08,0.94)
			Additive*	1411	1415	0.99 (0.84,1.16)	0.898024	0.997512	894	1415	1.02 (0.85,1.21)	0.867869	0.990677	517	1415	0.94 (0.75,1.17)	0.566265	0.973084
			Dominant (CA + AA vs. CC)	1411	1415	1.01 (0.85,1.21)	0.900903	0.990522	894	1415	1.01 (0.82,1.24)	0.919495	0.988954	517	1415	1.01 (0.79,1.29)	0.963082	0.998034
			Recessive (AA vs. CC + CA)	1411	1415	0.79 (0.45,1.38)	0.401527	0.999936	894	1415	1.08 (0.60,1.96)	0.795097	0.995754	517	1415	0.28 (0.08,0.92)	0.036176	0.939462
		rs10204688	AA	739	753	1.00 (ref)	0.365474	0.95768	467	753	1.00 (ref)	0.362158	0.995233	272	753	1.00 (ref)	0.703063	0.998465
			AG	495	505	1.00 (0.85,1.18)			313	505	1.03 (0.86,1.24)			182	505	0.97 (0.78,1.21)
			GG	123	102	1.22 (0.92,1.62)			79	102	1.26 (0.92,1.73)			44	102	1.15 (0.78,1.69)
			Additive*	1357	1360	1.06 (0.94,1.19)	0.317347	0.921281	859	1360	1.08 (0.95,1.24)	0.242486	0.951741	498	1360	1.03 (0.87,1.21)	0.726576	0.992009
			Dominant (AG + GG vs. AA)	1357	1360	1.04 (0.89,1.21)	0.612964	0.963936	859	1360	1.07 (0.90,1.27)	0.459647	0.966481	498	1360	1.00 (0.81,1.23)	0.989635	0.998034
			Recessive (GG vs. AA + AG)	1357	1360	1.22 (0.93,1.61)	0.156109	0.939556	859	1360	1.25 (0.91,1.70)	0.163303	0.99075	498	1360	1.17 (0.80,1.70)	0.424109	0.986454
		rs10490129	CC	779	748	1.00 (ref)	0.465895	0.95768	491	748	1.00 (ref)	0.40518	0.995233	288	748	1.00 (ref)	0.890506	0.998465
			CG	510	531	0.92 (0.78,1.08)			322	531	0.90 (0.75,1.08)			188	531	0.95 (0.76,1.18)
			GG	98	88	1.06 (0.78,1.44)			65	88	1.07 (0.76,1.51)			33	88	1.01 (0.65,1.54)
			Additive*	1387	1367	0.97 (0.86,1.10)	0.678467	0.988751	878	1367	0.97 (0.84,1.11)	0.643774	0.984432	509	1367	0.98 (0.82,1.16)	0.777129	0.9965
			Dominant (CG + GG vs. CC)	1387	1367	0.94 (0.80,1.09)	0.404542	0.909444	878	1367	0.92 (0.77,1.10)	0.358698	0.95596	509	1367	0.96 (0.78,1.18)	0.681687	0.988428
			Recessive (GG vs. CC + CG)	1387	1367	1.10 (0.81,1.49)	0.532688	0.999936	878	1367	1.12 (0.80,1.57)	0.505949	0.99075	509	1367	1.03 (0.67,1.56)	0.903191	0.997105
		rs10490131	AA	995	1015	1.00 (ref)	0.824909	0.998205	626	1015	1.00 (ref)	0.724743	0.995233	369	1015	1.00 (ref)	0.994676	0.99956
			AG	368	367	1.02 (0.86,1.21)			236	367	1.03 (0.85,1.25)			132	367	0.99 (0.78,1.25)
			GG	30	35	0.87 (0.53,1.43)			18	35	0.81 (0.45,1.45)			12	35	0.97 (0.50,1.91)
			Additive*	1393	1417	0.99 (0.86,1.15)	0.934441	0.997512	880	1417	0.99 (0.84,1.17)	0.916599	0.993713	513	1417	0.99 (0.81,1.21)	0.921006	0.9965
			Dominant (AG + GG vs. AA)	1393	1417	1.01 (0.86,1.19)	0.922451	0.992475	880	1417	1.01 (0.84,1.22)	0.898116	0.984763	513	1417	0.99 (0.79,1.24)	0.931085	0.996665
			Recessive (GG vs. AA + AG)	1393	1417	0.87 (0.53,1.42)	0.568322	0.999936	880	1417	0.80 (0.45,1.44)	0.460678	0.99075	513	1417	0.97 (0.50,1.91)	0.938935	0.997105
		rs11689553	GG	844	842	1.00 (ref)	0.828625	0.998205	539	842	1.00 (ref)	0.705848	0.995233	305	842	1.00 (ref)	0.452887	0.990185
			GC	473	491	0.96 (0.82,1.13)			295	491	0.94 (0.78,1.12)			178	491	1.00 (0.80,1.25)
			CC	66	62	1.06 (0.74,1.52)			36	62	0.89 (0.58,1.37)			30	62	1.34 (0.84,2.12)
			Additive*	1383	1395	0.99 (0.87,1.13)	0.878715	0.997512	870	1395	0.94 (0.81,1.09)	0.405853	0.961096	513	1395	1.07 (0.90,1.27)	0.448077	0.925584
			Dominant (GC + CC vs. GG)	1383	1395	0.97 (0.83,1.13)	0.726859	0.970342	870	1395	0.93 (0.78,1.11)	0.419498	0.95596	513	1395	1.04 (0.84,1.28)	0.723	0.988428
			Recessive (CC vs. GG + GC)	1383	1395	1.07 (0.75,1.53)	0.696355	0.999936	870	1395	0.91 (0.60,1.40)	0.675665	0.99075	513	1395	1.34 (0.85,2.11)	0.208161	0.944054
		rs11887007	AA	480	479	1.00 (ref)	0.941223	0.999638	305	479	1.00 (ref)	0.978087	0.998719	175	479	1.00 (ref)	0.64847	0.998465
			AC	694	691	1.00 (0.85,1.18)			431	691	0.99 (0.82,1.19)			263	691	1.05 (0.83,1.31)
			CC	239	246	0.97 (0.78,1.21)			158	246	1.01 (0.79,1.29)			81	246	0.91 (0.67,1.24)
			Additive*	1413	1416	0.99 (0.89,1.10)	0.815081	0.997512	894	1416	1.00 (0.89,1.13)	0.990822	0.997135	519	1416	0.97 (0.84,1.13)	0.697904	0.985055
			Dominant (AC + CC vs. AA)	1413	1416	0.99 (0.85,1.16)	0.945387	0.993817	894	1416	0.99 (0.83,1.18)	0.922066	0.988954	519	1416	1.01 (0.81,1.25)	0.919728	0.993355
			Recessive (CC vs. AA + AC)	1413	1416	0.97 (0.79,1.18)	0.730146	0.999936	894	1416	1.02 (0.81,1.27)	0.886014	0.997721	519	1416	0.89 (0.67,1.17)	0.399041	0.986454
		rs11889511	GG	922	913	1.00 (ref)	0.817758	0.998205	583	913	1.00 (ref)	0.863989	0.995233	339	913	1.00 (ref)	0.798536	0.998465
			GC	438	442	0.98 (0.83,1.15)			278	442	0.99 (0.83,1.19)			160	442	0.96 (0.77,1.20)
			CC	51	57	0.88 (0.60,1.31)			33	57	0.88 (0.57,1.38)			18	57	0.84 (0.49,1.46)
			Additive*	1411	1412	0.96 (0.84,1.10)	0.597659	0.988751	894	1412	0.97 (0.84,1.13)	0.71238	0.986214	517	1412	0.94 (0.79,1.13)	0.536407	0.967616
			Dominant (GC + CC vs. GG)	1411	1412	0.97 (0.83,1.13)	0.702503	0.965622	894	1412	0.98 (0.82,1.17)	0.828876	0.977938	517	1412	0.95 (0.76,1.17)	0.619538	0.988428
			Recessive (CC vs. GG + GC)	1411	1412	0.89 (0.60,1.31)	0.554369	0.999936	894	1412	0.89 (0.57,1.38)	0.592055	0.99075	517	1412	0.85 (0.49,1.47)	0.568888	0.997105
		rs12614394	AA	711	668	1.00 (ref)	0.0886652	0.871526	454	668	1.00 (ref)	0.22643	0.977232	257	668	1.00 (ref)	0.178133	0.962857
			AG	585	590	0.93 (0.80,1.09)			366	590	0.91 (0.76,1.09)			219	590	0.96 (0.78,1.19)
			GG	107	136	0.74 (0.56,0.97)			70	136	0.77 (0.56,1.06)			37	136	0.69 (0.46,1.02)
			Additive*	1403	1394	0.89 (0.79,1.00)	0.0432539	0.833632	890	1394	0.89 (0.78,1.02)	0.0905453	0.919895	513	1394	0.88 (0.75,1.04)	0.130977	0.882405
			Dominant (AG + GG vs. AA)	1403	1394	0.89 (0.77,1.04)	0.141353	0.878304	890	1394	0.89 (0.75,1.05)	0.162429	0.944491	513	1394	0.91 (0.74,1.12)	0.365036	0.95393
			Recessive (GG vs. AA + AG)	1403	1394	0.76 (0.58,0.99)	0.0446171	0.89806	890	1394	0.81 (0.59,1.09)	0.164314	0.99075	513	1394	0.70 (0.48,1.03)	0.0684568	0.939462
		rs12988804	GG	761	734	1.00 (ref)	0.496792	0.95768	483	734	1.00 (ref)	0.43019	0.995233	278	734	1.00 (ref)	0.793054	0.998465
			GA	556	585	0.91 (0.78,1.07)			348	585	0.90 (0.76,1.08)			208	585	0.93 (0.75,1.15)
			AA	91	87	1.02 (0.74,1.39)			61	87	1.06 (0.75,1.51)			30	87	0.94 (0.61,1.47)
			Additive*	1408	1406	0.96 (0.85,1.08)	0.510747	0.966021	892	1406	0.96 (0.84,1.11)	0.610398	0.984164	516	1406	0.95 (0.80,1.12)	0.545444	0.967616
			Dominant (GA + AA vs. GG)	1408	1406	0.93 (0.80,1.08)	0.325196	0.908669	892	1406	0.92 (0.78,1.09)	0.352417	0.95596	516	1406	0.93 (0.76,1.14)	0.497704	0.965378
			Recessive (AA vs. GG + GA)	1408	1406	1.06 (0.78,1.44)	0.715737	0.999936	892	1406	1.11 (0.79,1.57)	0.536501	0.99075	516	1406	0.97 (0.63,1.50)	0.904654	0.997105
		rs13002827	AA	907	911	1.00 (ref)	0.258901	0.928476	575	911	1.00 (ref)	0.245242	0.977232	332	911	1.00 (ref)	0.701163	0.998465
			AG	468	448	1.05 (0.90,1.23)			297	448	1.05 (0.88,1.26)			171	448	1.06 (0.85,1.32)
			GG	40	54	0.73 (0.48,1.12)			24	54	0.68 (0.42,1.12)			16	54	0.85 (0.47,1.51)
			Additive*	1415	1413	0.98 (0.86,1.12)	0.749539	0.996837	896	1413	0.97 (0.83,1.13)	0.67533	0.986214	519	1413	1.01 (0.84,1.21)	0.925639	0.9965
			Dominant (AG + GG vs. AA)	1415	1413	1.02 (0.87,1.19)	0.836724	0.98869	896	1413	1.01 (0.85,1.21)	0.904496	0.985845	519	1413	1.04 (0.84,1.29)	0.719869	0.988428
			Recessive (GG vs. AA + AG)	1415	1413	0.72 (0.48,1.10)	0.126453	0.93822	896	1413	0.67 (0.41,1.10)	0.112557	0.99075	519	1413	0.83 (0.47,1.47)	0.519119	0.997105
		rs13389381	AA	1173	1167	1.00 (ref)	0.499372	0.957719	747	1167	1.00 (ref)	0.386192	0.995233	426	1167	1.00 (ref)	0.707042	0.998465
			AG	212	229	0.92 (0.75,1.13)			126	229	0.86 (0.68,1.10)			86	229	1.02 (0.78,1.35)
			GG	5	8	0.60 (0.19,1.87)			4	8	0.65 (0.19,2.20)			1	8	0.42 (0.05,3.42)
			Additive*	1390	1404	0.90 (0.74,1.09)	0.295217	0.921281	877	1404	0.85 (0.68,1.07)	0.171645	0.919895	513	1404	0.99 (0.76,1.29)	0.922186	0.9965
			Dominant (AG + GG vs. AA)	1390	1404	0.91 (0.74,1.11)	0.350149	0.908669	877	1404	0.85 (0.67,1.08)	0.191424	0.945508	513	1404	1.01 (0.76,1.32)	0.964892	0.998034
			Recessive (GG vs. AA + AG)	1390	1404	0.61 (0.20,1.90)	0.395153	0.999936	877	1404	0.67 (0.20,2.25)	0.514325	0.99075	513	1404	0.42 (0.05,3.40)	0.413693	0.986454
		rs13397109	GG	1267	1259	1.00 (ref)	0.616435	0.977081	794	1259	1.00 (ref)	0.643566	0.995233	473	1259	1.00 (ref)	0.364785	0.976459
			GC	142	151	0.94 ( 0.74, 1.20)			99	151	1.04 ( 0.80, 1.37)			43	151	0.78 ( 0.54, 1.11)
			CC	4	2	2.07 ( 0.38,11.38)			3	2	2.27 ( 0.38,13.72)			1	2	1.45 ( 0.13,16.54)
			Additive*	1413	1412	0.97 (0.77,1.23)	0.802366	0.997512	896	1412	1.08 (0.83,1.39)	0.585034	0.981941	517	1412	0.80 (0.56,1.13)	0.205056	0.882838
			Dominant (GC + CC vs. GG)	1413	1412	0.95 (0.75,1.21)	0.698672	0.965622	896	1412	1.06 (0.81,1.39)	0.669828	0.977938	517	1412	0.78 (0.55,1.12)	0.181005	0.897818
			Recessive (CC vs. GG + GC)	1413	1412	2.08 ( 0.38,11.46)	0.398581	0.999936	896	1412	2.26 ( 0.37,13.65)	0.375184	0.99075	517	1412	1.50 ( 0.13,17.04)	0.745615	0.997105
		rs16856558	GG	1369	1375	1.00 (ref)	0.963122	0.999638	864	1375	1.00 (ref)	0.998391	0.999318	505	1375	1.00 (ref)	0.637635	0.998465
			GA	37	39	0.94 ( 5.900000e-01, 1.490000e+00)			24	39	1.00 ( 5.900000e-01, 1.690000e+00)			13	39	0.86 (0.45,1.63)
			AA	2	0	268657.44 ( 0.000000e+00,6.849675e+200)			2	0	400821.33 ( 0.000000e+00,1.723719e+200)			0	0	- (-,-)
			Additive*	1408	1414	1.04 (0.67,1.60)	0.870643	0.997512	890	1414	1.15 (0.71,1.87)	0.566873	0.981487	518	1414	0.86 (0.45,1.63)	0.637635	0.975107
			Dominant (GA + AA vs. GG)	1408	1414	0.99 (0.63,1.55)	0.958411	0.993817	890	1414	1.08 (0.65,1.80)	0.764669	0.977938	518	1414	0.86 (0.45,1.63)	0.637635	0.988428
			Recessive (AA vs. GG + GA)	1408	1414	269262.47 ( 0.000000e+00,6.869508e+200)	0.956564	0.999936	890	1414	400804.78 ( 0.000000e+00,1.724132e+200)	0.955006	0.999227			- (-,-)	-
		rs16856748	GG	1084	1072	1.00 (ref)	0.866335	0.998205	685	1072	1.00 (ref)	0.811255	0.995233	399	1072	1.00 (ref)	0.75745	0.998465
			GA	303	313	0.95 (0.80,1.14)			190	313	0.94 (0.76,1.15)			113	313	0.99 (0.78,1.27)
			AA	19	20	0.94 (0.50,1.78)			14	20	1.07 (0.53,2.15)			5	20	0.68 (0.25,1.85)
			Additive*	1406	1405	0.96 (0.82,1.12)	0.597133	0.988751	889	1405	0.96 (0.80,1.15)	0.669251	0.986214	517	1405	0.96 (0.77,1.20)	0.707384	0.98734
			Dominant (GA + AA vs. GG)	1406	1405	0.95 (0.80,1.14)	0.593547	0.963936	889	1405	0.95 (0.77,1.16)	0.591752	0.966481	517	1405	0.97 (0.76,1.24)	0.835172	0.988428
			Recessive (AA vs. GG + GA)	1406	1405	0.95 (0.50,1.79)	0.872821	0.999936	889	1405	1.09 (0.54,2.18)	0.815669	0.997721	517	1405	0.69 (0.25,1.85)	0.457175	0.990436
		rs16856802	AA	1299	1294	1.00 (ref)	0.752636	0.995643	814	1294	1.00 (ref)	0.813853	0.995233	485	1294	1.00 (ref)	0.403607	0.981696
			AC	114	118	0.96 (0.73,1.26)			80	118	1.10 (0.81,1.49)			34	118	0.76 (0.51,1.13)
			CC	3	5	0.60 (0.14,2.52)			3	5	0.89 (0.21,3.77)			0	5	0.00 (0.00, Inf)
			Additive*	1416	1417	0.94 (0.73,1.21)	0.605874	0.988751	897	1417	1.08 (0.81,1.42)	0.60933	0.984164	519	1417	0.72 (0.49,1.06)	0.091787	0.784089
			Dominant (AC + CC vs. AA)	1416	1417	0.95 (0.73,1.23)	0.683493	0.965622	897	1417	1.09 (0.81,1.46)	0.564266	0.966481	519	1417	0.73 (0.49,1.09)	0.124063	0.853425
			Recessive (CC vs. AA + AC)	1416	1417	0.60 (0.14,2.52)	0.486009	0.999936	897	1417	0.89 (0.21,3.74)	0.868384	0.997721	519	1417	0.00 (0.00, Inf)	0.982262	0.997105
		rs2024481	AA	343	381	1.00 (ref)	0.211252	0.903158	219	381	1.00 (ref)	0.194331	0.977232	124	381	1.00 (ref)	0.478695	0.996002
			AC	713	709	1.12 (0.94,1.34)			443	709	1.09 (0.88,1.33)			270	709	1.16 (0.91,1.49)
			CC	348	322	1.21 (0.98,1.49)			226	322	1.24 (0.98,1.58)			122	322	1.14 (0.85,1.54)
			Additive*	1404	1412	1.10 (0.99,1.22)	0.0811079	0.893705	888	1412	1.12 (0.99,1.26)	0.0752249	0.919895	516	1412	1.07 (0.93,1.24)	0.357186	0.925584
			Dominant (AC + CC vs. AA)	1404	1412	1.15 (0.97,1.36)	0.114509	0.876046	888	1412	1.13 (0.93,1.38)	0.203643	0.945508	516	1412	1.16 (0.91,1.47)	0.227335	0.918488
			Recessive (CC vs. AA + AC)	1404	1412	1.12 (0.94,1.33)	0.207157	0.958279	888	1412	1.18 (0.97,1.44)	0.101606	0.99075	516	1412	1.03 (0.81,1.32)	0.785502	0.997105
		rs2052297	GG	371	392	1.00 (ref)	0.330344	0.945666	224	392	1.00 (ref)	0.495708	0.995233	147	392	1.00 (ref)	0.213385	0.968037
			GA	677	652	1.10 (0.92,1.32)			423	652	1.13 (0.92,1.39)			254	652	1.05 (0.83,1.34)
			AA	277	303	0.96 (0.77,1.20)			186	303	1.05 (0.82,1.35)			91	303	0.82 (0.60,1.11)
			Additive*	1325	1347	0.99 (0.89,1.10)	0.830726	0.997512	833	1347	1.03 (0.91,1.16)	0.642785	0.984432	492	1347	0.92 (0.79,1.07)	0.274349	0.895465
			Dominant (GA + AA vs. GG)	1325	1347	1.06 (0.89,1.25)	0.525975	0.939842	833	1347	1.10 (0.91,1.34)	0.321598	0.95596	492	1347	0.98 (0.78,1.23)	0.866811	0.988428
			Recessive (AA vs. GG + GA)	1325	1347	0.90 (0.75,1.09)	0.288379	0.983289	833	1347	0.97 (0.79,1.20)	0.780021	0.993314	492	1347	0.79 (0.61,1.04)	0.0882135	0.939462
		rs2075252	GG	786	791	1.00 (ref)	0.346178	0.955592	500	791	1.00 (ref)	0.299599	0.995233	286	791	1.00 (ref)	0.723813	0.998465
			GA	518	532	0.98 (0.84,1.15)			325	532	0.99 (0.83,1.18)			193	532	0.98 (0.79,1.22)
			AA	100	81	1.24 (0.91,1.70)			65	81	1.30 (0.92,1.84)			35	81	1.17 (0.76,1.79)
			Additive*	1404	1404	1.05 (0.93,1.18)	0.447645	0.958231	890	1404	1.06 (0.93,1.22)	0.373407	0.961096	514	1404	1.03 (0.87,1.22)	0.737512	0.994061
			Dominant (GA + AA vs. GG)	1404	1404	1.02 (0.88,1.18)	0.821765	0.98869	890	1404	1.03 (0.87,1.22)	0.735962	0.977938	514	1404	1.00 (0.82,1.23)	0.973224	0.998034
			Recessive (AA vs. GG + GA)	1404	1404	1.25 (0.92,1.70)	0.149473	0.93822	890	1404	1.31 (0.93,1.84)	0.121712	0.99075	514	1404	1.18 (0.78,1.79)	0.43534	0.986454
		rs2111187	GG	729	685	1.00 (ref)	0.253593	0.928476	470	685	1.00 (ref)	0.227374	0.977232	259	685	1.00 (ref)	0.801617	0.998465
			GA	547	586	0.88 (0.75,1.02)			341	586	0.86 (0.72,1.02)			206	586	0.93 (0.75,1.16)
			AA	139	140	0.93 (0.72,1.21)			85	140	0.91 (0.67,1.22)			54	140	1.00 (0.70,1.41)
			Additive*	1415	1411	0.93 (0.83,1.04)	0.216266	0.919641	896	1411	0.91 (0.80,1.04)	0.169619	0.919895	519	1411	0.97 (0.84,1.14)	0.737593	0.994061
			Dominant (GA + AA vs. GG)	1415	1411	0.89 (0.76,1.03)	0.112453	0.876046	896	1411	0.87 (0.73,1.02)	0.0923502	0.895653	519	1411	0.94 (0.77,1.16)	0.583098	0.983065
			Recessive (AA vs. GG + GA)	1415	1411	0.99 (0.77,1.27)	0.934166	0.999936	896	1411	0.97 (0.73,1.29)	0.829191	0.997721	519	1411	1.03 (0.74,1.44)	0.8641	0.997105
		rs2161039	GG	419	445	1.00 (ref)	0.539117	0.972276	271	445	1.00 (ref)	0.713638	0.995233	148	445	1.00 (ref)	0.430454	0.981696
			GA	690	664	1.10 (0.93,1.31)			436	664	1.07 (0.88,1.30)			254	664	1.16 (0.92,1.47)
			AA	288	289	1.06 (0.86,1.31)			177	289	1.00 (0.78,1.27)			111	289	1.15 (0.86,1.55)
			Additive*	1397	1398	1.04 (0.93,1.15)	0.508016	0.966021	884	1398	1.01 (0.89,1.13)	0.913118	0.993713	513	1398	1.08 (0.94,1.25)	0.283264	0.895465
			Dominant (GA + AA vs. GG)	1397	1398	1.09 (0.93,1.28)	0.299892	0.908669	884	1398	1.05 (0.87,1.26)	0.599656	0.966481	513	1398	1.16 (0.93,1.45)	0.194441	0.911704
			Recessive (AA vs. GG + GA)	1397	1398	1.00 (0.83,1.20)	0.98199	0.999936	884	1398	0.96 (0.77,1.18)	0.68006	0.99075	513	1398	1.05 (0.82,1.35)	0.684927	0.997105
		rs2228171	GG	770	765	1.00 (ref)	0.817525	0.998205	495	765	1.00 (ref)	0.980265	0.99898	275	765	1.00 (ref)	0.403201	0.981696
			GA	531	543	0.97 (0.83,1.14)			339	543	1.00 (0.83,1.19)			192	543	0.94 (0.76,1.18)
			AA	112	104	1.07 (0.80,1.42)			63	104	0.97 (0.69,1.35)			49	104	1.23 (0.85,1.78)
			Additive*	1413	1412	1.01 (0.89,1.13)	0.924759	0.997512	897	1412	0.99 (0.86,1.13)	0.878283	0.990677	516	1412	1.04 (0.88,1.22)	0.641572	0.975107
			Dominant (GA + AA vs. GG)	1413	1412	0.99 (0.85,1.15)	0.867997	0.990522	897	1412	0.99 (0.84,1.18)	0.928435	0.989504	516	1412	0.99 (0.81,1.22)	0.926154	0.993829
			Recessive (AA vs. GG + GA)	1413	1412	1.08 (0.82,1.43)	0.594705	0.999936	897	1412	0.97 (0.70,1.34)	0.843776	0.997721	516	1412	1.26 (0.88,1.81)	0.211599	0.950635
		rs2229266	GG	740	803	1.00 (ref)	0.0674341	0.871526	451	803	1.00 (ref)	0.0086483	0.530957	289	803	1.00 (ref)	0.257293	0.968615
			GA	549	497	1.20 (1.02,1.40)			352	497	1.27 (1.06,1.52)			197	497	1.10 (0.88,1.36)
			AA	112	105	1.17 (0.88,1.55)			83	105	1.43 (1.05,1.96)			29	105	0.76 (0.49,1.18)
			Additive*	1401	1405	1.13 (1.01,1.27)	0.0404767	0.833632	886	1405	1.23 (1.07,1.40)	0.00237596	0.310538	515	1405	0.98 (0.83,1.15)	0.770422	0.9965
			Dominant (GA + AA vs. GG)	1401	1405	1.19 (1.03,1.39)	0.0206179	0.597133	886	1405	1.30 (1.09,1.54)	0.00281057	0.377361	515	1405	1.04 (0.84,1.28)	0.716901	0.988428
			Recessive (AA vs. GG + GA)	1401	1405	1.08 (0.82,1.43)	0.573005	0.999936	886	1405	1.30 (0.96,1.76)	0.0890445	0.973242	515	1405	0.73 (0.48,1.13)	0.158075	0.939462
		rs2229267	AA	810	822	1.00 (ref)	0.568358	0.972276	511	822	1.00 (ref)	0.542626	0.995233	299	822	1.00 (ref)	0.861456	0.998465
			AG	497	483	1.04 (0.89,1.22)			316	483	1.05 (0.88,1.26)			181	483	1.03 (0.83,1.29)
			GG	74	85	0.87 (0.63,1.21)			46	85	0.85 (0.58,1.24)			28	85	0.91 (0.58,1.44)
			Additive*	1381	1390	0.99 (0.87,1.12)	0.847326	0.997512	873	1390	0.99 (0.86,1.14)	0.866953	0.990677	508	1390	1.00 (0.84,1.18)	0.955308	0.9965
			Dominant (AG + GG vs. AA)	1381	1390	1.02 (0.87,1.18)	0.835974	0.98869	873	1390	1.02 (0.86,1.22)	0.802544	0.977938	508	1390	1.02 (0.82,1.25)	0.880416	0.988428
			Recessive (GG vs. AA + AG)	1381	1390	0.86 (0.62,1.18)	0.34933	0.987136	873	1390	0.83 (0.57,1.21)	0.339625	0.99075	508	1390	0.90 (0.58,1.41)	0.648669	0.997105
		rs2239596	AA	621	646	1.00 (ref)	0.552783	0.972276	378	646	1.00 (ref)	0.317258	0.995233	243	646	1.00 (ref)	0.824351	0.998465
			AG	618	588	1.09 (0.93,1.28)			396	588	1.15 (0.96,1.38)			222	588	1.00 (0.80,1.24)
			GG	136	139	1.01 (0.78,1.32)			89	139	1.11 (0.82,1.49)			47	139	0.89 (0.62,1.29)
			Additive*	1375	1373	1.04 (0.92,1.16)	0.537576	0.981301	863	1373	1.09 (0.95,1.24)	0.220292	0.927557	512	1373	0.96 (0.82,1.13)	0.64434	0.975107
			Dominant (AG + GG vs. AA)	1375	1373	1.08 (0.92,1.25)	0.343804	0.908669	863	1373	1.14 (0.96,1.36)	0.135552	0.937386	512	1373	0.98 (0.79,1.20)	0.813882	0.988428
			Recessive (GG vs. AA + AG)	1375	1373	0.97 (0.76,1.25)	0.824849	0.999936	863	1373	1.03 (0.78,1.37)	0.834011	0.997721	512	1373	0.89 (0.63,1.27)	0.535265	0.997105
		rs2239602	AA	1112	1110	1.00 (ref)	0.868291	0.998205	702	1110	1.00 (ref)	0.95326	0.995233	410	1110	1.00 (ref)	0.561551	0.998465
			AG	288	291	0.99 (0.82,1.19)			184	291	1.03 (0.84,1.27)			104	291	0.92 (0.71,1.19)
			GG	14	17	0.83 (0.40,1.69)			10	17	0.97 (0.44,2.15)			4	17	0.61 (0.20,1.83)
			Additive*	1414	1418	0.97 (0.82,1.15)	0.755553	0.996837	896	1418	1.02 (0.85,1.24)	0.820298	0.990206	518	1418	0.89 (0.71,1.13)	0.340463	0.925584
			Dominant (AG + GG vs. AA)	1414	1418	0.98 (0.82,1.18)	0.838951	0.98869	896	1418	1.03 (0.84,1.26)	0.786914	0.977938	518	1418	0.90 (0.70,1.16)	0.417679	0.964065
			Recessive (GG vs. AA + AG)	1414	1418	0.83 (0.41,1.69)	0.601882	0.999936	896	1418	0.96 (0.44,2.13)	0.92619	0.999227	518	1418	0.62 (0.21,1.86)	0.393469	0.986454
		rs2268365	AA	1053	1053	1.00 (ref)	0.817672	0.998205	663	1053	1.00 (ref)	0.573366	0.995233	390	1053	1.00 (ref)	0.806648	0.998465
			AG	314	296	1.06 (0.88,1.27)			204	296	1.08 (0.88,1.32)			110	296	1.02 (0.79,1.31)
			GG	19	20	0.95 (0.50,1.79)			10	20	0.75 (0.35,1.63)			9	20	1.31 (0.58,2.93)
			Additive*	1386	1369	1.04 (0.88,1.22)	0.657515	0.988751	877	1369	1.03 (0.86,1.24)	0.758301	0.986214	509	1369	1.05 (0.84,1.31)	0.680369	0.980927
			Dominant (AG + GG vs. AA)	1386	1369	1.05 (0.88,1.25)	0.587673	0.960088	877	1369	1.06 (0.86,1.29)	0.585419	0.966481	509	1369	1.03 (0.81,1.32)	0.789126	0.988428
			Recessive (GG vs. AA + AG)	1386	1369	0.94 (0.49,1.77)	0.837019	0.999936	877	1369	0.74 (0.34,1.60)	0.440977	0.99075	509	1369	1.30 (0.58,2.91)	0.519844	0.997105
		rs2268372	AA	890	881	1.00 (ref)	0.241733	0.924945	554	881	1.00 (ref)	0.384877	0.995233	336	881	1.00 (ref)	0.208855	0.968037
			AT	449	474	0.94 (0.80,1.10)			295	474	0.99 (0.82,1.18)			154	474	0.86 (0.68,1.07)
			TT	65	49	1.31 (0.89,1.92)			42	49	1.34 (0.87,2.06)			23	49	1.28 (0.76,2.16)
			Additive*	1404	1404	1.02 (0.89,1.16)	0.814994	0.997512	891	1404	1.05 (0.91,1.22)	0.504649	0.981487	513	1404	0.96 (0.80,1.15)	0.63205	0.975107
			Dominant (AT + TT vs. AA)	1404	1404	0.97 (0.83,1.14)	0.735659	0.970342	891	1404	1.02 (0.86,1.22)	0.820267	0.977938	513	1404	0.90 (0.72,1.11)	0.313884	0.942545
			Recessive (TT vs. AA + AT)	1404	1404	1.34 (0.91,1.96)	0.134483	0.93822	891	1404	1.35 (0.88,2.06)	0.169379	0.99075	513	1404	1.35 (0.81,2.26)	0.253946	0.953598
		rs2268373	CC	806	776	1.00 (ref)	0.17253	0.887783	509	776	1.00 (ref)	0.33274	0.995233	297	776	1.00 (ref)	0.237781	0.968615
			CG	518	561	0.89 (0.76,1.04)			331	561	0.90 (0.75,1.07)			187	561	0.87 (0.70,1.08)
			GG	87	72	1.16 (0.83,1.61)			54	72	1.13 (0.78,1.65)			33	72	1.22 (0.79,1.89)
			Additive*	1411	1409	0.97 (0.86,1.10)	0.658365	0.988751	894	1409	0.97 (0.84,1.12)	0.691921	0.986214	517	1409	0.97 (0.82,1.16)	0.764539	0.9965
			Dominant (CG + GG vs. CC)	1411	1409	0.92 (0.79,1.07)	0.279573	0.908669	894	1409	0.93 (0.78,1.10)	0.373094	0.95596	517	1409	0.91 (0.74,1.12)	0.374311	0.959263
			Recessive (GG vs. CC + CG)	1411	1409	1.21 (0.88,1.68)	0.242149	0.976657	894	1409	1.18 (0.82,1.71)	0.369344	0.99075	517	1409	1.29 (0.84,1.98)	0.249921	0.953598
		rs2268379	GG	809	825	1.00 (ref)	0.592484	0.97639	514	825	1.00 (ref)	0.811159	0.995233	295	825	1.00 (ref)	0.34179	0.975592
			GA	476	457	1.06 (0.90,1.25)			303	457	1.06 (0.88,1.28)			173	457	1.06 (0.85,1.33)
			AA	96	85	1.14 (0.84,1.56)			55	85	1.04 (0.72,1.48)			41	85	1.35 (0.90,2.01)
			Additive*	1381	1367	1.07 (0.94,1.20)	0.307898	0.921281	872	1367	1.04 (0.90,1.19)	0.592641	0.981941	509	1367	1.12 (0.95,1.32)	0.193672	0.882838
			Dominant (GA + AA vs. GG)	1381	1367	1.07 (0.92,1.25)	0.362774	0.908669	872	1367	1.06 (0.89,1.26)	0.527049	0.966481	509	1367	1.11 (0.90,1.36)	0.347942	0.952226
			Recessive (AA vs. GG + GA)	1381	1367	1.12 (0.83,1.52)	0.462846	0.999936	872	1367	1.01 (0.71,1.44)	0.944255	0.999227	509	1367	1.32 (0.89,1.95)	0.170824	0.939462
		rs2302694	GG	1155	1143	1.00 (ref)	0.759346	0.995817	737	1143	1.00 (ref)	0.586196	0.995233	418	1143	1.00 (ref)	0.976634	0.998465
			GA	255	265	0.95 (0.78,1.15)			156	265	0.91 (0.73,1.14)			99	265	1.02 (0.79,1.33)
			AA	8	10	0.78 (0.31,2.00)			5	10	0.69 (0.23,2.05)			3	10	0.93 (0.25,3.44)
			Additive*	1418	1418	0.94 (0.78,1.12)	0.489312	0.958231	898	1418	0.90 (0.73,1.11)	0.322402	0.95727	520	1418	1.02 (0.80,1.30)	0.899733	0.9965
			Dominant (GA + AA vs. GG)	1418	1418	0.94 (0.78,1.14)	0.530522	0.939842	898	1418	0.90 (0.73,1.12)	0.361912	0.95596	520	1418	1.02 (0.79,1.32)	0.875079	0.988428
			Recessive (AA vs. GG + GA)	1418	1418	0.79 (0.31,2.02)	0.622511	0.999936	898	1418	0.70 (0.24,2.09)	0.527338	0.99075	520	1418	0.92 (0.25,3.41)	0.901156	0.997105
		rs2389557	AA	350	328	1.00 (ref)	0.126228	0.871526	216	328	1.00 (ref)	0.524096	0.995233	134	328	1.00 (ref)	0.0596801	0.881742
			AG	704	666	0.99 (0.82,1.19)			440	666	1.00 (0.81,1.23)			264	666	0.98 (0.76,1.26)
			GG	311	351	0.82 (0.66,1.02)			206	351	0.89 (0.69,1.14)			105	351	0.73 (0.54,0.98)
			Additive*	1365	1345	0.91 (0.82,1.01)	0.0824279	0.893705	862	1345	0.94 (0.83,1.07)	0.34368	0.95727	503	1345	0.86 (0.74,0.99)	0.0423748	0.663953
			Dominant (AG + GG vs. AA)	1365	1345	0.93 (0.78,1.11)	0.42265	0.909564	862	1345	0.96 (0.79,1.17)	0.68645	0.977938	503	1345	0.89 (0.70,1.13)	0.348251	0.952226
			Recessive (GG vs. AA + AG)	1365	1345	0.83 (0.70,0.99)	0.0424723	0.89806	862	1345	0.89 (0.73,1.09)	0.255857	0.99075	503	1345	0.74 (0.57,0.95)	0.0178933	0.939462
		rs2544380	CC	699	710	1.00 (ref)	0.596229	0.97639	450	710	1.00 (ref)	0.550826	0.995233	249	710	1.00 (ref)	0.69645	0.998465
			CA	594	569	1.06 (0.91,1.24)			373	569	1.03 (0.87,1.24)			221	569	1.10 (0.89,1.36)
			AA	117	127	0.93 (0.71,1.23)			71	127	0.86 (0.63,1.19)			46	127	1.05 (0.72,1.52)
			Additive*	1410	1406	1.00 (0.90,1.13)	0.941913	0.997512	894	1406	0.97 (0.85,1.11)	0.679004	0.986214	516	1406	1.05 (0.90,1.23)	0.527844	0.967616
			Dominant (CA + AA vs. CC)	1410	1406	1.04 (0.89,1.20)	0.62598	0.963936	894	1406	1.00 (0.85,1.19)	0.966653	0.994194	516	1406	1.09 (0.89,1.34)	0.416856	0.964065
			Recessive (AA vs. CC + CA)	1410	1406	0.91 (0.70,1.19)	0.484514	0.999936	894	1406	0.85 (0.63,1.16)	0.305434	0.99075	516	1406	1.00 (0.70,1.43)	0.988837	0.997105
		rs2673170	GG	735	704	1.00 (ref)	0.680024	0.98779	473	704	1.00 (ref)	0.321627	0.995233	262	704	1.00 (ref)	0.613668	0.998465
			GC	569	582	0.94 (0.80,1.09)			357	582	0.91 (0.76,1.09)			212	582	0.98 (0.79,1.21)
			CC	96	99	0.93 (0.69,1.26)			53	99	0.79 (0.55,1.13)			43	99	1.19 (0.81,1.76)
			Additive*	1400	1385	0.95 (0.84,1.07)	0.417557	0.958231	883	1385	0.90 (0.78,1.03)	0.135823	0.919895	517	1385	1.04 (0.88,1.22)	0.62947	0.975107
			Dominant (GC + CC vs. GG)	1400	1385	0.94 (0.81,1.09)	0.37985	0.908669	883	1385	0.89 (0.75,1.06)	0.196424	0.945508	517	1385	1.01 (0.82,1.24)	0.922538	0.993355
			Recessive (CC vs. GG + GC)	1400	1385	0.96 (0.72,1.29)	0.797326	0.999936	883	1385	0.82 (0.58,1.16)	0.269994	0.99075	517	1385	1.21 (0.83,1.76)	0.332267	0.986454
		rs2892802	CC	1048	1044	1.00 (ref)	0.883523	0.998205	663	1044	1.00 (ref)	0.954419	0.995233	385	1044	1.00 (ref)	0.893767	0.998465
			CA	342	343	0.99 (0.84,1.18)			218	343	0.99 (0.81,1.21)			124	343	0.98 (0.77,1.25)
			AA	27	31	0.88 (0.52,1.48)			17	31	0.91 (0.50,1.67)			10	31	0.84 (0.41,1.75)
			Additive*	1417	1418	0.98 (0.84,1.14)	0.759823	0.996837	898	1418	0.98 (0.83,1.16)	0.831473	0.990677	519	1418	0.96 (0.78,1.18)	0.712685	0.988005
			Dominant (CA + AA vs. CC)	1417	1418	0.98 (0.83,1.16)	0.853821	0.990522	898	1418	0.99 (0.81,1.19)	0.885907	0.984592	519	1418	0.97 (0.77,1.22)	0.78794	0.988428
			Recessive (AA vs. CC + CA)	1417	1418	0.88 (0.52,1.48)	0.621841	0.999936	898	1418	0.91 (0.50,1.67)	0.766883	0.99075	519	1418	0.85 (0.41,1.76)	0.656262	0.997105
		rs35853478	GG	1301	1284	1.00 (ref)	0.388481	0.95768	830	1284	1.00 (ref)	0.322608	0.995233	471	1284	1.00 (ref)	0.289579	0.975592
			GA	109	127	0.84 ( 0.64, 1.10)			65	127	0.79 ( 5.700000e-01, 1.080000e+00)			44	127	0.92 ( 0.64, 1.33)
			AA	2	1	2.03 ( 0.18,22.49)			0	1	0.00 ( 0.000000e+00,1.419063e+271)			2	1	6.39 ( 0.57,71.40)
			Additive*	1412	1412	0.87 (0.67,1.13)	0.280264	0.921281	895	1412	0.77 (0.57,1.06)	0.10849	0.919895	517	1412	1.00 (0.71,1.42)	0.996712	0.996712
			Dominant (GA + AA vs. GG)	1412	1412	0.85 (0.65,1.11)	0.24147	0.908669	895	1412	0.78 (0.57,1.07)	0.119227	0.895653	517	1412	0.96 (0.67,1.37)	0.81994	0.988428
			Recessive (AA vs. GG + GA)	1412	1412	2.06 ( 0.19,22.80)	0.556812	0.999936	895	1412	0.00 ( 0.000000e+00,1.432501e+271)	0.970214	0.999227	517	1412	6.43 ( 0.58,71.89)	0.130785	0.939462
		rs3755166	GG	482	471	1.00 (ref)	0.257569	0.928476	308	471	1.00 (ref)	0.441013	0.995233	174	471	1.00 (ref)	0.314681	0.975592
			GA	654	661	0.96 (0.81,1.14)			403	661	0.93 (0.77,1.13)			251	661	1.01 (0.80,1.27)
			AA	204	240	0.83 (0.66,1.04)			132	240	0.85 (0.65,1.10)			72	240	0.80 (0.58,1.11)
			Additive*	1340	1372	0.92 (0.82,1.03)	0.135908	0.893705	843	1372	0.92 (0.81,1.05)	0.204064	0.919895	497	1372	0.92 (0.79,1.07)	0.275968	0.895465
			Dominant (GA + AA vs. GG)	1340	1372	0.93 (0.79,1.09)	0.353485	0.908669	843	1372	0.91 (0.76,1.09)	0.311037	0.95596	497	1372	0.96 (0.77,1.19)	0.698175	0.988428
			Recessive (AA vs. GG + GA)	1340	1372	0.85 (0.69,1.04)	0.112585	0.931495	843	1372	0.88 (0.70,1.11)	0.285094	0.99075	497	1372	0.80 (0.60,1.07)	0.12913	0.939462
		rs3770613	AA	422	415	1.00 (ref)	0.9138	0.998205	266	415	1.00 (ref)	0.745433	0.995233	156	415	1.00 (ref)	0.974147	0.998465
			AG	614	616	0.98 (0.82,1.17)			381	616	0.96 (0.78,1.18)			233	616	1.00 (0.79,1.27)
			GG	293	283	1.02 (0.82,1.26)			190	283	1.05 (0.82,1.33)			103	283	0.97 (0.72,1.30)
			Additive*	1329	1314	1.01 (0.90,1.12)	0.918548	0.997512	837	1314	1.02 (0.90,1.15)	0.769251	0.986214	492	1314	0.99 (0.85,1.14)	0.854031	0.9965
			Dominant (AG + GG vs. AA)	1329	1314	0.99 (0.84,1.17)	0.894684	0.990522	837	1314	0.99 (0.82,1.19)	0.898062	0.984763	492	1314	0.99 (0.79,1.24)	0.933453	0.997147
			Recessive (GG vs. AA + AG)	1329	1314	1.03 (0.86,1.24)	0.742798	0.999936	837	1314	1.07 (0.87,1.32)	0.511304	0.99075	492	1314	0.97 (0.75,1.26)	0.818972	0.997105
		rs3821127	AA	436	468	1.00 (ref)	0.306926	0.945666	268	468	1.00 (ref)	0.287351	0.995233	168	468	1.00 (ref)	0.704671	0.998465
			AG	664	650	1.09 (0.92,1.29)			418	650	1.11 (0.91,1.35)			246	650	1.06 (0.84,1.34)
			GG	208	185	1.20 (0.94,1.52)			133	185	1.24 (0.94,1.62)			75	185	1.15 (0.83,1.59)
			Additive*	1308	1303	1.09 (0.98,1.23)	0.124465	0.893705	819	1303	1.11 (0.97,1.27)	0.114368	0.919895	489	1303	1.07 (0.91,1.25)	0.405577	0.925584
			Dominant (AG + GG vs. AA)	1308	1303	1.11 (0.95,1.31)	0.191685	0.908669	819	1303	1.14 (0.94,1.37)	0.178088	0.944491	489	1303	1.08 (0.86,1.35)	0.498496	0.965378
			Recessive (GG vs. AA + AG)	1308	1303	1.14 (0.92,1.41)	0.241087	0.976657	819	1303	1.16 (0.91,1.49)	0.23094	0.99075	489	1303	1.11 (0.82,1.49)	0.499561	0.997105
		rs3845732	GG	793	824	1.00 (ref)	0.68881	0.98779	487	824	1.00 (ref)	0.447706	0.995233	306	824	1.00 (ref)	0.0839702	0.881742
			GA	470	458	1.07 (0.91,1.25)			301	458	1.10 (0.91,1.32)			169	458	1.02 (0.82,1.28)
			AA	63	68	0.96 (0.67,1.37)			51	68	1.22 (0.83,1.79)			12	68	0.49 (0.26,0.93)
			Additive*	1326	1350	1.03 (0.90,1.17)	0.69618	0.988751	839	1350	1.10 (0.95,1.27)	0.205277	0.919895	487	1350	0.90 (0.75,1.08)	0.260788	0.895465
			Dominant (GA + AA vs. GG)	1326	1350	1.05 (0.90,1.23)	0.523528	0.939842	839	1350	1.11 (0.93,1.33)	0.246411	0.954412	487	1350	0.96 (0.77,1.19)	0.697036	0.988428
			Recessive (AA vs. GG + GA)	1326	1350	0.93 (0.65,1.33)	0.698899	0.999936	839	1350	1.17 (0.80,1.72)	0.41121	0.99075	487	1350	0.49 (0.26,0.92)	0.0266909	0.939462
		rs3914468	AA	741	764	1.00 (ref)	0.558945	0.972276	469	764	1.00 (ref)	0.719519	0.995233	272	764	1.00 (ref)	0.402347	0.981696
			AG	535	509	1.09 (0.93,1.28)			328	509	1.07 (0.89,1.29)			207	509	1.13 (0.91,1.40)
			GG	114	117	1.00 (0.76,1.32)			78	117	1.08 (0.79,1.48)			36	117	0.89 (0.60,1.34)
			Additive*	1390	1390	1.04 (0.92,1.16)	0.559149	0.982766	875	1390	1.05 (0.92,1.20)	0.4435	0.981487	515	1390	1.02 (0.87,1.20)	0.805078	0.9965
			Dominant (AG + GG vs. AA)	1390	1390	1.07 (0.92,1.25)	0.367036	0.908669	875	1390	1.07 (0.90,1.28)	0.418871	0.95596	515	1390	1.08 (0.88,1.33)	0.44718	0.965212
			Recessive (GG vs. AA + AG)	1390	1390	0.96 (0.74,1.26)	0.792022	0.999936	875	1390	1.05 (0.78,1.43)	0.735821	0.99075	515	1390	0.85 (0.57,1.26)	0.415536	0.986454
		rs6713072	GG	465	495	1.00 (ref)	0.444543	0.95768	298	495	1.00 (ref)	0.587294	0.995233	167	495	1.00 (ref)	0.593187	0.998465
			GA	650	637	1.09 (0.92,1.28)			407	637	1.07 (0.89,1.30)			243	637	1.10 (0.87,1.39)
			AA	244	229	1.14 (0.92,1.43)			155	229	1.13 (0.88,1.46)			89	229	1.15 (0.85,1.57)
			Additive*	1359	1361	1.07 (0.96,1.19)	0.207839	0.919641	860	1361	1.07 (0.94,1.21)	0.303968	0.95727	499	1361	1.08 (0.93,1.25)	0.318812	0.925584
			Dominant (GA + AA vs. GG)	1359	1361	1.10 (0.94,1.29)	0.238132	0.908669	860	1361	1.09 (0.91,1.31)	0.351476	0.95596	499	1361	1.12 (0.90,1.39)	0.330346	0.942545
			Recessive (AA vs. GG + GA)	1359	1361	1.09 (0.89,1.33)	0.396628	0.999936	860	1361	1.09 (0.87,1.37)	0.463141	0.99075	499	1361	1.09 (0.83,1.43)	0.537437	0.997105
		rs6718884	AA	1266	1251	1.00 (ref)	0.612679	0.977081	809	1251	1.00 (ref)	0.275905	0.995233	457	1251	1.00 (ref)	0.955201	0.998465
			AG	129	144	0.88 (0.68,1.13)			73	144	0.78 (0.58,1.06)			56	144	1.05 (0.76,1.47)
			GG	11	11	0.99 (0.43,2.31)			7	11	0.98 (0.37,2.56)			4	11	1.00 (0.31,3.19)
			Additive*	1406	1406	0.91 (0.73,1.13)	0.394258	0.953835	889	1406	0.83 (0.64,1.08)	0.164597	0.919895	517	1406	1.04 (0.78,1.39)	0.794896	0.9965
			Dominant (AG + GG vs. AA)	1406	1406	0.89 (0.70,1.13)	0.34146	0.908669	889	1406	0.80 (0.60,1.06)	0.121573	0.895653	517	1406	1.05 (0.76,1.45)	0.771765	0.988428
			Recessive (GG vs. AA + AG)	1406	1406	1.01 (0.43,2.34)	0.98391	0.999936	889	1406	1.00 (0.38,2.62)	0.995669	0.99982	517	1406	0.99 (0.31,3.17)	0.990462	0.997105
		rs6730118	AA	878	904	1.00 (ref)	0.273597	0.940844	555	904	1.00 (ref)	0.529009	0.995233	323	904	1.00 (ref)	0.196653	0.968037
			AG	414	395	1.08 (0.92,1.28)			260	395	1.09 (0.90,1.31)			154	395	1.10 (0.87,1.38)
			GG	54	69	0.80 (0.55,1.16)			38	69	0.88 (0.58,1.33)			16	69	0.65 (0.37,1.14)
			Additive*	1346	1368	1.00 (0.87,1.14)	0.950722	0.997512	853	1368	1.01 (0.87,1.18)	0.858728	0.990677	493	1368	0.97 (0.80,1.16)	0.710854	0.98734
			Dominant (AG + GG vs. AA)	1346	1368	1.04 (0.89,1.22)	0.616793	0.963936	853	1368	1.05 (0.88,1.26)	0.575758	0.966481	493	1368	1.03 (0.83,1.28)	0.787633	0.988428
			Recessive (GG vs. AA + AG)	1346	1368	0.78 (0.54,1.13)	0.190752	0.958279	853	1368	0.85 (0.57,1.29)	0.449182	0.99075	493	1368	0.63 (0.36,1.10)	0.106389	0.939462
		rs700552	GG	611	603	1.00 (ref)	0.118531	0.871526	378	603	1.00 (ref)	0.32695	0.995233	233	603	1.00 (ref)	0.0843289	0.881742
			GC	656	627	1.04 (0.88,1.21)			422	627	1.09 (0.91,1.31)			234	627	0.95 (0.77,1.18)
			CC	146	181	0.80 (0.63,1.03)			96	181	0.89 (0.67,1.19)			50	181	0.67 (0.47,0.96)
			Additive*	1413	1411	0.94 (0.84,1.05)	0.260159	0.920347	896	1411	0.99 (0.87,1.12)	0.873643	0.990677	517	1411	0.86 (0.74,1.01)	0.0597265	0.663953
			Dominant (GC + CC vs. GG)	1413	1411	0.98 (0.85,1.14)	0.8317	0.98869	896	1411	1.05 (0.88,1.24)	0.589188	0.966481	517	1411	0.89 (0.72,1.09)	0.261456	0.94168
			Recessive (CC vs. GG + GC)	1413	1411	0.79 (0.62,0.99)	0.0435216	0.89806	896	1411	0.85 (0.65,1.12)	0.247686	0.99075	517	1411	0.69 (0.49,0.96)	0.0293398	0.939462
		rs7568568	AA	1173	1183	1.00 (ref)	0.912368	0.998205	750	1183	1.00 (ref)	0.975955	0.998276	423	1183	1.00 (ref)	0.559549	0.998465
			AG	227	221	1.04 (0.85,1.28)			136	221	0.97 (0.77,1.23)			91	221	1.15 (0.88,1.52)
			GG	14	15	0.95 (0.45,1.98)			10	15	1.01 (0.45,2.27)			4	15	0.84 (0.27,2.62)
			Additive*	1414	1419	1.03 (0.86,1.23)	0.781698	0.997512	896	1419	0.98 (0.80,1.21)	0.854488	0.990677	518	1419	1.10 (0.86,1.41)	0.436359	0.925584
			Dominant (AG + GG vs. AA)	1414	1419	1.04 (0.85,1.26)	0.728455	0.970342	896	1419	0.98 (0.78,1.23)	0.835214	0.977938	518	1419	1.14 (0.87,1.48)	0.353772	0.95393
			Recessive (GG vs. AA + AG)	1414	1419	0.94 (0.45,1.97)	0.868375	0.999936	896	1419	1.01 (0.45,2.28)	0.982095	0.999227	518	1419	0.82 (0.26,2.56)	0.735627	0.997105
		rs7592152	CC	570	569	1.00 (ref)	0.714224	0.98779	361	569	1.00 (ref)	0.908815	0.995233	209	569	1.00 (ref)	0.559309	0.998465
			CA	663	651	1.02 (0.87,1.20)			415	651	1.00 (0.83,1.20)			248	651	1.06 (0.85,1.32)
			AA	183	197	0.93 (0.73,1.17)			120	197	0.95 (0.73,1.23)			63	197	0.89 (0.64,1.24)
			Additive*	1416	1417	0.98 (0.88,1.09)	0.692068	0.988751	896	1417	0.98 (0.87,1.11)	0.745516	0.986214	520	1417	0.98 (0.84,1.14)	0.757752	0.994953
			Dominant (CA + AA vs. CC)	1416	1417	1.00 (0.86,1.16)	0.993235	0.997049	896	1417	0.99 (0.83,1.17)	0.883706	0.983819	520	1417	1.02 (0.83,1.26)	0.828094	0.988428
			Recessive (AA vs. CC + CA)	1416	1417	0.92 (0.74,1.14)	0.435609	0.999936	896	1417	0.95 (0.74,1.21)	0.661917	0.99075	520	1417	0.86 (0.63,1.18)	0.35159	0.986454
		rs7600336	GG	435	466	1.00 (ref)	0.209672	0.903158	267	466	1.00 (ref)	0.296456	0.995233	168	466	1.00 (ref)	0.33082	0.975592
			GA	709	663	1.15 (0.97,1.36)			448	663	1.16 (0.96,1.41)			261	663	1.11 (0.88,1.40)
			AA	245	259	1.01 (0.81,1.25)			161	259	1.07 (0.83,1.37)			84	259	0.90 (0.66,1.22)
			Additive*	1389	1388	1.02 (0.92,1.14)	0.686559	0.988751	876	1388	1.05 (0.93,1.19)	0.435052	0.978679	513	1388	0.97 (0.84,1.13)	0.722678	0.990084
			Dominant (GA + AA vs. GG)	1389	1388	1.11 (0.94,1.30)	0.213052	0.908669	876	1388	1.14 (0.95,1.37)	0.169477	0.944491	513	1388	1.05 (0.84,1.31)	0.656825	0.988428
			Recessive (AA vs. GG + GA)	1389	1388	0.93 (0.76,1.12)	0.432558	0.999936	876	1388	0.97 (0.78,1.21)	0.803664	0.996852	513	1388	0.85 (0.64,1.11)	0.23338	0.953598
		rs830958	AA	1072	1102	1.00 (ref)	0.480469	0.95768	679	1102	1.00 (ref)	0.775321	0.995233	393	1102	1.00 (ref)	0.333727	0.975592
			AC	261	244	1.12 (0.92,1.36)			161	244	1.08 (0.87,1.35)			100	244	1.19 (0.91,1.55)
			CC	16	19	0.87 (0.44,1.71)			12	19	0.96 (0.46,2.01)			4	19	0.67 (0.22,2.02)
			Additive*	1349	1365	1.07 (0.90,1.27)	0.441642	0.958231	852	1365	1.06 (0.87,1.28)	0.589513	0.981941	497	1365	1.10 (0.87,1.40)	0.431297	0.925584
			Dominant (AC + CC vs. AA)	1349	1365	1.10 (0.91,1.33)	0.327639	0.908669	852	1365	1.07 (0.86,1.33)	0.52069	0.966481	497	1365	1.15 (0.89,1.49)	0.286057	0.942545
			Recessive (CC vs. AA + AC)	1349	1365	0.85 (0.43,1.67)	0.639561	0.999936	852	1365	0.95 (0.45,1.98)	0.884958	0.997721	497	1365	0.65 (0.22,1.95)	0.440264	0.986454
		rs830964	GG	751	786	1.00 (ref)	0.19762	0.903158	469	786	1.00 (ref)	0.208619	0.977232	282	786	1.00 (ref)	0.443752	0.988558
			GA	545	500	1.15 (0.98,1.34)			349	500	1.18 (0.98,1.41)			196	500	1.11 (0.89,1.37)
			AA	98	106	0.97 (0.72,1.30)			65	106	1.03 (0.74,1.44)			33	106	0.86 (0.57,1.31)
			Additive*	1394	1392	1.05 (0.94,1.19)	0.380892	0.948814	883	1392	1.08 (0.95,1.24)	0.244171	0.954016	511	1392	1.01 (0.86,1.18)	0.938723	0.9965
			Dominant (GA + AA vs. GG)	1394	1392	1.12 (0.96,1.30)	0.154072	0.894985	883	1392	1.15 (0.97,1.37)	0.110015	0.895653	511	1392	1.06 (0.86,1.31)	0.567815	0.980363
			Recessive (AA vs. GG + GA)	1394	1392	0.92 (0.69,1.22)	0.547311	0.999936	883	1392	0.96 (0.70,1.33)	0.82812	0.997721	511	1392	0.83 (0.55,1.25)	0.369449	0.986454
		rs830965	GG	689	671	1.00 (ref)	0.827361	0.998205	436	671	1.00 (ref)	0.707572	0.995233	253	671	1.00 (ref)	0.940136	0.998465
			GA	616	618	0.97 (0.83,1.13)			392	618	0.97 (0.81,1.15)			224	618	0.97 (0.78,1.20)
			AA	101	107	0.92 (0.68,1.23)			63	107	0.87 (0.62,1.22)			38	107	1.02 (0.68,1.53)
			Additive*	1406	1396	0.96 (0.86,1.09)	0.550047	0.982243	891	1396	0.95 (0.83,1.09)	0.444772	0.981487	515	1396	0.99 (0.84,1.17)	0.911899	0.9965
			Dominant (GA + AA vs. GG)	1406	1396	0.96 (0.83,1.12)	0.626155	0.963936	891	1396	0.95 (0.80,1.13)	0.571883	0.966481	515	1396	0.98 (0.79,1.20)	0.813752	0.988428
			Recessive (AA vs. GG + GA)	1406	1396	0.93 (0.70,1.24)	0.62048	0.999936	891	1396	0.88 (0.64,1.22)	0.45845	0.99075	515	1396	1.04 (0.70,1.54)	0.85171	0.997105
		rs830966	GG	455	463	1.00 (ref)	0.85974	0.998205	292	463	1.00 (ref)	0.833785	0.995233	163	463	1.00 (ref)	0.960205	0.998465
			GC	681	665	1.04 (0.88,1.23)			433	665	1.04 (0.86,1.26)			248	665	1.03 (0.82,1.30)
			CC	255	260	1.00 (0.80,1.24)			157	260	0.97 (0.76,1.25)			98	260	1.03 (0.77,1.39)
			Additive*	1391	1388	1.01 (0.90,1.12)	0.921388	0.997512	882	1388	0.99 (0.88,1.12)	0.911632	0.993713	509	1388	1.02 (0.88,1.18)	0.814065	0.9965
			Dominant (GC + CC vs. GG)	1391	1388	1.03 (0.88,1.21)	0.71483	0.970342	882	1388	1.02 (0.85,1.22)	0.832244	0.977938	509	1388	1.03 (0.83,1.29)	0.775935	0.988428
			Recessive (CC vs. GG + GC)	1391	1388	0.97 (0.80,1.18)	0.791212	0.999936	882	1388	0.95 (0.76,1.18)	0.644704	0.99075	509	1388	1.01 (0.78,1.32)	0.934387	0.997105
		rs830993	TT	1180	1180	1.00 (ref)	0.951112	0.999638	738	1180	1.00 (ref)	0.860017	0.995233	442	1180	1.00 (ref)	0.39805	0.981696
			TA	216	220	0.98 (0.80,1.20)			144	220	1.06 (0.84,1.34)			72	220	0.86 (0.64,1.15)
			AA	6	7	0.86 (0.29,2.59)			5	7	1.10 (0.35,3.52)			1	7	0.38 (0.05,3.12)
			Additive*	1402	1407	0.97 (0.80,1.18)	0.795453	0.997512	887	1407	1.06 (0.86,1.32)	0.583822	0.981941	515	1407	0.84 (0.63,1.10)	0.206028	0.882838
			Dominant (TA + AA vs. TT)	1402	1407	0.98 (0.80,1.20)	0.823301	0.98869	887	1407	1.07 (0.85,1.34)	0.585355	0.966481	515	1407	0.84 (0.63,1.13)	0.247968	0.937022
			Recessive (AA vs. TT + TA)	1402	1407	0.87 (0.29,2.59)	0.797303	0.999936	887	1407	1.09 (0.34,3.49)	0.878524	0.997721	515	1407	0.39 (0.05,3.19)	0.376345	0.986454
		rs830995	GG	652	685	1.00 (ref)	0.509858	0.957719	393	685	1.00 (ref)	0.222108	0.977232	259	685	1.00 (ref)	0.83367	0.998465
			GA	519	514	1.05 (0.89,1.24)			333	514	1.13 (0.94,1.37)			186	514	0.94 (0.75,1.18)
			AA	109	97	1.18 (0.88,1.59)			71	97	1.28 (0.91,1.78)			38	97	1.03 (0.68,1.54)
			Additive*	1280	1296	1.07 (0.95,1.21)	0.262832	0.920347	797	1296	1.13 (0.98,1.30)	0.0828336	0.919895	483	1296	0.98 (0.83,1.16)	0.811749	0.9965
			Dominant (GA + AA vs. GG)	1280	1296	1.07 (0.92,1.26)	0.36885	0.908669	797	1296	1.16 (0.97,1.38)	0.110615	0.895653	483	1296	0.95 (0.77,1.18)	0.660541	0.988428
			Recessive (AA vs. GG + GA)	1280	1296	1.15 (0.87,1.54)	0.330094	0.985701	797	1296	1.21 (0.87,1.66)	0.256802	0.99075	483	1296	1.05 (0.71,1.57)	0.79507	0.997105
		rs830998	CC	878	902	1.00 (ref)	0.707712	0.98779	558	902	1.00 (ref)	0.566141	0.995233	320	902	1.00 (ref)	0.724616	0.998465
			CA	446	433	1.06 (0.90,1.25)			280	433	1.05 (0.87,1.26)			166	433	1.07 (0.86,1.34)
			AA	54	49	1.12 (0.75,1.67)			39	49	1.25 (0.81,1.94)			15	49	0.87 (0.48,1.59)
			Additive*	1378	1384	1.06 (0.93,1.21)	0.40568	0.958231	877	1384	1.08 (0.93,1.25)	0.336709	0.95727	501	1384	1.02 (0.85,1.23)	0.836032	0.9965
			Dominant (CA + AA vs. CC)	1378	1384	1.06 (0.91,1.25)	0.43259	0.9134	877	1384	1.07 (0.90,1.28)	0.451899	0.96588	501	1384	1.05 (0.85,1.30)	0.659307	0.988428
			Recessive (AA vs. CC + CA)	1378	1384	1.10 (0.74,1.64)	0.636032	0.999936	877	1384	1.23 (0.80,1.90)	0.350734	0.99075	501	1384	0.85 (0.47,1.54)	0.591936	0.997105
		rs831004	AA	487	468	1.00 (ref)	0.157038	0.880643	301	468	1.00 (ref)	0.445271	0.995233	186	468	1.00 (ref)	0.12956	0.921471
			AG	680	719	0.91 (0.77,1.07)			439	719	0.94 (0.78,1.13)			241	719	0.85 (0.68,1.06)
			GG	234	203	1.11 (0.88,1.39)			145	203	1.10 (0.84,1.42)			89	203	1.11 (0.82,1.51)
			Additive*	1401	1390	1.02 (0.92,1.14)	0.70991	0.989375	885	1390	1.02 (0.90,1.16)	0.717949	0.986214	516	1390	1.01 (0.87,1.17)	0.895567	0.9965
			Dominant (AG + GG vs. AA)	1401	1390	0.95 (0.81,1.11)	0.524819	0.939842	885	1390	0.97 (0.81,1.16)	0.757938	0.977938	516	1390	0.91 (0.73,1.12)	0.365769	0.95393
			Recessive (GG vs. AA + AG)	1401	1390	1.17 (0.96,1.44)	0.126349	0.93822	885	1390	1.14 (0.90,1.44)	0.278729	0.99075	516	1390	1.23 (0.93,1.62)	0.149267	0.939462
		rs831005	GG	772	775	1.00 (ref)	0.984037	0.999638	469	775	1.00 (ref)	0.815369	0.995233	303	775	1.00 (ref)	0.446718	0.989593
			GA	510	518	0.99 (0.84,1.16)			335	518	1.05 (0.88,1.26)			175	518	0.88 (0.70,1.09)
			AA	75	76	0.99 (0.71,1.39)			50	76	1.09 (0.74,1.59)			25	76	0.85 (0.53,1.37)
			Additive*	1357	1369	0.99 (0.87,1.12)	0.881937	0.997512	854	1369	1.05 (0.91,1.21)	0.526109	0.981487	503	1369	0.90 (0.75,1.07)	0.221865	0.889865
			Dominant (GA + AA vs. GG)	1357	1369	0.99 (0.85,1.15)	0.861084	0.990522	854	1369	1.06 (0.89,1.26)	0.536083	0.966481	503	1369	0.87 (0.71,1.08)	0.206317	0.918488
			Recessive (AA vs. GG + GA)	1357	1369	1.00 (0.72,1.39)	0.991435	0.999936	854	1369	1.06 (0.73,1.54)	0.74592	0.99075	503	1369	0.89 (0.56,1.43)	0.637896	0.997105
		rs831008	AA	1014	1012	1.00 (ref)	0.957259	0.999638	636	1012	1.00 (ref)	0.801917	0.995233	378	1012	1.00 (ref)	0.36975	0.976459
			AG	352	344	1.02 (0.86,1.21)			220	344	1.01 (0.83,1.24)			132	344	1.04 (0.82,1.32)
			GG	29	30	0.96 (0.57,1.61)			23	30	1.21 (0.69,2.11)			6	30	0.54 (0.22,1.32)
			Additive*	1395	1386	1.01 (0.87,1.17)	0.916588	0.997512	879	1386	1.04 (0.88,1.23)	0.645713	0.984432	516	1386	0.96 (0.78,1.18)	0.701807	0.986837
			Dominant (AG + GG vs. AA)	1395	1386	1.02 (0.86,1.20)	0.858569	0.990522	879	1386	1.03 (0.85,1.25)	0.764187	0.977938	516	1386	1.00 (0.79,1.26)	0.998712	0.998712
			Recessive (GG vs. AA + AG)	1395	1386	0.95 (0.57,1.60)	0.852151	0.999936	879	1386	1.20 (0.69,2.10)	0.516146	0.99075	516	1386	0.54 (0.22,1.31)	0.169712	0.939462
		rs831011	GG	842	829	1.00 (ref)	0.944734	0.999638	516	829	1.00 (ref)	0.761708	0.995233	326	829	1.00 (ref)	0.587183	0.998465
			GA	491	490	0.99 (0.84,1.16)			321	490	1.05 (0.87,1.25)			170	490	0.90 (0.72,1.12)
			AA	63	59	1.05 (0.72,1.52)			42	59	1.14 (0.75,1.73)			21	59	0.88 (0.52,1.48)
			Additive*	1396	1378	1.00 (0.88,1.14)	0.985475	0.999735	879	1378	1.06 (0.91,1.22)	0.472678	0.981487	517	1378	0.91 (0.76,1.09)	0.321696	0.925584
			Dominant (GA + AA vs. GG)	1396	1378	0.99 (0.85,1.16)	0.92189	0.992475	879	1378	1.06 (0.89,1.26)	0.537932	0.966481	517	1378	0.89 (0.72,1.11)	0.30311	0.942545
			Recessive (AA vs. GG + GA)	1396	1378	1.05 (0.73,1.52)	0.775374	0.999936	879	1378	1.12 (0.75,1.69)	0.58002	0.99075	517	1378	0.92 (0.55,1.53)	0.73658	0.997105
		rs831012	AA	638	628	1.00 (ref)	0.903704	0.998205	394	628	1.00 (ref)	0.873826	0.995233	244	628	1.00 (ref)	0.787513	0.998465
			AG	589	604	0.97 (0.82,1.13)			368	604	0.96 (0.80,1.16)			221	604	0.98 (0.79,1.22)
			GG	137	139	0.97 (0.75,1.26)			89	139	1.03 (0.77,1.39)			48	139	0.88 (0.61,1.27)
			Additive*	1364	1371	0.98 (0.87,1.10)	0.697497	0.988751	851	1371	1.00 (0.87,1.14)	0.963738	0.993713	513	1371	0.95 (0.81,1.12)	0.551936	0.969597
			Dominant (AG + GG vs. AA)	1364	1371	0.97 (0.83,1.12)	0.653673	0.965622	851	1371	0.98 (0.82,1.16)	0.789183	0.977938	513	1371	0.96 (0.78,1.18)	0.701853	0.988428
			Recessive (GG vs. AA + AG)	1364	1371	0.99 (0.77,1.27)	0.914745	0.999936	851	1371	1.05 (0.79,1.40)	0.733737	0.99075	513	1371	0.89 (0.63,1.26)	0.504992	0.997105
		rs831017	GG	510	497	1.00 (ref)	0.869583	0.998205	326	497	1.00 (ref)	0.782981	0.995233	184	497	1.00 (ref)	0.940731	0.998465
			GA	655	663	0.96 (0.81,1.13)			410	663	0.94 (0.77,1.13)			245	663	1.00 (0.80,1.26)
			AA	186	189	0.96 (0.75,1.21)			118	189	0.96 (0.73,1.26)			68	189	0.95 (0.68,1.32)
			Additive*	1351	1349	0.97 (0.87,1.09)	0.634764	0.988751	854	1349	0.97 (0.85,1.10)	0.625865	0.984164	497	1349	0.98 (0.84,1.15)	0.813872	0.9965
			Dominant (GA + AA vs. GG)	1351	1349	0.96 (0.82,1.12)	0.597536	0.963936	854	1349	0.94 (0.79,1.12)	0.503251	0.966481	497	1349	0.99 (0.80,1.23)	0.936917	0.997191
			Recessive (AA vs. GG + GA)	1351	1349	0.98 (0.79,1.22)	0.848663	0.999936	854	1349	1.00 (0.78,1.28)	0.98612	0.999227	497	1349	0.95 (0.70,1.28)	0.727655	0.997105
		rs831022	GG	536	542	1.00 (ref)	0.570368	0.972276	334	542	1.00 (ref)	0.753533	0.995233	202	542	1.00 (ref)	0.6201	0.998465
			GA	595	587	1.02 (0.86,1.20)			373	587	1.02 (0.85,1.24)			222	587	1.02 (0.81,1.28)
			AA	112	129	0.88 (0.66,1.16)			71	129	0.91 (0.66,1.25)			41	129	0.84 (0.57,1.24)
			Additive*	1243	1258	0.97 (0.86,1.09)	0.587847	0.988751	778	1258	0.98 (0.85,1.13)	0.76458	0.986214	465	1258	0.95 (0.81,1.13)	0.585828	0.975107
			Dominant (GA + AA vs. GG)	1243	1258	0.99 (0.85,1.16)	0.929558	0.993817	778	1258	1.00 (0.84,1.20)	0.973012	0.994194	465	1258	0.99 (0.79,1.23)	0.895849	0.993345
			Recessive (AA vs. GG + GA)	1243	1258	0.87 (0.66,1.13)	0.29999	0.983289	778	1258	0.89 (0.66,1.22)	0.478177	0.99075	465	1258	0.83 (0.57,1.21)	0.334857	0.986454
		rs831041	AA	411	426	1.00 (ref)	0.321593	0.945666	244	426	1.00 (ref)	0.227645	0.977232	167	426	1.00 (ref)	0.296496	0.975592
			AC	719	681	1.10 (0.92,1.30)			460	681	1.19 (0.97,1.45)			259	681	0.96 (0.76,1.22)
			CC	278	301	0.95 (0.77,1.18)			186	301	1.07 (0.84,1.36)			92	301	0.80 (0.59,1.07)
			Additive*	1408	1408	0.99 (0.89,1.10)	0.815749	0.997512	890	1408	1.04 (0.93,1.18)	0.487202	0.981487	518	1408	0.90 (0.78,1.04)	0.1638	0.882838
			Dominant (AC + CC vs. AA)	1408	1408	1.05 (0.89,1.24)	0.540497	0.939842	890	1408	1.15 (0.95,1.39)	0.149116	0.944491	518	1408	0.91 (0.73,1.14)	0.425213	0.964065
			Recessive (CC vs. AA + AC)	1408	1408	0.90 (0.75,1.08)	0.272646	0.979605	890	1408	0.96 (0.78,1.18)	0.686305	0.99075	518	1408	0.81 (0.63,1.06)	0.126179	0.939462
		rs831044	AA	540	553	1.00 (ref)	0.864684	0.998205	320	553	1.00 (ref)	0.272615	0.995233	220	553	1.00 (ref)	0.355731	0.975879
			AT	680	665	1.05 (0.89,1.23)			440	665	1.14 (0.95,1.37)			240	665	0.91 (0.73,1.13)
			TT	191	190	1.03 (0.81,1.30)			133	190	1.19 (0.92,1.55)			58	190	0.79 (0.56,1.11)
			Additive*	1411	1408	1.02 (0.92,1.14)	0.698319	0.988844	893	1408	1.10 (0.97,1.25)	0.120856	0.919895	518	1408	0.89 (0.77,1.04)	0.15333	0.882838
			Dominant (AT + TT vs. AA)	1411	1408	1.04 (0.89,1.21)	0.603093	0.963936	893	1408	1.15 (0.97,1.37)	0.116544	0.895653	518	1408	0.88 (0.72,1.09)	0.238472	0.930396
			Recessive (TT vs. AA + AT)	1411	1408	1.00 (0.81,1.25)	0.978363	0.999936	893	1408	1.11 (0.87,1.41)	0.397814	0.99075	518	1408	0.83 (0.61,1.14)	0.250513	0.953598
		rs853988	CC	396	381	1.00 (ref)	0.770158	0.998205	245	381	1.00 (ref)	0.744894	0.995233	151	381	1.00 (ref)	0.712378	0.998465
			CA	703	704	0.96 (0.80,1.14)			454	704	0.99 (0.81,1.21)			249	704	0.90 (0.71,1.15)
			AA	283	295	0.92 (0.74,1.15)			177	295	0.91 (0.71,1.17)			106	295	0.94 (0.70,1.26)
			Additive*	1382	1380	0.96 (0.86,1.07)	0.46999	0.958231	876	1380	0.96 (0.85,1.08)	0.500992	0.981487	506	1380	0.96 (0.83,1.12)	0.623923	0.975107
			Dominant (CA + AA vs. CC)	1382	1380	0.95 (0.80,1.12)	0.540908	0.939842	876	1380	0.97 (0.80,1.17)	0.724071	0.977938	506	1380	0.91 (0.73,1.15)	0.438882	0.964065
			Recessive (AA vs. CC + CA)	1382	1380	0.95 (0.79,1.14)	0.575065	0.999936	876	1380	0.92 (0.75,1.14)	0.448374	0.99075	506	1380	1.00 (0.78,1.29)	0.987633	0.997105
		rs9789747	AA	917	935	1.00 (ref)	0.129002	0.871526	582	935	1.00 (ref)	0.396043	0.995233	335	935	1.00 (ref)	0.108948	0.901238
			AG	417	430	0.99 (0.84,1.17)			265	430	0.98 (0.82,1.18)			152	430	1.01 (0.80,1.26)
			GG	65	44	1.49 (1.01,2.22)			38	44	1.35 (0.86,2.12)			27	44	1.71 (1.03,2.83)
			Additive*	1399	1409	1.08 (0.94,1.23)	0.2623	0.920347	885	1409	1.05 (0.90,1.22)	0.53913	0.981487	514	1409	1.12 (0.94,1.35)	0.208044	0.882838
			Dominant (AG + GG vs. AA)	1399	1409	1.04 (0.89,1.22)	0.62016	0.963936	885	1409	1.02 (0.85,1.22)	0.85235	0.983582	514	1409	1.07 (0.86,1.33)	0.529877	0.965378
			Recessive (GG vs. AA + AG)	1399	1409	1.50 (1.01,2.22)	0.0431519	0.89806	885	1409	1.36 (0.87,2.12)	0.177538	0.99075	514	1409	1.71 (1.04,2.81)	0.0352738	0.939462
	CUBN	rs1033765	AA	1067	1078	1.00 (ref)	0.736011	0.995381	657	1078	1.00 (ref)	0.487034	0.995233	410	1078	1.00 (ref)	0.444855	0.988558
			AC	280	266	1.06 (0.88,1.28)			187	266	1.14 (0.92,1.41)			93	266	0.94 (0.72,1.23)
			CC	20	23	0.87 (0.47,1.60)			15	23	1.06 (0.55,2.06)			5	23	0.54 (0.20,1.46)
			Additive*	1367	1367	1.03 (0.87,1.21)	0.765552	0.996837	859	1367	1.11 (0.92,1.33)	0.279219	0.95727	508	1367	0.89 (0.70,1.12)	0.32224	0.925584
			Dominant (AC + CC vs. AA)	1367	1367	1.05 (0.87,1.26)	0.632106	0.963936	859	1367	1.13 (0.92,1.39)	0.237264	0.954412	508	1367	0.91 (0.70,1.18)	0.460389	0.965378
			Recessive (CC vs. AA + AC)	1367	1367	0.86 (0.47,1.58)	0.62693	0.999936	859	1367	1.03 (0.53,2.00)	0.924284	0.999227	508	1367	0.55 (0.21,1.47)	0.235129	0.953598
		rs10508518	AA	686	691	1.00 (ref)	0.859161	0.998205	433	691	1.00 (ref)	0.921849	0.995233	253	691	1.00 (ref)	0.788528	0.998465
			AC	557	548	1.03 (0.88,1.21)			344	548	1.04 (0.86,1.25)			213	548	1.03 (0.83,1.29)
			CC	128	134	0.97 (0.74,1.26)			83	134	1.01 (0.75,1.37)			45	134	0.91 (0.62,1.32)
			Additive*	1371	1373	1.00 (0.89,1.12)	0.96851	0.99756	860	1373	1.02 (0.89,1.16)	0.797274	0.989836	511	1373	0.98 (0.84,1.15)	0.833178	0.9965
			Dominant (AC + CC vs. AA)	1371	1373	1.02 (0.88,1.19)	0.788036	0.984668	860	1373	1.03 (0.87,1.23)	0.715386	0.977938	511	1373	1.01 (0.82,1.24)	0.928597	0.994817
			Recessive (CC vs. AA + AC)	1371	1373	0.95 (0.74,1.23)	0.71404	0.999936	860	1373	0.99 (0.74,1.33)	0.967032	0.999227	511	1373	0.89 (0.62,1.28)	0.536026	0.997105
		rs10752062	AA	669	654	1.00 (ref)	0.877136	0.998205	426	654	1.00 (ref)	0.688245	0.995233	243	654	1.00 (ref)	0.755478	0.998465
			AG	541	542	0.97 (0.82,1.14)			332	542	0.92 (0.77,1.11)			209	542	1.06 (0.85,1.32)
			GG	129	121	1.03 (0.78,1.35)			79	121	0.96 (0.70,1.31)			50	121	1.13 (0.78,1.64)
			Additive*	1339	1317	1.00 (0.89,1.12)	0.953419	0.997512	837	1317	0.96 (0.83,1.09)	0.508605	0.981487	502	1317	1.06 (0.91,1.25)	0.454522	0.925584
			Dominant (AG + GG vs. AA)	1339	1317	0.98 (0.84,1.14)	0.7878	0.984668	837	1317	0.93 (0.78,1.11)	0.403787	0.95596	502	1317	1.07 (0.87,1.32)	0.50924	0.965378
			Recessive (GG vs. AA + AG)	1339	1317	1.05 (0.80,1.36)	0.742121	0.999936	837	1317	0.99 (0.73,1.34)	0.960574	0.999227	502	1317	1.10 (0.77,1.57)	0.588169	0.997105
		rs10795433	AA	934	985	1.00 (ref)	0.202401	0.903158	587	985	1.00 (ref)	0.20772	0.977232	347	985	1.00 (ref)	0.393049	0.981696
			AC	421	385	1.15 (0.98,1.36)			275	385	1.18 (0.98,1.43)			146	385	1.10 (0.87,1.38)
			CC	44	39	1.19 (0.77,1.86)			26	39	1.08 (0.65,1.80)			18	39	1.43 (0.80,2.57)
			Additive*	1399	1409	1.13 (0.98,1.30)	0.081722	0.893705	888	1409	1.13 (0.97,1.33)	0.122083	0.919895	511	1409	1.13 (0.93,1.37)	0.206601	0.882838
			Dominant (AC + CC vs. AA)	1399	1409	1.16 (0.99,1.36)	0.0749112	0.876046	888	1409	1.18 (0.98,1.41)	0.082353	0.895653	511	1409	1.12 (0.90,1.40)	0.297536	0.942545
			Recessive (CC vs. AA + AC)	1399	1409	1.14 (0.74,1.77)	0.554404	0.999936	888	1409	1.02 (0.61,1.70)	0.935111	0.999227	511	1409	1.39 (0.78,2.49)	0.261794	0.973277
		rs10795440	AA	957	930	1.00 (ref)	0.702474	0.98779	611	930	1.00 (ref)	0.578815	0.995233	346	930	1.00 (ref)	0.986783	0.998465
			AG	380	397	0.93 (0.79,1.11)			232	397	0.91 (0.75,1.10)			148	397	0.98 (0.78,1.24)
			GG	58	62	0.93 (0.64,1.34)			35	62	0.89 (0.58,1.37)			23	62	1.00 (0.60,1.65)
			Additive*	1395	1389	0.95 (0.83,1.08)	0.422213	0.958231	878	1389	0.92 (0.79,1.08)	0.310509	0.95727	517	1389	0.99 (0.82,1.19)	0.900736	0.9965
			Dominant (AG + GG vs. AA)	1395	1389	0.93 (0.79,1.10)	0.401323	0.909444	878	1389	0.91 (0.75,1.09)	0.29839	0.95596	517	1389	0.98 (0.79,1.23)	0.877921	0.988428
			Recessive (GG vs. AA + AG)	1395	1389	0.95 (0.65,1.37)	0.767977	0.999936	878	1389	0.91 (0.59,1.40)	0.673376	0.99075	517	1389	1.00 (0.61,1.65)	0.994661	0.997759
		rs10795445	AA	1037	1074	1.00 (ref)	0.211762	0.903158	642	1074	1.00 (ref)	0.0737843	0.822179	395	1074	1.00 (ref)	0.920497	0.998465
			AG	343	304	1.17 (0.98,1.40)			231	304	1.26 (1.03,1.54)			112	304	1.02 (0.80,1.31)
			GG	32	33	0.99 (0.61,1.63)			21	33	1.04 (0.59,1.83)			11	33	0.88 (0.44,1.77)
			Additive*	1412	1411	1.11 (0.96,1.29)	0.164248	0.916293	894	1411	1.18 (0.99,1.39)	0.0577075	0.86694	518	1411	0.99 (0.80,1.22)	0.942838	0.9965
			Dominant (AG + GG vs. AA)	1412	1411	1.15 (0.97,1.37)	0.0995976	0.876046	894	1411	1.24 (1.02,1.50)	0.0286968	0.799134	518	1411	1.01 (0.79,1.28)	0.959914	0.998034
			Recessive (GG vs. AA + AG)	1412	1411	0.96 (0.58,1.57)	0.862144	0.999936	894	1411	0.98 (0.56,1.72)	0.954476	0.999227	518	1411	0.88 (0.44,1.76)	0.708139	0.997105
		rs10904824	GG	1127	1160	1.00 (ref)	0.202786	0.903158	715	1160	1.00 (ref)	0.257381	0.99	412	1160	1.00 (ref)	0.424561	0.981696
			GA	278	241	1.19 (0.98,1.44)			177	241	1.19 (0.96,1.48)			101	241	1.17 (0.90,1.53)
			AA	12	12	1.03 (0.46,2.32)			6	12	0.81 (0.30,2.18)			6	12	1.34 (0.50,3.64)
			Additive*	1417	1413	1.16 (0.97,1.38)	0.100839	0.893705	898	1413	1.14 (0.93,1.39)	0.206022	0.919895	519	1413	1.17 (0.92,1.48)	0.190704	0.882838
			Dominant (GA + AA vs. GG)	1417	1413	1.18 (0.98,1.43)	0.0793954	0.876046	898	1413	1.17 (0.95,1.45)	0.145183	0.944491	519	1413	1.18 (0.92,1.53)	0.199777	0.918488
			Recessive (AA vs. GG + GA)	1417	1413	1.00 (0.45,2.24)	0.999711	0.999936	898	1413	0.78 (0.29,2.10)	0.622258	0.99075	519	1413	1.31 (0.48,3.54)	0.599901	0.997105
		rs10904833	CC	422	385	1.00 (ref)	0.366118	0.95768	264	385	1.00 (ref)	0.611598	0.995233	158	385	1.00 (ref)	0.350079	0.975592
			CA	673	698	0.88 (0.74,1.05)			430	698	0.90 (0.74,1.10)			243	698	0.84 (0.66,1.06)
			AA	310	307	0.93 (0.75,1.14)			196	307	0.94 (0.74,1.20)			114	307	0.89 (0.67,1.19)
			Additive*	1405	1390	0.96 (0.86,1.06)	0.406689	0.958231	890	1390	0.96 (0.86,1.09)	0.560242	0.981487	515	1390	0.94 (0.81,1.08)	0.369684	0.925584
			Dominant (CA + AA vs. CC)	1405	1390	0.89 (0.76,1.05)	0.185209	0.908669	890	1390	0.91 (0.76,1.10)	0.353098	0.95596	515	1390	0.85 (0.68,1.07)	0.168762	0.895508
			Recessive (AA vs. CC + CA)	1405	1390	1.00 (0.84,1.20)	0.978519	0.999936	890	1390	1.00 (0.82,1.23)	0.986184	0.999227	515	1390	1.00 (0.78,1.28)	0.972394	0.997105
		rs10904839	AA	912	889	1.00 (ref)	0.778048	0.998205	553	889	1.00 (ref)	0.660554	0.995233	359	889	1.00 (ref)	0.0241148	0.808155
			AG	436	451	0.95 (0.81,1.12)			295	451	1.07 (0.89,1.28)			141	451	0.77 (0.62,0.98)
			GG	60	63	0.93 (0.64,1.34)			46	63	1.14 (0.77,1.70)			14	63	0.56 (0.31,1.02)
			Additive*	1408	1403	0.95 (0.84,1.09)	0.4875	0.958231	894	1403	1.07 (0.93,1.24)	0.36246	0.961096	514	1403	0.77 (0.63,0.93)	0.00627261	0.38718
			Dominant (AG + GG vs. AA)	1408	1403	0.95 (0.81,1.10)	0.48358	0.922043	894	1403	1.08 (0.91,1.29)	0.394437	0.95596	514	1403	0.75 (0.60,0.93)	0.0105095	0.479525
			Recessive (GG vs. AA + AG)	1408	1403	0.95 (0.66,1.36)	0.762677	0.999936	894	1403	1.12 (0.75,1.66)	0.577377	0.99075	514	1403	0.61 (0.34,1.10)	0.101307	0.939462
		rs10904851	GG	666	630	1.00 (ref)	0.341278	0.955592	409	630	1.00 (ref)	0.769755	0.995233	257	630	1.00 (ref)	0.123349	0.921471
			GA	584	595	0.94 (0.80,1.10)			375	595	0.99 (0.82,1.18)			209	595	0.84 (0.68,1.05)
			AA	134	152	0.83 (0.64,1.08)			89	152	0.90 (0.67,1.20)			45	152	0.72 (0.50,1.05)
			Additive*	1384	1377	0.92 (0.82,1.03)	0.150175	0.896251	873	1377	0.96 (0.85,1.09)	0.552038	0.981487	511	1377	0.85 (0.72,0.99)	0.0412662	0.663953
			Dominant (GA + AA vs. GG)	1384	1377	0.91 (0.79,1.06)	0.24189	0.908669	873	1377	0.97 (0.82,1.15)	0.724924	0.977938	511	1377	0.82 (0.66,1.01)	0.0576063	0.750475
			Recessive (AA vs. GG + GA)	1384	1377	0.86 (0.67,1.10)	0.22606	0.962349	873	1377	0.90 (0.68,1.19)	0.476642	0.99075	511	1377	0.79 (0.55,1.12)	0.185642	0.939462
		rs10904855	AA	701	700	1.00 (ref)	0.747122	0.995381	446	700	1.00 (ref)	0.697489	0.995233	255	700	1.00 (ref)	0.857717	0.998465
			AG	578	590	0.98 (0.84,1.14)			360	590	0.95 (0.80,1.14)			218	590	1.04 (0.84,1.29)
			GG	126	115	1.09 (0.83,1.44)			82	115	1.08 (0.79,1.47)			44	115	1.10 (0.75,1.62)
			Additive*	1405	1405	1.02 (0.91,1.14)	0.770918	0.996837	888	1405	1.00 (0.88,1.14)	0.962942	0.993713	517	1405	1.05 (0.89,1.23)	0.586242	0.975107
			Dominant (AG + GG vs. AA)	1405	1405	1.00 (0.86,1.16)	0.978503	0.993817	888	1405	0.97 (0.82,1.15)	0.757309	0.977938	517	1405	1.05 (0.85,1.29)	0.649978	0.988428
			Recessive (GG vs. AA + AG)	1405	1405	1.10 (0.85,1.44)	0.472888	0.999936	888	1405	1.11 (0.82,1.49)	0.511447	0.99075	517	1405	1.09 (0.75,1.57)	0.661147	0.997105
		rs10904861	GG	651	615	1.00 (ref)	0.471418	0.95768	407	615	1.00 (ref)	0.582726	0.995233	244	615	1.00 (ref)	0.318777	0.975592
			GA	585	615	0.91 (0.77,1.06)			367	615	0.92 (0.77,1.11)			218	615	0.87 (0.70,1.08)
			AA	157	155	0.96 (0.75,1.23)			106	155	1.05 (0.79,1.38)			51	155	0.81 (0.57,1.16)
			Additive*	1393	1385	0.96 (0.85,1.07)	0.422996	0.958231	880	1385	0.99 (0.87,1.12)	0.887791	0.990677	513	1385	0.89 (0.76,1.04)	0.141468	0.882838
			Dominant (GA + AA vs. GG)	1393	1385	0.92 (0.79,1.07)	0.258043	0.908669	880	1385	0.95 (0.80,1.13)	0.556883	0.966481	513	1385	0.86 (0.69,1.05)	0.140788	0.876235
			Recessive (AA vs. GG + GA)	1393	1385	1.01 (0.80,1.28)	0.937917	0.999936	880	1385	1.09 (0.83,1.42)	0.539046	0.99075	513	1385	0.87 (0.62,1.22)	0.430723	0.986454
		rs10904865	AA	1228	1209	1.00 (ref)	0.380684	0.95768	766	1209	1.00 (ref)	0.955171	0.995233	462	1209	1.00 (ref)	0.0501075	0.881742
			AG	161	181	0.87 (0.70,1.10)			113	181	0.99 (0.76,1.27)			48	181	0.68 (0.48,0.95)
			GG	10	7	1.44 (0.55,3.81)			5	7	1.18 (0.37,3.77)			5	7	1.71 (0.53,5.49)
			Additive*	1399	1397	0.92 (0.75,1.14)	0.459887	0.958231	884	1397	1.00 (0.79,1.27)	0.991032	0.997135	515	1397	0.78 (0.58,1.05)	0.106176	0.82365
			Dominant (AG + GG vs. AA)	1399	1397	0.90 (0.72,1.12)	0.330436	0.908669	884	1397	0.99 (0.77,1.28)	0.961234	0.994194	515	1397	0.72 (0.52,1.00)	0.0474023	0.732425
			Recessive (GG vs. AA + AG)	1399	1397	1.47 (0.56,3.88)	0.439237	0.999936	884	1397	1.18 (0.37,3.77)	0.775704	0.99075	515	1397	1.79 (0.56,5.74)	0.326095	0.986454
		rs10904881	CC	479	468	1.00 (ref)	0.856964	0.998205	303	468	1.00 (ref)	0.728479	0.995233	176	468	1.00 (ref)	0.913317	0.998465
			CA	689	689	0.97 (0.83,1.15)			441	689	0.99 (0.82,1.20)			248	689	0.96 (0.76,1.20)
			AA	243	252	0.94 (0.76,1.17)			147	252	0.91 (0.71,1.17)			96	252	1.00 (0.74,1.35)
			Additive*	1411	1409	0.97 (0.87,1.08)	0.581467	0.988751	891	1409	0.96 (0.85,1.08)	0.503006	0.981487	520	1409	0.99 (0.86,1.15)	0.932517	0.9965
			Dominant (CA + AA vs. CC)	1411	1409	0.97 (0.83,1.13)	0.662459	0.965622	891	1409	0.97 (0.81,1.16)	0.724906	0.977938	520	1409	0.97 (0.78,1.20)	0.772786	0.988428
			Recessive (AA vs. CC + CA)	1411	1409	0.95 (0.79,1.16)	0.639348	0.999936	891	1409	0.91 (0.73,1.14)	0.429711	0.99075	520	1409	1.03 (0.79,1.34)	0.841934	0.997105
		rs10904883	CC	624	640	1.00 (ref)	0.713924	0.98779	390	640	1.00 (ref)	0.484675	0.995233	234	640	1.00 (ref)	0.872028	0.998465
			CA	623	619	1.03 (0.88,1.21)			392	619	1.04 (0.87,1.24)			231	619	1.05 (0.85,1.30)
			AA	150	139	1.11 (0.86,1.44)			101	139	1.19 (0.89,1.59)			49	139	0.97 (0.68,1.40)
			Additive*	1397	1398	1.05 (0.93,1.17)	0.426755	0.958231	883	1398	1.07 (0.94,1.22)	0.283868	0.95727	514	1398	1.01 (0.86,1.18)	0.905244	0.9965
			Dominant (CA + AA vs. CC)	1397	1398	1.05 (0.90,1.22)	0.533146	0.939842	883	1398	1.06 (0.90,1.26)	0.471989	0.966481	514	1398	1.04 (0.84,1.27)	0.742648	0.988428
			Recessive (AA vs. CC + CA)	1397	1398	1.09 (0.85,1.39)	0.483389	0.999936	883	1398	1.17 (0.89,1.54)	0.25398	0.99075	514	1398	0.95 (0.67,1.35)	0.773068	0.997105
		rs11254227	GG	1298	1309	1.00 (ref)	0.856215	0.998205	829	1309	1.00 (ref)	0.896119	0.995233	469	1309	1.00 (ref)	0.107488	0.898325
			GC	100	92	1.09 ( 8.100000e-01, 1.460000e+00)			55	92	0.92 ( 6.500000e-01, 1.300000e+00)			45	92	1.36 (0.93,1.99)
			CC	3	0	286726.44 ( 0.000000e+00,8.076809e+164)			3	0	1069756.81 ( 0.000000e+00,6.751064e+267)			0	0	- (-,-)
			Additive*	1401	1401	1.15 (0.86,1.53)	0.340672	0.921861	887	1401	1.02 (0.73,1.42)	0.906875	0.992702	514	1401	1.36 (0.93,1.99)	0.107488	0.824352
			Dominant (GC + CC vs. GG)	1401	1401	1.12 (0.84,1.50)	0.451068	0.913548	887	1401	0.97 (0.69,1.37)	0.856395	0.983582	514	1401	1.36 (0.93,1.99)	0.107488	0.835991
			Recessive (CC vs. GG + GC)	1401	1401	284865.93 ( 0.000000e+00,7.903228e+164)	0.946541	0.999936	887	1401	1075925.73 ( 0.000000e+00,7.147981e+267)	0.963985	0.999227			- (-,-)	-
		rs11254232	AA	1161	1192	1.00 (ref)	0.102517	0.871526	734	1192	1.00 (ref)	0.0678308	0.822179	427	1192	1.00 (ref)	0.598868	0.998465
			AC	244	209	1.20 (0.98,1.48)			157	209	1.23 (0.98,1.55)			87	209	1.15 (0.87,1.52)
			CC	7	12	0.60 (0.23,1.53)			3	12	0.39 (0.11,1.41)			4	12	0.90 (0.29,2.85)
			Additive*	1412	1413	1.12 (0.93,1.36)	0.218826	0.919641	894	1413	1.12 (0.91,1.39)	0.28439	0.95727	518	1413	1.11 (0.86,1.43)	0.420027	0.925584
			Dominant (AC + CC vs. AA)	1412	1413	1.17 (0.96,1.43)	0.118614	0.876046	894	1413	1.18 (0.95,1.48)	0.140892	0.944491	518	1413	1.14 (0.87,1.49)	0.355635	0.95393
			Recessive (CC vs. AA + AC)	1412	1413	0.58 (0.23,1.48)	0.251597	0.976657	894	1413	0.38 (0.11,1.36)	0.135687	0.99075	518	1413	0.88 (0.28,2.78)	0.830526	0.997105
		rs11254237	AA	1266	1295	1.00 (ref)	0.159966	0.880643	806	1295	1.00 (ref)	0.603013	0.995233	460	1295	1.00 (ref)	0.105237	0.898325
			AT	144	116	1.26 (0.98,1.64)			85	116	1.16 (0.86,1.57)			59	116	1.44 (1.03,2.01)
			TT	3	5	0.61 (0.14,2.57)			3	5	0.93 (0.22,3.93)			0	5	0.00 (0.00, Inf)
			Additive*	1413	1416	1.20 (0.94,1.53)	0.148256	0.893705	894	1416	1.13 (0.86,1.49)	0.377515	0.961096	519	1416	1.30 (0.94,1.79)	0.110984	0.838472
			Dominant (AT + TT vs. AA)	1413	1416	1.24 (0.96,1.60)	0.100883	0.876046	894	1416	1.15 (0.86,1.54)	0.337652	0.95596	519	1416	1.38 (0.99,1.93)	0.0584042	0.750475
			Recessive (TT vs. AA + AT)	1413	1416	0.59 (0.14,2.50)	0.478585	0.999936	894	1416	0.91 (0.22,3.87)	0.902092	0.999227	519	1416	0.00 (0.00, Inf)	0.982032	0.997105
		rs11254275	AA	632	653	1.00 (ref)	0.117556	0.871526	394	653	1.00 (ref)	0.145217	0.958809	238	653	1.00 (ref)	0.3721	0.976576
			AG	602	615	1.01 (0.86,1.19)			386	615	1.04 (0.87,1.24)			216	615	0.97 (0.78,1.21)
			GG	180	144	1.29 (1.01,1.65)			116	144	1.32 (1.00,1.74)			64	144	1.23 (0.88,1.72)
			Additive*	1414	1412	1.09 (0.98,1.22)	0.112822	0.893705	896	1412	1.11 (0.98,1.26)	0.0996808	0.919895	518	1412	1.06 (0.91,1.24)	0.41878	0.925584
			Dominant (AG + GG vs. AA)	1414	1412	1.06 (0.92,1.24)	0.411901	0.909444	896	1412	1.09 (0.92,1.29)	0.321355	0.95596	518	1412	1.02 (0.83,1.26)	0.828428	0.988428
			Recessive (GG vs. AA + AG)	1414	1412	1.28 (1.01,1.62)	0.0390551	0.89806	896	1412	1.29 (1.00,1.68)	0.0541571	0.973242	518	1412	1.25 (0.91,1.72)	0.166109	0.939462
		rs11254284	AA	557	590	1.00 (ref)	0.458964	0.95768	359	590	1.00 (ref)	0.737792	0.995233	198	590	1.00 (ref)	0.342587	0.975592
			AG	651	625	1.10 (0.94,1.30)			407	625	1.07 (0.89,1.29)			244	625	1.18 (0.94,1.47)
			GG	199	193	1.09 (0.86,1.37)			125	193	1.07 (0.82,1.39)			74	193	1.13 (0.82,1.56)
			Additive*	1407	1408	1.06 (0.95,1.18)	0.30128	0.921281	891	1408	1.04 (0.92,1.18)	0.492332	0.981487	516	1408	1.09 (0.94,1.27)	0.251173	0.895465
			Dominant (AG + GG vs. AA)	1407	1408	1.10 (0.95,1.28)	0.214263	0.908669	891	1408	1.07 (0.90,1.27)	0.435472	0.9598	516	1408	1.17 (0.95,1.44)	0.149183	0.894412
			Recessive (GG vs. AA + AG)	1407	1408	1.03 (0.83,1.28)	0.771248	0.999936	891	1408	1.03 (0.81,1.32)	0.797545	0.995754	516	1408	1.04 (0.77,1.39)	0.81809	0.997105
		rs11254337	GG	886	894	1.00 (ref)	0.432026	0.95768	545	894	1.00 (ref)	0.511854	0.995233	341	894	1.00 (ref)	0.307061	0.975592
			GA	428	405	1.06 (0.90,1.25)			278	405	1.11 (0.92,1.34)			150	405	0.98 (0.78,1.23)
			AA	33	42	0.79 (0.49,1.26)			24	42	0.92 (0.55,1.55)			9	42	0.56 (0.27,1.17)
			Additive*	1347	1341	1.00 (0.87,1.16)	0.968608	0.99756	847	1341	1.06 (0.90,1.24)	0.493498	0.981487	500	1341	0.91 (0.74,1.10)	0.327996	0.925584
			Dominant (GA + AA vs. GG)	1347	1341	1.04 (0.88,1.22)	0.671307	0.965622	847	1341	1.09 (0.91,1.31)	0.348586	0.95596	500	1341	0.94 (0.75,1.17)	0.566099	0.979074
			Recessive (AA vs. GG + GA)	1347	1341	0.77 (0.48,1.23)	0.276599	0.979605	847	1341	0.89 (0.53,1.50)	0.668615	0.99075	500	1341	0.56 (0.27,1.18)	0.1281	0.939462
		rs11254339	GG	1111	1140	1.00 (ref)	0.201117	0.903158	697	1140	1.00 (ref)	0.175973	0.977232	414	1140	1.00 (ref)	0.641333	0.998465
			GA	271	248	1.12 (0.92,1.36)			183	248	1.18 (0.95,1.47)			88	248	1.02 (0.78,1.34)
			AA	9	16	0.57 (0.25,1.31)			6	16	0.61 (0.23,1.58)			3	16	0.55 (0.16,1.94)
			Additive*	1391	1404	1.05 (0.88,1.25)	0.615684	0.988751	886	1404	1.10 (0.90,1.34)	0.356171	0.961096	505	1404	0.97 (0.75,1.24)	0.792291	0.9965
			Dominant (GA + AA vs. GG)	1391	1404	1.09 (0.90,1.31)	0.384803	0.908669	886	1404	1.15 (0.93,1.42)	0.206337	0.945508	505	1404	0.99 (0.76,1.30)	0.963912	0.998034
			Recessive (AA vs. GG + GA)	1391	1404	0.56 (0.25,1.28)	0.170753	0.948302	886	1404	0.59 (0.23,1.52)	0.273769	0.99075	505	1404	0.55 (0.16,1.93)	0.351856	0.986454
		rs11254351	AA	1220	1229	1.00 (ref)	0.782068	0.998205	765	1229	1.00 (ref)	0.637721	0.995233	455	1229	1.00 (ref)	0.887575	0.998465
			AG	183	176	1.05 (0.84,1.31)			125	176	1.11 (0.86,1.42)			58	176	0.94 (0.68,1.30)
			GG	6	8	0.74 (0.26,2.16)			4	8	0.75 (0.22,2.53)			2	8	0.77 (0.16,3.69)
			Additive*	1409	1413	1.02 (0.83,1.26)	0.852189	0.997512	894	1413	1.07 (0.85,1.35)	0.564648	0.981487	515	1413	0.93 (0.69,1.26)	0.643789	0.975107
			Dominant (AG + GG vs. AA)	1409	1413	1.04 (0.83,1.29)	0.75341	0.977861	894	1413	1.09 (0.86,1.40)	0.475735	0.966481	515	1413	0.93 (0.68,1.28)	0.673087	0.988428
			Recessive (GG vs. AA + AG)	1409	1413	0.74 (0.25,2.14)	0.575038	0.999936	894	1413	0.74 (0.22,2.49)	0.626755	0.99075	515	1413	0.77 (0.16,3.73)	0.750084	0.997105
		rs11254363	AA	719	742	1.00 (ref)	0.317454	0.945666	439	742	1.00 (ref)	0.22855	0.977232	280	742	1.00 (ref)	0.456111	0.992812
			AG	492	505	1.01 (0.85,1.18)			324	505	1.06 (0.88,1.28)			168	505	0.91 (0.73,1.14)
			GG	124	102	1.24 (0.93,1.66)			82	102	1.32 (0.96,1.83)			42	102	1.16 (0.78,1.73)
			Additive*	1335	1349	1.07 (0.95,1.20)	0.28141	0.921281	845	1349	1.11 (0.97,1.28)	0.120965	0.919895	490	1349	1.00 (0.85,1.19)	0.963827	0.9965
			Dominant (AG + GG vs. AA)	1335	1349	1.04 (0.89,1.22)	0.586467	0.959339	845	1349	1.10 (0.93,1.32)	0.268339	0.954412	490	1349	0.95 (0.77,1.18)	0.644557	0.988428
			Recessive (GG vs. AA + AG)	1335	1349	1.24 (0.94,1.64)	0.13016	0.93822	845	1349	1.29 (0.94,1.76)	0.11055	0.99075	490	1349	1.21 (0.82,1.78)	0.335543	0.986454
		rs11254375	AA	682	661	1.00 (ref)	0.410292	0.95768	439	661	1.00 (ref)	0.0550487	0.822179	243	661	1.00 (ref)	0.543563	0.998465
			AC	586	586	0.97 (0.83,1.14)			380	586	1.00 (0.84,1.20)			206	586	0.91 (0.73,1.13)
			CC	136	157	0.84 (0.65,1.09)			69	157	0.69 (0.50,0.95)			67	157	1.07 (0.77,1.48)
			Additive*	1404	1404	0.94 (0.83,1.05)	0.247453	0.919641	888	1404	0.90 (0.78,1.02)	0.0995829	0.919895	516	1404	0.99 (0.85,1.16)	0.93343	0.9965
			Dominant (AC + CC vs. AA)	1404	1404	0.94 (0.81,1.10)	0.456945	0.913548	888	1404	0.94 (0.79,1.12)	0.473683	0.966481	516	1404	0.94 (0.76,1.16)	0.56553	0.979074
			Recessive (CC vs. AA + AC)	1404	1404	0.85 (0.67,1.09)	0.198783	0.958279	888	1404	0.69 (0.51,0.93)	0.0160365	0.827484	516	1404	1.12 (0.82,1.53)	0.481274	0.997105
		rs11254389	GG	948	962	1.00 (ref)	0.855112	0.998205	591	962	1.00 (ref)	0.740189	0.995233	357	962	1.00 (ref)	0.682139	0.998465
			GA	303	320	0.96 (0.80,1.16)			195	320	1.00 (0.81,1.23)			108	320	0.90 (0.70,1.16)
			AA	30	28	1.10 (0.65,1.86)			21	28	1.26 (0.70,2.24)			9	28	0.88 (0.41,1.91)
			Additive*	1281	1310	0.99 (0.85,1.16)	0.901912	0.997512	807	1310	1.04 (0.87,1.24)	0.695552	0.986214	474	1310	0.91 (0.73,1.13)	0.395389	0.925584
			Dominant (GA + AA vs. GG)	1281	1310	0.98 (0.82,1.16)	0.783059	0.98462	807	1310	1.02 (0.83,1.25)	0.857667	0.983582	474	1310	0.90 (0.70,1.15)	0.382214	0.962555
			Recessive (AA vs. GG + GA)	1281	1310	1.11 (0.66,1.88)	0.688556	0.999936	807	1310	1.26 (0.71,2.24)	0.438095	0.99075	474	1310	0.91 (0.42,1.95)	0.799972	0.997105
		rs11591606	GG	922	971	1.00 (ref)	0.0282194	0.737654	579	971	1.00 (ref)	0.0595649	0.822179	343	971	1.00 (ref)	0.111443	0.913299
			GA	460	400	1.21 (1.03,1.43)			294	400	1.24 (1.03,1.49)			166	400	1.17 (0.94,1.46)
			AA	37	49	0.80 (0.51,1.24)			26	49	0.89 (0.55,1.46)			11	49	0.62 (0.31,1.21)
			Additive*	1419	1420	1.09 (0.95,1.26)	0.19643	0.919641	899	1420	1.12 (0.96,1.31)	0.134644	0.919895	520	1420	1.03 (0.86,1.25)	0.740084	0.994061
			Dominant (GA + AA vs. GG)	1419	1420	1.17 (1.00,1.37)	0.051515	0.786327	899	1420	1.20 (1.00,1.43)	0.0455634	0.815773	520	1420	1.11 (0.90,1.38)	0.337829	0.944105
			Recessive (AA vs. GG + GA)	1419	1420	0.75 (0.49,1.16)	0.198404	0.958279	899	1420	0.83 (0.51,1.36)	0.468677	0.99075	520	1420	0.59 (0.30,1.15)	0.121835	0.939462
		rs11591673	GG	762	731	1.00 (ref)	0.545776	0.972276	484	731	1.00 (ref)	0.485206	0.995233	278	731	1.00 (ref)	0.938832	0.998465
			GA	548	573	0.92 (0.78,1.07)			344	573	0.90 (0.75,1.07)			204	573	0.96 (0.78,1.19)
			AA	107	105	0.98 (0.73,1.30)			69	105	0.96 (0.69,1.33)			38	105	1.00 (0.67,1.49)
			Additive*	1417	1409	0.95 (0.85,1.07)	0.440567	0.958231	897	1409	0.94 (0.82,1.08)	0.374191	0.961096	520	1409	0.98 (0.83,1.16)	0.819972	0.9965
			Dominant (GA + AA vs. GG)	1417	1409	0.93 (0.80,1.07)	0.307696	0.908669	897	1409	0.91 (0.76,1.07)	0.254981	0.954412	520	1409	0.97 (0.79,1.19)	0.75112	0.988428
			Recessive (AA vs. GG + GA)	1417	1409	1.01 (0.76,1.34)	0.930923	0.999936	897	1409	1.00 (0.73,1.38)	0.978878	0.999227	520	1409	1.01 (0.68,1.50)	0.952614	0.997105
		rs11591878	GG	1019	1043	1.00 (ref)	0.228373	0.911937	641	1043	1.00 (ref)	0.041719	0.757316	378	1043	1.00 (ref)	0.979582	0.998465
			GA	177	212	0.84 (0.68,1.05)			99	212	0.74 (0.57,0.96)			78	212	1.03 (0.77,1.37)
			AA	14	11	1.36 (0.61,3.05)			10	11	1.57 (0.65,3.80)			4	11	0.94 (0.29,3.05)
			Additive*	1210	1266	0.91 (0.75,1.10)	0.32238	0.921281	750	1266	0.84 (0.66,1.05)	0.12854	0.919895	460	1266	1.02 (0.78,1.32)	0.907845	0.9965
			Dominant (GA + AA vs. GG)	1210	1266	0.87 (0.70,1.07)	0.195359	0.908669	750	1266	0.78 (0.60,1.00)	0.0502276	0.847884	460	1266	1.02 (0.77,1.36)	0.880634	0.988428
			Recessive (AA vs. GG + GA)	1210	1266	1.40 (0.62,3.13)	0.416375	0.999936	750	1266	1.64 (0.68,3.98)	0.26954	0.99075	460	1266	0.94 (0.29,3.03)	0.917548	0.997105
		rs11592014	CC	518	504	1.00 (ref)	0.872511	0.998205	329	504	1.00 (ref)	0.923512	0.995233	189	504	1.00 (ref)	0.888344	0.998465
			CA	668	683	0.96 (0.81,1.13)			424	683	0.96 (0.80,1.16)			244	683	0.96 (0.76,1.20)
			AA	220	217	0.99 (0.79,1.24)			135	217	0.97 (0.75,1.26)			85	217	1.02 (0.75,1.39)
			Additive*	1406	1404	0.99 (0.89,1.10)	0.833416	0.997512	888	1404	0.98 (0.87,1.11)	0.76768	0.986214	518	1404	1.00 (0.86,1.16)	0.995247	0.996712
			Dominant (CA + AA vs. CC)	1406	1404	0.97 (0.83,1.13)	0.674396	0.965622	888	1404	0.97 (0.81,1.15)	0.696935	0.977938	518	1404	0.97 (0.79,1.21)	0.811498	0.988428
			Recessive (AA vs. CC + CA)	1406	1404	1.02 (0.83,1.25)	0.874913	0.999936	888	1404	0.99 (0.79,1.26)	0.965264	0.999227	518	1404	1.05 (0.79,1.38)	0.746674	0.997105
		rs11595961	CC	1199	1251	1.00 (ref)	0.708642	0.98779	753	1251	1.00 (ref)	0.487471	0.995233	446	1251	1.00 (ref)	0.921191	0.998465
			CA	106	125	0.89 (0.68,1.17)			66	125	0.86 (0.63,1.18)			40	125	0.93 (0.63,1.35)
			AA	3	3	1.09 (0.21,5.56)			3	3	1.89 (0.37,9.72)			0	3	0.00 (0.00, Inf)
			Additive*	1308	1379	0.91 (0.70,1.17)	0.45539	0.958231	822	1379	0.91 (0.68,1.23)	0.544877	0.981487	486	1379	0.88 (0.61,1.27)	0.490513	0.957568
			Dominant (CA + AA vs. CC)	1308	1379	0.90 (0.68,1.17)	0.427031	0.909564	822	1379	0.88 (0.65,1.21)	0.439444	0.96403	486	1379	0.90 (0.62,1.31)	0.584926	0.983065
			Recessive (AA vs. CC + CA)	1308	1379	1.11 (0.22,5.64)	0.902789	0.999936	822	1379	1.92 (0.37,9.86)	0.43588	0.99075	486	1379	0.00 (0.00, Inf)	0.978509	0.997105
		rs11814420	AA	358	386	1.00 (ref)	0.101949	0.871526	238	386	1.00 (ref)	0.455707	0.995233	120	386	1.00 (ref)	0.0183811	0.775433
			AG	689	712	1.04 (0.87,1.25)			435	712	0.98 (0.80,1.20)			254	712	1.17 (0.91,1.51)
			GG	358	311	1.24 (1.00,1.53)			216	311	1.12 (0.88,1.42)			142	311	1.51 (1.13,2.03)
			Additive*	1405	1409	1.11 (1.00,1.23)	0.0513979	0.847705	889	1409	1.06 (0.94,1.19)	0.38006	0.961096	516	1409	1.23 (1.06,1.43)	0.00561072	0.385959
			Dominant (AG + GG vs. AA)	1405	1409	1.10 (0.93,1.30)	0.269814	0.908669	889	1409	1.02 (0.84,1.24)	0.825102	0.977938	516	1409	1.27 (1.00,1.61)	0.0508805	0.744569
			Recessive (GG vs. AA + AG)	1405	1409	1.21 (1.01,1.44)	0.0364372	0.89806	889	1409	1.14 (0.93,1.39)	0.215715	0.99075	516	1409	1.36 (1.08,1.73)	0.0101704	0.939462
		rs12146272	CC	467	469	1.00 (ref)	0.141024	0.878684	292	469	1.00 (ref)	0.230196	0.977232	175	469	1.00 (ref)	0.285647	0.975592
			CG	659	702	0.94 (0.80,1.11)			423	702	0.96 (0.79,1.16)			236	702	0.94 (0.74,1.18)
			GG	277	240	1.16 (0.93,1.44)			176	240	1.17 (0.92,1.50)			101	240	1.17 (0.87,1.57)
			Additive*	1403	1411	1.06 (0.95,1.17)	0.315726	0.921281	891	1411	1.06 (0.94,1.20)	0.323814	0.95727	512	1411	1.06 (0.92,1.23)	0.435456	0.925584
			Dominant (CG + GG vs. CC)	1403	1411	1.00 (0.85,1.17)	0.977143	0.993817	891	1411	1.01 (0.84,1.21)	0.908661	0.986395	512	1411	1.00 (0.80,1.24)	0.966374	0.998034
			Recessive (GG vs. CC + CG)	1403	1411	1.20 (0.99,1.45)	0.0634829	0.916218	891	1411	1.20 (0.97,1.49)	0.0984972	0.99075	512	1411	1.22 (0.94,1.58)	0.138892	0.939462
		rs12243365	CC	916	862	1.00 (ref)	0.309024	0.945666	589	862	1.00 (ref)	0.238567	0.977232	327	862	1.00 (ref)	0.672613	0.998465
			CA	420	443	0.89 (0.76,1.05)			261	443	0.87 (0.72,1.04)			159	443	0.91 (0.72,1.13)
			AA	58	64	0.85 (0.59,1.23)			34	64	0.81 (0.52,1.25)			24	64	0.91 (0.56,1.50)
			Additive*	1394	1369	0.90 (0.79,1.03)	0.133005	0.893705	884	1369	0.88 (0.75,1.02)	0.0955028	0.919895	510	1369	0.93 (0.77,1.11)	0.411725	0.925584
			Dominant (CA + AA vs. CC)	1394	1369	0.89 (0.76,1.04)	0.129938	0.878304	884	1369	0.86 (0.72,1.03)	0.0954701	0.895653	510	1369	0.91 (0.73,1.12)	0.37347	0.959263
			Recessive (AA vs. CC + CA)	1394	1369	0.88 (0.61,1.28)	0.511658	0.999936	884	1369	0.85 (0.55,1.30)	0.454244	0.99075	510	1369	0.95 (0.58,1.54)	0.822328	0.997105
		rs12243895	GG	702	767	1.00 (ref)	0.00907981	0.569075	435	767	1.00 (ref)	0.0061537	0.508989	267	767	1.00 (ref)	0.261024	0.968615
			GA	551	513	1.18 (1.00,1.38)			354	513	1.20 (1.00,1.44)			197	513	1.12 (0.90,1.40)
			AA	140	104	1.48 (1.12,1.96)			94	104	1.59 (1.17,2.16)			46	104	1.34 (0.91,1.97)
			Additive*	1393	1384	1.20 (1.07,1.35)	0.00230974	0.274439	883	1384	1.24 (1.08,1.41)	0.00158783	0.254463	510	1384	1.14 (0.97,1.34)	0.105572	0.82365
			Dominant (GA + AA vs. GG)	1393	1384	1.22 (1.05,1.43)	0.00867165	0.560589	883	1384	1.27 (1.07,1.50)	0.00742207	0.570626	510	1384	1.16 (0.94,1.43)	0.168898	0.895508
			Recessive (AA vs. GG + GA)	1393	1384	1.38 (1.05,1.80)	0.019664	0.89806	883	1384	1.46 (1.08,1.97)	0.0127053	0.827484	510	1384	1.27 (0.88,1.85)	0.204167	0.939462
		rs12244831	AA	796	767	1.00 (ref)	0.543481	0.972276	500	767	1.00 (ref)	0.532568	0.995233	296	767	1.00 (ref)	0.391991	0.981696
			AG	500	530	0.91 (0.78,1.07)			314	530	0.93 (0.77,1.11)			186	530	0.89 (0.72,1.11)
			GG	84	82	0.99 (0.72,1.36)			59	82	1.12 (0.78,1.59)			25	82	0.77 (0.48,1.24)
			Additive*	1380	1379	0.95 (0.84,1.08)	0.442404	0.958231	873	1379	0.99 (0.86,1.14)	0.906556	0.992702	507	1379	0.89 (0.74,1.05)	0.17174	0.882838
			Dominant (AG + GG vs. AA)	1380	1379	0.92 (0.79,1.08)	0.312601	0.908669	873	1379	0.95 (0.80,1.13)	0.594554	0.966481	507	1379	0.88 (0.71,1.08)	0.215478	0.918488
			Recessive (GG vs. AA + AG)	1380	1379	1.02 (0.75,1.40)	0.893428	0.999936	873	1379	1.15 (0.81,1.63)	0.431667	0.99075	507	1379	0.81 (0.51,1.28)	0.364196	0.986454
		rs12254816	AA	1094	1088	1.00 (ref)	0.979111	0.999638	691	1088	1.00 (ref)	0.857223	0.995233	403	1088	1.00 (ref)	0.728004	0.998465
			AG	250	246	1.02 (0.84,1.24)			165	246	1.06 (0.85,1.33)			85	246	0.90 (0.68,1.19)
			GG	24	23	1.04 (0.58,1.86)			14	23	0.99 (0.50,1.95)			10	23	1.09 (0.51,2.32)
			Additive*	1368	1357	1.02 (0.86,1.20)	0.837783	0.997512	870	1357	1.04 (0.86,1.26)	0.661096	0.986214	498	1357	0.94 (0.75,1.19)	0.624977	0.975107
			Dominant (AG + GG vs. AA)	1368	1357	1.02 (0.84,1.23)	0.847988	0.98869	870	1357	1.06 (0.85,1.31)	0.606498	0.966699	498	1357	0.92 (0.70,1.19)	0.516678	0.965378
			Recessive (GG vs. AA + AG)	1368	1357	1.04 (0.58,1.85)	0.903343	0.999936	870	1357	0.98 (0.50,1.92)	0.943566	0.999227	498	1357	1.11 (0.52,2.37)	0.78682	0.997105
		rs12255119	GG	881	867	1.00 (ref)	0.419056	0.95768	550	867	1.00 (ref)	0.401624	0.995233	331	867	1.00 (ref)	0.466598	0.993003
			GA	462	488	0.94 (0.80,1.10)			298	488	0.97 (0.81,1.17)			164	488	0.87 (0.70,1.09)
			AA	65	54	1.19 (0.82,1.73)			44	54	1.31 (0.86,1.98)			21	54	1.01 (0.60,1.71)
			Additive*	1408	1409	1.00 (0.88,1.14)	0.961474	0.997512	892	1409	1.04 (0.90,1.21)	0.589175	0.981941	516	1409	0.92 (0.77,1.11)	0.37877	0.925584
			Dominant (GA + AA vs. GG)	1408	1409	0.96 (0.83,1.12)	0.622171	0.963936	892	1409	1.01 (0.85,1.20)	0.931268	0.989504	516	1409	0.89 (0.71,1.10)	0.263468	0.94168
			Recessive (AA vs. GG + GA)	1408	1409	1.22 (0.84,1.77)	0.295631	0.983289	892	1409	1.32 (0.87,1.99)	0.186181	0.99075	516	1409	1.06 (0.63,1.79)	0.826501	0.997105
		rs12258009	GG	1025	1032	1.00 (ref)	0.122198	0.871526	649	1032	1.00 (ref)	0.159189	0.959763	376	1032	1.00 (ref)	0.348125	0.975592
			GA	343	355	0.98 (0.82,1.16)			217	355	0.97 (0.80,1.19)			126	355	1.00 (0.79,1.27)
			AA	45	28	1.64 (1.01,2.65)			29	28	1.66 (0.98,2.84)			16	28	1.59 (0.85,3.00)
			Additive*	1413	1415	1.07 (0.92,1.24)	0.367324	0.940499	895	1415	1.07 (0.91,1.26)	0.418411	0.961096	518	1415	1.08 (0.88,1.32)	0.4567	0.925584
			Dominant (GA + AA vs. GG)	1413	1415	1.03 (0.87,1.21)	0.76378	0.981573	895	1415	1.02 (0.85,1.24)	0.800316	0.977938	518	1415	1.04 (0.83,1.31)	0.728364	0.988428
			Recessive (AA vs. GG + GA)	1413	1415	1.65 (1.02,2.66)	0.04185	0.89806	895	1415	1.67 (0.98,2.85)	0.0573702	0.973242	518	1415	1.60 (0.85,3.00)	0.14633	0.939462
		rs12263745	AA	600	653	1.00 (ref)	0.0511359	0.871526	361	653	1.00 (ref)	0.0167333	0.658643	239	653	1.00 (ref)	0.75133	0.998465
			AG	606	563	1.17 (1.00,1.38)			392	563	1.24 (1.03,1.49)			214	563	1.06 (0.85,1.32)
			GG	185	156	1.29 (1.01,1.65)			123	156	1.40 (1.07,1.85)			62	156	1.12 (0.80,1.58)
			Additive*	1391	1372	1.15 (1.03,1.28)	0.0158465	0.640961	876	1372	1.20 (1.06,1.36)	0.00471184	0.456935	515	1372	1.06 (0.91,1.24)	0.449664	0.925584
			Dominant (AG + GG vs. AA)	1391	1372	1.20 (1.03,1.39)	0.0209411	0.597133	876	1372	1.27 (1.07,1.51)	0.0066576	0.568648	515	1372	1.08 (0.87,1.32)	0.493299	0.965378
			Recessive (GG vs. AA + AG)	1391	1372	1.19 (0.95,1.50)	0.133303	0.93822	876	1372	1.26 (0.97,1.63)	0.0803472	0.973242	515	1372	1.09 (0.79,1.50)	0.597915	0.997105
		rs12414709	GG	1102	1072	1.00 (ref)	0.660682	0.98779	706	1072	1.00 (ref)	0.617175	0.995233	396	1072	1.00 (ref)	0.912629	0.998465
			GA	277	294	0.93 (0.77,1.12)			167	294	0.90 (0.73,1.12)			110	294	0.97 (0.75,1.25)
			AA	21	24	0.86 (0.47,1.56)			13	24	0.86 (0.43,1.71)			8	24	0.86 (0.38,1.96)
			Additive*	1400	1390	0.93 (0.79,1.09)	0.362621	0.940499	886	1390	0.91 (0.75,1.10)	0.330215	0.95727	514	1390	0.96 (0.77,1.19)	0.691442	0.983368
			Dominant (GA + AA vs. GG)	1400	1390	0.92 (0.77,1.11)	0.378653	0.908669	886	1390	0.90 (0.73,1.11)	0.330623	0.95596	514	1390	0.96 (0.75,1.23)	0.734795	0.988428
			Recessive (AA vs. GG + GA)	1400	1390	0.88 (0.48,1.59)	0.665513	0.999936	886	1390	0.88 (0.44,1.75)	0.71596	0.99075	514	1390	0.87 (0.38,1.97)	0.739308	0.997105
		rs12766939	AA	740	758	1.00 (ref)	0.406017	0.95768	459	758	1.00 (ref)	0.147381	0.958809	281	758	1.00 (ref)	0.980958	0.998465
			AG	542	536	1.03 (0.88,1.21)			344	536	1.05 (0.88,1.26)			198	536	1.02 (0.82,1.26)
			GG	127	107	1.21 (0.92,1.60)			89	107	1.36 (1.00,1.85)			38	107	0.99 (0.66,1.48)
			Additive*	1409	1401	1.07 (0.95,1.20)	0.239951	0.919641	892	1401	1.12 (0.98,1.27)	0.0939236	0.919895	517	1401	1.00 (0.85,1.18)	0.952754	0.9965
			Dominant (AG + GG vs. AA)	1409	1401	1.06 (0.92,1.24)	0.419213	0.909564	892	1401	1.10 (0.93,1.31)	0.266725	0.954412	517	1401	1.01 (0.82,1.25)	0.8977	0.993345
			Recessive (GG vs. AA + AG)	1409	1401	1.19 (0.91,1.56)	0.202645	0.958279	892	1401	1.33 (0.99,1.79)	0.0595386	0.973242	517	1401	0.98 (0.66,1.45)	0.919112	0.997105
		rs1276721	GG	910	926	1.00 (ref)	0.30659	0.945666	585	926	1.00 (ref)	0.638739	0.995233	325	926	1.00 (ref)	0.198794	0.968037
			GC	440	439	1.02 (0.87,1.20)			273	439	0.99 (0.82,1.19)			167	439	1.09 (0.87,1.36)
			CC	65	49	1.35 (0.92,1.98)			38	49	1.22 (0.79,1.90)			27	49	1.54 (0.94,2.52)
			Additive*	1415	1414	1.08 (0.94,1.23)	0.279827	0.921281	896	1414	1.03 (0.89,1.20)	0.682734	0.986214	519	1414	1.15 (0.96,1.38)	0.118638	0.849006
			Dominant (GC + CC vs. GG)	1415	1414	1.05 (0.90,1.23)	0.515932	0.939842	896	1414	1.01 (0.85,1.21)	0.91692	0.988031	519	1414	1.13 (0.92,1.40)	0.242553	0.936074
			Recessive (CC vs. GG + GC)	1415	1414	1.34 (0.92,1.96)	0.128547	0.93822	896	1414	1.23 (0.80,1.90)	0.350411	0.99075	519	1414	1.50 (0.92,2.44)	0.101723	0.939462
		rs1398431	GG	1158	1159	1.00 (ref)	0.796071	0.998205	750	1159	1.00 (ref)	0.375562	0.995233	408	1159	1.00 (ref)	0.169782	0.956487
			GA	247	252	0.98 (0.81,1.19)			141	252	0.85 (0.68,1.07)			106	252	1.25 (0.96,1.61)
			AA	12	9	1.33 (0.55,3.17)			7	9	1.16 (0.43,3.15)			5	9	1.72 (0.56,5.28)
			Additive*	1417	1420	1.00 (0.84,1.20)	0.960628	0.997512	898	1420	0.89 (0.72,1.09)	0.258422	0.954353	519	1420	1.26 (0.99,1.59)	0.0610557	0.663953
			Dominant (GA + AA vs. GG)	1417	1420	0.99 (0.82,1.20)	0.928067	0.993817	898	1420	0.86 (0.69,1.08)	0.202728	0.945508	519	1420	1.26 (0.98,1.62)	0.0728119	0.7737
			Recessive (AA vs. GG + GA)	1417	1420	1.33 (0.56,3.18)	0.520774	0.999936	898	1420	1.19 (0.44,3.24)	0.730798	0.99075	519	1420	1.64 (0.54,5.02)	0.38302	0.986454
		rs1512706	GG	1247	1286	1.00 (ref)	0.302624	0.945666	787	1286	1.00 (ref)	0.265576	0.995233	460	1286	1.00 (ref)	0.501554	0.997765
			GA	99	80	1.27 (0.94,1.73)			63	80	1.31 (0.93,1.85)			36	80	1.23 ( 0.81, 1.86)
			AA	3	3	1.03 (0.20,5.22)			1	3	0.51 (0.05,5.01)			2	3	1.85 ( 0.29,11.62)
			Additive*	1349	1369	1.24 (0.93,1.65)	0.14421	0.893705	851	1369	1.23 (0.89,1.71)	0.212516	0.919895	498	1369	1.25 (0.86,1.82)	0.247446	0.895465
			Dominant (GA + AA vs. GG)	1349	1369	1.26 (0.94,1.71)	0.12686	0.876046	851	1369	1.28 (0.91,1.79)	0.161337	0.944491	498	1369	1.25 (0.84,1.87)	0.274394	0.942545
			Recessive (AA vs. GG + GA)	1349	1369	1.02 (0.20,5.17)	0.976616	0.999936	851	1369	0.51 (0.05,4.99)	0.561518	0.99075	498	1369	1.83 ( 0.29,11.53)	0.520017	0.997105
		rs1687696	AA	321	318	1.00 (ref)	0.599678	0.97639	210	318	1.00 (ref)	0.418301	0.995233	111	318	1.00 (ref)	0.962894	0.998465
			AT	629	653	0.94 (0.78,1.14)			384	653	0.90 (0.72,1.12)			245	653	1.00 (0.77,1.31)
			TT	294	277	1.04 (0.83,1.30)			187	277	1.03 (0.80,1.33)			107	277	1.04 (0.76,1.43)
			Additive*	1244	1248	1.02 (0.91,1.14)	0.782988	0.997512	781	1248	1.01 (0.89,1.15)	0.863405	0.990677	463	1248	1.02 (0.87,1.19)	0.813121	0.9965
			Dominant (AT + TT vs. AA)	1244	1248	0.97 (0.81,1.16)	0.740542	0.9708	781	1248	0.94 (0.76,1.15)	0.546335	0.966481	463	1248	1.01 (0.79,1.31)	0.9116	0.993355
			Recessive (TT vs. AA + AT)	1244	1248	1.08 (0.89,1.30)	0.424285	0.999936	781	1248	1.11 (0.89,1.37)	0.359968	0.99075	463	1248	1.04 (0.80,1.34)	0.784437	0.997105
		rs1707285	GG	364	380	1.00 (ref)	0.750772	0.995643	228	380	1.00 (ref)	0.865775	0.995233	136	380	1.00 (ref)	0.769633	0.998465
			GC	632	644	1.05 (0.87,1.25)			391	644	1.02 (0.83,1.26)			241	644	1.09 (0.85,1.40)
			CC	252	274	0.97 (0.77,1.22)			157	274	0.96 (0.74,1.24)			95	274	1.02 (0.74,1.39)
			Additive*	1248	1298	0.99 (0.89,1.11)	0.867789	0.997512	776	1298	0.98 (0.86,1.12)	0.796014	0.989836	472	1298	1.01 (0.87,1.18)	0.854043	0.9965
			Dominant (GC + CC vs. GG)	1248	1298	1.02 (0.86,1.22)	0.792158	0.985187	776	1298	1.00 (0.82,1.22)	0.967915	0.994194	472	1298	1.07 (0.84,1.35)	0.592697	0.983065
			Recessive (CC vs. GG + GC)	1248	1298	0.94 (0.78,1.15)	0.558587	0.999936	776	1298	0.95 (0.76,1.18)	0.622177	0.99075	472	1298	0.96 (0.74,1.26)	0.776385	0.997105
		rs17336476	AA	1255	1269	1.00 (ref)	0.306827	0.945666	799	1269	1.00 (ref)	0.692029	0.995233	456	1269	1.00 (ref)	0.172113	0.962857
			AG	95	76	1.25 (0.92,1.71)			56	76	1.14 (0.79,1.63)			39	76	1.45 (0.97,2.18)
			GG	6	4	1.52 (0.43,5.45)			4	4	1.43 (0.35,5.77)			2	4	1.64 (0.29,9.32)
			Additive*	1356	1349	1.25 (0.94,1.66)	0.1245	0.893705	859	1349	1.15 (0.83,1.59)	0.395276	0.961096	497	1349	1.42 (0.98,2.06)	0.0629917	0.663953
			Dominant (AG + GG vs. AA)	1356	1349	1.27 (0.93,1.72)	0.130951	0.878304	859	1349	1.15 (0.81,1.64)	0.422833	0.95613	497	1349	1.46 (0.98,2.18)	0.0614457	0.750475
			Recessive (GG vs. AA + AG)	1356	1349	1.50 (0.42,5.36)	0.534922	0.999936	859	1349	1.41 (0.35,5.71)	0.628002	0.99075	497	1349	1.60 (0.28,9.09)	0.593286	0.997105
		rs17426570	GG	1202	1219	1.00 (ref)	0.999638	0.999638	767	1219	1.00 (ref)	0.823019	0.995233	435	1219	1.00 (ref)	0.672635	0.998465
			GA	158	160	1.00 (0.79,1.27)			93	160	0.93 (0.70,1.22)			65	160	1.11 (0.81,1.52)
			AA	5	5	0.98 (0.28,3.42)			4	5	1.22 (0.32,4.63)			1	5	0.52 (0.06,4.56)
			Additive*	1365	1384	1.00 (0.80,1.25)	0.997857	0.999735	864	1384	0.95 (0.74,1.23)	0.691844	0.986214	501	1384	1.07 (0.79,1.44)	0.662323	0.980182
			Dominant (GA + AA vs. GG)	1365	1384	1.00 (0.79,1.26)	0.998364	0.999128	864	1384	0.94 (0.71,1.23)	0.631989	0.971776	501	1384	1.09 (0.80,1.49)	0.575512	0.98242
			Recessive (AA vs. GG + GA)	1365	1384	0.98 (0.28,3.42)	0.979164	0.999936	864	1384	1.23 (0.33,4.66)	0.756953	0.99075	501	1384	0.52 (0.06,4.50)	0.550733	0.997105
		rs17431426	AA	1033	1017	1.00 (ref)	0.805903	0.998205	647	1017	1.00 (ref)	0.988773	0.99898	386	1017	1.00 (ref)	0.469759	0.993487
			AG	345	358	0.95 (0.80,1.12)			224	358	0.99 (0.82,1.21)			121	358	0.89 (0.70,1.13)
			GG	35	37	0.94 (0.58,1.50)			24	37	1.04 (0.61,1.76)			11	37	0.74 (0.37,1.47)
			Additive*	1413	1412	0.95 (0.83,1.10)	0.522195	0.975301	895	1412	1.00 (0.85,1.18)	0.977196	0.993713	518	1412	0.88 (0.72,1.08)	0.222617	0.889865
			Dominant (AG + GG vs. AA)	1413	1412	0.95 (0.80,1.12)	0.512376	0.935581	895	1412	1.00 (0.83,1.21)	0.986447	0.994378	518	1412	0.88 (0.70,1.10)	0.264009	0.94168
			Recessive (GG vs. AA + AG)	1413	1412	0.95 (0.59,1.52)	0.825691	0.999936	895	1412	1.04 (0.61,1.75)	0.889123	0.998232	518	1412	0.76 (0.38,1.51)	0.428226	0.986454
		rs17431739	AA	1329	1341	1.00 (ref)	0.747868	0.995381	839	1341	1.00 (ref)	0.493993	0.995233	490	1341	1.00 (ref)	0.985814	0.998465
			AG	82	76	1.08 ( 0.78, 1.50)			54	76	1.13 ( 0.78, 1.63)			28	76	1.04 (0.66,1.64)
			GG	2	1	2.06 ( 0.19,22.78)			2	1	3.41 ( 0.31,38.01)			0	1	0.00 (0.00, Inf)
			Additive*	1413	1418	1.11 (0.81,1.52)	0.527371	0.976999	895	1418	1.18 (0.83,1.67)	0.350755	0.961096	518	1418	1.01 (0.64,1.59)	0.964411	0.9965
			Dominant (AG + GG vs. AA)	1413	1418	1.10 (0.79,1.52)	0.571695	0.948353	895	1418	1.16 (0.81,1.66)	0.422277	0.95613	518	1418	1.03 (0.65,1.62)	0.91416	0.993355
			Recessive (GG vs. AA + AG)	1413	1418	2.05 ( 0.19,22.71)	0.558362	0.999936	895	1418	3.39 ( 0.30,37.83)	0.321088	0.99075	518	1418	0.00 (0.00, Inf)	0.987738	0.997105
		rs1801224	AA	601	669	1.00 (ref)	0.014854	0.677053	359	669	1.00 (ref)	0.00397774	0.472628	242	669	1.00 (ref)	0.517123	0.998465
			AC	614	582	1.18 (1.00,1.38)			399	582	1.26 (1.05,1.51)			215	582	1.04 (0.84,1.30)
			CC	180	144	1.40 (1.09,1.80)			120	144	1.52 (1.15,2.01)			60	144	1.22 (0.87,1.73)
			Additive*	1395	1395	1.18 (1.06,1.32)	0.00371945	0.373948	878	1395	1.24 (1.09,1.41)	0.000903679	0.16873	517	1395	1.08 (0.93,1.27)	0.30801	0.925554
			Dominant (AC + CC vs. AA)	1395	1395	1.22 (1.05,1.42)	0.0104301	0.560589	878	1395	1.31 (1.10,1.56)	0.00232228	0.377361	517	1395	1.07 (0.87,1.32)	0.494205	0.965378
			Recessive (CC vs. AA + AC)	1395	1395	1.29 (1.02,1.63)	0.0351065	0.89806	878	1395	1.35 (1.04,1.76)	0.0257626	0.874845	517	1395	1.20 (0.86,1.67)	0.27569	0.986454
		rs1801230	GG	1345	1345	1.00 (ref)	0.775059	0.998205	850	1345	1.00 (ref)	0.900237	0.995233	495	1345	1.00 (ref)	0.421531	0.981696
			GA	63	67	0.95 (0.67,1.35)			42	67	1.03 (0.69,1.53)			21	67	0.81 (0.49,1.35)
			AA	0	0	- (-,-)			0	0	- (-,-)			0	0	- (-,-)
			Additive*	1408	1412	0.95 (0.67,1.35)	0.775059	0.997512	892	1412	1.03 (0.69,1.53)	0.900237	0.991246	516	1412	0.81 (0.49,1.35)	0.421531	0.925584
			Dominant (GA + AA vs. GG)	1408	1412	0.95 (0.67,1.35)	0.775059	0.984108	892	1412	1.03 (0.69,1.53)	0.900237	0.985276	516	1412	0.81 (0.49,1.35)	0.421531	0.964065
			Recessive (AA vs. GG + GA)			- (-,-)	-				- (-,-)	-				- (-,-)	-
		rs1801231	AA	1101	1132	1.00 (ref)	0.387733	0.95768	706	1132	1.00 (ref)	0.696092	0.995233	395	1132	1.00 (ref)	0.104854	0.898325
			AG	296	272	1.12 (0.93,1.35)			177	272	1.03 (0.83,1.28)			119	272	1.30 (1.02,1.67)
			GG	19	15	1.31 (0.66,2.60)			13	15	1.37 (0.64,2.92)			6	15	1.26 (0.48,3.32)
			Additive*	1416	1419	1.12 (0.95,1.33)	0.169995	0.916293	896	1419	1.06 (0.88,1.28)	0.544979	0.981487	520	1419	1.27 (1.01,1.58)	0.0403872	0.663953
			Dominant (AG + GG vs. AA)	1416	1419	1.13 (0.94,1.35)	0.191723	0.908669	896	1419	1.05 (0.85,1.29)	0.659072	0.977938	520	1419	1.30 (1.02,1.66)	0.0337867	0.702543
			Recessive (GG vs. AA + AG)	1416	1419	1.28 (0.64,2.53)	0.483897	0.999936	896	1419	1.36 (0.64,2.90)	0.420329	0.99075	520	1419	1.18 (0.45,3.11)	0.730989	0.997105
		rs1801239	AA	1076	1083	1.00 (ref)	0.37841	0.95768	669	1083	1.00 (ref)	0.658008	0.995233	407	1083	1.00 (ref)	0.283396	0.975592
			AG	236	257	0.92 (0.75,1.12)			157	257	0.97 (0.78,1.21)			79	257	0.84 (0.63,1.12)
			GG	24	17	1.41 (0.75,2.66)			15	17	1.36 (0.67,2.77)			9	17	1.51 (0.66,3.46)
			Additive*	1336	1357	0.99 (0.83,1.17)	0.884506	0.997512	841	1357	1.02 (0.84,1.24)	0.836783	0.990677	495	1357	0.94 (0.73,1.19)	0.594016	0.975107
			Dominant (AG + GG vs. AA)	1336	1357	0.95 (0.78,1.15)	0.608575	0.963936	841	1357	1.00 (0.80,1.24)	0.971127	0.994194	495	1357	0.88 (0.67,1.16)	0.366	0.95393
			Recessive (GG vs. AA + AG)	1336	1357	1.44 (0.76,2.69)	0.260428	0.976657	841	1357	1.37 (0.68,2.78)	0.380083	0.99075	495	1357	1.55 (0.68,3.56)	0.29725	0.986454
		rs1877479	GG	548	582	1.00 (ref)	0.342725	0.955592	346	582	1.00 (ref)	0.615613	0.995233	202	582	1.00 (ref)	0.293549	0.975592
			GC	625	628	1.06 (0.90,1.24)			397	628	1.06 (0.88,1.27)			228	628	1.06 (0.85,1.33)
			CC	195	174	1.19 (0.94,1.51)			120	174	1.14 (0.87,1.49)			75	174	1.29 (0.94,1.78)
			Additive*	1368	1384	1.08 (0.97,1.21)	0.158467	0.916293	863	1384	1.06 (0.94,1.21)	0.327897	0.95727	505	1384	1.12 (0.96,1.30)	0.149667	0.882838
			Dominant (GC + CC vs. GG)	1368	1384	1.09 (0.93,1.27)	0.289818	0.908669	863	1384	1.08 (0.90,1.28)	0.418115	0.95596	505	1384	1.11 (0.90,1.37)	0.325784	0.942545
			Recessive (CC vs. GG + GC)	1368	1384	1.16 (0.93,1.44)	0.1933	0.958279	863	1384	1.11 (0.86,1.42)	0.427526	0.99075	505	1384	1.25 (0.93,1.68)	0.141435	0.939462
		rs1907368	AA	440	415	1.00 (ref)	0.490242	0.95768	284	415	1.00 (ref)	0.390877	0.995233	156	415	1.00 (ref)	0.802751	0.998465
			AG	666	696	0.90 (0.76,1.07)			423	696	0.88 (0.72,1.07)			243	696	0.95 (0.74,1.20)
			GG	269	272	0.93 (0.75,1.15)			166	272	0.88 (0.69,1.13)			103	272	1.03 (0.76,1.38)
			Additive*	1375	1383	0.96 (0.86,1.06)	0.41543	0.958231	873	1383	0.93 (0.82,1.05)	0.262629	0.954353	502	1383	1.01 (0.87,1.17)	0.931154	0.9965
			Dominant (AG + GG vs. AA)	1375	1383	0.91 (0.77,1.07)	0.248231	0.908669	873	1383	0.88 (0.73,1.06)	0.171077	0.944491	502	1383	0.97 (0.77,1.21)	0.7791	0.988428
			Recessive (GG vs. AA + AG)	1375	1383	0.99 (0.82,1.20)	0.923647	0.999936	873	1383	0.96 (0.77,1.19)	0.701893	0.99075	502	1383	1.06 (0.82,1.38)	0.63527	0.997105
		rs1914172	CC	616	587	1.00 (ref)	0.427888	0.95768	385	587	1.00 (ref)	0.426158	0.995233	231	587	1.00 (ref)	0.491955	0.996002
			CA	628	652	0.92 (0.78,1.07)			408	652	0.94 (0.78,1.12)			220	652	0.88 (0.71,1.10)
			AA	159	172	0.88 (0.69,1.12)			96	172	0.83 (0.63,1.10)			63	172	0.99 (0.71,1.37)
			Additive*	1403	1411	0.93 (0.83,1.04)	0.200632	0.919641	889	1411	0.92 (0.81,1.05)	0.203337	0.919895	514	1411	0.96 (0.82,1.11)	0.569863	0.973084
			Dominant (CA + AA vs. CC)	1403	1411	0.91 (0.78,1.06)	0.211256	0.908669	889	1411	0.92 (0.77,1.09)	0.320018	0.95596	514	1411	0.90 (0.73,1.11)	0.324457	0.942545
			Recessive (AA vs. CC + CA)	1403	1411	0.92 (0.73,1.15)	0.459624	0.999936	889	1411	0.86 (0.66,1.12)	0.265823	0.99075	514	1411	1.05 (0.77,1.44)	0.745174	0.997105
		rs1996317	GG	452	482	1.00 (ref)	0.388788	0.95768	279	482	1.00 (ref)	0.327969	0.995233	173	482	1.00 (ref)	0.764472	0.998465
			GA	624	619	1.08 (0.91,1.28)			393	619	1.09 (0.90,1.33)			231	619	1.06 (0.84,1.34)
			AA	244	222	1.17 (0.93,1.46)			156	222	1.21 (0.94,1.56)			88	222	1.12 (0.82,1.52)
			Additive*	1320	1323	1.08 (0.97,1.20)	0.169349	0.916293	828	1323	1.10 (0.97,1.24)	0.135735	0.919895	492	1323	1.06 (0.91,1.23)	0.464179	0.929068
			Dominant (GA + AA vs. GG)	1320	1323	1.10 (0.94,1.29)	0.241274	0.908669	828	1323	1.13 (0.94,1.35)	0.209541	0.946192	492	1323	1.08 (0.86,1.34)	0.514201	0.965378
			Recessive (AA vs. GG + GA)	1320	1323	1.12 (0.91,1.37)	0.281732	0.98155	828	1323	1.15 (0.91,1.45)	0.233962	0.99075	492	1323	1.08 (0.82,1.42)	0.591168	0.997105
		rs2271460	AA	1403	1393	1.00 (ref)	0.217699	0.903575	887	1393	1.00 (ref)	0.548526	0.995233	516	1393	1.00 (ref)	0.229669	0.968615
			AC	10	20	0.50 ( 2.300000e-01, 1.090000e+00)			8	20	0.63 ( 2.700000e-01, 1.450000e+00)			2	20	0.27 (0.06,1.20)
			CC	0	3	- (-,-)			0	3	- (-,-)			0	3	- (-,-)
			Additive*	1413	1416	0.43 (0.21,0.87)	0.019281	0.662928	895	1416	0.52 (0.24,1.11)	0.0908592	0.919895	518	1416	0.26 (0.06,1.06)	0.0602478	0.663953
			Dominant (AC + CC vs. AA)	1413	1416	0.43 (0.20,0.92)	0.0298647	0.692616	895	1416	0.54 (0.24,1.21)	0.134935	0.937386	518	1416	0.24 (0.06,1.05)	0.0578277	0.750475
			Recessive (CC vs. AA + AC)	1413	1416	- (-,-)	0.946316	0.999936	895	1416	- (-,-)	0.965677	0.999227	518	1416	- (-,-)	0.978977	0.997105
		rs2271461	GG	934	913	1.00 (ref)	0.738468	0.995381	571	913	1.00 (ref)	0.792022	0.995233	363	913	1.00 (ref)	0.0640495	0.881742
			GA	430	450	0.94 (0.80,1.10)			285	450	1.03 (0.86,1.24)			145	450	0.80 (0.64,1.00)
			AA	50	51	0.96 (0.64,1.43)			38	51	1.15 (0.74,1.78)			12	51	0.60 (0.31,1.15)
			Additive*	1414	1414	0.95 (0.83,1.09)	0.485351	0.958231	894	1414	1.05 (0.90,1.22)	0.53273	0.981487	520	1414	0.79 (0.65,0.96)	0.0189808	0.605489
			Dominant (GA + AA vs. GG)	1414	1414	0.94 (0.80,1.10)	0.440096	0.913548	894	1414	1.05 (0.88,1.25)	0.619589	0.97053	520	1414	0.78 (0.63,0.97)	0.027618	0.656303
			Recessive (AA vs. GG + GA)	1414	1414	0.98 (0.66,1.46)	0.915856	0.999936	894	1414	1.14 (0.74,1.75)	0.558039	0.99075	520	1414	0.64 (0.34,1.22)	0.179848	0.939462
		rs2271469	CC	382	342	1.00 (ref)	0.0954269	0.871526	227	342	1.00 (ref)	0.21046	0.977232	155	342	1.00 (ref)	0.0382432	0.881742
			CA	480	531	0.81 (0.67,0.98)			286	531	0.83 (0.66,1.03)			194	531	0.78 (0.60,1.01)
			AA	279	295	0.85 (0.68,1.06)			186	295	0.95 (0.74,1.22)			93	295	0.68 (0.50,0.93)
			Additive*	1141	1168	0.92 (0.82,1.02)	0.123346	0.893705	699	1168	0.97 (0.85,1.10)	0.632475	0.984432	442	1168	0.82 (0.71,0.96)	0.01259	0.530809
			Dominant (CA + AA vs. CC)	1141	1168	0.83 (0.69,0.99)	0.0342662	0.692616	699	1168	0.87 (0.71,1.07)	0.187928	0.945508	442	1168	0.75 (0.59,0.95)	0.0164978	0.629159
			Recessive (AA vs. CC + CA)	1141	1168	0.96 (0.80,1.16)	0.696073	0.999936	699	1168	1.06 (0.86,1.32)	0.571478	0.99075	442	1168	0.79 (0.60,1.03)	0.0869793	0.939462
		rs2273737	AA	1128	1145	1.00 (ref)	0.620876	0.977081	707	1145	1.00 (ref)	0.414682	0.995233	421	1145	1.00 (ref)	0.919504	0.998465
			AC	214	197	1.11 (0.90,1.37)			144	197	1.17 (0.93,1.49)			70	197	0.99 (0.73,1.34)
			CC	19	18	1.07 (0.56,2.07)			12	18	1.02 (0.48,2.15)			7	18	1.20 (0.49,2.94)
			Additive*	1361	1360	1.09 (0.91,1.31)	0.363582	0.940499	863	1360	1.13 (0.92,1.38)	0.258964	0.954353	498	1360	1.02 (0.79,1.32)	0.884211	0.9965
			Dominant (AC + CC vs. AA)	1361	1360	1.11 (0.90,1.36)	0.33142	0.908669	863	1360	1.16 (0.92,1.46)	0.202415	0.945508	498	1360	1.01 (0.75,1.34)	0.969751	0.998034
			Recessive (CC vs. AA + AC)	1361	1360	1.05 (0.55,2.03)	0.87545	0.999936	863	1360	0.99 (0.47,2.08)	0.976074	0.999227	498	1360	1.20 (0.49,2.94)	0.686491	0.997105
		rs2281649	GG	909	932	1.00 (ref)	0.0598633	0.871526	572	932	1.00 (ref)	0.0351516	0.729255	337	932	1.00 (ref)	0.485049	0.996002
			GA	421	429	1.01 (0.85,1.18)			266	429	1.00 (0.83,1.20)			155	429	1.02 (0.82,1.28)
			AA	74	48	1.58 (1.08,2.31)			51	48	1.72 (1.13,2.60)			23	48	1.38 (0.82,2.33)
			Additive*	1404	1409	1.10 (0.97,1.26)	0.140902	0.893705	889	1409	1.12 (0.97,1.31)	0.125612	0.919895	515	1409	1.08 (0.90,1.30)	0.401744	0.925584
			Dominant (GA + AA vs. GG)	1404	1409	1.06 (0.91,1.24)	0.462721	0.914707	889	1409	1.07 (0.89,1.28)	0.478446	0.966481	515	1409	1.06 (0.85,1.31)	0.611913	0.988428
			Recessive (AA vs. GG + GA)	1404	1409	1.57 (1.08,2.29)	0.017682	0.89806	889	1409	1.72 (1.14,2.59)	0.00966514	0.8106	515	1409	1.37 (0.81,2.30)	0.235753	0.953598
		rs2356215	GG	1112	1107	1.00 (ref)	0.566668	0.972276	692	1107	1.00 (ref)	0.865109	0.995233	420	1107	1.00 (ref)	0.208717	0.968037
			GA	279	287	0.97 (0.80,1.16)			188	287	1.03 (0.83,1.27)			91	287	0.86 (0.66,1.12)
			AA	11	16	0.67 (0.30,1.46)			9	16	0.82 (0.36,1.89)			2	16	0.33 (0.07,1.50)
			Additive*	1402	1410	0.94 (0.79,1.11)	0.459681	0.958231	889	1410	1.00 (0.83,1.21)	0.978731	0.993713	513	1410	0.82 (0.64,1.05)	0.115143	0.849006
			Dominant (GA + AA vs. GG)	1402	1410	0.95 (0.79,1.14)	0.581088	0.953372	889	1410	1.02 (0.83,1.25)	0.881229	0.983582	513	1410	0.84 (0.64,1.09)	0.179056	0.897818
			Recessive (AA vs. GG + GA)	1402	1410	0.67 (0.31,1.47)	0.317899	0.985701	889	1410	0.82 (0.35,1.88)	0.632898	0.99075	513	1410	0.35 (0.08,1.55)	0.165827	0.939462
		rs2356590	CC	1349	1346	1.00 (ref)	0.346143	0.955592	864	1346	1.00 (ref)	0.888116	0.995233	485	1346	1.00 (ref)	0.0512608	0.881742
			CA	55	45	1.22 (0.81,1.82)			27	45	0.97 (0.59,1.58)			28	45	1.63 (1.00,2.67)
			AA	0	0	- (-,-)			0	0	- (-,-)			0	0	- (-,-)
			Additive*	1404	1391	1.22 (0.81,1.82)	0.346143	0.925706	891	1391	0.97 (0.59,1.58)	0.888116	0.990677	513	1391	1.63 (1.00,2.67)	0.0512608	0.663953
			Dominant (CA + AA vs. CC)	1404	1391	1.22 (0.81,1.82)	0.346143	0.908669	891	1391	0.97 (0.59,1.58)	0.888116	0.984763	513	1391	1.63 (1.00,2.67)	0.0512608	0.744569
			Recessive (AA vs. CC + CA)			- (-,-)	-				- (-,-)	-				- (-,-)	-
		rs2603794	AA	938	978	1.00 (ref)	0.123612	0.871526	589	978	1.00 (ref)	0.0731958	0.822179	349	978	1.00 (ref)	0.588868	0.998465
			AG	418	372	1.18 (1.00,1.40)			268	372	1.25 (1.03,1.51)			150	372	1.08 (0.86,1.36)
			GG	53	60	0.93 (0.63,1.36)			34	60	0.97 (0.63,1.51)			19	60	0.83 (0.48,1.42)
			Additive*	1409	1410	1.08 (0.95,1.24)	0.252602	0.919641	891	1410	1.13 (0.97,1.31)	0.130635	0.919895	518	1410	1.00 (0.83,1.21)	0.965471	0.9965
			Dominant (AG + GG vs. AA)	1409	1410	1.15 (0.98,1.35)	0.0981115	0.876046	891	1410	1.21 (1.00,1.45)	0.0443997	0.805979	518	1410	1.05 (0.84,1.31)	0.691347	0.988428
			Recessive (GG vs. AA + AG)	1409	1410	0.88 (0.60,1.28)	0.499973	0.999936	891	1410	0.90 (0.59,1.39)	0.647702	0.99075	518	1410	0.81 (0.47,1.37)	0.430442	0.986454
		rs2603796	GG	624	624	1.00 (ref)	0.847639	0.998205	391	624	1.00 (ref)	0.640927	0.995233	233	624	1.00 (ref)	0.951578	0.998465
			GA	608	609	1.00 (0.85,1.17)			385	609	1.02 (0.85,1.22)			223	609	0.97 (0.78,1.20)
			AA	172	161	1.07 (0.84,1.36)			112	161	1.14 (0.87,1.50)			60	161	0.97 (0.69,1.36)
			Additive*	1404	1394	1.02 (0.92,1.14)	0.691851	0.988751	888	1394	1.05 (0.93,1.19)	0.417301	0.961096	516	1394	0.98 (0.84,1.14)	0.784978	0.9965
			Dominant (GA + AA vs. GG)	1404	1394	1.01 (0.87,1.18)	0.869507	0.990522	888	1394	1.05 (0.88,1.24)	0.61424	0.97053	516	1394	0.97 (0.79,1.19)	0.753073	0.988428
			Recessive (AA vs. GG + GA)	1404	1394	1.07 (0.85,1.35)	0.565623	0.999936	888	1394	1.13 (0.87,1.47)	0.358895	0.99075	516	1394	0.99 (0.72,1.36)	0.932328	0.997105
		rs2603804	AA	1070	1068	1.00 (ref)	0.927754	0.998914	672	1068	1.00 (ref)	0.679086	0.995233	398	1068	1.00 (ref)	0.655199	0.998465
			AG	307	300	1.03 (0.86,1.24)			197	300	1.10 (0.89,1.35)			110	300	0.93 (0.72,1.20)
			GG	31	33	0.95 (0.58,1.57)			21	33	1.07 (0.61,1.88)			10	33	0.75 (0.36,1.55)
			Additive*	1408	1401	1.01 (0.87,1.18)	0.890311	0.997512	890	1401	1.08 (0.90,1.28)	0.415806	0.961096	518	1401	0.91 (0.73,1.13)	0.386607	0.925584
			Dominant (AG + GG vs. AA)	1408	1401	1.02 (0.86,1.22)	0.810622	0.986969	890	1401	1.09 (0.89,1.34)	0.380633	0.95596	518	1401	0.91 (0.71,1.17)	0.463661	0.965378
			Recessive (GG vs. AA + AG)	1408	1401	0.94 (0.57,1.55)	0.818201	0.999936	890	1401	1.05 (0.60,1.83)	0.870032	0.997721	518	1401	0.76 (0.37,1.58)	0.465655	0.99634
		rs2669154	AA	452	512	1.00 (ref)	0.0520741	0.871526	289	512	1.00 (ref)	0.312581	0.995233	163	512	1.00 (ref)	0.0290523	0.881742
			AC	628	653	1.09 (0.92,1.29)			394	653	1.07 (0.88,1.30)			234	653	1.14 (0.90,1.44)
			CC	253	219	1.32 (1.06,1.65)			153	219	1.22 (0.94,1.57)			100	219	1.50 (1.11,2.03)
			Additive*	1333	1384	1.14 (1.02,1.27)	0.0188425	0.662928	836	1384	1.10 (0.97,1.24)	0.137903	0.919895	497	1384	1.21 (1.05,1.41)	0.0106773	0.516861
			Dominant (AC + CC vs. AA)	1333	1384	1.15 (0.98,1.35)	0.0886269	0.876046	836	1384	1.11 (0.92,1.33)	0.270214	0.954412	497	1384	1.23 (0.98,1.53)	0.0683261	0.756798
			Recessive (CC vs. AA + AC)	1333	1384	1.25 (1.03,1.53)	0.0274077	0.89806	836	1384	1.17 (0.93,1.48)	0.173613	0.99075	497	1384	1.39 (1.07,1.82)	0.0149476	0.939462
		rs2942366	GG	458	445	1.00 (ref)	0.766482	0.995817	289	445	1.00 (ref)	0.587546	0.995233	169	445	1.00 (ref)	0.846567	0.998465
			GA	645	667	0.95 (0.80,1.12)			403	667	0.94 (0.77,1.14)			242	667	0.96 (0.76,1.21)
			AA	278	271	1.00 (0.81,1.24)			184	271	1.05 (0.83,1.34)			94	271	0.92 (0.68,1.24)
			Additive*	1381	1383	0.99 (0.89,1.10)	0.916146	0.997512	876	1383	1.02 (0.90,1.15)	0.778939	0.988421	505	1383	0.96 (0.83,1.11)	0.56382	0.973084
			Dominant (GA + AA vs. GG)	1381	1383	0.96 (0.82,1.13)	0.639311	0.963936	876	1383	0.97 (0.81,1.17)	0.776952	0.977938	505	1383	0.95 (0.76,1.18)	0.622299	0.988428
			Recessive (AA vs. GG + GA)	1381	1383	1.04 (0.86,1.25)	0.717858	0.999936	876	1383	1.09 (0.89,1.35)	0.406929	0.99075	505	1383	0.94 (0.72,1.23)	0.653492	0.997105
		rs3012479	CC	646	651	1.00 (ref)	0.936701	0.999638	401	651	1.00 (ref)	0.593778	0.995233	245	651	1.00 (ref)	0.72536	0.998465
			CA	605	598	1.03 (0.88,1.20)			386	598	1.07 (0.89,1.28)			219	598	0.96 (0.77,1.20)
			AA	157	153	1.03 (0.81,1.33)			107	153	1.14 (0.86,1.50)			50	153	0.87 (0.61,1.24)
			Additive*	1408	1402	1.02 (0.91,1.14)	0.730348	0.996354	894	1402	1.07 (0.94,1.21)	0.307534	0.95727	514	1402	0.94 (0.81,1.10)	0.450261	0.925584
			Dominant (CA + AA vs. CC)	1408	1402	1.03 (0.89,1.19)	0.720668	0.970342	894	1402	1.08 (0.91,1.29)	0.352358	0.95596	514	1402	0.94 (0.77,1.16)	0.575015	0.98242
			Recessive (AA vs. CC + CA)	1408	1402	1.02 (0.81,1.29)	0.866239	0.999936	894	1402	1.10 (0.84,1.43)	0.479153	0.99075	514	1402	0.88 (0.63,1.24)	0.46976	0.997105
		rs3012501	CC	855	855	1.00 (ref)	0.178752	0.903158	524	855	1.00 (ref)	0.312433	0.995233	331	855	1.00 (ref)	0.284502	0.975592
			CG	403	424	0.95 (0.81,1.13)			261	424	1.00 (0.83,1.21)			142	424	0.89 (0.70,1.12)
			GG	57	40	1.43 (0.94,2.18)			37	40	1.43 (0.90,2.28)			20	40	1.36 (0.77,2.38)
			Additive*	1315	1319	1.04 (0.90,1.19)	0.598253	0.988751	822	1319	1.07 (0.91,1.25)	0.39686	0.961096	493	1319	0.98 (0.81,1.19)	0.839953	0.9965
			Dominant (CG + GG vs. CC)	1315	1319	0.99 (0.85,1.17)	0.93447	0.993817	822	1319	1.04 (0.86,1.25)	0.696822	0.977938	493	1319	0.92 (0.74,1.16)	0.491863	0.965378
			Recessive (GG vs. CC + CG)	1315	1319	1.45 (0.96,2.20)	0.0776017	0.916218	822	1319	1.43 (0.90,2.28)	0.127177	0.99075	493	1319	1.41 (0.81,2.46)	0.226879	0.951857
		rs3740168	GG	1289	1355	1.00 (ref)	0.793928	0.998205	818	1355	1.00 (ref)	0.493451	0.995233	471	1355	1.00 (ref)	0.734198	0.998465
			GC	33	38	0.94 (0.58,1.51)			18	38	0.82 (0.46,1.45)			15	38	1.11 (0.60,2.07)
			CC	0	0	- (-,-)			0	0	- (-,-)			0	0	- (-,-)
			Additive*	1322	1393	0.94 (0.58,1.51)	0.793928	0.997512	836	1393	0.82 (0.46,1.45)	0.493451	0.981487	486	1393	1.11 (0.60,2.07)	0.734198	0.994061
[truncated: 6,457 more rows]

## Sheet: Supplementary Table 5
Supplementary Table 5. Associations of SNPs with CRC risk overall and by tumor location (colon vs. rectum) among men and women using unconditional logistic regression with adjustment for age at recruitment, study center and sex, the EPIC study, 1992-2003.
[truncated: 7,857 more rows]

[truncated: 5 more sheets: Supplementary Table 6, Supplementary Table 7, Supplementary Table 8, Supplementary Table 9, Supplementary Table 10]
